# Supplementary material for: Spatial Gene Expression Analysis Reveals Drivers of Extremely Early Lymph Node Metastasis in Breast Cancer
Source: Research Square preprint supplement (doi:10.21203/rs.3.rs-7371816/v1), 2025-09-23
Supplement: Supplementary file 1 [file 87a7ac8d63e8f0944e52e351.xlsx]

## Sheet: Suppl.Table1
SupplmentaryTable1_Clinicopathologic information of sample
Age	80
Tumor size	2.7cmx 2.1cmx 2.0cm
Estrogen Receptor status	0
Progesteron Receptor status	0
HER2 amplification	3+, (HER2/cep17 ratio:1.28, HER2 average/cell; 4.15)
Ki-67 status	0.2
Histological Grade	Grade2(Score;7)
HER2, human epidermal growth factor receptor 2

## Sheet: Suppl.Table2
Supplementary Table 2 General statistics RNA-seq, Enzymatic Methylation sequencing (EM-seq) and whole-genome short read sequencing (WGS)
	RNA-seq		EM-seq		WGS
Region	Total read pairs	Uniquely mapped	Total read pairs	Uniquely mapped	Total read pairs	Mapped read pairs	Depth (×)
		read pairs		read pairs
NC-1	1044680840	81087254	473714407	362020351	1049297479	1044680840	32.9
NC-2	1042452872	65408137	421318811	333447601	1047088622	1042452872	34.4
Ca-3	839280384	71900417	515567477	151533526	849159744	839280384	22.9
Ca-4	1067694626	78874715	397150664	211108517	1074293809	1067694626	24.2
BRC26-Normal	-	-	-	-	734909734	734909734	24.6

## Sheet: Suppl.Table3
Supplementary Table 3. Custome gene list of Xenium
CD49(ITGA6)
CD44
CD24
CD200
PDK4
TAC1
CD79B
CD9
CD4
IGF1
SLAMF7
SH3YL1
CDH1
TNFRSF17
FOXP3
TRAPPC3
PRDM1
KARS
MYLK
FAM107B
PDE4A
FSTL3
TPD52
TRAF4
FBLN1
RAPGEF3
TCF7
PTPRC
PGR
SMAP2
CTTN
CEACAM6
MMP2
LAG3
LYZ
ESR1
ANGPT2
CCDC80
HOOK2
SRPK1
DSP
SCD
CTSG
TCL1A
DNTTIP1
SMS
KLF5
CRISPLD2
SFRP1
SQLE
CD79A
NKG7
TMEM147
PTN
CAV1
SFRP4
PTGDS
GATA3
CXCL12
ACTA2
MAP3K8
CCDC6
KRT23
CCL8
UCP1
LPXN
CCND1
HPX
VWF
CD69
LDHB
KLRB1
CD83
LY86
GZMK
SEC24A
PDGFRB
CD86
CYTIP
GNLY
MLPH
C2orf42
CTH
SLAMF1
CENPF
LGALSL
EPCAM
CD274
ABCC11
CD80
CXCR4
ADGRE5
SDC4
SNAI1
LYPD3
CEACAM8
SCGB2A1
CD93
CCR7
TUBA4A
FGL2
KDR
CDC42EP1
APOBEC3A
HOXD9
CD68
FOXA1
APOC1
RAMP2
TOP2A
PPARG
POSTN
MYH11
LARS
NARS
IL2RA
KLRD1
KLRC1
DSC2
PDGFRA
HAVCR2
KRT7
MDM2
ITM2C
FLNB
PIM1
TFAP2A
TUBB2B
HMGA1
RAB30
SLC5A6
DUSP5
CD27
GLIPR1
LUM
WARS
ITGAX
IGSF6
ERBB2
DPT
RORC
S100A8
OCIAD2
TIFA
USP53
GZMA
EGFR
IL2RG
SLC25A37
ANKRD30A
ZEB1
MKI67
NCAM1
KLRF1
DST
BANK1
CD8A
ANKRD29
DNAAF1
ENAH
VOPP1
MS4A1
TIMP4
KIT
DUSP2
FCER1G
STC1
C1QC
CLIC6
RUNX1
CD3G
DMKN
CXCL16
PIGR
ACTG2
NOSTRIN
MNDA
CTLA4
CXCL5
CPA3
ESM1
SOX17
AQP3
GJB2
AVPR1A
PLD4
SEC11C
PCLAF
C15orf48
MYO5B
DAPK3
CX3CR1
RHOH
CAVIN2
ADAM9
IL7R
AR
GPR183
ZEB2
FASN
ITGAM
KRT8
CD14
MZB1
SERPINB9
OPRPN
ZNF562
QARS
LRRC15
TPSAB1
EGFL7
MMRN2
TRIB1
C1QA
THAP2
AGR3
JUP
LPL
HOXD8
CLEC14A
FOXC2
BASP1
TCIM
CD19
CD163
ERN1
C5orf46
FCER1A
APOBEC3B
SSTR2
PRF1
OXTR
ADIPOQ
TIGIT
RTKN2
BACE2
TCEAL7
TENT5C
SERHL2
ALDH1A3
TACSTD2
CLECL1
PTRHD1
MUC6
IL3RA
KRT6B
NDUFA4L2
KRT5
KRT14
AKR1C1
EIF4EBP1
C6orf132
PDCD1
SELL
S100A14
MYBPC1
SERPINA3
AKR1C3
S100A4
MMP1
ADH1B
TCF4
TOMM7
SVIL
PELI1
PDCD1LG2
FAM49A
CLEC9A
CD247
CD3E
FCGR3A
SOX18
AIF1
ANKRD28
LTB
LILRA4
AQP1
MRC1
CCPG1
PECAM1
MMP12
SPIB
CCL5
TRAC
MED12
TERT
RARA
KMT2D
CDKN2B
PIK3CA
KMT2C
PTEN
TFF1
TIMP1
CNN1
CNN2
TP63
THY1
MUC1
KRT10
KRT18
KRT19
SCUBE2
SNAI2
COL10A1
COL1A1
COL1A2
COL2A1
COL3A1
COL4A1
COL5A1
COL6A1
CXCL1
CXCL10
CXCL11
CXCL13
CXCL14
CXCL2
CXCL9
CXCR6
CXCR7
TP53BP2
TP53TG1
VEGFA
VIM
SPARC
SPARCL1
FLNA
SYNE1
CDKN2A
TFF3
AZGP1
SOX4
SPON2
CD10(MME)
TP75
STK15(AURKA）
CathepsinL2(CTSV, CTSL2)
GSTM1
ACTB
GAPDH
TFRC
ACTR3B
ANLN
BAG1
BCL2
BIRC5
BLVRA
CCNB1
CCNE1
CDC20
CDC6
CDCA1
CDH3
CEP55
CXXC5
EXO1
FGFR4
FOXC1
GPR160
GRB7
KIF2C
KNTC2
KRT17
MAPT
MELK
MIA
MMP11
MYBL2
MYC
NAT1
ORC6L
PHGDH
PTTG1
RRM2
SLC39A6
TMEM45B
TYMS
UBE2C
UBE2T

## Sheet: Suppl.Table4
Supplementary Table 4. Result of gene enrichement analysis across Xenium clusters
_MEMBER_C1	_MEMBER_C2	_MEMBER_C3	_MEMBER_C4	_MEMBER_C5	_MEMBER_C6	_LogP_C1	_LogP_C2	_LogP_C3	_LogP_C4	_LogP_C5	_LogP_C6	GO	_PATTERN_	_RANK_	GiniIndex	Category	CategoryID	Description	PARENT_GO	LogP	Enrichment	Z-score	#TotalGeneInLibrary	#GeneInGO	#GeneInHitList	#GeneInGOAndHitList	%InGO	STDV %InGO	GeneID	Hits	Log(q-value)	EvidenceCutoff	GROUP_ID	FirstInGroupByEnrichment	FirstInGroupByLogP	BestLogPInGroup	BestEnrichmentInGroup	URL
1	0	0	0	0	0	-5.62224	0	0	0	0	0	R-HSA-975634	M100000	1	0	Reactome Gene Sets	6	Retinoid metabolism and transport		-5.62224	113.85	18.3363	30284	38	21	3	14.2857	7.63604	1645|6385|8644	AKR1C1|SDC4|AKR1C3	-3.96039	0	98	1	1	-5.62224	113.85
1	0	0	0	0	0	-5.4892	0	0	0	0	0	R-HSA-6806667	M100000	1	0	Reactome Gene Sets	6	Metabolism of fat-soluble vitamins		-5.4892	103.007	17.4262	30284	42	21	3	14.2857	7.63604	1645|6385|8644	AKR1C1|SDC4|AKR1C3	-3.85375	0	98	0	0	-5.62224	113.85
1	0	0	0	0	0	-5.39774	0	0	0	0	0	WP98	M100000	1	0	WikiPathways	27	Prostaglandin synthesis and regulation		-5.39774	96.1397	16.8243	30284	45	21	3	14.2857	7.63604	1645|5468|8644	AKR1C1|PPARG|AKR1C3	-3.78309	0	98	0	0	-5.62224	113.85
1	0	0	0	0	0	-4.45991	0	0	0	0	0	R-HSA-2187338	M100000	1	0	Reactome Gene Sets	6	Visual phototransduction		-4.45991	47.0248	11.6464	30284	92	21	3	14.2857	7.63604	1645|6385|8644	AKR1C1|SDC4|AKR1C3	-2.99758	0	98	0	0	-5.62224	113.85
1	1	1	1	0	1	-4.23964	-3.25319	-4.20657	-4.40557	0	-7.35969	GO:0007162	M111101	5	0	GO Biological Processes	19	negative regulation of cell adhesion	19_GO:0048519 negative regulation of biological process	-13.649	9.85422	12.7208	30284	312	197	20	10.1523	2.1518	928|942|999|1277|2064|4070|4072|4313|4582|5728|5788|6385|6387|6591|7422|9404|10631|10875|57162|84868	CD9|CD86|CDH1|COL1A1|ERBB2|TACSTD2|EPCAM|MMP2|MUC1|PTEN|PTPRC|SDC4|CXCL12|SNAI2|VEGFA|LPXN|POSTN|FGL2|PELI1|HAVCR2	-10.5153	0	11	0	0	-14.493	14.3474
1	1	1	1	0	1	-4.17617	-3.91418	-4.63284	-6.21006	0	-11.8843	GO:0030855	M111101	5	0	GO Biological Processes	19	epithelial cell differentiation	19_GO:0032502 developmental process	-18.3833	7.6149	13.7518	30284	646	197	32	16.2437	2.62795	59|367|857|1001|1282|1291|1645|1832|2194|2316|2317|2625|3852|3854|3855|3858|3861|3872|3880|5175|5468|5914|6659|7298|7422|7431|7852|8626|8644|8754|10409|100133941	ACTA2|AR|CAV1|CDH3|COL4A1|COL6A1|AKR1C1|DSP|FASN|FLNA|FLNB|GATA3|KRT5|KRT6B|KRT7|KRT10|KRT14|KRT17|KRT19|PECAM1|PPARG|RARA|SOX4|TYMS|VEGFA|VIM|CXCR4|TP63|AKR1C3|ADAM9|BASP1|CD24	-14.4044	0	5	1	1	-18.3833	9.36401
1	0	0	0	0	0	-4.06578	0	0	0	0	0	GO:0010038	M100000	1	0	GO Biological Processes	19	response to metal ion	19_GO:0050896 response to stimulus	-4.73785	4.88724	5.88452	30284	346	197	11	5.58376	1.63589	360|857|929|999|1956|4193|6279|7020|7037|8644|8754	AQP3|CAV1|CD14|CDH1|EGFR|MDM2|S100A8|TFAP2A|TFRC|AKR1C3|ADAM9	-3.09243	0	118	1	1	-4.73785	23.7708
1	0	0	1	0	1	-3.89001	0	0	-4.97782	0	-7.3745	GO:0030216	M100101	3	0	GO Biological Processes	19	keratinocyte differentiation	19_GO:0032502 developmental process	-9.73254	12.9001	11.542	30284	143	197	12	6.09137	1.70403	1001|1832|2317|3852|3854|3855|3858|3861|3872|8626|8644|8754	CDH3|DSP|FLNB|KRT5|KRT6B|KRT7|KRT10|KRT14|KRT17|TP63|AKR1C3|ADAM9	-7.19301	0	7	0	0	-16.2229	21.1038
1	0	0	0	0	0	-3.78663	0	0	0	0	0	GO:0015718	M100000	1	0	GO Biological Processes	19	monocarboxylic acid transport	19_GO:0051179 localization	-3.78663	27.9115	8.8484	30284	155	21	3	14.2857	7.63604	1645|5468|85320	AKR1C1|PPARG|ABCC11	-2.45564	0	130	1	1	-3.78663	27.9115
1	0	0	0	0	0	-3.77839	0	0	0	0	0	GO:2000377	M100000	1	0	GO Biological Processes	19	regulation of reactive oxygen species metabolic process	19_GO:0050789 regulation of biological process	-3.77839	27.7326	8.81803	30284	156	21	3	14.2857	7.63604	1645|7020|8644	AKR1C1|TFAP2A|AKR1C3	-2.44839	0	98	0	0	-5.62224	113.85
1	0	0	1	0	1	-3.75305	0	0	-2.28099	0	-4.85219	GO:0008285	M100101	3	0	GO Biological Processes	19	negative regulation of cell population proliferation	19_GO:0048519 negative regulation of biological process	-10.815	5.02751	9.3118	30284	795	197	26	13.198	2.41149	199|367|563|857|928|942|990|2064|2625|3159|4332|5468|5728|5764|5914|6385|6422|6424|6591|6659|6678|7020|7453|10221|57162|84868	AIF1|AR|AZGP1|CAV1|CD9|CD86|CDC6|ERBB2|GATA3|HMGA1|MNDA|PPARG|PTEN|PTN|RARA|SDC4|SFRP1|SFRP4|SNAI2|SOX4|SPARC|TFAP2A|WARS1|TRIB1|PELI1|HAVCR2	-8.01218	0	17	1	1	-10.815	5.02751
1	0	0	0	0	0	-3.58138	0	0	0	0	0	GO:0071248	M100000	1	0	GO Biological Processes	19	cellular response to metal ion	19_GO:0050896 response to stimulus	-3.58138	23.7708	8.11651	30284	182	21	3	14.2857	7.63604	999|7020|8644	CDH1|TFAP2A|AKR1C3	-2.29049	0	118	0	0	-4.73785	23.7708
1	0	0	1	0	0	-3.54005	0	0	-2.18664	0	0	R-HSA-196854	M100100	2	0	Reactome Gene Sets	6	Metabolism of vitamins and cofactors		-3.54005	23.0122	7.97518	30284	188	21	3	14.2857	7.63604	1645|6385|8644	AKR1C1|SDC4|AKR1C3	-2.25447	0	98	0	0	-5.62224	113.85
1	0	0	1	0	1	-3.41765	0	0	-4.20783	0	-6.28047	GO:0009913	M100101	3	0	GO Biological Processes	19	epidermal cell differentiation	19_GO:0032502 developmental process	-7.89709	8.91165	9.24225	30284	207	197	12	6.09137	1.70403	1001|1832|2317|3852|3854|3855|3858|3861|3872|8626|8644|8754	CDH3|DSP|FLNB|KRT5|KRT6B|KRT7|KRT10|KRT14|KRT17|TP63|AKR1C3|ADAM9	-5.69998	0	7	0	0	-16.2229	21.1038
1	0	0	1	0	0	-3.40544	0	0	-4.18808	0	0	GO:0022408	M100100	2	0	GO Biological Processes	19	negative regulation of cell-cell adhesion	19_GO:0048519 negative regulation of biological process	-6.85781	8.09084	8.32359	30284	209	197	11	5.58376	1.63589	928|942|999|2064|4072|6385|6387|7422|10875|57162|84868	CD9|CD86|CDH1|ERBB2|EPCAM|SDC4|CXCL12|VEGFA|FGL2|PELI1|HAVCR2	-4.83319	0	11	0	0	-14.493	14.3474
1	0	1	1	0	0	-3.1442	0	-2.2945	-2.74248	0	0	GO:0051222	M101100	3	0	GO Biological Processes	19	positive regulation of protein transport	19_GO:0051179 localization	-4.29388	5.3834	5.71037	30284	257	197	9	4.56853	1.48765	999|1956|2316|3728|4193|5468|6659|8754|10802	CDH1|EGFR|FLNA|JUP|MDM2|PPARG|SOX4|ADAM9|SEC24A	-2.72326	0	106	0	0	-5.25797	14.5666
1	1	1	0	0	1	-3.03209	-18.8935	-11.4551	0	0	-13.0717	R-HSA-1474244	M111001	4	0	Reactome Gene Sets	6	Extracellular matrix organization		-18.8935	40.7787	23.4304	30284	281	37	14	37.8378	7.97307	59|72|1277|1278|1282|1289|1291|1300|4060|4313|4320|5175|6678|7076	ACTA2|ACTG2|COL1A1|COL1A2|COL4A1|COL5A1|COL6A1|COL10A1|LUM|MMP2|MMP11|PECAM1|SPARC|TIMP1	-15.3917	0	4	1	1	-18.8935	204.622
1	1	1	1	0	1	-3.0232	-4.62945	-5.66603	-5.78571	0	-10.2849	GO:0043588	M111101	5	0	GO Biological Processes	19	skin development	19_GO:0032502 developmental process	-14.454	10.864	13.4903	30284	283	197	20	10.1523	2.1518	1001|1277|1278|1281|1289|1291|1832|1956|2317|3655|3728|3852|3854|3855|3858|3861|3872|8626|8644|8754	CDH3|COL1A1|COL1A2|COL3A1|COL5A1|COL6A1|DSP|EGFR|FLNB|ITGA6|JUP|KRT5|KRT6B|KRT7|KRT10|KRT14|KRT17|TP63|AKR1C3|ADAM9	-11.2533	0	7	0	0	-16.2229	21.1038
1	0	0	0	0	0	-2.96278	0	0	0	0	0	GO:1903532	M100000	1	0	GO Biological Processes	19	positive regulation of secretion by cell	19_GO:0051179 localization	-2.96278	14.5666	6.18923	30284	297	21	3	14.2857	7.63604	5468|6385|8754	PPARG|SDC4|ADAM9	-1.79261	0	106	0	0	-5.25797	14.5666
1	0	0	0	0	0	-2.93368	0	0	0	0	0	GO:0046942	M100000	1	0	GO Biological Processes	19	carboxylic acid transport	19_GO:0051179 localization	-2.93368	14.2312	6.10764	30284	304	21	3	14.2857	7.63604	1645|5468|85320	AKR1C1|PPARG|ABCC11	-1.77006	0	130	0	0	-3.78663	27.9115
1	0	0	0	0	0	-2.92958	0	0	0	0	0	GO:0015849	M100000	1	0	GO Biological Processes	19	organic acid transport	19_GO:0051179 localization	-2.92958	14.1845	6.0962	30284	305	21	3	14.2857	7.63604	1645|5468|85320	AKR1C1|PPARG|ABCC11	-1.76707	0	130	0	0	-3.78663	27.9115
1	0	1	0	0	0	-2.86585	0	-2.02964	0	0	0	GO:0051047	M101000	2	0	GO Biological Processes	19	positive regulation of secretion	19_GO:0051179 localization	-2.89846	3.83117	4.12638	30284	321	197	8	4.06091	1.4063	1956|5468|6279|6385|6387|6659|8754|10802	EGFR|PPARG|S100A8|SDC4|CXCL12|SOX4|ADAM9|SEC24A	-1.53078	0	106	0	0	-5.25797	14.5666
1	0	0	1	0	0	-2.8428	0	0	-2.36713	0	0	GO:0006631	M100100	2	0	GO Biological Processes	19	fatty acid metabolic process	19_GO:0009987 cellular process	-2.8428	13.2302	5.8575	30284	327	21	3	14.2857	7.63604	1645|5468|8644	AKR1C1|PPARG|AKR1C3	-1.69421	0	98	0	0	-5.62224	113.85
1	0	0	1	0	0	-2.82769	0	0	-3.26325	0	0	GO:1904951	M100100	2	0	GO Biological Processes	19	positive regulation of establishment of protein localization	19_GO:0051179 localization	-4.17106	4.64429	5.39448	30284	331	197	10	5.07614	1.56394	999|1956|2064|2316|3728|4193|5468|6659|8754|10802	CDH1|EGFR|ERBB2|FLNA|JUP|MDM2|PPARG|SOX4|ADAM9|SEC24A	-2.62356	0	106	0	0	-5.25797	14.5666
1	0	0	1	0	1	-2.79803	0	0	-3.2164	0	-5.93102	GO:0008544	M100101	3	0	GO Biological Processes	19	epidermis development	19_GO:0032502 developmental process	-7.25342	6.34856	8.01342	30284	339	197	14	7.1066	1.83059	1001|1291|1832|1956|2317|3852|3854|3855|3858|3861|3872|8626|8644|8754	CDH3|COL6A1|DSP|EGFR|FLNB|KRT5|KRT6B|KRT7|KRT10|KRT14|KRT17|TP63|AKR1C3|ADAM9	-5.16385	0	7	0	0	-16.2229	21.1038
1	0	0	0	0	0	-2.75843	0	0	0	0	0	GO:0006869	M100000	1	0	GO Biological Processes	19	lipid transport	19_GO:0051179 localization	-2.75843	12.3608	5.63137	30284	350	21	3	14.2857	7.63604	1645|5468|85320	AKR1C1|PPARG|ABCC11	-1.62713	0	130	0	0	-3.78663	27.9115
1	0	0	1	0	0	-2.6343	0	0	-2.11194	0	0	GO:0010876	M100100	2	0	GO Biological Processes	19	lipid localization	19_GO:0051179 localization	-2.6343	11.179	5.30886	30284	387	21	3	14.2857	7.63604	1645|5468|85320	AKR1C1|PPARG|ABCC11	-1.52319	0	130	0	0	-3.78663	27.9115
1	0	0	0	0	0	-2.55439	0	0	0	0	0	GO:0015711	M100000	1	0	GO Biological Processes	19	organic anion transport	19_GO:0051179 localization	-2.55439	10.4753	5.10734	30284	413	21	3	14.2857	7.63604	1645|5468|85320	AKR1C1|PPARG|ABCC11	-1.4572	0	130	0	0	-3.78663	27.9115
1	0	1	1	1	1	-2.48526	0	-2.54665	-3.60598	-2.85141	-4.16727	GO:0009410	M101111	5	0	GO Biological Processes	19	response to xenobiotic stimulus	19_GO:0050896 response to stimulus	-8.3111	5.98018	8.48553	30284	437	197	17	8.62944	2.00061	9|595|999|1001|1063|1277|1291|1645|1956|2625|4193|4313|6097|6422|7037|7298|7852	NAT1|CCND1|CDH1|CDH3|CENPF|COL1A1|COL6A1|AKR1C1|EGFR|GATA3|MDM2|MMP2|RORC|SFRP1|TFRC|TYMS|CXCR4	-6.00893	0	40	1	1	-8.3111	11.7274
1	0	0	0	0	0	-2.45221	0	0	0	0	0	GO:0051223	M100000	1	0	GO Biological Processes	19	regulation of protein transport	19_GO:0051179 localization	-3.11679	3.42374	4.18687	30284	449	197	10	5.07614	1.56394	999|1956|2316|3728|4193|5468|6422|6659|8754|10802	CDH1|EGFR|FLNA|JUP|MDM2|PPARG|SFRP1|SOX4|ADAM9|SEC24A	-1.71542	0	106	0	0	-5.25797	14.5666
1	0	1	1	0	0	-2.32401	0	-2.34157	-2.47905	0	0	GO:1903829	M101100	3	0	GO Biological Processes	19	positive regulation of protein localization	19_GO:0051179 localization	-5.25797	4.31295	6.03823	30284	499	197	14	7.1066	1.83059	999|1956|2064|2316|3728|4193|5175|5290|5468|6659|7037|7422|8754|10802	CDH1|EGFR|ERBB2|FLNA|JUP|MDM2|PECAM1|PIK3CA|PPARG|SOX4|TFRC|VEGFA|ADAM9|SEC24A	-3.5354	0	106	1	1	-5.25797	14.5666
1	1	0	0	0	1	-2.30242	-2.47702	0	0	0	-5.58982	GO:0006897	M110001	3	0	GO Biological Processes	19	endocytosis	19_GO:0051179 localization	-7.35481	5.14437	7.62255	30284	508	197	17	8.62944	2.00061	199|857|928|929|1265|2017|2207|4645|5175|5290|5914|7037|22918|29911|58191|115677|132299	AIF1|CAV1|CD9|CD14|CNN2|CTTN|FCER1G|MYO5B|PECAM1|PIK3CA|RARA|TFRC|CD93|HOOK2|CXCL16|NOSTRIN|OCIAD2	-5.23025	0	58	1	1	-7.35481	6.29287
1	1	1	1	0	1	-2.2906	-2.46184	-2.29925	-3.2372	0	-7.58446	GO:0022407	M111101	5	0	GO Biological Processes	19	regulation of cell-cell adhesion	19_GO:0050789 regulation of biological process	-13.2746	7.19185	11.4453	30284	513	197	24	12.1827	2.33039	199|857|920|928|942|960|999|2064|2625|3561|4072|5290|5788|5914|6385|6387|6659|7037|7070|7422|10875|57162|84868|100133941	AIF1|CAV1|CD4|CD9|CD86|CD44|CDH1|ERBB2|GATA3|IL2RG|EPCAM|PIK3CA|PTPRC|RARA|SDC4|CXCL12|SOX4|TFRC|THY1|VEGFA|FGL2|PELI1|HAVCR2|CD24	-10.2251	0	11	0	0	-14.493	14.3474
1	0	0	1	0	0	-2.26273	0	0	-3.18475	0	0	GO:0032787	M100100	2	0	GO Biological Processes	19	monocarboxylic acid metabolic process	19_GO:0009987 cellular process	-3.18475	5.67382	4.85331	30284	525	61	6	9.83607	3.81296	125|220|1645|2194|6319|8644	ADH1B|ALDH1A3|AKR1C1|FASN|SCD|AKR1C3	-1.97127	0	78	0	0	-6.3854	43.1703
1	1	1	0	0	1	-2.21559	-3.29567	-2.20454	0	0	-5.3358	GO:0071396	M111001	4	0	GO Biological Processes	19	cellular response to lipid	19_GO:0050896 response to stimulus	-6.90742	4.78634	7.22442	30284	546	197	17	8.62944	2.00061	367|929|942|968|1277|1524|1645|1956|2706|4313|5914|6097|6422|7431|8644|8754|84868	AR|CD14|CD86|CD68|COL1A1|CX3CR1|AKR1C1|EGFR|GJB2|MMP2|RARA|RORC|SFRP1|VIM|AKR1C3|ADAM9|HAVCR2	-4.87549	0	34	0	0	-8.59149	192.279
1	0	0	1	0	0	-2.2134	0	0	-2.31066	0	0	GO:0070201	M100100	2	0	GO Biological Processes	19	regulation of establishment of protein localization	19_GO:0051179 localization	-3.01319	3.09138	3.99412	30284	547	197	11	5.58376	1.63589	999|1956|2064|2316|3728|4193|5468|6422|6659|8754|10802	CDH1|EGFR|ERBB2|FLNA|JUP|MDM2|PPARG|SFRP1|SOX4|ADAM9|SEC24A	-1.62816	0	106	0	0	-5.25797	14.5666
1	0	0	1	0	0	-2.21121	0	0	-3.088	0	0	GO:0010817	M100100	2	0	GO Biological Processes	19	regulation of hormone levels	19_GO:0065007 biological regulation	-3.088	5.43568	4.70766	30284	548	61	6	9.83607	3.81296	125|220|1645|2625|4311|8644	ADH1B|ALDH1A3|AKR1C1|GATA3|MME|AKR1C3	-1.89411	0	98	0	0	-5.62224	113.85
1	0	1	1	0	1	-2.18098	0	-2.16096	-3.03141	0	-2.01189	GO:0032870	M101101	4	0	GO Biological Processes	19	cellular response to hormone stimulus	19_GO:0050896 response to stimulus	-6.01805	4.37654	6.53798	30284	562	197	16	8.12183	1.94626	367|857|990|1291|1645|1956|2064|2264|2706|4193|5272|5290|5468|5914|6422|8644	AR|CAV1|CDC6|COL6A1|AKR1C1|EGFR|ERBB2|FGFR4|GJB2|MDM2|SERPINB9|PIK3CA|PPARG|RARA|SFRP1|AKR1C3	-4.1326	0	18	0	0	-10.308	34.7593
1	0	0	0	0	1	-2.16618	0	0	0	0	-2.69208	GO:0043065	M100001	2	0	GO Biological Processes	19	positive regulation of apoptotic process	19_GO:0048518 positive regulation of biological process	-8.14919	5.1332	8.05375	30284	569	197	19	9.64467	2.10323	220|857|1613|3655|4313|4332|4605|5468|5788|6279|6422|6424|6659|7020|7153|8626|8644|9833|81618	ALDH1A3|CAV1|DAPK3|ITGA6|MMP2|MNDA|MYBL2|PPARG|PTPRC|S100A8|SFRP1|SFRP4|SOX4|TFAP2A|TOP2A|TP63|AKR1C3|MELK|ITM2C	-5.89049	0	45	1	1	-8.14919	8.25374
1	0	0	0	0	1	-2.16199	0	0	0	0	-2.68446	GO:0010256	M100001	2	0	GO Biological Processes	19	endomembrane system organization	19_GO:0009987 cellular process	-2.68446	4.54601	4.11746	30284	571	70	6	8.57143	3.34594	857|1289|1291|5728|5788|7852	CAV1|COL5A1|COL6A1|PTEN|PTPRC|CXCR4	-1.5649	0	92	0	0	-5.78721	44.7547
1	0	0	0	0	0	-2.16199	0	0	0	0	0	GO:1903530	M100000	1	0	GO Biological Processes	19	regulation of secretion by cell	19_GO:0051179 localization	-2.16199	7.57668	4.17931	30284	571	21	3	14.2857	7.63604	5468|6385|8754	PPARG|SDC4|ADAM9	-1.12785	0	106	0	0	-5.25797	14.5666
1	0	0	0	0	1	-2.13104	0	0	0	0	-2.62832	GO:0043068	M100001	2	0	GO Biological Processes	19	positive regulation of programmed cell death	19_GO:0048518 positive regulation of biological process	-7.94411	4.98429	7.88096	30284	586	197	19	9.64467	2.10323	220|857|1613|3655|4313|4332|4605|5468|5788|6279|6422|6424|6659|7020|7153|8626|8644|9833|81618	ALDH1A3|CAV1|DAPK3|ITGA6|MMP2|MNDA|MYBL2|PPARG|PTPRC|S100A8|SFRP1|SFRP4|SOX4|TFAP2A|TOP2A|TP63|AKR1C3|MELK|ITM2C	-5.73241	0	45	0	0	-8.14919	8.25374
1	0	0	0	0	0	-2.12495	0	0	0	0	0	R-HSA-9709957	M100000	1	0	Reactome Gene Sets	6	Sensory Perception		-2.12495	7.34514	4.09647	30284	589	21	3	14.2857	7.63604	1645|6385|8644	AKR1C1|SDC4|AKR1C3	-1.09691	0	98	0	0	-5.62224	113.85
1	1	1	1	0	1	-2.08719	-11.3454	-5.87182	-4.53597	0	-13.4821	GO:0097435	M111101	5	0	GO Biological Processes	19	supramolecular fiber organization	19_GO:0009987 cellular process	-16.2229	7.33232	12.7631	30284	608	197	29	14.7208	2.52438	199|1265|1277|1278|1281|1289|1291|1832|2296|2316|3852|3854|3855|3856|3858|3861|3872|3880|4060|4193|4320|4604|4645|6840|7431|9839|10409|11004|29911	AIF1|CNN2|COL1A1|COL1A2|COL3A1|COL5A1|COL6A1|DSP|FOXC1|FLNA|KRT5|KRT6B|KRT7|KRT8|KRT10|KRT14|KRT17|KRT19|LUM|MDM2|MMP11|MYBPC1|MYO5B|SVIL|VIM|ZEB2|BASP1|KIF2C|HOOK2	-12.5451	0	7	1	1	-16.2229	21.1038
1	0	0	0	0	0	-2.05259	0	0	0	0	0	GO:0051046	M100000	1	0	GO Biological Processes	19	regulation of secretion	19_GO:0051179 localization	-2.05259	6.911	3.93668	30284	626	21	3	14.2857	7.63604	5468|6385|8754	PPARG|SDC4|ADAM9	-1.03277	0	106	0	0	-5.25797	14.5666
0	1	1	0	0	1	0	-27.2132	-16.4822	0	0	-21.6004	M5930	M011001	3	0	Hallmark Gene Sets	23	HALLMARK EPITHELIAL MESENCHYMAL TRANSITION		-27.2132	69.5714	34.029	30284	200	37	17	45.9459	8.19289	59|1277|1278|1281|1282|1289|2316|4060|4313|4638|6387|6424|6678|7070|7076|7431|10631	ACTA2|COL1A1|COL1A2|COL3A1|COL4A1|COL5A1|FLNA|LUM|MMP2|MYLK|CXCL12|SFRP4|SPARC|THY1|TIMP1|VIM|POSTN	-22.9333	0	1	1	1	-27.2132	69.5714
0	1	1	0	0	1	0	-15.3328	-11.4704	0	0	-6.55628	GO:0030198	M011001	3	0	GO Biological Processes	19	extracellular matrix organization	19_GO:0009987 cellular process	-15.3328	35.078	20.0365	30284	280	37	12	32.4324	7.69588	1277|1278|1281|1282|1289|1291|1300|4060|4313|4320|10631|151887	COL1A1|COL1A2|COL3A1|COL4A1|COL5A1|COL6A1|COL10A1|LUM|MMP2|MMP11|POSTN|CCDC80	-12.1297	0	4	0	0	-18.8935	204.622
0	1	1	0	0	1	0	-15.3142	-11.4551	0	0	-6.54453	GO:0043062	M011001	3	0	GO Biological Processes	19	extracellular structure organization	19_GO:0009987 cellular process	-15.3142	34.9532	19.9991	30284	281	37	12	32.4324	7.69588	1277|1278|1281|1282|1289|1291|1300|4060|4313|4320|10631|151887	COL1A1|COL1A2|COL3A1|COL4A1|COL5A1|COL6A1|COL10A1|LUM|MMP2|MMP11|POSTN|CCDC80	-12.1297	0	4	0	0	-18.8935	204.622
0	1	1	0	0	1	0	-15.2957	-11.4398	0	0	-6.53282	GO:0045229	M011001	3	0	GO Biological Processes	19	external encapsulating structure organization	19_GO:0009987 cellular process	-15.2957	34.8292	19.9618	30284	282	37	12	32.4324	7.69588	1277|1278|1281|1282|1289|1291|1300|4060|4313|4320|10631|151887	COL1A1|COL1A2|COL3A1|COL4A1|COL5A1|COL6A1|COL10A1|LUM|MMP2|MMP11|POSTN|CCDC80	-12.1297	0	4	0	0	-18.8935	204.622
0	1	1	0	0	1	0	-14.3301	-11.8032	0	0	-8.30004	R-HSA-1442490	M011001	3	0	Reactome Gene Sets	6	Collagen degradation		-14.3301	110.981	29.5747	30284	59	37	8	21.6216	6.7677	1277|1278|1282|1289|1291|1300|4313|4320	COL1A1|COL1A2|COL4A1|COL5A1|COL6A1|COL10A1|MMP2|MMP11	-11.2263	0	4	0	0	-18.8935	204.622
0	1	1	0	0	1	0	-13.7065	-9.9996	0	0	-5.45964	M5884	M011001	3	0	Canonical Pathways	11	NABA CORE MATRISOME		-13.7065	32.7395	18.4927	30284	275	37	11	29.7297	7.51416	1277|1278|1281|1282|1289|1291|1300|4060|6678|8404|10631	COL1A1|COL1A2|COL3A1|COL4A1|COL5A1|COL6A1|COL10A1|LUM|SPARC|SPARCL1|POSTN	-10.7039	0	4	0	0	-18.8935	204.622
0	1	1	0	0	1	0	-13.7051	-9.28677	0	0	-11.3429	R-HSA-216083	M011001	3	0	Reactome Gene Sets	6	Integrin cell surface interactions		-13.7051	93.5413	27.1106	30284	70	37	8	21.6216	6.7677	1277|1278|1282|1289|1291|1300|4060|5175	COL1A1|COL1A2|COL4A1|COL5A1|COL6A1|COL10A1|LUM|PECAM1	-10.7039	0	4	0	0	-18.8935	204.622
0	1	1	0	0	1	0	-13.4077	-9.36628	0	0	-7.6838	R-HSA-1474228	M011001	3	0	Reactome Gene Sets	6	Degradation of the extracellular matrix		-13.4077	57.1037	22.334	30284	129	37	9	24.3243	7.05339	1277|1278|1282|1289|1291|1300|4313|4320|7076	COL1A1|COL1A2|COL4A1|COL5A1|COL6A1|COL10A1|MMP2|MMP11|TIMP1	-10.508	0	4	0	0	-18.8935	204.622
0	1	1	0	0	1	0	-13.0836	-10.5445	0	0	-7.23833	M3005	M011001	3	0	Canonical Pathways	11	NABA COLLAGENS		-13.0836	130.214	29.9988	30284	44	37	7	18.9189	6.43883	1277|1278|1281|1282|1289|1291|1300	COL1A1|COL1A2|COL3A1|COL4A1|COL5A1|COL6A1|COL10A1	-10.2543	0	4	0	0	-18.8935	204.622
0	1	1	0	0	1	0	-12.9393	-10.4225	0	0	-7.13876	M198	M011001	3	0	Canonical Pathways	11	PID SYNDECAN 1 PATHWAY		-12.9393	124.552	29.33	30284	46	37	7	18.9189	6.43883	1277|1278|1281|1282|1289|1291|1300	COL1A1|COL1A2|COL3A1|COL4A1|COL5A1|COL6A1|COL10A1	-10.1645	0	4	0	0	-18.8935	204.622
0	1	1	0	0	1	0	-11.9313	-11.5949	0	0	-6.44204	GO:0030199	M011001	3	0	GO Biological Processes	19	collagen fibril organization	19_GO:0009987 cellular process	-11.9313	90.9429	24.9944	30284	63	37	7	18.9189	6.43883	1277|1278|1281|1289|1291|4060|4320	COL1A1|COL1A2|COL3A1|COL5A1|COL6A1|LUM|MMP11	-9.21991	0	4	0	0	-18.8935	204.622
0	1	1	0	0	1	0	-11.8814	-7.59522	0	0	-8.08283	R-HSA-3000171	M011001	3	0	Reactome Gene Sets	6	Non-integrin membrane-ECM interactions		-11.8814	89.522	24.7944	30284	64	37	7	18.9189	6.43883	59|72|1277|1278|1282|1289|1300	ACTA2|ACTG2|COL1A1|COL1A2|COL4A1|COL5A1|COL10A1	-9.21424	0	4	0	0	-18.8935	204.622
0	1	1	0	0	1	0	-11.8814	-9.52693	0	0	-9.83889	R-HSA-3000178	M011001	3	0	Reactome Gene Sets	6	ECM proteoglycans		-11.8814	89.522	24.7944	30284	64	37	7	18.9189	6.43883	1277|1278|1282|1289|1291|4060|6678	COL1A1|COL1A2|COL4A1|COL5A1|COL6A1|LUM|SPARC	-9.21424	0	4	0	0	-18.8935	204.622
0	1	1	0	0	1	0	-11.4232	-11.0874	0	0	-7.69785	M160	M011001	3	0	Canonical Pathways	11	PID AVB3 INTEGRIN PATHWAY		-11.4232	77.4244	23.0214	30284	74	37	7	18.9189	6.43883	1277|1278|1281|1282|1289|1291|1300	COL1A1|COL1A2|COL3A1|COL4A1|COL5A1|COL6A1|COL10A1	-8.86256	0	4	0	0	-18.8935	204.622
0	1	1	0	0	1	0	-11.1624	-8.70643	0	0	-7.51004	R-HSA-8948216	M011001	3	0	Reactome Gene Sets	6	Collagen chain trimerization		-11.1624	125.921	27.3024	30284	39	37	6	16.2162	6.05974	1277|1278|1282|1289|1291|1300	COL1A1|COL1A2|COL4A1|COL5A1|COL6A1|COL10A1	-8.66062	0	4	0	0	-18.8935	204.622
0	1	1	0	0	1	0	-10.5827	-8.73643	0	0	-10.7312	GO:0001568	M011001	3	0	GO Biological Processes	19	blood vessel development	19_GO:0032502 developmental process	-10.7312	11.3423	11.6062	30284	534	70	14	20	4.78091	59|857|1277|1278|1282|1289|2296|2316|4313|4638|5175|5290|7070|22918	ACTA2|CAV1|COL1A1|COL1A2|COL4A1|COL5A1|FOXC1|FLNA|MMP2|MYLK|PECAM1|PIK3CA|THY1|CD93	-8.29019	0	1	0	0	-27.2132	69.5714
0	1	1	0	0	1	0	-10.3957	-8.56864	0	0	-10.4995	GO:0001944	M011001	3	0	GO Biological Processes	19	vasculature development	19_GO:0032502 developmental process	-10.4995	10.8935	11.3331	30284	556	70	14	20	4.78091	59|857|1277|1278|1282|1289|2296|2316|4313|4638|5175|5290|7070|22918	ACTA2|CAV1|COL1A1|COL1A2|COL4A1|COL5A1|FOXC1|FLNA|MMP2|MYLK|PECAM1|PIK3CA|THY1|CD93	-8.1117	0	1	0	0	-27.2132	69.5714
0	1	1	0	0	1	0	-10.3329	-8.21286	0	0	-5.33672	hsa04974	M011001	3	0	KEGG Pathway	24	Protein digestion and absorption		-10.3329	54.5658	19.2304	30284	105	37	7	18.9189	6.43883	1277|1278|1281|1282|1289|1291|1300	COL1A1|COL1A2|COL3A1|COL4A1|COL5A1|COL6A1|COL10A1	-7.97726	0	4	0	0	-18.8935	204.622
0	1	1	0	0	1	0	-10.3204	-8.01486	0	0	-8.58816	R-HSA-2022090	M011001	3	0	Reactome Gene Sets	6	Assembly of collagen fibrils and other multimeric structures		-10.3204	92.6588	23.3585	30284	53	37	6	16.2162	6.05974	1277|1278|1282|1289|1291|1300	COL1A1|COL1A2|COL4A1|COL5A1|COL6A1|COL10A1	-7.97495	0	4	0	0	-18.8935	204.622
0	1	1	1	0	1	0	-10.0439	-8.25329	-2.1442	0	-13.5753	GO:0030335	M011101	4	0	GO Biological Processes	19	positive regulation of cell migration	19_GO:0040011 locomotion	-15.4254	7.17387	12.3599	30284	600	197	28	14.2132	2.48784	59|199|857|1277|1524|1613|1956|2316|2625|2886|3655|3687|4193|4313|4638|5175|5764|5788|6387|6591|6678|7070|7422|7852|8754|10631|57402|58191	ACTA2|AIF1|CAV1|COL1A1|CX3CR1|DAPK3|EGFR|FLNA|GATA3|GRB7|ITGA6|ITGAX|MDM2|MMP2|MYLK|PECAM1|PTN|PTPRC|CXCL12|SNAI2|SPARC|THY1|VEGFA|CXCR4|ADAM9|POSTN|S100A14|CXCL16	-11.9236	0	8	1	1	-15.4254	9.60787
0	1	1	0	0	1	0	-9.98442	-7.73839	0	0	-6.54928	R-HSA-1650814	M011001	3	0	Reactome Gene Sets	6	Collagen biosynthesis and modifying enzymes		-9.98442	81.8486	21.9246	30284	60	37	6	16.2162	6.05974	1277|1278|1282|1289|1291|1300	COL1A1|COL1A2|COL4A1|COL5A1|COL6A1|COL10A1	-7.68225	0	4	0	0	-18.8935	204.622
0	1	1	1	0	1	0	-9.81934	-8.05213	-2.05774	0	-13.2322	GO:2000147	M011101	4	0	GO Biological Processes	19	positive regulation of cell motility	19_GO:0040011 locomotion	-14.8901	6.83226	11.9704	30284	630	197	28	14.2132	2.48784	59|199|857|1277|1524|1613|1956|2316|2625|2886|3655|3687|4193|4313|4638|5175|5764|5788|6387|6591|6678|7070|7422|7852|8754|10631|57402|58191	ACTA2|AIF1|CAV1|COL1A1|CX3CR1|DAPK3|EGFR|FLNA|GATA3|GRB7|ITGA6|ITGAX|MDM2|MMP2|MYLK|PECAM1|PTN|PTPRC|CXCL12|SNAI2|SPARC|THY1|VEGFA|CXCR4|ADAM9|POSTN|S100A14|CXCL16	-11.5458	0	8	0	0	-15.4254	9.60787
0	1	1	0	0	1	0	-9.72787	-9.44434	0	0	-6.34006	GO:0032963	M011001	3	0	GO Biological Processes	19	collagen metabolic process	19_GO:0009987 cellular process	-9.72787	74.4079	20.8805	30284	66	37	6	16.2162	6.05974	1277|1278|1289|1291|4313|4320	COL1A1|COL1A2|COL5A1|COL6A1|MMP2|MMP11	-7.44797	0	4	0	0	-18.8935	204.622
0	1	1	0	0	1	0	-9.72787	-9.44434	0	0	-8.00095	M18	M011001	3	0	Canonical Pathways	11	PID INTEGRIN1 PATHWAY		-9.72787	74.4079	20.8805	30284	66	37	6	16.2162	6.05974	1277|1278|1281|1282|1289|1291	COL1A1|COL1A2|COL3A1|COL4A1|COL5A1|COL6A1	-7.44797	0	4	0	0	-18.8935	204.622
0	1	1	1	0	1	0	-9.70414	-7.94899	-2.01367	0	-13.0564	GO:0040017	M011101	4	0	GO Biological Processes	19	positive regulation of locomotion	19_GO:0040011 locomotion	-14.6167	6.66304	11.7729	30284	646	197	28	14.2132	2.48784	59|199|857|1277|1524|1613|1956|2316|2625|2886|3655|3687|4193|4313|4638|5175|5764|5788|6387|6591|6678|7070|7422|7852|8754|10631|57402|58191	ACTA2|AIF1|CAV1|COL1A1|CX3CR1|DAPK3|EGFR|FLNA|GATA3|GRB7|ITGA6|ITGAX|MDM2|MMP2|MYLK|PECAM1|PTN|PTPRC|CXCL12|SNAI2|SPARC|THY1|VEGFA|CXCR4|ADAM9|POSTN|S100A14|CXCL16	-11.3368	0	8	0	0	-15.4254	9.60787
0	1	1	1	0	1	0	-9.47475	-6.16696	-3.97463	0	-7.18077	hsa04820	M011101	4	0	KEGG Pathway	24	Cytoskeleton in muscle cells		-9.47475	28.2237	14.5584	30284	232	37	8	21.6216	6.7677	72|1277|1278|1281|1282|1289|1291|7431	ACTG2|COL1A1|COL1A2|COL3A1|COL4A1|COL5A1|COL6A1|VIM	-7.24018	0	4	0	0	-18.8935	204.622
0	1	1	0	0	1	0	-9.3857	-7.24514	0	0	-7.66243	WP5055	M011001	3	0	WikiPathways	27	Burn wound healing		-10.208	20.4968	13.6794	30284	75	197	10	5.07614	1.56394	1277|1278|2264|4313|5175|6387|6591|7076|7422|7852	COL1A1|COL1A2|FGFR4|MMP2|PECAM1|CXCL12|SNAI2|TIMP1|VEGFA|CXCR4	-7.56754	0	20	1	1	-10.208	81.8486
0	1	1	0	0	1	0	-9.21373	-7.10338	0	0	-7.49249	R-HSA-1474290	M011001	3	0	Reactome Gene Sets	6	Collagen formation		-9.21373	61.3865	18.9152	30284	80	37	6	16.2162	6.05974	1277|1278|1282|1289|1291|1300	COL1A1|COL1A2|COL4A1|COL5A1|COL6A1|COL10A1	-7.0202	0	4	0	0	-18.8935	204.622
0	1	1	0	0	0	0	-9.12289	-6.78251	0	0	0	M5944	M011000	2	0	Hallmark Gene Sets	23	HALLMARK ANGIOGENESIS		-9.12289	113.679	23.6594	30284	36	37	5	13.5135	5.62027	1281|4060|6275|7076|10631	COL3A1|LUM|S100A4|TIMP1|POSTN	-6.93641	0	31	1	1	-9.12289	113.679
0	1	1	0	0	1	0	-8.99933	-6.68537	0	0	-5.73984	WP2911	M011001	3	0	WikiPathways	27	miRNA targets in ECM and membrane receptors		-8.99933	107.696	23.0178	30284	38	37	5	13.5135	5.62027	1278|1281|1282|1289|1291	COL1A2|COL3A1|COL4A1|COL5A1|COL6A1	-6.82665	0	4	0	0	-18.8935	204.622
0	1	1	0	0	1	0	-8.84302	-10.4077	0	0	-5.61967	GO:0071230	M011001	3	0	GO Biological Processes	19	cellular response to amino acid stimulus	19_GO:0050896 response to stimulus	-10.4077	56.2004	19.524	30284	92	41	7	17.0732	5.87642	1277|1278|1281|1291|1956|4313|51520	COL1A1|COL1A2|COL3A1|COL6A1|EGFR|MMP2|LARS1	-8.0363	0	14	0	0	-11.9972	246.211
0	1	1	0	0	1	0	-8.71845	-4.56268	0	0	-7.28994	M53	M011001	3	0	Canonical Pathways	11	PID INTEGRIN3 PATHWAY		-8.71845	95.1728	21.6133	30284	43	37	5	13.5135	5.62027	1277|1278|1282|5175|7070	COL1A1|COL1A2|COL4A1|PECAM1|THY1	-6.5721	0	4	0	0	-18.8935	204.622
0	1	1	0	0	1	0	-8.5967	-11.9972	0	0	-6.88397	GO:0071229	M011001	3	0	GO Biological Processes	19	cellular response to acid chemical	19_GO:0050896 response to stimulus	-11.9972	58.5057	21.3142	30284	101	41	8	19.5122	6.18908	1277|1278|1281|1291|1956|4313|7422|51520	COL1A1|COL1A2|COL3A1|COL6A1|EGFR|MMP2|VEGFA|LARS1	-9.26136	0	14	1	1	-11.9972	246.211
0	1	1	0	0	1	0	-8.2443	-8.0593	0	0	-7.10712	WP3967	M011001	3	0	WikiPathways	27	miR 509 3p alteration of YAP1 ECM axis		-8.2443	181.886	26.8487	30284	18	37	4	10.8108	5.10487	1277|1281|1289|6678	COL1A1|COL3A1|COL5A1|SPARC	-6.15753	0	42	1	1	-8.2443	181.886
0	1	1	0	0	1	0	-7.93517	-9.34267	0	0	-6.23418	hsa04926	M011001	3	0	KEGG Pathway	24	Relaxin signaling pathway		-9.34267	39.7726	16.3118	30284	130	41	7	17.0732	5.87642	59|1277|1278|1281|1956|4313|7422	ACTA2|COL1A1|COL1A2|COL3A1|EGFR|MMP2|VEGFA	-7.13096	0	14	0	0	-11.9972	246.211
0	1	1	0	0	1	0	-7.91519	-9.31924	0	0	-6.21461	GO:0043200	M011001	3	0	GO Biological Processes	19	response to amino acid	19_GO:0050896 response to stimulus	-9.31924	39.469	16.2465	30284	131	41	7	17.0732	5.87642	1277|1278|1281|1291|1956|4313|51520	COL1A1|COL1A2|COL3A1|COL6A1|EGFR|MMP2|LARS1	-7.1149	0	14	0	0	-11.9972	246.211
0	1	1	0	0	1	0	-7.77962	-3.06077	0	0	-3.52322	M5946	M011001	3	0	Hallmark Gene Sets	23	HALLMARK COAGULATION		-7.77962	35.5864	14.2426	30284	138	37	6	16.2162	6.05974	341|4313|4320|5175|6678|7076	APOC1|MMP2|MMP11|PECAM1|SPARC|TIMP1	-5.76454	0	20	0	0	-10.208	81.8486
0	1	0	0	0	1	0	-7.72459	0	0	0	-4.49274	GO:0030336	M010001	2	0	GO Biological Processes	19	negative regulation of cell migration	19_GO:0040011 locomotion	-7.72459	16.876	11.008	30284	388	37	8	21.6216	6.7677	199|1265|1281|6387|7070|7076|9839|10221	AIF1|CNN2|COL3A1|CXCL12|THY1|TIMP1|ZEB2|TRIB1	-5.71654	0	50	0	0	-7.97515	16.876
0	1	1	0	0	1	0	-7.63317	-10.6972	0	0	-5.93867	GO:0001101	M011001	3	0	GO Biological Processes	19	response to acid chemical	19_GO:0050896 response to stimulus	-10.6972	40.4731	17.6035	30284	146	41	8	19.5122	6.18908	1277|1278|1281|1291|1956|4313|7422|51520	COL1A1|COL1A2|COL3A1|COL6A1|EGFR|MMP2|VEGFA|LARS1	-8.26238	0	14	0	0	-11.9972	246.211
0	1	0	1	0	1	0	-7.59721	0	-2.0516	0	-4.3884	GO:2000146	M010101	3	0	GO Biological Processes	19	negative regulation of cell motility	19_GO:0040011 locomotion	-7.97515	6.10326	8.34538	30284	403	197	16	8.12183	1.94626	199|999|1265|1281|1524|2625|3728|4070|5468|5728|6387|6422|7070|7076|9839|10221	AIF1|CDH1|CNN2|COL3A1|CX3CR1|GATA3|JUP|TACSTD2|PPARG|PTEN|CXCL12|SFRP1|THY1|TIMP1|ZEB2|TRIB1	-5.75216	0	50	1	1	-7.97515	16.876
0	1	0	0	0	1	0	-7.4508	0	0	0	-4.26882	GO:0040013	M010001	2	0	GO Biological Processes	19	negative regulation of locomotion	19_GO:0040011 locomotion	-7.71012	5.84231	8.096	30284	421	197	16	8.12183	1.94626	199|999|1265|1281|1524|2625|3728|4070|5468|5728|6387|6422|7070|7076|9839|10221	AIF1|CDH1|CNN2|COL3A1|CX3CR1|GATA3|JUP|TACSTD2|PPARG|PTEN|CXCL12|SFRP1|THY1|TIMP1|ZEB2|TRIB1	-5.5508	0	50	0	0	-7.97515	16.876
0	1	1	0	0	1	0	-7.3585	-5.08555	0	0	-4.38311	GO:0071711	M011001	3	0	GO Biological Processes	19	basement membrane organization	19_GO:0009987 cellular process	-7.3585	112.895	21.0848	30284	29	37	4	10.8108	5.10487	1281|1282|1291|4320	COL3A1|COL4A1|COL6A1|MMP11	-5.41935	0	4	0	0	-18.8935	204.622
0	1	1	0	0	1	0	-7.35682	-4.61451	0	0	-6.1602	R-HSA-9006934	M011001	3	0	Reactome Gene Sets	6	Signaling by Receptor Tyrosine Kinases		-7.35682	15.1222	10.352	30284	433	37	8	21.6216	6.7677	1277|1278|1282|1289|1291|6387|6678|10221	COL1A1|COL1A2|COL4A1|COL5A1|COL6A1|CXCL12|SPARC|TRIB1	-5.41935	0	4	0	0	-18.8935	204.622
0	1	1	0	0	1	0	-7.01746	-4.83486	0	0	-5.88672	R-HSA-2173782	M011001	3	0	Reactome Gene Sets	6	Binding and Uptake of Ligands by Scavenger Receptors		-7.01746	93.5413	19.159	30284	35	37	4	10.8108	5.10487	1277|1278|1282|6678	COL1A1|COL1A2|COL4A1|SPARC	-5.12495	0	4	0	0	-18.8935	204.622
0	1	1	0	0	1	0	-6.82532	-6.59458	0	0	-6.88397	hsa04933	M011001	3	0	KEGG Pathway	24	AGE-RAGE signaling pathway in diabetic complications		-6.88397	25.7007	11.9683	30284	101	70	6	8.57143	3.34594	595|1277|1278|1282|4313|5290	CCND1|COL1A1|COL1A2|COL4A1|MMP2|PIK3CA	-5.01569	0	4	0	0	-18.8935	204.622
0	1	1	0	0	1	0	-6.80613	-6.4383	0	0	-6.56109	GO:0001501	M011001	3	0	GO Biological Processes	19	skeletal system development	19_GO:0032502 developmental process	-9.74314	6.01667	9.2546	30284	511	197	20	10.1523	2.1518	960|1277|1278|1281|1291|1300|2296|2625|4313|5788|5914|6422|6424|6591|7020|7076|7298|7422|8626|9968	CD44|COL1A1|COL1A2|COL3A1|COL6A1|COL10A1|FOXC1|GATA3|MMP2|PTPRC|RARA|SFRP1|SFRP4|SNAI2|TFAP2A|TIMP1|TYMS|VEGFA|TP63|MED12	-7.19564	0	25	1	1	-9.74314	9.22355
0	1	1	1	0	1	0	-6.78328	-9.552	-2.09534	0	-10.3872	hsa04510	M011101	4	0	KEGG Pathway	24	Focal adhesion		-11.2332	11.3591	11.983	30284	203	197	15	7.61421	1.88965	595|857|1277|1278|1282|1291|1956|2064|2316|2317|3655|4638|5290|5728|7422	CCND1|CAV1|COL1A1|COL1A2|COL4A1|COL6A1|EGFR|ERBB2|FLNA|FLNB|ITGA6|MYLK|PIK3CA|PTEN|VEGFA	-8.36828	0	13	0	0	-12.4213	30.7452
0	1	1	0	0	1	0	-6.66027	-2.52238	0	0	-4.99284	R-HSA-76002	M011001	3	0	Reactome Gene Sets	6	Platelet activation, signaling and aggregation		-6.66027	23.056	11.298	30284	213	37	6	16.2162	6.05974	1277|1278|2207|5175|6678|7076	COL1A1|COL1A2|FCER1G|PECAM1|SPARC|TIMP1	-4.8197	0	20	0	0	-10.208	81.8486
0	1	1	0	0	1	0	-6.54314	-4.90314	0	0	-7.31327	GO:0009612	M011001	3	0	GO Biological Processes	19	response to mechanical stimulus	19_GO:0050896 response to stimulus	-8.53968	8.9616	9.65593	30284	223	197	13	6.59898	1.76881	1265|1277|1291|1956|3728|3852|4313|5290|5764|6387|7852|10631|54532	CNN2|COL1A1|COL6A1|EGFR|JUP|KRT5|MMP2|PIK3CA|PTN|CXCL12|CXCR4|POSTN|USP53	-6.17886	0	36	1	1	-8.53968	8.9616
0	1	0	0	0	1	0	-6.43589	0	0	0	-5.59121	R-HSA-75892	M010001	2	0	Reactome Gene Sets	6	Platelet Adhesion to exposed collagen		-6.43589	204.622	24.6748	30284	12	37	3	8.10811	4.48743	1277|1278|2207	COL1A1|COL1A2|FCER1G	-4.63744	0	4	0	0	-18.8935	204.622
0	1	1	0	0	1	0	-6.42048	-6.14521	0	0	-5.92393	GO:0061448	M011001	3	0	GO Biological Processes	19	connective tissue development	19_GO:0032502 developmental process	-8.28746	8.54033	9.36956	30284	234	197	13	6.59898	1.76881	59|960|1277|1281|1289|1291|2625|5290|5914|6097|6591|7076|7298	ACTA2|CD44|COL1A1|COL3A1|COL5A1|COL6A1|GATA3|PIK3CA|RARA|RORC|SNAI2|TIMP1|TYMS	-5.99433	0	25	0	0	-9.74314	9.22355
0	1	1	1	0	1	0	-6.39465	-7.18589	-4.68707	0	-11.4182	GO:0048729	M011101	4	0	GO Biological Processes	19	tissue morphogenesis	19_GO:0032502 developmental process	-14.8714	7.16856	12.127	30284	579	197	27	13.7056	2.45023	59|72|220|367|960|1281|1282|1289|1832|1956|2296|2316|2625|3872|4070|4193|4313|4638|5914|6385|6422|6591|7020|7422|7852|8626|9968	ACTA2|ACTG2|ALDH1A3|AR|CD44|COL3A1|COL4A1|COL5A1|DSP|EGFR|FOXC1|FLNA|GATA3|KRT17|TACSTD2|MDM2|MMP2|MYLK|RARA|SDC4|SFRP1|SNAI2|TFAP2A|VEGFA|CXCR4|TP63|MED12	-11.5458	0	10	1	1	-14.8714	61.8041
0	1	1	0	0	1	0	-6.34588	-4.59045	0	0	-4.95002	hsa04611	M011001	3	0	KEGG Pathway	24	Platelet activation		-6.34588	32.4796	12.3843	30284	126	37	5	13.5135	5.62027	1277|1278|1281|2207|4638	COL1A1|COL1A2|COL3A1|FCER1G|MYLK	-4.5643	0	4	0	0	-18.8935	204.622
0	1	0	0	0	1	0	-6.32232	0	0	0	-5.47798	R-HSA-2214320	M010001	2	0	Reactome Gene Sets	6	Anchoring fibril formation		-6.32232	188.881	23.6974	30284	13	37	3	8.10811	4.48743	1277|1278|1282	COL1A1|COL1A2|COL4A1	-4.54621	0	4	0	0	-18.8935	204.622
0	1	1	0	0	1	0	-6.27667	-8.01486	0	0	-6.82332	WP5144	M011001	3	0	WikiPathways	27	NRP1 triggered signaling in pancreatic cancer		-8.01486	69.6825	18.4262	30284	53	41	5	12.1951	5.11047	1277|1278|1956|4313|7422	COL1A1|COL1A2|EGFR|MMP2|VEGFA	-5.98048	0	14	0	0	-11.9972	246.211
0	1	0	0	0	1	0	-6.21795	0	0	0	-5.37397	R-HSA-3000480	M010001	2	0	Reactome Gene Sets	6	Scavenging by Class A Receptors		-6.21795	175.39	22.8265	30284	14	37	3	8.10811	4.48743	1277|1278|1282	COL1A1|COL1A2|COL4A1	-4.45657	0	4	0	0	-18.8935	204.622
0	1	0	0	0	1	0	-6.1214	0	0	0	-5.27778	R-HSA-2243919	M010001	2	0	Reactome Gene Sets	6	Crosslinking of collagen fibrils		-6.1214	163.697	22.0438	30284	15	37	3	8.10811	4.48743	1277|1278|1282	COL1A1|COL1A2|COL4A1	-4.3768	0	4	0	0	-18.8935	204.622
0	1	1	1	0	1	0	-6.04244	-6.93934	-2.71862	0	-8.27869	WP5087	M011101	4	0	WikiPathways	27	Pleural mesothelioma		-11.8409	7.35363	10.8508	30284	439	197	21	10.6599	2.1987	59|72|595|960|999|1001|1282|1956|1978|2264|3655|4193|4313|5290|5728|6387|6422|6424|6678|7422|58508	ACTA2|ACTG2|CCND1|CD44|CDH1|CDH3|COL4A1|EGFR|EIF4EBP1|FGFR4|ITGA6|MDM2|MMP2|PIK3CA|PTEN|CXCL12|SFRP1|SFRP4|SPARC|VEGFA|KMT2C	-8.90339	0	13	0	0	-12.4213	30.7452
0	1	1	0	0	1	0	-5.98373	-4.53174	0	0	-7.0883	GO:0009611	M011001	3	0	GO Biological Processes	19	response to wounding	19_GO:0050896 response to stimulus	-8.15119	5.83335	8.33988	30284	448	197	17	8.62944	2.00061	667|928|960|1265|1281|1289|1291|1524|1832|2064|2316|4313|5290|6385|6790|7076|7422	DST|CD9|CD44|CNN2|COL3A1|COL5A1|COL6A1|CX3CR1|DSP|ERBB2|FLNA|MMP2|PIK3CA|SDC4|AURKA|TIMP1|VEGFA	-5.89049	0	44	1	1	-8.15119	41.8673
0	1	1	0	0	1	0	-5.81257	-9.32526	0	0	-4.69466	WP5158	M011001	3	0	WikiPathways	27	Urotensin II mediated signaling		-9.32526	64.2291	19.3602	30284	69	41	6	14.6341	5.51993	59|1277|1281|1956|4313|5728	ACTA2|COL1A1|COL3A1|EGFR|MMP2|PTEN	-7.11725	0	14	0	0	-11.9972	246.211
0	1	1	0	0	1	0	-5.79297	-5.56518	0	0	-6.98431	GO:0071560	M011001	3	0	GO Biological Processes	19	cellular response to transforming growth factor beta stimulus	19_GO:0050896 response to stimulus	-6.98431	18.5791	10.8318	30284	163	70	7	10	3.58569	59|857|1277|1278|1524|6422|9404	ACTA2|CAV1|COL1A1|COL1A2|CX3CR1|SFRP1|LPXN	-5.09535	0	66	1	1	-6.98431	87.695
0	1	1	0	0	1	0	-5.70322	-5.47577	0	0	-6.85966	GO:0071559	M011001	3	0	GO Biological Processes	19	response to transforming growth factor beta	19_GO:0050896 response to stimulus	-6.85966	17.8141	10.5818	30284	170	70	7	10	3.58569	59|857|1277|1278|1524|6422|9404	ACTA2|CAV1|COL1A1|COL1A2|CX3CR1|SFRP1|LPXN	-4.99474	0	66	0	0	-6.98431	87.695
0	1	1	0	0	1	0	-5.65933	-3.38832	0	0	-6.07874	GO:0009617	M011001	3	0	GO Biological Processes	19	response to bacterium	19_GO:0044419 biological process involved in interspecies interaction between organisms	-8.59149	4.65836	8.07347	30284	726	197	22	11.1675	2.24404	857|920|929|942|968|999|1291|1524|2207|2706|4069|5914|6279|7431|8754|10221|57162|57402|84868|132299|151887|100133941	CAV1|CD4|CD14|CD86|CD68|CDH1|COL6A1|CX3CR1|FCER1G|GJB2|LYZ|RARA|S100A8|VIM|ADAM9|TRIB1|PELI1|S100A14|HAVCR2|OCIAD2|CCDC80|CD24	-6.22008	0	34	1	1	-8.59149	192.279
0	1	0	0	0	1	0	-5.65776	0	0	0	-6.81805	R-HSA-114604	M010001	2	0	Reactome Gene Sets	6	GPVI-mediated activation cascade		-6.81805	82.4054	17.9619	30284	21	70	4	5.71429	2.77431	1277|1278|2207|5290	COL1A1|COL1A2|FCER1G|PIK3CA	-4.95976	0	4	0	0	-18.8935	204.622
0	1	1	0	0	1	0	-5.59445	-5.45793	0	0	-4.75331	R-HSA-3000170	M011001	3	0	Reactome Gene Sets	6	Syndecan interactions		-6.57437	34.9377	12.8851	30284	22	197	5	2.53807	1.12056	1277|1278|1289|3655|6385	COL1A1|COL1A2|COL5A1|ITGA6|SDC4	-4.6041	0	4	0	0	-18.8935	204.622
0	1	1	0	0	1	0	-5.53412	-5.39765	0	0	-4.69334	R-HSA-8874081	M011001	3	0	Reactome Gene Sets	6	MET activates PTK2 signaling		-5.53412	106.759	17.7459	30284	23	37	3	8.10811	4.48743	1277|1278|1289	COL1A1|COL1A2|COL5A1	-3.89564	0	4	0	0	-18.8935	204.622
0	1	1	0	0	1	0	-5.42782	-7.72487	0	0	-4.80264	GO:0070482	M011001	3	0	GO Biological Processes	19	response to oxygen levels	19_GO:0050896 response to stimulus	-8.89851	7.08823	9.22985	30284	347	197	16	8.12183	1.94626	360|857|1277|1291|4193|4313|5468|6387|6422|6659|7037|7422|7852|9839|10631|100133941	AQP3|CAV1|COL1A1|COL6A1|MDM2|MMP2|PPARG|CXCL12|SFRP1|SOX4|TFRC|VEGFA|CXCR4|ZEB2|POSTN|CD24	-6.46988	0	33	1	1	-8.89851	7.22849
0	1	0	0	0	1	0	-5.40864	0	0	0	-5.73994	R-HSA-6785807	M010001	2	0	Reactome Gene Sets	6	Interleukin-4 and Interleukin-13 signaling		-5.77792	12.3687	8.59278	30284	87	197	7	3.5533	1.31894	595|1278|2625|3687|4313|7076|7431	CCND1|COL1A2|GATA3|ITGAX|MMP2|TIMP1|VIM	-3.93693	0	32	0	0	-8.9187	35.078
0	1	1	1	0	1	0	-5.4006	-4.09083	-5.4421	0	-10.6025	GO:0071345	M011101	4	0	GO Biological Processes	19	cellular response to cytokine stimulus	19_GO:0050896 response to stimulus	-15.0324	6.05528	11.6275	30284	787	197	31	15.736	2.59439	199|857|920|960|1277|1491|1524|1613|1956|2064|2194|2207|2264|2296|2317|2597|2625|3561|3856|3875|4311|4313|4332|4605|6387|6422|7037|7431|7852|10631|92610	AIF1|CAV1|CD4|CD44|COL1A1|CTH|CX3CR1|DAPK3|EGFR|ERBB2|FASN|FCER1G|FGFR4|FOXC1|FLNB|GAPDH|GATA3|IL2RG|KRT8|KRT18|MME|MMP2|MNDA|MYBL2|CXCL12|SFRP1|TFRC|VIM|CXCR4|POSTN|TIFA	-11.5976	0	9	1	1	-15.0324	6.05528
0	1	1	0	0	1	0	-5.36922	-3.61756	0	0	-5.69098	hsa04512	M011001	3	0	KEGG Pathway	24	ECM-receptor interaction		-5.7111	12.0908	8.47878	30284	89	197	7	3.5533	1.31894	960|1277|1278|1282|1291|3655|6385	CD44|COL1A1|COL1A2|COL4A1|COL6A1|ITGA6|SDC4	-3.89361	0	4	0	0	-18.8935	204.622
0	1	1	1	0	1	0	-5.36852	-8.0528	-2.11894	0	-9.05722	WP306	M011101	4	0	WikiPathways	27	Focal adhesion		-10.233	10.8149	11.2404	30284	199	197	14	7.1066	1.83059	595|857|1277|1278|1282|1956|2064|2316|2317|3655|4638|5290|5728|7422	CCND1|CAV1|COL1A1|COL1A2|COL4A1|EGFR|ERBB2|FLNA|FLNB|ITGA6|MYLK|PIK3CA|PTEN|VEGFA	-7.56754	0	13	0	0	-12.4213	30.7452
0	1	1	1	0	1	0	-5.3579	-2.59956	-3.14402	0	-9.03802	M5915	M011101	4	0	Hallmark Gene Sets	23	HALLMARK APICAL JUNCTION		-10.204	10.7608	11.2067	30284	200	197	14	7.1066	1.83059	72|942|999|1001|1265|1956|2886|3728|4313|5175|5728|5788|7070|8754	ACTG2|CD86|CDH1|CDH3|CNN2|EGFR|GRB7|JUP|MMP2|PECAM1|PTEN|PTPRC|THY1|ADAM9	-7.56754	0	21	1	1	-10.204	10.7608
0	1	1	0	0	1	0	-5.3579	-2.59956	0	0	-6.38109	M5950	M011001	3	0	Hallmark Gene Sets	23	HALLMARK ALLOGRAFT REJECTION		-7.0514	8.45492	8.55921	30284	200	197	11	5.58376	1.63589	920|942|1956|2316|3561|5788|7070|7076|7163|7453|10261	CD4|CD86|EGFR|FLNA|IL2RG|PTPRC|THY1|TIMP1|TPD52|WARS1|IGSF6	-4.99161	0	59	0	0	-7.35029	23.1765
0	1	0	0	0	1	0	-5.3579	0	0	0	-2.9193	M5953	M010001	2	0	Hallmark Gene Sets	23	HALLMARK KRAS SIGNALING UP		-5.3579	20.4622	9.65823	30284	200	37	5	13.5135	5.62027	2207|4320|5175|8404|10221	FCER1G|MMP11|PECAM1|SPARCL1|TRIB1	-3.75183	0	103	1	1	-5.3579	20.4622
0	1	1	1	0	1	0	-5.316	-7.97836	-2.08952	0	-7.61281	hsa05205	M011101	4	0	KEGG Pathway	24	Proteoglycans in cancer		-11.2025	11.3034	11.9481	30284	204	197	15	7.61421	1.88965	595|857|960|1277|1278|1956|2017|2064|2316|4060|4193|4313|5290|6385|7422	CCND1|CAV1|CD44|COL1A1|COL1A2|EGFR|CTTN|ERBB2|FLNA|LUM|MDM2|MMP2|PIK3CA|SDC4|VEGFA	-8.35396	0	13	0	0	-12.4213	30.7452
0	1	1	0	0	1	0	-5.26882	-5.13256	0	0	-4.42981	WP5036	M011001	3	0	WikiPathways	27	Angiotensin II receptor type 1 pathway		-5.26882	87.695	16.0519	30284	28	37	3	8.10811	4.48743	59|1277|1278	ACTA2|COL1A1|COL1A2	-3.67467	0	66	0	0	-6.98431	87.695
0	1	0	0	0	1	0	-5.19557	0	0	0	-8.9187	R-HSA-449147	M010001	2	0	Reactome Gene Sets	6	Signaling by Interleukins		-8.9187	12.4906	10.864	30284	381	70	11	15.7143	4.34986	595|920|942|1265|1278|3687|4313|5290|7431|84868|92610	CCND1|CD4|CD86|CNN2|COL1A2|ITGAX|MMP2|PIK3CA|VIM|HAVCR2|TIFA	-6.75274	0	32	1	1	-8.9187	35.078
0	1	1	0	0	1	0	-5.17637	-5.0402	0	0	-6.1641	WP453	M011001	3	0	WikiPathways	27	Inflammatory response pathway		-6.1641	57.6838	14.9511	30284	30	70	4	5.71429	2.77431	942|1277|1278|3561	CD86|COL1A1|COL1A2|IL2RG	-4.41312	0	4	0	0	-18.8935	204.622
0	1	0	0	0	0	0	-5.17637	0	0	0	0	WP129	M010000	1	0	WikiPathways	27	Matrix metalloproteinases		-5.17637	81.8486	15.4953	30284	30	37	3	8.10811	4.48743	4313|4320|7076	MMP2|MMP11|TIMP1	-3.59458	0	20	0	0	-10.208	81.8486
0	1	1	0	0	0	0	-5.13254	-4.9964	0	0	0	GO:0085029	M011000	2	0	GO Biological Processes	19	extracellular matrix assembly	19_GO:0009987 cellular process	-5.13254	79.2084	15.2373	30284	31	37	3	8.10811	4.48743	1278|1281|1291	COL1A2|COL3A1|COL6A1	-3.55956	0	4	0	0	-18.8935	204.622
0	1	1	0	0	1	0	-5.13254	-4.9964	0	0	-4.29458	R-HSA-8875878	M011001	3	0	Reactome Gene Sets	6	MET promotes cell motility		-5.13254	79.2084	15.2373	30284	31	37	3	8.10811	4.48743	1277|1278|1289	COL1A1|COL1A2|COL5A1	-3.55956	0	4	0	0	-18.8935	204.622
0	1	1	1	0	1	0	-5.11864	-4.89376	-2.96132	0	-3.76115	GO:0010810	M011101	4	0	GO Biological Processes	19	regulation of cell-substrate adhesion	19_GO:0050789 regulation of biological process	-8.51617	8.92159	9.62909	30284	224	197	13	6.59898	1.76881	1277|1613|2316|3655|3728|4070|5728|6385|6422|7070|7422|10631|151887	COL1A1|DAPK3|FLNA|ITGA6|JUP|TACSTD2|PTEN|SDC4|SFRP1|THY1|VEGFA|POSTN|CCDC80	-6.16569	0	37	1	1	-8.51617	22.3773
0	1	1	0	0	1	0	-5.11665	-3.4309	0	0	-6.83315	hsa05146	M011001	3	0	KEGG Pathway	24	Amoebiasis		-6.83315	25.2017	11.8424	30284	103	70	6	8.57143	3.34594	929|1277|1278|1282|5272|5290	CD14|COL1A1|COL1A2|COL4A1|SERPINB9|PIK3CA	-4.96989	0	4	0	0	-18.8935	204.622
0	1	0	0	0	0	0	-5.09015	0	0	0	0	R-HSA-1592389	M010000	1	0	Reactome Gene Sets	6	Activation of Matrix Metalloproteinases		-5.09015	76.7331	14.9914	30284	32	37	3	8.10811	4.48743	4313|4320|7076	MMP2|MMP11|TIMP1	-3.52458	0	20	0	0	-10.208	81.8486
0	1	1	0	0	1	0	-5.035	-3.37058	0	0	-6.71053	WP5353	M011001	3	0	WikiPathways	27	Macrophage stimulating protein MSP signaling		-6.71053	24.0349	11.5428	30284	108	70	6	8.57143	3.34594	59|1282|5728|6591|7431|9839	ACTA2|COL4A1|PTEN|SNAI2|VIM|ZEB2	-4.862	0	64	0	0	-7.00259	41.2027
0	1	1	0	0	1	0	-5.01494	-5.7621	0	0	-6.69284	GO:0007167	M011001	3	0	GO Biological Processes	19	enzyme-linked receptor protein signaling pathway	19_GO:0050896 response to stimulus	-8.19642	4.88795	7.97333	30284	629	197	20	10.1523	2.1518	367|920|1277|1278|1281|1282|1291|1956|2064|2264|2296|2886|4313|5290|5468|5764|6422|7422|8754|9404	AR|CD4|COL1A1|COL1A2|COL3A1|COL4A1|COL6A1|EGFR|ERBB2|FGFR4|FOXC1|GRB7|MMP2|PIK3CA|PPARG|PTN|SFRP1|VEGFA|ADAM9|LPXN	-5.92512	0	18	0	0	-10.308	34.7593
0	1	0	0	0	1	0	-5.00937	0	0	0	-4.17248	R-HSA-419037	M010001	2	0	Reactome Gene Sets	6	NCAM1 interactions		-5.00937	72.2194	14.5323	30284	34	37	3	8.10811	4.48743	1282|1289|1291	COL4A1|COL5A1|COL6A1	-3.45457	0	4	0	0	-18.8935	204.622
0	1	1	0	0	1	0	-4.98787	-3.33578	0	0	-6.63981	GO:0048771	M011001	3	0	GO Biological Processes	19	tissue remodeling	19_GO:0032501 multicellular organismal process	-6.63981	23.3853	11.3726	30284	111	70	6	8.57143	3.34594	857|1291|2296|2316|4313|5764	CAV1|COL6A1|FOXC1|FLNA|MMP2|PTN	-4.80707	0	71	1	1	-6.63981	23.3853
0	1	0	0	0	1	0	-4.97082	0	0	0	-4.13428	M16801	M010001	2	0	Canonical Pathways	11	SIG REGULATION OF THE ACTIN CYTOSKELETON BY RHO GTPASES		-4.97082	70.156	14.3175	30284	35	37	3	8.10811	4.48743	72|2316|4638	ACTG2|FLNA|MYLK	-3.42572	0	113	1	1	-4.97082	70.156
0	1	1	0	0	1	0	-4.96492	-2.3721	0	0	-8.32787	GO:0050900	M011001	3	0	GO Biological Processes	19	leukocyte migration	19_GO:0002376 immune system process	-9.13593	8.93013	10.0014	30284	241	197	14	7.1066	1.83059	1265|1524|1880|2207|2625|3655|4313|5175|5764|6279|6387|7422|7852|58191	CNN2|CX3CR1|GPR183|FCER1G|GATA3|ITGA6|MMP2|PECAM1|PTN|S100A8|CXCL12|VEGFA|CXCR4|CXCL16	-6.6942	0	29	1	1	-9.13593	22.3773
0	1	0	0	0	1	0	-4.92705	0	0	0	-6.54859	GO:0071674	M010001	2	0	GO Biological Processes	19	mononuclear cell migration	19_GO:0002376 immune system process	-6.54859	22.5719	11.1558	30284	115	70	6	8.57143	3.34594	1265|1880|4313|5175|7852|58191	CNN2|GPR183|MMP2|PECAM1|CXCR4|CXCL16	-4.72658	0	72	1	1	-6.54859	24.992
0	1	0	0	0	1	0	-4.91219	0	0	0	-9.5513	R-HSA-202733	M010001	2	0	Reactome Gene Sets	6	Cell surface interactions at the vascular wall		-9.5513	29.8365	14.9776	30284	116	70	8	11.4286	3.80272	857|960|1277|1278|2207|3687|5175|5290	CAV1|CD44|COL1A1|COL1A2|FCER1G|ITGAX|PECAM1|PIK3CA	-7.29599	0	26	1	1	-9.5513	29.8365
0	1	0	0	0	1	0	-4.91219	0	0	0	-5.12487	hsa04670	M010001	2	0	KEGG Pathway	24	Leukocyte transendothelial migration		-5.12487	18.6478	9.16622	30284	116	70	5	7.14286	3.07818	4313|5175|5290|7070|7852	MMP2|PECAM1|PIK3CA|THY1|CXCR4	-3.55425	0	52	0	0	-7.88213	41.8673
0	1	1	0	0	1	0	-4.90282	-4.6371	0	0	-5.17669	GO:0008015	M011001	3	0	GO Biological Processes	19	blood circulation	19_GO:0032501 multicellular organismal process	-6.01807	5.0167	6.78004	30284	429	197	14	7.1066	1.83059	59|367|857|1278|1956|2296|4313|5290|5468|6387|7422|7852|9839|10631	ACTA2|AR|CAV1|COL1A2|EGFR|FOXC1|MMP2|PIK3CA|PPARG|CXCL12|VEGFA|CXCR4|ZEB2|POSTN	-4.1326	0	33	0	0	-8.89851	7.22849
0	1	1	0	0	0	0	-4.89139	-3.55228	0	0	0	GO:0043434	M011000	2	0	GO Biological Processes	19	response to peptide hormone	19_GO:0050896 response to stimulus	-5.99427	4.99342	6.75666	30284	431	197	14	7.1066	1.83059	857|990|1277|1281|1291|1956|2064|2264|2706|4193|5290|5468|6387|7076	CAV1|CDC6|COL1A1|COL3A1|COL6A1|EGFR|ERBB2|FGFR4|GJB2|MDM2|PIK3CA|PPARG|CXCL12|TIMP1	-4.11058	0	18	0	0	-10.308	34.7593
0	1	0	0	0	1	0	-4.86169	0	0	0	-4.02621	R-HSA-445355	M010001	2	0	Reactome Gene Sets	6	Smooth Muscle Contraction		-4.86169	64.6174	13.7244	30284	38	37	3	8.10811	4.48743	59|72|4638	ACTA2|ACTG2|MYLK	-3.33767	0	113	0	0	-4.97082	70.156
0	1	1	0	0	1	0	-4.85405	-6.22146	0	0	-2.56265	GO:0032355	M011001	3	0	GO Biological Processes	19	response to estradiol	19_GO:0050896 response to stimulus	-6.22146	30.7764	12.0337	30284	120	41	5	12.1951	5.11047	1277|1956|4313|5914|10631	COL1A1|EGFR|MMP2|RARA|POSTN	-4.45876	0	14	0	0	-11.9972	246.211
0	1	1	0	0	1	0	-4.83511	-4.56998	0	0	-6.09432	GO:0048514	M011001	3	0	GO Biological Processes	19	blood vessel morphogenesis	19_GO:0032502 developmental process	-6.09432	8.82915	7.97182	30284	441	70	9	12.8571	4.00073	857|1282|2296|2316|4313|4638|5290|7070|22918	CAV1|COL4A1|FOXC1|FLNA|MMP2|MYLK|PIK3CA|THY1|CD93	-4.3535	0	1	0	0	-27.2132	69.5714
0	1	1	0	0	1	0	-4.73933	-6.52138	0	0	-8.21106	GO:0035239	M011001	3	0	GO Biological Processes	19	tube morphogenesis	19_GO:0032502 developmental process	-10.5002	5.31617	9.30784	30284	694	197	24	12.1827	2.33039	367|857|1281|1282|1956|2296|2316|2625|4070|4313|4638|5290|5914|6385|6422|6659|6678|7070|7422|7453|7852|8626|9968|22918	AR|CAV1|COL3A1|COL4A1|EGFR|FOXC1|FLNA|GATA3|TACSTD2|MMP2|MYLK|PIK3CA|RARA|SDC4|SFRP1|SOX4|SPARC|THY1|VEGFA|WARS1|CXCR4|TP63|MED12|CD93	-7.74187	0	10	0	0	-14.8714	61.8041
0	1	0	0	0	1	0	-4.72934	0	0	0	-5.56207	GO:0090130	M010001	2	0	GO Biological Processes	19	tissue migration	19_GO:0032501 multicellular organismal process	-5.56207	41.2027	12.5493	30284	42	70	4	5.71429	2.77431	59|72|6591|9839	ACTA2|ACTG2|SNAI2|ZEB2	-3.91966	0	64	0	0	-7.00259	41.2027
0	1	0	0	0	1	0	-4.70399	0	0	0	-3.60941	GO:0010977	M010001	2	0	GO Biological Processes	19	negative regulation of neuron projection development	19_GO:0032502 developmental process	-4.70399	24.992	9.62488	30284	131	37	4	10.8108	5.10487	2316|7070|7431|81618	FLNA|THY1|VIM|ITM2C	-3.20007	0	35	0	0	-8.54798	24.992
0	1	1	0	0	1	0	-4.70399	-3.12626	0	0	-3.60941	GO:0097529	M011001	3	0	GO Biological Processes	19	myeloid leukocyte migration	19_GO:0002376 immune system process	-4.70399	24.992	9.62488	30284	131	37	4	10.8108	5.10487	1265|2207|4313|5175	CNN2|FCER1G|MMP2|PECAM1	-3.20007	0	72	0	0	-6.54859	24.992
0	1	0	0	0	1	0	-4.6384	0	0	0	-5.44011	R-HSA-186797	M010001	2	0	Reactome Gene Sets	6	Signaling by PDGF		-5.44011	38.4559	12.1028	30284	45	70	4	5.71429	2.77431	1282|1289|1291|5290	COL4A1|COL5A1|COL6A1|PIK3CA	-3.81632	0	4	0	0	-18.8935	204.622
0	1	1	0	0	1	0	-4.53362	-3.26203	0	0	-8.80358	GO:0045785	M011001	3	0	GO Biological Processes	19	positive regulation of cell adhesion	19_GO:0048518 positive regulation of biological process	-14.493	7.7017	12.2146	30284	499	197	25	12.6904	2.37156	199|857|920|942|960|2064|2316|2625|3561|3655|3728|5290|5788|5914|6385|6387|6422|6659|7037|7070|7422|8754|84868|151887|100133941	AIF1|CAV1|CD4|CD86|CD44|ERBB2|FLNA|GATA3|IL2RG|ITGA6|JUP|PIK3CA|PTPRC|RARA|SDC4|CXCL12|SFRP1|SOX4|TFRC|THY1|VEGFA|ADAM9|HAVCR2|CCDC80|CD24	-11.2545	0	11	1	1	-14.493	14.3474
0	1	1	1	0	1	0	-4.50903	-3.30148	-3.10605	0	-13.1162	GO:0001775	M011101	4	0	GO Biological Processes	19	cell activation	19_GO:0032501 multicellular organismal process	-17.3513	6.72806	12.8886	30284	754	197	33	16.7513	2.6606	199|712|920|928|942|960|1281|1524|1880|1956|2064|2205|2207|2214|2316|2625|3561|4193|5290|5788|6097|6659|7163|8754|9156|9839|10875|22918|25800|56892|57162|84868|100133941	AIF1|C1QA|CD4|CD9|CD86|CD44|COL3A1|CX3CR1|GPR183|EGFR|ERBB2|FCER1A|FCER1G|FCGR3A|FLNA|GATA3|IL2RG|MDM2|PIK3CA|PTPRC|RORC|SOX4|TPD52|ADAM9|EXO1|ZEB2|FGL2|CD93|SLC39A6|TCIM|PELI1|HAVCR2|CD24	-13.5485	0	6	1	1	-17.3513	8.35467
0	1	1	0	0	0	0	-4.49995	-8.14532	0	0	0	WP5373	M011000	2	0	WikiPathways	27	Osteoarthritic chondrocyte hypertrophy		-8.14532	73.8634	18.9857	30284	50	41	5	12.1951	5.11047	1277|1281|1300|2264|7422	COL1A1|COL3A1|COL10A1|FGFR4|VEGFA	-6.08027	0	42	0	0	-8.2443	181.886
0	1	1	0	0	1	0	-4.4878	-8.18251	0	0	-6.29687	WP3932	M011001	3	0	WikiPathways	27	Focal adhesion PI3K Akt mTOR signaling		-8.79268	7.61019	9.35741	30284	303	197	15	7.61421	1.88965	1277|1278|1281|1282|1289|1956|1978|2264|3561|3655|3687|4193|5290|5728|7422	COL1A1|COL1A2|COL3A1|COL4A1|COL5A1|EGFR|EIF4EBP1|FGFR4|IL2RG|ITGA6|ITGAX|MDM2|PIK3CA|PTEN|VEGFA	-6.38785	0	13	0	0	-12.4213	30.7452
0	1	0	0	0	1	0	-4.47399	0	0	0	-3.64311	R-HSA-375165	M010001	2	0	Reactome Gene Sets	6	NCAM signaling for neurite out-growth		-4.47399	48.1463	11.7856	30284	51	37	3	8.10811	4.48743	1282|1289|1291	COL4A1|COL5A1|COL6A1	-3.00967	0	4	0	0	-18.8935	204.622
0	1	0	0	0	1	0	-4.44724	0	0	0	-5.12845	GO:0030100	M010001	2	0	GO Biological Processes	19	regulation of endocytosis	19_GO:0051179 localization	-5.19627	5.47244	6.39422	30284	309	197	11	5.58376	1.63589	341|857|929|1265|2207|3561|4193|4638|5788|6424|7422	APOC1|CAV1|CD14|CNN2|FCER1G|IL2RG|MDM2|MYLK|PTPRC|SFRP4|VEGFA	-3.48575	0	109	1	1	-5.19627	5.47244
0	1	1	0	0	1	0	-4.43837	-5.24716	0	0	-4.58141	GO:0003013	M011001	3	0	GO Biological Processes	19	circulatory system process	19_GO:0032501 multicellular organismal process	-6.47316	4.73914	6.95258	30284	519	197	16	8.12183	1.94626	59|367|857|1278|1956|2296|4313|5290|5468|6387|7037|7422|7852|8884|9839|10631	ACTA2|AR|CAV1|COL1A2|EGFR|FOXC1|MMP2|PIK3CA|PPARG|CXCL12|TFRC|VEGFA|CXCR4|SLC5A6|ZEB2|POSTN	-4.52368	0	33	0	0	-8.89851	7.22849
0	1	1	0	0	1	0	-4.38146	-6.65209	0	0	-4.0133	GO:0036293	M011001	3	0	GO Biological Processes	19	response to decreased oxygen levels	19_GO:0050896 response to stimulus	-8.48902	7.22849	9.04928	30284	319	197	15	7.61421	1.88965	360|857|1291|4193|4313|5468|6387|6422|6659|7037|7422|7852|9839|10631|100133941	AQP3|CAV1|COL6A1|MDM2|MMP2|PPARG|CXCL12|SFRP1|SOX4|TFRC|VEGFA|CXCR4|ZEB2|POSTN|CD24	-6.14363	0	33	0	0	-8.89851	7.22849
0	1	0	0	0	1	0	-4.36501	0	0	0	-5.40723	R-HSA-109582	M010001	2	0	Reactome Gene Sets	6	Hemostasis		-7.03289	4.88475	7.33579	30284	535	197	17	8.62944	2.00061	857|928|960|1277|1278|2207|2625|3655|3687|4072|5175|5290|6385|6678|7076|7277|11004	CAV1|CD9|CD44|COL1A1|COL1A2|FCER1G|GATA3|ITGA6|ITGAX|EPCAM|PECAM1|PIK3CA|SDC4|SPARC|TIMP1|TUBA4A|KIF2C	-4.97571	0	26	0	0	-9.5513	29.8365
0	1	1	0	0	1	0	-4.3639	-4.1854	0	0	-3.28018	GO:0031099	M011001	3	0	GO Biological Processes	19	regeneration	19_GO:0032502 developmental process	-6.97718	9.60787	8.83369	30284	160	197	10	5.07614	1.56394	595|928|1291|1956|4313|5764|6387|6790|7298|10631	CCND1|CD9|COL6A1|EGFR|MMP2|PTN|CXCL12|AURKA|TYMS|POSTN	-4.93784	0	67	1	1	-6.97718	16.5058
0	1	0	1	0	1	0	-4.34288	0	-2.36566	0	-7.00259	WP4239	M010101	3	0	WikiPathways	27	Epithelial to mesenchymal transition in colorectal cancer		-7.00259	18.6938	10.8688	30284	162	70	7	10	3.58569	1282|1832|4313|5290|6591|6678|9839	COL4A1|DSP|MMP2|PIK3CA|SNAI2|SPARC|ZEB2	-5.11186	0	64	1	1	-7.00259	41.2027
0	1	1	0	0	1	0	-4.32412	-4.10418	0	0	-6.03813	GO:0071214	M011001	3	0	GO Biological Processes	19	cellular response to abiotic stimulus	19_GO:0050896 response to stimulus	-6.03813	10.5519	8.37201	30284	328	70	8	11.4286	3.80272	1265|1277|4313|4638|5290|5728|6422|6591	CNN2|COL1A1|MMP2|MYLK|PIK3CA|PTEN|SFRP1|SNAI2	-4.30601	0	71	0	0	-6.63981	23.3853
0	1	1	0	0	1	0	-4.32412	-4.10418	0	0	-6.03813	GO:0104004	M011001	3	0	GO Biological Processes	19	cellular response to environmental stimulus	19_GO:0050896 response to stimulus	-6.03813	10.5519	8.37201	30284	328	70	8	11.4286	3.80272	1265|1277|4313|4638|5290|5728|6422|6591	CNN2|COL1A1|MMP2|MYLK|PIK3CA|PTEN|SFRP1|SNAI2	-4.30601	0	71	0	0	-6.63981	23.3853
0	1	1	0	0	1	0	-4.28066	-2.96716	0	0	-4.90109	GO:0042060	M011001	3	0	GO Biological Processes	19	wound healing	19_GO:0050896 response to stimulus	-6.46484	5.96548	7.39496	30284	335	197	13	6.59898	1.76881	667|928|960|1265|1281|1289|1832|2064|2316|5290|6385|7076|7422	DST|CD9|CD44|CNN2|COL3A1|COL5A1|DSP|ERBB2|FLNA|PIK3CA|SDC4|TIMP1|VEGFA	-4.51859	0	44	0	0	-8.15119	41.8673
0	1	1	0	0	1	0	-4.26158	-4.12669	0	0	-4.93653	R-HSA-6806834	M011001	3	0	Reactome Gene Sets	6	Signaling by MET		-4.93653	28.8419	10.3907	30284	60	70	4	5.71429	2.77431	1277|1278|1289|5290	COL1A1|COL1A2|COL5A1|PIK3CA	-3.39621	0	4	0	0	-18.8935	204.622
0	1	1	0	0	1	0	-4.25626	-2.94814	0	0	-4.86785	GO:0032496	M011001	3	0	GO Biological Processes	19	response to lipopolysaccharide	19_GO:0044419 biological process involved in interspecies interaction between organisms	-7.25342	6.34856	8.01342	30284	339	197	14	7.1066	1.83059	929|942|968|1291|1524|2706|5914|6279|7431|8754|10221|57162|57402|84868	CD14|CD86|CD68|COL6A1|CX3CR1|GJB2|RARA|S100A8|VIM|ADAM9|TRIB1|PELI1|S100A14|HAVCR2	-5.16385	0	34	0	0	-8.59149	192.279
0	1	0	0	0	1	0	-4.23794	0	0	0	-10.4177	GO:0002683	M010001	2	0	GO Biological Processes	19	negative regulation of immune system process	19_GO:0002376 immune system process	-10.6496	5.9964	9.69205	30284	564	197	22	11.1675	2.24404	714|942|968|1265|1281|1524|2064|4332|5272|5468|5788|5914|6385|6387|6422|6591|7070|9404|10221|10875|57162|84868	C1QC|CD86|CD68|CNN2|COL3A1|CX3CR1|ERBB2|MNDA|SERPINB9|PPARG|PTPRC|RARA|SDC4|CXCL12|SFRP1|SNAI2|THY1|LPXN|TRIB1|FGL2|PELI1|HAVCR2	-7.86105	0	11	0	0	-14.493	14.3474
0	1	0	1	0	1	0	-4.22944	0	-3.85435	0	-8.19212	GO:0034330	M010101	3	0	GO Biological Processes	19	cell junction organization	19_GO:0009987 cellular process	-9.78531	5.70361	9.14056	30284	566	197	21	10.6599	2.1987	667|712|714|928|999|1001|1282|1524|1832|2017|2064|2316|2706|3655|3728|5175|5728|6591|7070|8404|11004	DST|C1QA|C1QC|CD9|CDH1|CDH3|COL4A1|CX3CR1|DSP|CTTN|ERBB2|FLNA|GJB2|ITGA6|JUP|PECAM1|PTEN|SNAI2|THY1|SPARCL1|KIF2C	-7.21928	0	21	0	0	-10.204	10.7608
0	1	1	0	0	1	0	-4.21249	-4.03467	0	0	-3.13437	GO:0051216	M011001	3	0	GO Biological Processes	19	cartilage development	19_GO:0032502 developmental process	-5.62702	7.9059	7.41369	30284	175	197	9	4.56853	1.48765	960|1277|1281|1291|2625|5914|6591|7076|7298	CD44|COL1A1|COL3A1|COL6A1|GATA3|RARA|SNAI2|TIMP1|TYMS	-3.82569	0	25	0	0	-9.74314	9.22355
0	1	0	0	0	1	0	-4.17756	0	0	0	-6.40748	M28	M010001	2	0	Canonical Pathways	11	PID IL4 2PATHWAY		-6.69657	16.8138	10.2476	30284	64	197	7	3.5533	1.31894	1277|1278|3159|3561|5290|7033|7070	COL1A1|COL1A2|HMGA1|IL2RG|PIK3CA|TFF3|THY1	-4.70671	0	4	0	0	-18.8935	204.622
0	1	1	0	0	1	0	-4.17324	-3.95448	0	0	-2.041	WP2005	M011001	3	0	WikiPathways	27	miR targeted genes in muscle cell		-4.65785	4.79033	5.79624	30284	353	197	11	5.58376	1.63589	595|1277|1278|1281|1956|2064|3159|6387|6678|7298|10802	CCND1|COL1A1|COL1A2|COL3A1|EGFR|ERBB2|HMGA1|CXCL12|SPARC|TYMS|SEC24A	-3.02533	0	42	0	0	-8.2443	181.886
0	1	0	1	0	1	0	-4.1557	0	-2.23203	0	-3.07982	R-HSA-397014	M010101	3	0	Reactome Gene Sets	6	Muscle contraction		-4.1557	18.0881	8.06468	30284	181	37	4	10.8108	5.10487	59|72|4638|7431	ACTA2|ACTG2|MYLK|VIM	-2.75547	0	113	0	0	-4.97082	70.156
0	1	0	0	1	1	0	-4.15031	0	0	-2.39396	-2.63201	R-HSA-5653656	M010011	3	0	Reactome Gene Sets	6	Vesicle-mediated transport		-4.15031	8.39473	6.31668	30284	585	37	6	16.2162	6.05974	920|1277|1278|1282|2706|6678	CD4|COL1A1|COL1A2|COL4A1|GJB2|SPARC	-2.75123	0	4	0	0	-18.8935	204.622
0	1	1	0	0	1	0	-4.12736	-3.90899	0	0	-4.69244	GO:0002237	M011001	3	0	GO Biological Processes	19	response to molecule of bacterial origin	19_GO:0044419 biological process involved in interspecies interaction between organisms	-7.76947	6.3875	8.33262	30284	361	197	15	7.61421	1.88965	929|942|968|1291|1524|2706|5914|6279|7431|8754|10221|57162|57402|84868|100133941	CD14|CD86|CD68|COL6A1|CX3CR1|GJB2|RARA|S100A8|VIM|ADAM9|TRIB1|PELI1|S100A14|HAVCR2|CD24	-5.59338	0	34	0	0	-8.59149	192.279
0	1	1	0	0	1	0	-4.11044	-2.83457	0	0	-6.79101	GO:0040011	M011001	3	0	GO Biological Processes	19	locomotion	19_GO:0040011 locomotion	-6.79101	10.6969	8.95871	30284	364	70	9	12.8571	4.00073	1291|1524|1880|2207|4313|5764|6275|7852|58191	COL6A1|CX3CR1|GPR183|FCER1G|MMP2|PTN|S100A4|CXCR4|CXCL16	-4.936	0	29	0	0	-9.13593	22.3773
0	1	0	1	0	1	0	-4.09188	0	-2.18664	0	-3.01862	GO:0031345	M010101	3	0	GO Biological Processes	19	negative regulation of cell projection organization	19_GO:0048519 negative regulation of biological process	-4.46717	6.54153	6.16733	30284	188	197	8	4.06091	1.4063	999|2316|4070|4193|5728|7070|7431|81618	CDH1|FLNA|TACSTD2|MDM2|PTEN|THY1|VIM|ITM2C	-2.86397	0	35	0	0	-8.54798	24.992
0	1	1	0	0	1	0	-4.0543	-3.79739	0	0	-2.54554	GO:0007423	M011001	3	0	GO Biological Processes	19	sensory organ development	19_GO:0032502 developmental process	-4.92041	3.78635	5.62073	30284	609	197	15	7.61421	1.88965	220|1282|1289|1956|2296|2625|2706|5914|6385|6659|6678|7020|7070|7422|7431	ALDH1A3|COL4A1|COL5A1|EGFR|FOXC1|GATA3|GJB2|RARA|SDC4|SOX4|SPARC|TFAP2A|THY1|VEGFA|VIM	-3.25011	0	93	0	0	-5.78668	5.55636
0	1	1	0	0	0	0	-4.04965	-2.78728	0	0	0	GO:0006979	M011000	2	0	GO Biological Processes	19	response to oxidative stress	19_GO:0050896 response to stimulus	-4.04965	10.9132	6.75594	30284	375	37	5	13.5135	5.62027	199|1277|1291|2706|4313	AIF1|COL1A1|COL6A1|GJB2|MMP2	-2.67067	0	14	0	0	-11.9972	246.211
0	1	0	0	0	1	0	-4.02194	0	0	0	-2.95166	GO:0050954	M010001	2	0	GO Biological Processes	19	sensory perception of mechanical stimulus	19_GO:0032501 multicellular organismal process	-5.22501	7.05884	6.88595	30284	196	197	9	4.56853	1.48765	332|1277|1291|2706|6387|6591|7020|7852|54532	BIRC5|COL1A1|COL6A1|GJB2|CXCL12|SNAI2|TFAP2A|CXCR4|USP53	-3.50762	0	36	0	0	-8.53968	8.9616
0	1	1	1	0	1	0	-4.01341	-3.83659	-2.13093	0	-5.18627	GO:0002064	M011101	4	0	GO Biological Processes	19	epithelial cell development	19_GO:0032502 developmental process	-8.13791	9.36401	9.53019	30284	197	197	12	6.09137	1.70403	59|367|2194|2316|2317|5175|5914|7298|7422|7431|7852|8626	ACTA2|AR|FASN|FLNA|FLNB|PECAM1|RARA|TYMS|VEGFA|VIM|CXCR4|TP63	-5.88332	0	5	0	0	-18.3833	9.36401
0	1	1	0	0	1	0	-3.99649	-3.81976	0	0	-2.92732	GO:0060348	M011001	3	0	GO Biological Processes	19	bone development	19_GO:0032502 developmental process	-4.29228	6.17994	5.93224	30284	199	197	8	4.06091	1.4063	1277|1281|1291|2296|5788|5914|6424|7020	COL1A1|COL3A1|COL6A1|FOXC1|PTPRC|RARA|SFRP4|TFAP2A	-2.72251	0	25	0	0	-9.74314	9.22355
0	1	1	0	0	1	0	-3.98809	-3.81141	0	0	-2.9193	M5909	M011001	3	0	Hallmark Gene Sets	23	HALLMARK MYOGENESIS		-3.98809	16.3697	7.62733	30284	200	37	4	10.8108	5.10487	1277|1281|4638|6678	COL1A1|COL3A1|MYLK|SPARC	-2.62118	0	42	0	0	-8.2443	181.886
0	1	1	0	0	1	0	-3.95938	-3.74247	0	0	-11.2421	GO:0050867	M011001	3	0	GO Biological Processes	19	positive regulation of cell activation	19_GO:0032501 multicellular organismal process	-11.2421	14.3474	12.8028	30284	392	70	13	18.5714	4.64796	59|199|857|920|942|1880|2214|2316|3561|5290|5788|7070|84868	ACTA2|AIF1|CAV1|CD4|CD86|GPR183|FCGR3A|FLNA|IL2RG|PIK3CA|PTPRC|THY1|HAVCR2	-8.73309	0	11	0	0	-14.493	14.3474
0	1	0	0	0	1	0	-3.95863	0	0	0	-4.81747	GO:0044092	M010001	2	0	GO Biological Processes	19	negative regulation of molecular function	19_GO:0065007 biological regulation	-6.69099	4.36446	6.92772	30284	634	197	18	9.13706	2.05288	332|341|857|960|2316|2597|5272|5468|5728|5788|6424|6790|7070|7076|7422|7453|10221|84868	BIRC5|APOC1|CAV1|CD44|FLNA|GAPDH|SERPINB9|PPARG|PTEN|PTPRC|SFRP4|AURKA|THY1|TIMP1|VEGFA|WARS1|TRIB1|HAVCR2	-4.70389	0	28	0	0	-9.44961	10.9804
0	1	1	0	0	1	0	-3.94676	-6.48148	0	0	-5.08752	hsa05415	M011001	3	0	KEGG Pathway	24	Diabetic cardiomyopathy		-6.48148	21.6186	10.9064	30284	205	41	6	14.6341	5.51993	1277|1278|1281|2597|4313|5728	COL1A1|COL1A2|COL3A1|GAPDH|MMP2|PTEN	-4.67141	0	14	0	0	-11.9972	246.211
0	1	0	1	0	1	0	-3.92852	0	-2.90532	0	-6.46516	GO:0032970	M010101	3	0	GO Biological Processes	19	regulation of actin filament-based process	19_GO:0050789 regulation of biological process	-8.05127	6.17994	8.41734	30284	398	197	16	8.12183	1.94626	59|857|1265|1613|1824|1832|2017|2316|3728|4070|5290|6385|6387|6422|6840|9839	ACTA2|CAV1|CNN2|DAPK3|DSC2|DSP|CTTN|FLNA|JUP|TACSTD2|PIK3CA|SDC4|CXCL12|SFRP1|SVIL|ZEB2	-5.81277	0	48	1	1	-8.05127	6.17994
0	1	0	0	0	1	0	-3.90649	0	0	0	-2.84142	GO:0043270	M010001	2	0	GO Biological Processes	19	positive regulation of monoatomic ion transport	19_GO:0051179 localization	-3.90649	15.5902	7.42053	30284	210	37	4	10.8108	5.10487	2316|4638|6387|7070	FLNA|MYLK|CXCL12|THY1	-2.5519	0	123	0	0	-4.17248	38.1731
0	1	0	0	0	1	0	-3.90319	0	0	0	-3.46578	GO:0010959	M010001	2	0	GO Biological Processes	19	regulation of metal ion transport	19_GO:0051179 localization	-3.90319	10.1549	6.47096	30284	403	37	5	13.5135	5.62027	920|2316|4638|6387|7070	CD4|FLNA|MYLK|CXCL12|THY1	-2.54913	0	123	0	0	-4.17248	38.1731
0	1	0	0	0	1	0	-3.89593	0	0	0	-7.52235	R-HSA-1280215	M010001	2	0	Reactome Gene Sets	6	Cytokine Signaling in Immune system		-7.52235	7.97472	8.65912	30284	651	70	12	17.1429	4.50461	595|920|942|960|1265|1278|3687|4313|5290|7431|84868|92610	CCND1|CD4|CD86|CD44|CNN2|COL1A2|ITGAX|MMP2|PIK3CA|VIM|HAVCR2|TIFA	-5.54781	0	32	0	0	-8.9187	35.078
0	1	1	0	0	1	0	-3.88868	-2.74211	0	0	-12.9809	GO:0050865	M011001	3	0	GO Biological Processes	19	regulation of cell activation	19_GO:0032501 multicellular organismal process	-12.9809	11.2629	12.7614	30284	653	70	17	24.2857	5.12525	59|199|857|920|942|1880|2207|2214|2316|3561|4332|5290|5788|6422|7070|10875|84868	ACTA2|AIF1|CAV1|CD4|CD86|GPR183|FCER1G|FCGR3A|FLNA|IL2RG|MNDA|PIK3CA|PTPRC|SFRP1|THY1|FGL2|HAVCR2	-10.1924	0	11	0	0	-14.493	14.3474
0	1	1	0	0	1	0	-3.84103	-3.70713	0	0	-4.37775	GO:0014823	M011001	3	0	GO Biological Processes	19	response to activity	19_GO:0050896 response to stimulus	-4.37775	20.8496	8.71613	30284	83	70	4	5.71429	2.77431	1291|4313|5290|7852	COL6A1|MMP2|PIK3CA|CXCR4	-2.931	0	52	0	0	-7.88213	41.8673
0	1	1	0	0	1	0	-3.77203	-4.63143	0	0	-4.21117	GO:0007169	M011001	3	0	GO Biological Processes	19	cell surface receptor protein tyrosine kinase signaling pathway	19_GO:0050896 response to stimulus	-5.26575	4.64753	6.16417	30284	430	197	13	6.59898	1.76881	367|920|1277|1282|1291|1956|2064|2264|2296|2886|4313|5290|7422	AR|CD4|COL1A1|COL4A1|COL6A1|EGFR|ERBB2|FGFR4|FOXC1|GRB7|MMP2|PIK3CA|VEGFA	-3.53731	0	18	0	0	-10.308	34.7593
0	1	1	0	0	1	0	-3.74771	-4.82936	0	0	-2.69046	GO:0048705	M011001	3	0	GO Biological Processes	19	skeletal system morphogenesis	19_GO:0032502 developmental process	-5.51637	6.6548	6.98108	30284	231	197	10	5.07614	1.56394	1277|1281|2296|4313|5914|6422|6424|7020|7422|9968	COL1A1|COL3A1|FOXC1|MMP2|RARA|SFRP1|SFRP4|TFAP2A|VEGFA|MED12	-3.73479	0	25	0	0	-9.74314	9.22355
0	1	0	0	0	1	0	-3.73685	0	0	0	-5.66693	WP2328	M010001	2	0	WikiPathways	27	Allograft rejection		-5.67832	11.9565	8.42314	30284	90	197	7	3.5533	1.31894	712|714|942|1289|6387|7422|7431	C1QA|C1QC|CD86|COL5A1|CXCL12|VEGFA|VIM	-3.86529	0	55	0	0	-7.58938	129.789
0	1	0	0	0	1	0	-3.71216	0	0	0	-3.65611	GO:0002685	M010001	2	0	GO Biological Processes	19	regulation of leukocyte migration	19_GO:0040011 locomotion	-4.58191	5.86243	6.06799	30284	236	197	9	4.56853	1.48765	199|928|1265|1524|5764|6387|7070|7422|57402	AIF1|CD9|CNN2|CX3CR1|PTN|CXCL12|THY1|VEGFA|S100A14	-2.95427	0	8	0	0	-15.4254	9.60787
0	1	1	0	0	1	0	-3.69846	-2.51491	0	0	-4.11199	R-HSA-422475	M011001	3	0	Reactome Gene Sets	6	Axon guidance		-4.11199	6.79013	5.92947	30284	446	70	7	10	3.58569	1282|1289|1291|4313|5290|5788|7852	COL4A1|COL5A1|COL6A1|MMP2|PIK3CA|PTPRC|CXCR4	-2.72027	0	52	0	0	-7.88213	41.8673
0	1	0	0	0	1	0	-3.68947	0	0	0	-3.22356	GO:0010975	M010001	2	0	GO Biological Processes	19	regulation of neuron projection development	19_GO:0032502 developmental process	-5.07518	4.4608	5.97156	30284	448	197	13	6.59898	1.76881	999|2316|2625|3655|4193|5728|5764|6387|6422|7070|7422|7431|81618	CDH1|FLNA|GATA3|ITGA6|MDM2|PTEN|PTN|CXCL12|SFRP1|THY1|VEGFA|VIM|ITM2C	-3.38523	0	35	0	0	-8.54798	24.992
0	1	0	0	0	0	0	-3.68103	0	0	0	0	GO:0014910	M010000	1	0	GO Biological Processes	19	regulation of smooth muscle cell migration	19_GO:0040011 locomotion	-3.68103	26.1219	8.53187	30284	94	37	3	8.10811	4.48743	199|10221|10631	AIF1|TRIB1|POSTN	-2.37008	0	132	1	1	-3.68103	26.1219
0	1	1	0	0	1	0	-3.63	-2.33748	0	0	-6.95828	GO:0060485	M011001	3	0	GO Biological Processes	19	mesenchyme development	19_GO:0032502 developmental process	-6.95828	13.9558	9.8608	30284	248	70	8	11.4286	3.80272	59|72|2296|2316|6275|6422|6591|10409	ACTA2|ACTG2|FOXC1|FLNA|S100A4|SFRP1|SNAI2|BASP1	-5.07459	0	68	1	1	-6.95828	68.3098
0	1	0	0	1	1	0	-3.6267	0	0	-4.85327	-3.5567	GO:0051129	M010011	3	0	GO Biological Processes	19	negative regulation of cellular component organization	19_GO:0048519 negative regulation of biological process	-8.54798	4.63283	8.03974	30284	730	197	22	11.1675	2.24404	332|341|367|857|991|999|1063|1265|2316|4070|4193|5290|5468|5728|6840|7037|7070|7153|7422|7431|10403|81618	BIRC5|APOC1|AR|CAV1|CDC20|CDH1|CENPF|CNN2|FLNA|TACSTD2|MDM2|PIK3CA|PPARG|PTEN|SVIL|TFRC|THY1|TOP2A|VEGFA|VIM|NDC80|ITM2C	-6.1819	0	35	1	1	-8.54798	24.992
0	1	1	0	0	1	0	-3.60615	-2.44358	0	0	-3.98779	R-HSA-9675108	M011001	3	0	Reactome Gene Sets	6	Nervous system development		-3.98779	6.4848	5.74952	30284	467	70	7	10	3.58569	1282|1289|1291|4313|5290|5788|7852	COL4A1|COL5A1|COL6A1|MMP2|PIK3CA|PTPRC|CXCR4	-2.62118	0	52	0	0	-7.88213	41.8673
0	1	1	0	0	0	0	-3.60175	-3.46858	0	0	0	GO:0060349	M011000	2	0	GO Biological Processes	19	bone morphogenesis	19_GO:0032502 developmental process	-4.29777	9.22355	6.66522	30284	100	197	6	3.04569	1.22431	1277|1281|2296|5914|6424|7020	COL1A1|COL3A1|FOXC1|RARA|SFRP4|TFAP2A	-2.7263	0	25	0	0	-9.74314	9.22355
0	1	0	0	0	1	0	-3.597	0	0	0	-3.51695	GO:0051924	M010001	2	0	GO Biological Processes	19	regulation of calcium ion transport	19_GO:0051179 localization	-3.597	12.9405	6.67048	30284	253	37	4	10.8108	5.10487	920|4638|6387|7070	CD4|MYLK|CXCL12|THY1	-2.30457	0	123	0	0	-4.17248	38.1731
0	1	0	0	0	1	0	-3.58484	0	0	0	-3.10562	GO:0043269	M010001	2	0	GO Biological Processes	19	regulation of monoatomic ion transport	19_GO:0051179 localization	-3.58484	8.67041	5.87426	30284	472	37	5	13.5135	5.62027	920|2316|4638|6387|7070	CD4|FLNA|MYLK|CXCL12|THY1	-2.29351	0	123	0	0	-4.17248	38.1731
0	1	1	0	0	1	0	-3.56061	-3.31061	0	0	-2.76036	M5885	M011001	3	0	Canonical Pathways	11	NABA MATRISOME ASSOCIATED		-5.63828	3.68451	6.02801	30284	751	197	18	9.13706	2.05288	712|714|4313|4320|4582|5272|5764|6275|6279|6385|6387|6422|6424|7076|7422|8754|57402|57758	C1QA|C1QC|MMP2|MMP11|MUC1|SERPINB9|PTN|S100A4|S100A8|SDC4|CXCL12|SFRP1|SFRP4|TIMP1|VEGFA|ADAM9|S100A14|SCUBE2	-3.83551	0	97	1	1	-5.63828	4.03362
0	1	0	0	0	0	0	-3.53938	0	0	0	0	R-HSA-114608	M010000	1	0	Reactome Gene Sets	6	Platelet degranulation		-3.53938	23.3853	8.03646	30284	105	37	3	8.10811	4.48743	5175|6678|7076	PECAM1|SPARC|TIMP1	-2.25424	0	20	0	0	-10.208	81.8486
0	1	1	0	0	0	0	-3.52727	-4.88621	0	0	0	GO:0032526	M011000	2	0	GO Biological Processes	19	response to retinoic acid	19_GO:0050896 response to stimulus	-4.88621	27.873	10.2048	30284	106	41	4	9.7561	4.63399	360|1277|4313|5914	AQP3|COL1A1|MMP2|RARA	-3.35837	0	14	0	0	-11.9972	246.211
0	1	1	0	0	1	0	-3.51529	-3.38241	0	0	-3.94742	GO:0031214	M011001	3	0	GO Biological Processes	19	biomineral tissue development	19_GO:0032502 developmental process	-3.94742	16.173	7.56782	30284	107	70	4	5.71429	2.77431	1277|1278|1291|5764	COL1A1|COL1A2|COL6A1|PTN	-2.58765	0	4	0	0	-18.8935	204.622
0	1	0	0	0	0	0	-3.49166	0	0	0	0	R-HSA-381426	M010000	1	0	Reactome Gene Sets	6	Regulation of Insulin-like Growth Factor (IGF) transport and uptake by Insulin-like Growth Factor Binding Proteins (IGFBPs)		-3.49166	22.5272	7.87472	30284	109	37	3	8.10811	4.48743	4313|7076|8404	MMP2|TIMP1|SPARCL1	-2.2135	0	20	0	0	-10.208	81.8486
0	1	0	0	0	0	0	-3.48002	0	0	0	0	R-HSA-76005	M010000	1	0	Reactome Gene Sets	6	Response to elevated platelet cytosolic Ca2+		-3.48002	22.3224	7.83564	30284	110	37	3	8.10811	4.48743	5175|6678|7076	PECAM1|SPARC|TIMP1	-2.20487	0	20	0	0	-10.208	81.8486
0	1	1	0	0	1	0	-3.45963	-5.73798	0	0	-3.35149	GO:0042063	M011001	3	0	GO Biological Processes	19	gliogenesis	19_GO:0032502 developmental process	-6.54817	6.70804	7.69433	30284	275	197	12	6.09137	1.70403	712|928|1281|1291|1956|2064|5728|6279|6659|7431|9839|9968	C1QA|CD9|COL3A1|COL6A1|EGFR|ERBB2|PTEN|S100A8|SOX4|VIM|ZEB2|MED12	-4.58424	0	51	0	0	-7.9002	20.7738
0	1	0	0	0	1	0	-3.44182	0	0	0	-3.33007	GO:0007015	M010001	2	0	GO Biological Processes	19	actin filament organization	19_GO:0009987 cellular process	-3.44182	11.7768	6.31345	30284	278	37	4	10.8108	5.10487	199|1265|2316|9839	AIF1|CNN2|FLNA|ZEB2	-2.17434	0	122	0	0	-4.18484	11.7768
0	1	1	0	0	1	0	-3.43056	-6.44472	0	0	-2.93255	GO:0031667	M011001	3	0	GO Biological Processes	19	response to nutrient levels	19_GO:0050896 response to stimulus	-7.33025	5.1242	7.60062	30284	510	197	17	8.62944	2.00061	360|857|968|1277|1291|1824|1956|4193|5468|5914|6422|7037|7298|8644|9839|10631|51520	AQP3|CAV1|CD68|COL1A1|COL6A1|DSC2|EGFR|MDM2|PPARG|RARA|SFRP1|TFRC|TYMS|AKR1C3|ZEB2|POSTN|LARS1	-5.21768	0	49	0	0	-8.02229	14.3001
0	1	1	0	0	1	0	-3.42865	-5.01501	0	0	-4.05567	GO:0060322	M011001	3	0	GO Biological Processes	19	head development	19_GO:0032502 developmental process	-5.29652	3.48059	5.73523	30284	795	197	18	9.13706	2.05288	220|999|1063|1277|1281|1282|1524|1956|2296|2316|4313|4677|5728|5914|6387|6659|7852|10409	ALDH1A3|CDH1|CENPF|COL1A1|COL3A1|COL4A1|CX3CR1|EGFR|FOXC1|FLNA|MMP2|NARS1|PTEN|RARA|CXCL12|SOX4|CXCR4|BASP1	-3.56193	0	105	1	1	-5.29652	3.48059
0	1	1	0	0	1	0	-3.41506	-2.29628	0	0	-5.54831	GO:0001819	M011001	3	0	GO Biological Processes	19	positive regulation of cytokine production	19_GO:0032501 multicellular organismal process	-5.54831	7.57521	7.23679	30284	514	70	9	12.8571	4.00073	199|920|929|942|2207|2214|2597|5788|84868	AIF1|CD4|CD14|CD86|FCER1G|FCGR3A|GAPDH|PTPRC|HAVCR2	-3.90691	0	85	0	0	-6.00722	18.9749
0	1	1	0	0	1	0	-3.41239	-3.27989	0	0	-3.81198	GO:0090263	M011001	3	0	GO Biological Processes	19	positive regulation of canonical Wnt signaling pathway	19_GO:0048518 positive regulation of biological process	-7.13861	11.927	9.54114	30284	116	197	9	4.56853	1.48765	1001|1277|1613|1956|3728|6422|6424|6659|9839	CDH3|COL1A1|DAPK3|EGFR|JUP|SFRP1|SFRP4|SOX4|ZEB2	-5.06284	0	62	1	1	-7.13861	11.927
0	1	0	0	0	1	0	-3.40147	0	0	0	-2.59378	GO:0051928	M010001	2	0	GO Biological Processes	19	positive regulation of calcium ion transport	19_GO:0051179 localization	-3.40147	20.9868	7.57583	30284	117	37	3	8.10811	4.48743	4638|6387|7070	MYLK|CXCL12|THY1	-2.14235	0	123	0	0	-4.17248	38.1731
0	1	0	0	0	1	0	-3.38957	0	0	0	-3.26734	GO:0062197	M010001	2	0	GO Biological Processes	19	cellular response to chemical stress	19_GO:0050896 response to stimulus	-3.38957	11.4075	6.19593	30284	287	37	4	10.8108	5.10487	199|2706|4313|4638	AIF1|GJB2|MMP2|MYLK	-2.13293	0	139	1	1	-3.38957	11.4075
0	1	0	0	0	1	0	-3.3693	0	0	0	-3.75534	WP2431	M010001	2	0	WikiPathways	27	Spinal cord injury		-3.75534	14.421	7.09045	30284	120	70	4	5.71429	2.77431	199|595|1282|7431	AIF1|CCND1|COL4A1|VIM	-2.43001	0	60	0	0	-7.23632	14.421
0	1	1	0	0	1	0	-3.35437	-6.31866	0	0	-7.44052	GO:0071363	M011001	3	0	GO Biological Processes	19	cellular response to growth factor stimulus	19_GO:0050896 response to stimulus	-10.308	6.09103	9.56783	30284	530	197	21	10.6599	2.1987	59|857|960|1277|1278|1281|1524|1956|2064|2264|2296|2625|4193|5290|5468|6422|6591|7422|8754|9404|10631	ACTA2|CAV1|CD44|COL1A1|COL1A2|COL3A1|CX3CR1|EGFR|ERBB2|FGFR4|FOXC1|GATA3|MDM2|PIK3CA|PPARG|SFRP1|SNAI2|VEGFA|ADAM9|LPXN|POSTN	-7.59632	0	18	1	1	-10.308	34.7593
0	1	1	0	0	1	0	-3.35013	-4.32872	0	0	-6.39575	GO:0001503	M011001	3	0	GO Biological Processes	19	ossification	19_GO:0032501 multicellular organismal process	-6.39575	11.7722	8.93376	30284	294	70	8	11.4286	3.80272	1277|1278|1291|2296|4313|5764|6422|6591	COL1A1|COL1A2|COL6A1|FOXC1|MMP2|PTN|SFRP1|SNAI2	-4.60752	0	71	0	0	-6.63981	23.3853
0	1	0	0	0	1	0	-3.30739	0	0	0	-2.50284	GO:0010811	M010001	2	0	GO Biological Processes	19	positive regulation of cell-substrate adhesion	19_GO:0048518 positive regulation of biological process	-5.74158	9.76037	7.97351	30284	126	197	8	4.06091	1.4063	2316|3655|3728|6385|6422|7070|7422|151887	FLNA|ITGA6|JUP|SDC4|SFRP1|THY1|VEGFA|CCDC80	-3.91795	0	37	0	0	-8.51617	22.3773
0	1	0	0	0	1	0	-3.29207	0	0	0	-3.56744	GO:0060627	M010001	2	0	GO Biological Processes	19	regulation of vesicle-mediated transport	19_GO:0051179 localization	-3.57704	3.37241	4.53084	30284	547	197	12	6.09137	1.70403	341|857|929|1265|2207|3561|4193|4638|5788|6385|6424|7422	APOC1|CAV1|CD14|CNN2|FCER1G|IL2RG|MDM2|MYLK|PTPRC|SDC4|SFRP4|VEGFA	-2.11006	0	109	0	0	-5.19627	5.47244
0	1	1	0	0	1	0	-3.28744	-6.08245	0	0	-4.91682	GO:0021782	M011001	3	0	GO Biological Processes	19	glial cell development	19_GO:0032502 developmental process	-7.9002	12.0098	10.1005	30284	128	197	10	5.07614	1.56394	712|1291|1956|2064|5728|6279|6659|7431|9839|9968	C1QA|COL6A1|EGFR|ERBB2|PTEN|S100A8|SOX4|VIM|ZEB2|MED12	-5.69998	0	51	1	1	-7.9002	20.7738
0	1	1	0	0	1	0	-3.23885	-6.12726	0	0	-7.18293	GO:0070848	M011001	3	0	GO Biological Processes	19	response to growth factor	19_GO:0050896 response to stimulus	-9.84141	5.74421	9.1862	30284	562	197	21	10.6599	2.1987	59|857|960|1277|1278|1281|1524|1956|2064|2264|2296|2625|4193|5290|5468|6422|6591|7422|8754|9404|10631	ACTA2|CAV1|CD44|COL1A1|COL1A2|COL3A1|CX3CR1|EGFR|ERBB2|FGFR4|FOXC1|GATA3|MDM2|PIK3CA|PPARG|SFRP1|SNAI2|VEGFA|ADAM9|LPXN|POSTN	-7.25171	0	18	0	0	-10.308	34.7593
0	1	0	0	0	1	0	-3.22948	0	0	0	-2.42772	hsa04270	M010001	2	0	KEGG Pathway	24	Vascular smooth muscle contraction		-3.22948	18.3243	7.0295	30284	134	37	3	8.10811	4.48743	59|72|4638	ACTA2|ACTG2|MYLK	-2.00839	0	113	0	0	-4.97082	70.156
0	1	0	0	0	1	0	-3.1872	0	0	0	-10.2874	GO:0006954	M010001	2	0	GO Biological Processes	19	inflammatory response	19_GO:0050896 response to stimulus	-10.2874	10.4971	11.0864	30284	577	70	14	20	4.78091	199|712|929|960|968|1291|1524|2205|2214|4069|5764|7852|9839|84868	AIF1|C1QA|CD14|CD44|CD68|COL6A1|CX3CR1|FCER1A|FCGR3A|LYZ|PTN|CXCR4|ZEB2|HAVCR2	-7.94947	0	19	1	1	-10.2874	43.2629
0	1	1	1	0	1	0	-3.18381	-7.19228	-2.21104	0	-4.25171	GO:0007507	M011101	4	0	GO Biological Processes	19	heart development	19_GO:0032502 developmental process	-7.19228	11.5012	9.38557	30284	578	41	9	21.9512	6.46428	1281|1289|1291|2316|4313|5728|5914|6659|7422	COL3A1|COL5A1|COL6A1|FLNA|MMP2|PTEN|RARA|SOX4|VEGFA	-5.27411	0	61	1	1	-7.19228	65.1736
0	1	1	0	0	1	0	-3.15629	-3.0249	0	0	-7.39551	GO:0030595	M011001	3	0	GO Biological Processes	19	leukocyte chemotaxis	19_GO:0040011 locomotion	-7.46777	10.8258	9.49659	30284	142	197	10	5.07614	1.56394	1524|1880|2207|4313|5764|6279|6387|7422|7852|58191	CX3CR1|GPR183|FCER1G|MMP2|PTN|S100A8|CXCL12|VEGFA|CXCR4|CXCL16	-5.32775	0	29	0	0	-9.13593	22.3773
0	1	1	0	0	1	0	-3.14743	-5.26016	0	0	-4.91788	hsa05165	M011001	3	0	KEGG Pathway	24	Human papillomavirus infection		-5.67438	5.53967	6.74037	30284	333	197	12	6.09137	1.70403	595|1277|1278|1282|1291|1956|1978|3655|4193|5290|5728|7422	CCND1|COL1A1|COL1A2|COL4A1|COL6A1|EGFR|EIF4EBP1|ITGA6|MDM2|PIK3CA|PTEN|VEGFA	-3.86284	0	13	0	0	-12.4213	30.7452
0	1	1	0	0	1	0	-3.13867	-4.36349	0	0	-4.6696	M5942	M011001	3	0	Hallmark Gene Sets	23	HALLMARK UV RESPONSE DN		-5.30836	8.54033	7.3391	30284	144	197	8	4.06091	1.4063	857|1277|1278|1281|2064|5468|5728|6591	CAV1|COL1A1|COL1A2|COL3A1|ERBB2|PPARG|PTEN|SNAI2	-3.57254	0	104	1	1	-5.30836	8.54033
0	1	1	0	0	1	0	-3.11853	-6.4741	0	0	-5.93102	WP4172	M011001	3	0	WikiPathways	27	PI3K Akt signaling		-7.25342	6.34856	8.01342	30284	339	197	14	7.1066	1.83059	595|1277|1278|1282|1291|1956|1978|2264|3561|3655|4193|5290|5728|7422	CCND1|COL1A1|COL1A2|COL4A1|COL6A1|EGFR|EIF4EBP1|FGFR4|IL2RG|ITGA6|MDM2|PIK3CA|PTEN|VEGFA	-5.16385	0	13	0	0	-12.4213	30.7452
0	1	0	0	0	0	0	-3.11271	0	0	0	0	GO:0043433	M010000	1	0	GO Biological Processes	19	negative regulation of DNA-binding transcription factor activity	19_GO:0050789 regulation of biological process	-3.11271	16.7038	6.67533	30284	147	37	3	8.10811	4.48743	2316|6424|10221	FLNA|SFRP4|TRIB1	-1.91452	0	138	0	0	-3.40329	16.7038
0	1	0	0	0	1	0	-3.10902	0	0	0	-5.91196	GO:0006935	M010001	2	0	GO Biological Processes	19	chemotaxis	19_GO:0040011 locomotion	-5.91196	10.1496	8.17858	30284	341	70	8	11.4286	3.80272	1524|1880|2207|4313|5764|6275|7852|58191	CX3CR1|GPR183|FCER1G|MMP2|PTN|S100A4|CXCR4|CXCL16	-4.20026	0	29	0	0	-9.13593	22.3773
0	1	0	0	0	1	0	-3.10418	0	0	0	-2.30729	GO:0071675	M010001	2	0	GO Biological Processes	19	regulation of mononuclear cell migration	19_GO:0040011 locomotion	-3.36619	6.23213	5.16309	30284	148	197	6	3.04569	1.22431	199|928|1265|1524|6387|57402	AIF1|CD9|CNN2|CX3CR1|CXCL12|S100A14	-1.92578	0	8	0	0	-15.4254	9.60787
0	1	0	0	0	1	0	-3.09957	0	0	0	-5.89301	GO:0042330	M010001	2	0	GO Biological Processes	19	taxis	19_GO:0040011 locomotion	-5.89301	10.0905	8.14975	30284	343	70	8	11.4286	3.80272	1524|1880|2207|4313|5764|6275|7852|58191	CX3CR1|GPR183|FCER1G|MMP2|PTN|S100A4|CXCR4|CXCL16	-4.18249	0	29	0	0	-9.13593	22.3773
0	1	0	0	0	1	0	-3.08551	0	0	0	-3.82116	GO:0043086	M010001	2	0	GO Biological Processes	19	negative regulation of catalytic activity	19_GO:0065007 biological regulation	-5.50335	5.33153	6.55709	30284	346	197	12	6.09137	1.70403	332|341|960|2597|5272|5728|5788|7070|7076|7422|7453|10221	BIRC5|APOC1|CD44|GAPDH|SERPINB9|PTEN|PTPRC|THY1|TIMP1|VEGFA|WARS1|TRIB1	-3.72724	0	28	0	0	-9.44961	10.9804
0	1	0	0	0	1	0	-3.08085	0	0	0	-5.85549	GO:0001525	M010001	2	0	GO Biological Processes	19	angiogenesis	19_GO:0032502 developmental process	-5.85549	9.97415	8.09279	30284	347	70	8	11.4286	3.80272	857|1282|2296|2316|4313|5290|7070|22918	CAV1|COL4A1|FOXC1|FLNA|MMP2|PIK3CA|THY1|CD93	-4.15308	0	1	0	0	-27.2132	69.5714
0	1	0	0	0	1	0	-3.07066	0	0	0	-3.36414	GO:0002687	M010001	2	0	GO Biological Processes	19	positive regulation of leukocyte migration	19_GO:0040011 locomotion	-4.1893	7.07948	6.08019	30284	152	197	7	3.5533	1.31894	199|1524|5764|6387|7070|7422|57402	AIF1|CX3CR1|PTN|CXCL12|THY1|VEGFA|S100A14	-2.63776	0	8	0	0	-15.4254	9.60787
0	1	1	0	0	1	0	-3.07066	-2.93969	0	0	-3.36414	GO:0030177	M011001	3	0	GO Biological Processes	19	positive regulation of Wnt signaling pathway	19_GO:0048518 positive regulation of biological process	-6.13607	9.10219	8.10314	30284	152	197	9	4.56853	1.48765	1001|1277|1613|1956|3728|6422|6424|6659|9839	CDH3|COL1A1|DAPK3|EGFR|JUP|SFRP1|SFRP4|SOX4|ZEB2	-4.22539	0	62	0	0	-7.13861	11.927
0	1	1	0	0	1	0	-3.03003	-2.89928	0	0	-2.23627	GO:0009411	M011001	3	0	GO Biological Processes	19	response to UV	19_GO:0050896 response to stimulus	-5.03205	7.83317	6.94604	30284	157	197	8	4.06091	1.4063	595|1291|1956|4193|4311|4313|7076|9768	CCND1|COL6A1|EGFR|MDM2|MME|MMP2|TIMP1|PCLAF	-3.34765	0	87	0	0	-5.93536	7.83317
0	1	0	0	0	1	0	-3.01416	0	0	0	-5.72288	GO:0006909	M010001	2	0	GO Biological Processes	19	phagocytosis	19_GO:0051179 localization	-5.72288	16.3256	9.32604	30284	159	70	6	8.57143	3.34594	199|929|1265|5175|5290|22918	AIF1|CD14|CNN2|PECAM1|PIK3CA|CD93	-4.04287	0	15	0	0	-11.92	16.3256
0	1	1	1	0	1	0	-3.01268	-6.28267	-2.2123	0	-5.71887	hsa04151	M011101	4	0	KEGG Pathway	24	PI3K-Akt signaling pathway		-7.75355	6.36986	8.31696	30284	362	197	15	7.61421	1.88965	595|1277|1278|1282|1291|1956|1978|2064|2264|3561|3655|4193|5290|5728|7422	CCND1|COL1A1|COL1A2|COL4A1|COL6A1|EGFR|EIF4EBP1|ERBB2|FGFR4|IL2RG|ITGA6|MDM2|PIK3CA|PTEN|VEGFA	-5.58087	0	13	0	0	-12.4213	30.7452
0	1	1	1	0	1	0	-2.9985	-2.86792	-2.37316	0	-4.43721	M5902	M011101	4	0	Hallmark Gene Sets	23	HALLMARK APOPTOSIS		-9.13524	11.4578	10.7659	30284	161	197	12	6.09137	1.70403	595|857|929|960|1491|2064|3875|4060|4313|5914|7076|7153	CCND1|CAV1|CD14|CD44|CTH|ERBB2|KRT18|LUM|MMP2|RARA|TIMP1|TOP2A	-6.6942	0	30	1	1	-9.13524	11.4578
0	1	0	0	0	1	0	-2.98192	0	0	0	-2.78143	GO:0045859	M010001	2	0	GO Biological Processes	19	regulation of protein kinase activity	19_GO:0050789 regulation of biological process	-6.80189	5.83242	7.55747	30284	369	197	14	7.1066	1.83059	595|920|990|1956|2064|5728|5788|7070|7453|8754|9618|10221|56892|100133941	CCND1|CD4|CDC6|EGFR|ERBB2|PTEN|PTPRC|THY1|WARS1|ADAM9|TRAF4|TRIB1|TCIM|CD24	-4.78445	0	43	0	0	-8.2084	7.08414
0	1	0	0	0	1	0	-2.97351	0	0	0	-3.92622	GO:0001932	M010001	2	0	GO Biological Processes	19	regulation of protein phosphorylation	19_GO:0050789 regulation of biological process	-7.29606	4.53539	7.33811	30284	644	197	19	9.64467	2.10323	595|857|920|990|1956|2064|5175|5728|5788|6422|7037|7070|7422|7453|8754|9618|10221|56892|100133941	CCND1|CAV1|CD4|CDC6|EGFR|ERBB2|PECAM1|PTEN|PTPRC|SFRP1|TFRC|THY1|VEGFA|WARS1|ADAM9|TRAF4|TRIB1|TCIM|CD24	-5.19226	0	43	0	0	-8.2084	7.08414
0	1	0	1	0	1	0	-2.95561	0	-2.00287	0	-5.61761	GO:0120035	M010101	3	0	GO Biological Processes	19	regulation of plasma membrane bounded cell projection organization	19_GO:0050789 regulation of biological process	-7.23319	4.49353	7.28566	30284	650	197	19	9.64467	2.10323	857|960|999|2316|2625|3655|4070|4193|5290|5728|5764|6387|6422|7070|7422|7431|26751|54443|81618	CAV1|CD44|CDH1|FLNA|GATA3|ITGA6|TACSTD2|MDM2|PIK3CA|PTEN|PTN|CXCL12|SFRP1|THY1|VEGFA|VIM|SH3YL1|ANLN|ITM2C	-5.14919	0	35	0	0	-8.54798	24.992
0	1	0	0	0	1	0	-2.90588	0	0	0	-5.51815	GO:0031344	M010001	2	0	GO Biological Processes	19	regulation of cell projection organization	19_GO:0050789 regulation of biological process	-7.05893	4.379	7.14042	30284	667	197	19	9.64467	2.10323	857|960|999|2316|2625|3655|4070|4193|5290|5728|5764|6387|6422|7070|7422|7431|26751|54443|81618	CAV1|CD44|CDH1|FLNA|GATA3|ITGA6|TACSTD2|MDM2|PIK3CA|PTEN|PTN|CXCL12|SFRP1|THY1|VEGFA|VIM|SH3YL1|ANLN|ITM2C	-4.99161	0	35	0	0	-8.54798	24.992
0	1	1	0	0	1	0	-2.90145	-2.77142	0	0	-3.14366	GO:0048660	M011001	3	0	GO Biological Processes	19	regulation of smooth muscle cell proliferation	19_GO:0050789 regulation of biological process	-4.70783	7.06786	6.49528	30284	174	197	8	4.06091	1.4063	199|1956|4193|4313|5290|5468|5728|10221	AIF1|EGFR|MDM2|MMP2|PIK3CA|PPARG|PTEN|TRIB1	-3.06742	0	80	0	0	-6.38267	16.4706
0	1	1	0	0	1	0	-2.88015	-2.75024	0	0	-2.09332	GO:0000302	M011001	3	0	GO Biological Processes	19	response to reactive oxygen species	19_GO:0050896 response to stimulus	-2.88015	13.8727	6.00731	30284	177	37	3	8.10811	4.48743	1277|1291|4313	COL1A1|COL6A1|MMP2	-1.72638	0	14	0	0	-11.9972	246.211
0	1	0	0	0	1	0	-2.87297	0	0	0	-8.75498	GO:1903037	M010001	2	0	GO Biological Processes	19	regulation of leukocyte cell-cell adhesion	19_GO:0050789 regulation of biological process	-11.745	7.78359	10.9811	30284	395	197	20	10.1523	2.1518	199|857|920|942|960|2064|2625|3561|5290|5788|5914|6385|6387|6659|7037|7070|10875|57162|84868|100133941	AIF1|CAV1|CD4|CD86|CD44|ERBB2|GATA3|IL2RG|PIK3CA|PTPRC|RARA|SDC4|CXCL12|SOX4|TFRC|THY1|FGL2|PELI1|HAVCR2|CD24	-8.8268	0	11	0	0	-14.493	14.3474
0	1	0	0	0	1	0	-2.86492	0	0	0	-2.64332	GO:0043549	M010001	2	0	GO Biological Processes	19	regulation of kinase activity	19_GO:0050789 regulation of biological process	-6.41831	5.42106	7.17503	30284	397	197	14	7.1066	1.83059	595|920|990|1956|2064|5728|5788|7070|7453|8754|9618|10221|56892|100133941	CCND1|CD4|CDC6|EGFR|ERBB2|PTEN|PTPRC|THY1|WARS1|ADAM9|TRAF4|TRIB1|TCIM|CD24	-4.47886	0	43	0	0	-8.2084	7.08414
0	1	1	0	0	1	0	-2.84103	-3.6868	0	0	-2.6152	GO:0001654	M011001	3	0	GO Biological Processes	19	eye development	19_GO:0032502 developmental process	-4.83623	4.57745	5.85021	30284	403	197	12	6.09137	1.70403	220|1282|1289|1956|2296|2625|5914|6659|7020|7070|7422|7431	ALDH1A3|COL4A1|COL5A1|EGFR|FOXC1|GATA3|RARA|SOX4|TFAP2A|THY1|VEGFA|VIM	-3.17543	0	93	0	0	-5.78668	5.55636
0	1	0	1	0	1	0	-2.83188	0	-3.27962	0	-4.16163	GO:0045216	M010101	3	0	GO Biological Processes	19	cell-cell junction organization	19_GO:0009987 cellular process	-5.44828	7.5192	7.17733	30284	184	197	9	4.56853	1.48765	928|999|1001|1832|2316|2706|3728|5175|6591	CD9|CDH1|CDH3|DSP|FLNA|GJB2|JUP|PECAM1|SNAI2	-3.69083	0	21	0	0	-10.204	10.7608
0	1	0	0	0	1	0	-2.8298	0	0	0	-3.70472	GO:0042325	M010001	2	0	GO Biological Processes	19	regulation of phosphorylation	19_GO:0050789 regulation of biological process	-8.2084	4.65165	7.8748	30284	694	197	21	10.6599	2.1987	367|595|857|920|990|1956|2064|3655|5175|5728|5788|6422|7037|7070|7422|7453|8754|9618|10221|56892|100133941	AR|CCND1|CAV1|CD4|CDC6|EGFR|ERBB2|ITGA6|PECAM1|PTEN|PTPRC|SFRP1|TFRC|THY1|VEGFA|WARS1|ADAM9|TRAF4|TRIB1|TCIM|CD24	-5.93282	0	43	1	1	-8.2084	7.08414
0	1	1	0	0	1	0	-2.82532	-3.66697	0	0	-3.44302	GO:0150063	M011001	3	0	GO Biological Processes	19	visual system development	19_GO:0032502 developmental process	-5.5242	4.91016	6.42639	30284	407	197	13	6.59898	1.76881	220|712|1282|1289|1956|2296|2625|5914|6659|7020|7070|7422|7431	ALDH1A3|C1QA|COL4A1|COL5A1|EGFR|FOXC1|GATA3|RARA|SOX4|TFAP2A|THY1|VEGFA|VIM	-3.74123	0	93	0	0	-5.78668	5.55636
0	1	1	0	0	1	0	-2.79822	-3.63277	0	0	-3.4038	GO:0048880	M011001	3	0	GO Biological Processes	19	sensory system development	19_GO:0032502 developmental process	-5.44367	4.82714	6.34454	30284	414	197	13	6.59898	1.76881	220|712|1282|1289|1956|2296|2625|5914|6659|7020|7070|7422|7431	ALDH1A3|C1QA|COL4A1|COL5A1|EGFR|FOXC1|GATA3|RARA|SOX4|TFAP2A|THY1|VEGFA|VIM	-3.68882	0	93	0	0	-5.78668	5.55636
0	1	1	0	0	0	0	-2.76619	-2.63701	0	0	0	GO:0008217	M011000	2	0	GO Biological Processes	19	regulation of blood pressure	19_GO:0032501 multicellular organismal process	-2.76619	12.657	5.69687	30284	194	37	3	8.10811	4.48743	59|1278|10631	ACTA2|COL1A2|POSTN	-1.63384	0	66	0	0	-6.98431	87.695
0	1	0	0	0	0	0	-2.75349	0	0	0	0	M3008	M010000	1	0	Canonical Pathways	11	NABA ECM GLYCOPROTEINS		-2.75349	12.5279	5.6629	30284	196	37	3	8.10811	4.48743	6678|8404|10631	SPARC|SPARCL1|POSTN	-1.62281	0	146	1	1	-2.75349	12.5279
0	1	0	0	0	1	0	-2.72849	0	0	0	-2.9193	M5921	M010001	2	0	Hallmark Gene Sets	23	HALLMARK COMPLEMENT		-4.27695	6.14904	5.91175	30284	200	197	8	4.06091	1.4063	341|712|714|2207|2625|5290|7076|8754	APOC1|C1QA|C1QC|FCER1G|GATA3|PIK3CA|TIMP1|ADAM9	-2.70912	0	55	0	0	-7.58938	129.789
0	1	0	0	0	0	0	-2.72849	0	0	0	0	M5905	M010000	1	0	Hallmark Gene Sets	23	HALLMARK ADIPOGENESIS		-2.72849	12.2773	5.59643	30284	200	37	3	8.10811	4.48743	1282|4638|8404	COL4A1|MYLK|SPARCL1	-1.60271	0	146	0	0	-2.75349	12.5279
0	1	0	0	0	1	0	-2.71988	0	0	0	-11.92	R-HSA-6798695	M010001	2	0	Reactome Gene Sets	6	Neutrophil degranulation		-11.92	13.9237	13.068	30284	435	70	14	20	4.78091	929|960|968|1265|1832|2207|3687|4069|4332|5175|5788|10875|11010|22918	CD14|CD44|CD68|CNN2|DSP|FCER1G|ITGAX|LYZ|MNDA|PECAM1|PTPRC|FGL2|GLIPR1|CD93	-9.21991	0	15	1	1	-11.92	16.3256
0	1	1	0	0	1	0	-2.71625	-2.55023	0	0	-4.1735	GO:0009314	M011001	3	0	GO Biological Processes	19	response to radiation	19_GO:0050896 response to stimulus	-5.93536	4.93615	6.69886	30284	436	197	14	7.1066	1.83059	595|1281|1291|1956|2625|3861|4193|4311|4313|5788|6422|6591|7076|9768	CCND1|COL3A1|COL6A1|EGFR|GATA3|KRT14|MDM2|MME|MMP2|PTPRC|SFRP1|SNAI2|TIMP1|PCLAF	-4.06201	0	87	1	1	-5.93536	7.83317
0	1	1	0	0	1	0	-2.65076	-2.52238	0	0	-6.19709	GO:0060326	M011001	3	0	GO Biological Processes	19	cell chemotaxis	19_GO:0040011 locomotion	-6.19709	14.2178	9.31796	30284	213	70	7	10	3.58569	1524|1880|2207|4313|5764|7852|58191	CX3CR1|GPR183|FCER1G|MMP2|PTN|CXCR4|CXCL16	-4.43963	0	29	0	0	-9.13593	22.3773
0	1	1	0	1	1	0	-2.645	-4.98955	0	-2.75167	-7.45161	GO:0043123	M011011	4	0	GO Biological Processes	19	positive regulation of canonical NF-kappaB signal transduction	19_GO:0048518 positive regulation of biological process	-7.73625	8.62014	9.05204	30284	214	197	12	6.09137	1.70403	857|920|1491|1524|2316|2597|6275|7037|7422|51523|57162|92610	CAV1|CD4|CTH|CX3CR1|FLNA|GAPDH|S100A4|TFRC|VEGFA|CXXC5|PELI1|TIFA	-5.5703	0	53	1	1	-7.73625	8.62014
0	1	1	0	0	1	0	-2.63355	-4.97002	0	0	-3.83466	GO:0010001	M011001	3	0	GO Biological Processes	19	glial cell differentiation	19_GO:0032502 developmental process	-5.77749	7.11694	7.30049	30284	216	197	10	5.07614	1.56394	712|1291|1956|2064|5728|6279|6659|7431|9839|9968	C1QA|COL6A1|EGFR|ERBB2|PTEN|S100A8|SOX4|VIM|ZEB2|MED12	-3.93693	0	51	0	0	-7.9002	20.7738
0	1	1	0	0	0	0	-2.62786	-2.49965	0	0	0	GO:0071900	M011000	2	0	GO Biological Processes	19	regulation of protein serine/threonine kinase activity	19_GO:0050789 regulation of biological process	-5.75943	7.08414	7.27826	30284	217	197	10	5.07614	1.56394	595|990|1956|2064|5728|7070|8754|10221|56892|100133941	CCND1|CDC6|EGFR|ERBB2|PTEN|THY1|ADAM9|TRIB1|TCIM|CD24	-3.9267	0	43	0	0	-8.2084	7.08414
0	1	1	1	0	1	0	-2.62509	-4.45715	-2.62251	0	-5.92748	GO:0002009	M011101	4	0	GO Biological Processes	19	morphogenesis of an epithelium	19_GO:0032502 developmental process	-9.63677	6.32206	9.32772	30284	462	197	19	9.64467	2.10323	220|367|960|1282|1289|1956|2316|2625|3872|4070|4313|5914|6385|6422|7020|7422|7852|8626|9968	ALDH1A3|AR|CD44|COL4A1|COL5A1|EGFR|FLNA|GATA3|KRT17|TACSTD2|MMP2|RARA|SDC4|SFRP1|TFAP2A|VEGFA|CXCR4|TP63|MED12	-7.1203	0	10	0	0	-14.8714	61.8041
0	1	0	0	0	1	0	-2.61832	0	0	0	-2.35456	GO:0051338	M010001	2	0	GO Biological Processes	19	regulation of transferase activity	19_GO:0065007 biological regulation	-7.12838	5.30089	7.55452	30284	464	197	16	8.12183	1.94626	595|920|990|991|1956|2064|5728|5788|7070|7453|8754|9618|10221|11065|56892|100133941	CCND1|CD4|CDC6|CDC20|EGFR|ERBB2|PTEN|PTPRC|THY1|WARS1|ADAM9|TRAF4|TRIB1|UBE2C|TCIM|CD24	-5.058	0	43	0	0	-8.2084	7.08414
0	1	1	0	1	1	0	-2.60354	-5.06701	0	-2.77086	-4.11012	GO:0051248	M011011	4	0	GO Biological Processes	19	negative regulation of protein metabolic process	19_GO:0048519 negative regulation of biological process	-9.44961	4.71793	8.52358	30284	782	197	24	12.1827	2.33039	332|857|960|1613|1956|1978|2316|2597|2886|4193|5272|5728|5788|5914|6422|6659|7070|7076|7298|7422|7453|10221|25825|81618	BIRC5|CAV1|CD44|DAPK3|EGFR|EIF4EBP1|FLNA|GAPDH|GRB7|MDM2|SERPINB9|PTEN|PTPRC|RARA|SFRP1|SOX4|THY1|TIMP1|TYMS|VEGFA|WARS1|TRIB1|BACE2|ITM2C	-6.95504	0	28	1	1	-9.44961	10.9804
0	1	1	1	0	1	0	-2.59154	-2.42712	-4.34588	0	-2.32342	GO:0071407	M011101	4	0	GO Biological Processes	19	cellular response to organic cyclic compound	19_GO:0050896 response to stimulus	-5.53444	4.55967	6.30707	30284	472	197	14	7.1066	1.83059	367|857|999|1277|1956|2316|2706|3655|3728|4193|4313|6097|6422|8644	AR|CAV1|CDH1|COL1A1|EGFR|FLNA|GJB2|ITGA6|JUP|MDM2|MMP2|RORC|SFRP1|AKR1C3	-3.75009	0	49	0	0	-8.02229	14.3001
0	1	0	0	0	0	0	-2.57253	0	0	0	0	GO:0034599	M010000	1	0	GO Biological Processes	19	cellular response to oxidative stress	19_GO:0050896 response to stimulus	-2.57253	10.817	5.19252	30284	227	37	3	8.10811	4.48743	199|2706|4313	AIF1|GJB2|MMP2	-1.47133	0	139	0	0	-3.38957	11.4075
0	1	0	0	0	1	0	-2.54584	0	0	0	-2.68365	GO:0001894	M010001	2	0	GO Biological Processes	19	tissue homeostasis	19_GO:0042592 homeostatic process	-3.0715	4.63828	4.50139	30284	232	197	7	3.5533	1.31894	1001|1281|2296|5175|7033|7422|9839	CDH3|COL3A1|FOXC1|PECAM1|TFF3|VEGFA|ZEB2	-1.67809	0	86	0	0	-5.96821	4.63828
0	1	0	0	0	1	0	-2.54584	0	0	0	-2.68365	GO:0060249	M010001	2	0	GO Biological Processes	19	anatomical structure homeostasis	19_GO:0042592 homeostatic process	-3.0715	4.63828	4.50139	30284	232	197	7	3.5533	1.31894	1001|1281|2296|5175|7033|7422|9839	CDH3|COL3A1|FOXC1|PECAM1|TFF3|VEGFA|ZEB2	-1.67809	0	86	0	0	-5.96821	4.63828
0	1	0	0	0	0	0	-2.51461	0	0	0	0	M3468	M010000	1	0	Canonical Pathways	11	NABA ECM REGULATORS		-2.51461	10.3171	5.047	30284	238	37	3	8.10811	4.48743	4313|4320|7076	MMP2|MMP11|TIMP1	-1.42588	0	20	0	0	-10.208	81.8486
0	1	1	0	0	1	0	-2.47702	-5.30795	0	0	-4.64763	GO:0090066	M011001	3	0	GO Biological Processes	19	regulation of anatomical structure size	19_GO:0065007 biological regulation	-5.30795	10.178	7.68116	30284	508	41	7	17.0732	5.87642	59|1291|1956|4313|5728|7422|51520	ACTA2|COL6A1|EGFR|MMP2|PTEN|VEGFA|LARS1	-3.70839	0	67	0	0	-6.97718	16.5058
0	1	1	0	0	1	0	-2.45949	-3.44888	0	0	-2.57277	GO:0031669	M011001	3	0	GO Biological Processes	19	cellular response to nutrient levels	19_GO:0050896 response to stimulus	-4.40018	5.55636	5.8418	30284	249	197	9	4.56853	1.48765	857|968|1277|1824|4193|6422|8644|10631|51520	CAV1|CD68|COL1A1|DSC2|MDM2|SFRP1|AKR1C3|POSTN|LARS1	-2.80423	0	49	0	0	-8.02229	14.3001
0	1	0	1	0	1	0	-2.4401	0	-6.10989	0	-3.51695	R-HSA-9006931	M010101	3	0	Reactome Gene Sets	6	Signaling by Nuclear Receptors		-7.88213	7.89896	8.91666	30284	253	197	13	6.59898	1.76881	220|341|595|857|2194|2625|4313|5290|6319|6387|7033|8644|51523	ALDH1A3|APOC1|CCND1|CAV1|FASN|GATA3|MMP2|PIK3CA|SCD|CXCL12|TFF3|AKR1C3|CXXC5	-5.69214	0	52	1	1	-7.88213	41.8673
0	1	0	0	1	0	0	-2.4353	0	0	-3.73547	0	WP5115	M010010	2	0	WikiPathways	27	Network map of SARS CoV 2 signaling		-5.15225	6.0522	6.54279	30284	254	197	10	5.07614	1.56394	332|341|891|920|929|1978|6241|6387|8754|58191	BIRC5|APOC1|CCNB1|CD4|CD14|EIF4EBP1|RRM2|CXCL12|ADAM9|CXCL16	-3.45099	0	111	1	1	-5.15225	6.0522
0	1	1	0	0	1	0	-2.40228	-2.27592	0	0	-8.02698	GO:0050870	M011001	3	0	GO Biological Processes	19	positive regulation of T cell activation	19_GO:0002376 immune system process	-8.68735	8.24583	9.51316	30284	261	197	14	7.1066	1.83059	199|857|920|942|2625|3561|5290|5788|5914|6659|7037|7070|84868|100133941	AIF1|CAV1|CD4|CD86|GATA3|IL2RG|PIK3CA|PTPRC|RARA|SOX4|TFRC|THY1|HAVCR2|CD24	-6.30508	0	11	0	0	-14.493	14.3474
0	1	0	1	0	1	0	-2.36565	0	-3.09623	0	-2.78211	GO:0030036	M010101	3	0	GO Biological Processes	19	actin cytoskeleton organization	19_GO:0009987 cellular process	-4.18484	3.66014	5.07561	30284	546	197	13	6.59898	1.76881	199|1265|2017|2316|2317|3856|3880|4604|4645|5290|6840|9839|54443	AIF1|CNN2|CTTN|FLNA|FLNB|KRT8|KRT19|MYBPC1|MYO5B|PIK3CA|SVIL|ZEB2|ANLN	-2.63411	0	122	1	1	-4.18484	11.7768
0	1	0	0	0	1	0	-2.35674	0	0	0	-3.38045	GO:0010563	M010001	2	0	GO Biological Processes	19	negative regulation of phosphorus metabolic process	19_GO:0048519 negative regulation of biological process	-3.38045	7.98208	5.55724	30284	271	70	5	7.14286	3.07818	857|5728|5788|6422|7070	CAV1|PTEN|PTPRC|SFRP1|THY1	-2.12627	0	37	0	0	-8.51617	22.3773
0	1	0	0	0	1	0	-2.35674	0	0	0	-3.38045	GO:0045936	M010001	2	0	GO Biological Processes	19	negative regulation of phosphate metabolic process	19_GO:0048519 negative regulation of biological process	-3.38045	7.98208	5.55724	30284	271	70	5	7.14286	3.07818	857|5728|5788|6422|7070	CAV1|PTEN|PTPRC|SFRP1|THY1	-2.12627	0	37	0	0	-8.51617	22.3773
0	1	1	1	0	1	0	-2.35166	-4.03425	-3.07573	0	-6.26253	GO:0098609	M011101	4	0	GO Biological Processes	19	cell-cell adhesion	19_GO:0009987 cellular process	-10.845	6.13788	9.8488	30284	551	197	22	11.1675	2.24404	960|999|1001|1524|1824|1832|1956|2316|3655|3687|3728|3875|4072|5175|5788|6279|7070|7422|8404|8754|22918|100133941	CD44|CDH1|CDH3|CX3CR1|DSC2|DSP|EGFR|FLNA|ITGA6|ITGAX|JUP|KRT18|EPCAM|PECAM1|PTPRC|S100A8|THY1|VEGFA|SPARCL1|ADAM9|CD93|CD24	-8.02755	0	16	1	1	-10.845	6.13788
0	1	1	0	0	1	0	-2.33028	-2.20458	0	0	-4.35133	GO:0060828	M011001	3	0	GO Biological Processes	19	regulation of canonical Wnt signaling pathway	19_GO:0050896 response to stimulus	-5.64951	6.10464	6.90616	30284	277	197	11	5.58376	1.63589	857|1001|1277|1613|1956|3728|6422|6424|6591|6659|9839	CAV1|CDH3|COL1A1|DAPK3|EGFR|JUP|SFRP1|SFRP4|SNAI2|SOX4|ZEB2	-3.84383	0	62	0	0	-7.13861	11.927
0	1	1	0	0	1	0	-2.32593	-4.44421	0	0	-3.33007	GO:0003018	M011001	3	0	GO Biological Processes	19	vascular process in circulatory system	19_GO:0032501 multicellular organismal process	-4.44421	13.2848	7.57644	30284	278	41	5	12.1951	5.11047	59|1956|4313|7422|8884	ACTA2|EGFR|MMP2|VEGFA|SLC5A6	-2.98452	0	14	0	0	-11.9972	246.211
0	1	1	0	0	0	0	-2.31728	-4.42939	0	0	0	GO:0021537	M011000	2	0	GO Biological Processes	19	telencephalon development	19_GO:0032502 developmental process	-4.42939	13.1899	7.54516	30284	280	41	5	12.1951	5.11047	1281|1956|2316|5728|5914	COL3A1|EGFR|FLNA|PTEN|RARA	-2.97427	0	61	0	0	-7.19228	65.1736
0	1	1	0	0	0	0	-2.30443	-3.23965	0	0	0	GO:0090596	M011000	2	0	GO Biological Processes	19	sensory organ morphogenesis	19_GO:0032502 developmental process	-3.25095	4.34561	4.57555	30284	283	197	8	4.06091	1.4063	220|1289|2625|6659|6678|7020|7070|7422	ALDH1A3|COL5A1|GATA3|SOX4|SPARC|TFAP2A|THY1|VEGFA	-1.83019	0	93	0	0	-5.78668	5.55636
0	1	1	0	0	1	0	-2.29595	-2.17059	0	0	-8.94973	GO:1903039	M011001	3	0	GO Biological Processes	19	positive regulation of leukocyte cell-cell adhesion	19_GO:0048518 positive regulation of biological process	-9.15721	8.09084	9.73217	30284	285	197	15	7.61421	1.88965	199|857|920|942|960|2625|3561|5290|5788|5914|6659|7037|7070|84868|100133941	AIF1|CAV1|CD4|CD86|CD44|GATA3|IL2RG|PIK3CA|PTPRC|RARA|SOX4|TFRC|THY1|HAVCR2|CD24	-6.69713	0	11	0	0	-14.493	14.3474
0	1	1	0	0	1	0	-2.24638	-2.12152	0	0	-3.20017	GO:0003012	M011001	3	0	GO Biological Processes	19	muscle system process	19_GO:0032501 multicellular organismal process	-3.20017	7.28331	5.23775	30284	297	70	5	7.14286	3.07818	59|1291|4638|5290|7852	ACTA2|COL6A1|MYLK|PIK3CA|CXCR4	-1.98286	0	113	0	0	-4.97082	70.156
0	1	1	0	1	1	0	-2.23433	-4.28714	0	-2.33829	-6.32948	GO:0043122	M011011	4	0	GO Biological Processes	19	regulation of canonical NF-kappaB signal transduction	19_GO:0050896 response to stimulus	-7.01398	6.66146	7.9742	30284	300	197	13	6.59898	1.76881	857|920|1491|1524|2316|2597|6275|7037|7422|9618|51523|57162|92610	CAV1|CD4|CTH|CX3CR1|FLNA|GAPDH|S100A4|TFRC|VEGFA|TRAF4|CXXC5|PELI1|TIFA	-4.96197	0	53	0	0	-7.73625	8.62014
0	1	0	1	0	1	0	-2.22241	0	-3.43775	0	-3.16108	GO:0034329	M010101	3	0	GO Biological Processes	19	cell junction assembly	19_GO:0009987 cellular process	-5.27686	5.58081	6.4846	30284	303	197	11	5.58376	1.63589	667|928|999|1001|2017|2706|3655|3728|5175|5728|7070	DST|CD9|CDH1|CDH3|CTTN|GJB2|ITGA6|JUP|PECAM1|PTEN|THY1	-3.54596	0	21	0	0	-10.204	10.7608
0	1	1	0	0	1	0	-2.21846	-4.2599	0	0	-5.17458	GO:0048608	M011001	3	0	GO Biological Processes	19	reproductive structure development	19_GO:0022414 reproductive process	-6.08657	6.06813	7.1864	30284	304	197	12	6.09137	1.70403	367|1291|2296|2316|2625|4313|5914|6422|7422|8626|8644|10409	AR|COL6A1|FOXC1|FLNA|GATA3|MMP2|RARA|SFRP1|VEGFA|TP63|AKR1C3|BASP1	-4.18367	0	10	0	0	-14.8714	61.8041
0	1	1	0	0	1	0	-2.21453	-5.47876	0	0	-2.26029	GO:0001666	M011001	3	0	GO Biological Processes	19	response to hypoxia	19_GO:0050896 response to stimulus	-6.93103	6.55225	7.88594	30284	305	197	13	6.59898	1.76881	360|857|4193|4313|5468|6387|6422|6659|7037|7422|7852|10631|100133941	AQP3|CAV1|MDM2|MMP2|PPARG|CXCL12|SFRP1|SOX4|TFRC|VEGFA|CXCR4|POSTN|CD24	-4.89665	0	33	0	0	-8.89851	7.22849
0	1	1	0	1	1	0	-2.21453	-2.09001	0	-3.4334	-4.1202	GO:0022411	M011011	4	0	GO Biological Processes	19	cellular component disassembly	19_GO:0009987 cellular process	-5.24978	5.54421	6.45421	30284	305	197	11	5.58376	1.63589	712|714|1291|1524|3159|4313|4320|6591|6790|7153|11004	C1QA|C1QC|COL6A1|CX3CR1|HMGA1|MMP2|MMP11|SNAI2|AURKA|TOP2A|KIF2C	-3.5286	0	107	1	1	-5.24978	5.54421
0	1	1	0	0	1	0	-2.20282	-4.23305	0	0	-5.13761	GO:0061458	M011001	3	0	GO Biological Processes	19	reproductive system development	19_GO:0032502 developmental process	-6.02699	5.98932	7.12153	30284	308	197	12	6.09137	1.70403	367|1291|2296|2316|2625|4313|5914|6422|7422|8626|8644|10409	AR|COL6A1|FOXC1|FLNA|GATA3|MMP2|RARA|SFRP1|VEGFA|TP63|AKR1C3|BASP1	-4.13803	0	10	0	0	-14.8714	61.8041
0	1	0	1	0	1	0	-2.18189	0	-2.8277	0	-2.5211	GO:0030029	M010101	3	0	GO Biological Processes	19	actin filament-based process	19_GO:0009987 cellular process	-3.66813	3.24422	4.55359	30284	616	197	13	6.59898	1.76881	199|1265|2017|2316|2317|3856|3880|4604|4645|5290|6840|9839|54443	AIF1|CNN2|CTTN|FLNA|FLNB|KRT8|KRT19|MYBPC1|MYO5B|PIK3CA|SVIL|ZEB2|ANLN	-2.18688	0	122	0	0	-4.18484	11.7768
0	1	1	1	0	1	0	-2.16094	-4.1611	-2.40519	0	-4.0133	GO:0072001	M011101	4	0	GO Biological Processes	19	renal system development	19_GO:0032502 developmental process	-10.3965	8.19229	10.4496	30284	319	197	17	8.62944	2.00061	59|1063|1282|2296|2625|4070|4072|4311|5175|5914|6385|6422|6659|7020|7422|10409|100133941	ACTA2|CENPF|COL4A1|FOXC1|GATA3|TACSTD2|EPCAM|MME|PECAM1|RARA|SDC4|SFRP1|SOX4|TFAP2A|VEGFA|BASP1|CD24	-7.67293	0	10	0	0	-14.8714	61.8041
0	1	1	0	0	0	0	-2.15721	-2.03332	0	0	0	GO:0009416	M011000	2	0	GO Biological Processes	19	response to light stimulus	19_GO:0050896 response to stimulus	-2.90704	3.84315	4.13731	30284	320	197	8	4.06091	1.4063	595|1291|1956|4193|4311|4313|7076|9768	CCND1|COL6A1|EGFR|MDM2|MME|MMP2|TIMP1|PCLAF	-1.53777	0	87	0	0	-5.93536	7.83317
0	1	1	0	0	1	0	-2.1461	-2.02233	0	0	-5.00352	GO:0007517	M011001	3	0	GO Biological Processes	19	muscle organ development	19_GO:0032502 developmental process	-5.00352	9.37585	7.28444	30284	323	70	7	10	3.58569	857|1291|1832|2296|4638|6840|10409	CAV1|COL6A1|DSP|FOXC1|MYLK|SVIL|BASP1	-3.45035	0	92	0	0	-5.78721	44.7547
0	1	1	1	0	1	0	-2.14088	-2.80127	-2.04937	0	-2.46314	GO:1901699	M011101	4	0	GO Biological Processes	19	cellular response to nitrogen compound	19_GO:0050896 response to stimulus	-5.35554	3.88565	5.93702	30284	633	197	16	8.12183	1.94626	857|990|999|1291|1956|2064|2264|2316|2706|3728|4193|5290|5468|6422|7431|51520	CAV1|CDC6|CDH1|COL6A1|EGFR|ERBB2|FGFR4|FLNA|GJB2|JUP|MDM2|PIK3CA|PPARG|SFRP1|VIM|LARS1	-3.6122	0	18	0	0	-10.308	34.7593
0	1	1	0	0	1	0	-2.12906	-3.68821	0	0	-3.95416	GO:0048871	M011001	3	0	GO Biological Processes	19	multicellular organismal-level homeostasis	19_GO:0042592 homeostatic process	-5.96821	4.09614	6.39575	30284	638	197	17	8.62944	2.00061	360|1001|1281|1291|1524|1880|2296|2625|4645|5175|5290|6659|7033|7037|7422|9839|132299	AQP3|CDH3|COL3A1|COL6A1|CX3CR1|GPR183|FOXC1|GATA3|MYO5B|PECAM1|PIK3CA|SOX4|TFF3|TFRC|VEGFA|ZEB2|OCIAD2	-4.08971	0	86	1	1	-5.96821	4.63828
0	1	0	0	0	1	0	-2.09572	0	0	0	-9.47892	GO:0051251	M010001	2	0	GO Biological Processes	19	positive regulation of lymphocyte activation	19_GO:0002376 immune system process	-10.0252	7.75472	10.0899	30284	337	197	17	8.62944	2.00061	199|857|920|942|1880|2214|2625|3561|5290|5788|5914|6659|7037|7070|57162|84868|100133941	AIF1|CAV1|CD4|CD86|GPR183|FCGR3A|GATA3|IL2RG|PIK3CA|PTPRC|RARA|SOX4|TFRC|THY1|PELI1|HAVCR2|CD24	-7.39853	0	11	0	0	-14.493	14.3474
0	1	0	0	0	1	0	-2.09572	0	0	0	-8.25198	GO:0022409	M010001	2	0	GO Biological Processes	19	positive regulation of cell-cell adhesion	19_GO:0048518 positive regulation of biological process	-8.25198	12.8376	10.5184	30284	337	70	10	14.2857	4.18243	199|857|920|942|960|3561|5290|5788|7070|84868	AIF1|CAV1|CD4|CD86|CD44|IL2RG|PIK3CA|PTPRC|THY1|HAVCR2	-6.16242	0	11	0	0	-14.493	14.3474
0	1	0	0	0	0	0	-2.09221	0	0	0	0	GO:0051090	M010000	1	0	GO Biological Processes	19	regulation of DNA-binding transcription factor activity	19_GO:0050789 regulation of biological process	-3.40329	4.09329	4.62757	30284	338	197	9	4.56853	1.48765	367|2316|3728|5728|6279|6424|7037|10221|84868	AR|FLNA|JUP|PTEN|S100A8|SFRP4|TFRC|TRIB1|HAVCR2	-1.95526	0	138	1	1	-3.40329	16.7038
0	1	1	0	0	0	0	-2.07483	-2.92936	0	0	0	M5883	M011000	2	0	Canonical Pathways	11	NABA SECRETED FACTORS		-3.35723	4.03362	4.57213	30284	343	197	9	4.56853	1.48765	5764|6275|6279|6387|6422|6424|7422|57402|57758	PTN|S100A4|S100A8|CXCL12|SFRP1|SFRP4|VEGFA|S100A14|SCUBE2	-1.91914	0	97	0	0	-5.63828	4.03362
0	1	0	0	0	1	0	-2.05097	0	0	0	-3.79412	GO:0030111	M010001	2	0	GO Biological Processes	19	regulation of Wnt signaling pathway	19_GO:0050896 response to stimulus	-4.69189	4.83139	5.83379	30284	350	197	11	5.58376	1.63589	857|1001|1277|1613|1956|3728|6422|6424|6591|6659|9839	CAV1|CDH3|COL1A1|DAPK3|EGFR|JUP|SFRP1|SFRP4|SNAI2|SOX4|ZEB2	-3.05644	0	62	0	0	-7.13861	11.927
0	1	1	0	0	1	0	-2.03424	-2.87444	0	0	-2.03263	GO:0043010	M011001	3	0	GO Biological Processes	19	camera-type eye development	19_GO:0032502 developmental process	-4.63535	4.76334	5.77144	30284	355	197	11	5.58376	1.63589	220|1282|1956|2296|2625|5914|6659|7020|7070|7422|7431	ALDH1A3|COL4A1|EGFR|FOXC1|GATA3|RARA|SOX4|TFAP2A|THY1|VEGFA|VIM	-3.00381	0	93	0	0	-5.78668	5.55636
0	1	1	0	0	1	0	-2.03093	-3.93729	0	0	-3.75422	GO:0060537	M011001	3	0	GO Biological Processes	19	muscle tissue development	19_GO:0032502 developmental process	-3.93729	10.3741	6.55079	30284	356	41	5	12.1951	5.11047	1281|1291|4638|5914|7422	COL3A1|COL6A1|MYLK|RARA|VEGFA	-2.57856	0	61	0	0	-7.19228	65.1736
0	1	0	0	1	1	0	-2.01217	0	0	-2.14247	-4.52903	GO:0030097	M010011	3	0	GO Biological Processes	19	hemopoiesis	19_GO:0032502 developmental process	-8.2521	4.67861	7.90952	30284	690	197	21	10.6599	2.1987	920|1265|1880|2064|2194|2207|2316|2625|3561|5468|5788|6097|6422|6591|6659|7037|7153|7163|7422|9833|54443	CD4|CNN2|GPR183|ERBB2|FASN|FCER1G|FLNA|GATA3|IL2RG|PPARG|PTPRC|RORC|SFRP1|SNAI2|SOX4|TFRC|TOP2A|TPD52|VEGFA|MELK|ANLN	-5.97221	0	6	0	0	-17.3513	8.35467
0	1	0	0	0	0	0	-2.00156	0	0	0	0	GO:0009895	M010000	1	0	GO Biological Processes	19	negative regulation of catabolic process	19_GO:0048519 negative regulation of biological process	-2.00156	6.72729	3.85018	30284	365	37	3	8.10811	4.48743	341|2316|7076	APOC1|FLNA|TIMP1	-0.98837	0	20	0	0	-10.208	81.8486
0	0	0	0	1	0	0	0	0	0	-23.7138	0	M5901	M000010	1	0	Hallmark Gene Sets	23	HALLMARK G2M CHECKPOINT		-23.7138	66.8029	31.3018	30284	200	34	15	44.1176	8.51538	332|990|991|1063|3159|4288|4605|6790|7153|9156|9232|10403|11004|11065|23594	BIRC5|CDC6|CDC20|CENPF|HMGA1|MKI67|MYBL2|AURKA|TOP2A|EXO1|PTTG1|NDC80|KIF2C|UBE2C|ORC6	-19.735	0	2	1	1	-23.7138	190.866
0	0	0	0	1	0	0	0	0	0	-20.0155	0	R-HSA-1640170	M000010	1	0	Reactome Gene Sets	6	Cell Cycle		-20.0155	25.9281	20.3936	30284	584	34	17	50	8.57493	891|990|991|1063|4193|4605|6241|6790|7153|7277|7298|9232|10403|11004|11065|23243|23594	CCNB1|CDC6|CDC20|CENPF|MDM2|MYBL2|RRM2|AURKA|TOP2A|TUBA4A|TYMS|PTTG1|NDC80|KIF2C|UBE2C|ANKRD28|ORC6	-16.4346	0	2	0	0	-23.7138	190.866
0	0	0	0	1	0	0	0	0	0	-18.1005	0	GO:0000278	M000010	1	0	GO Biological Processes	19	mitotic cell cycle	19_GO:0009987 cellular process	-18.1005	23.634	18.8216	30284	603	34	16	47.0588	8.56008	332|891|990|991|1063|1978|4193|4605|6790|7277|9833|10403|11004|11065|54443|55165	BIRC5|CCNB1|CDC6|CDC20|CENPF|EIF4EBP1|MDM2|MYBL2|AURKA|TUBA4A|MELK|NDC80|KIF2C|UBE2C|ANLN|CEP55	-14.6658	0	2	0	0	-23.7138	190.866
0	0	0	0	1	0	0	0	0	0	-18.0131	0	R-HSA-69278	M000010	1	0	Reactome Gene Sets	6	Cell Cycle, Mitotic		-18.0131	28.1276	19.9784	30284	475	34	15	44.1176	8.51538	891|990|991|1063|4605|6241|6790|7153|7277|7298|9232|10403|11004|11065|23594	CCNB1|CDC6|CDC20|CENPF|MYBL2|RRM2|AURKA|TOP2A|TUBA4A|TYMS|PTTG1|NDC80|KIF2C|UBE2C|ORC6	-14.6363	0	2	0	0	-23.7138	190.866
0	0	0	0	1	0	0	0	0	0	-17.3894	0	GO:1903047	M000010	1	0	GO Biological Processes	19	mitotic cell cycle process	19_GO:0009987 cellular process	-17.3894	25.5461	18.9839	30284	523	34	15	44.1176	8.51538	332|891|990|991|1063|1978|4193|4605|6790|9833|10403|11004|11065|54443|55165	BIRC5|CCNB1|CDC6|CDC20|CENPF|EIF4EBP1|MDM2|MYBL2|AURKA|MELK|NDC80|KIF2C|UBE2C|ANLN|CEP55	-14.0638	0	2	0	0	-23.7138	190.866
0	0	0	0	1	0	0	0	0	0	-14.9151	0	GO:0007059	M000010	1	0	GO Biological Processes	19	chromosome segregation	19_GO:0009987 cellular process	-14.9151	31.9059	19.0699	30284	335	34	12	35.2941	8.19565	332|891|991|1063|4288|4605|6732|6790|7153|9232|10403|11004	BIRC5|CCNB1|CDC20|CENPF|MKI67|MYBL2|SRPK1|AURKA|TOP2A|PTTG1|NDC80|KIF2C	-11.7813	0	2	0	0	-23.7138	190.866
0	0	0	0	1	0	0	0	0	0	-14.1663	0	GO:0051301	M000010	1	0	GO Biological Processes	19	cell division	19_GO:0009987 cellular process	-14.1663	22.1823	16.3664	30284	522	34	13	38.2353	8.33418	332|891|990|991|1063|6790|7153|9232|10403|11004|11065|54443|55165	BIRC5|CCNB1|CDC6|CDC20|CENPF|AURKA|TOP2A|PTTG1|NDC80|KIF2C|UBE2C|ANLN|CEP55	-11.0905	0	2	0	0	-23.7138	190.866
0	0	0	0	1	0	0	0	0	0	-14.0503	0	GO:0007346	M000010	1	0	GO Biological Processes	19	regulation of mitotic cell cycle	19_GO:0050789 regulation of biological process	-14.0503	21.7245	16.1836	30284	533	34	13	38.2353	8.33418	332|891|990|991|1063|1978|4193|4288|6241|6790|10403|11065|54443	BIRC5|CCNB1|CDC6|CDC20|CENPF|EIF4EBP1|MDM2|MKI67|RRM2|AURKA|NDC80|UBE2C|ANLN	-11.0008	0	2	0	0	-23.7138	190.866
0	0	0	0	1	0	0	0	0	0	-13.5673	0	GO:0045931	M000010	1	0	GO Biological Processes	19	positive regulation of mitotic cell cycle	19_GO:0048518 positive regulation of biological process	-13.5673	58.9438	22.7051	30284	136	34	9	26.4706	7.56611	332|891|990|991|1978|4193|6241|6790|11065	BIRC5|CCNB1|CDC6|CDC20|EIF4EBP1|MDM2|RRM2|AURKA|UBE2C	-10.6096	0	2	0	0	-23.7138	190.866
0	0	0	0	1	0	0	0	0	0	-13.5381	0	GO:0051983	M000010	1	0	GO Biological Processes	19	regulation of chromosome segregation	19_GO:0050789 regulation of biological process	-13.5381	58.5135	22.6196	30284	137	34	9	26.4706	7.56611	332|891|990|991|1063|4288|10403|11004|11065	BIRC5|CCNB1|CDC6|CDC20|CENPF|MKI67|NDC80|KIF2C|UBE2C	-10.6006	0	2	0	0	-23.7138	190.866
0	0	0	0	1	0	0	0	0	0	-13.1566	0	GO:0098813	M000010	1	0	GO Biological Processes	19	nuclear chromosome segregation	19_GO:0009987 cellular process	-13.1566	38.0644	19.0818	30284	234	34	10	29.4118	7.81425	332|891|991|1063|4605|6790|7153|9232|10403|11004	BIRC5|CCNB1|CDC20|CENPF|MYBL2|AURKA|TOP2A|PTTG1|NDC80|KIF2C	-10.2917	0	2	0	0	-23.7138	190.866
0	0	0	0	1	0	0	0	0	0	-12.7474	0	GO:1901990	M000010	1	0	GO Biological Processes	19	regulation of mitotic cell cycle phase transition	19_GO:0050789 regulation of biological process	-12.7474	26.4091	16.509	30284	371	34	11	32.3529	8.02309	332|891|990|991|1063|4193|6241|6790|10403|11065|54443	BIRC5|CCNB1|CDC6|CDC20|CENPF|MDM2|RRM2|AURKA|NDC80|UBE2C|ANLN	-9.98597	0	2	0	0	-23.7138	190.866
0	0	0	0	1	0	0	0	0	0	-12.0682	0	GO:0007088	M000010	1	0	GO Biological Processes	19	regulation of mitotic nuclear division	19_GO:0050789 regulation of biological process	-12.0682	58.8896	21.3911	30284	121	34	8	23.5294	7.27467	332|891|991|1063|4288|6790|10403|11065	BIRC5|CCNB1|CDC20|CENPF|MKI67|AURKA|NDC80|UBE2C	-9.31974	0	2	0	0	-23.7138	190.866
0	0	0	0	1	1	0	0	0	0	-11.9786	-2.04189	GO:0010564	M000011	2	0	GO Biological Processes	19	regulation of cell cycle process	19_GO:0050789 regulation of biological process	-11.9786	14.9216	13.1712	30284	776	34	13	38.2353	8.33418	332|891|990|991|1063|4193|4288|6241|6790|10403|11004|11065|54443	BIRC5|CCNB1|CDC6|CDC20|CENPF|MDM2|MKI67|RRM2|AURKA|NDC80|KIF2C|UBE2C|ANLN	-9.255	0	2	0	0	-23.7138	190.866
0	0	0	0	1	0	0	0	0	0	-11.8014	0	GO:0000280	M000010	1	0	GO Biological Processes	19	nuclear division	19_GO:0009987 cellular process	-11.8014	27.8346	16.1788	30284	320	34	10	29.4118	7.81425	332|891|991|4605|6790|7153|9232|10403|11004|11065	BIRC5|CCNB1|CDC20|MYBL2|AURKA|TOP2A|PTTG1|NDC80|KIF2C|UBE2C	-9.15498	0	2	0	0	-23.7138	190.866
0	0	0	0	1	0	0	0	0	0	-11.5353	0	GO:1901987	M000010	1	0	GO Biological Processes	19	regulation of cell cycle phase transition	19_GO:0050789 regulation of biological process	-11.5353	20.412	14.3724	30284	480	34	11	32.3529	8.02309	332|891|990|991|1063|4193|6241|6790|10403|11065|54443	BIRC5|CCNB1|CDC6|CDC20|CENPF|MDM2|RRM2|AURKA|NDC80|UBE2C|ANLN	-8.90859	0	2	0	0	-23.7138	190.866
0	0	0	0	1	1	0	0	0	0	-11.503	-2.08369	GO:0045787	M000011	2	0	GO Biological Processes	19	positive regulation of cell cycle	19_GO:0048518 positive regulation of biological process	-11.503	25.9681	15.5911	30284	343	34	10	29.4118	7.81425	332|891|990|991|1978|4193|6241|6790|10403|11065	BIRC5|CCNB1|CDC6|CDC20|EIF4EBP1|MDM2|RRM2|AURKA|NDC80|UBE2C	-8.88591	0	2	0	0	-23.7138	190.866
0	0	0	0	1	0	0	0	0	0	-11.4409	0	GO:0048285	M000010	1	0	GO Biological Processes	19	organelle fission	19_GO:0009987 cellular process	-11.4409	25.595	15.4709	30284	348	34	10	29.4118	7.81425	332|891|991|4605|6790|7153|9232|10403|11004|11065	BIRC5|CCNB1|CDC20|MYBL2|AURKA|TOP2A|PTTG1|NDC80|KIF2C|UBE2C	-8.86747	0	2	0	0	-23.7138	190.866
0	0	0	0	1	0	0	0	0	0	-11.3821	0	GO:0051783	M000010	1	0	GO Biological Processes	19	regulation of nuclear division	19_GO:0050789 regulation of biological process	-11.3821	48.4738	19.3437	30284	147	34	8	23.5294	7.27467	332|891|991|1063|4288|6790|10403|11065	BIRC5|CCNB1|CDC20|CENPF|MKI67|AURKA|NDC80|UBE2C	-8.83896	0	2	0	0	-23.7138	190.866
0	0	0	0	1	0	0	0	0	0	-11.3785	0	R-HSA-69620	M000010	1	0	Reactome Gene Sets	6	Cell Cycle Checkpoints		-11.3785	33.8243	17.0077	30284	237	34	9	26.4706	7.56611	891|990|991|1063|4193|10403|11004|11065|23594	CCNB1|CDC6|CDC20|CENPF|MDM2|NDC80|KIF2C|UBE2C|ORC6	-8.83896	0	2	0	0	-23.7138	190.866
0	0	0	0	1	0	0	0	0	0	-11.2427	0	GO:0051276	M000010	1	0	GO Biological Processes	19	chromosome organization	19_GO:0009987 cellular process	-11.2427	19.1737	13.8905	30284	511	34	11	32.3529	8.02309	332|891|991|1063|3159|4605|7153|9156|9232|10403|11004	BIRC5|CCNB1|CDC20|CENPF|HMGA1|MYBL2|TOP2A|EXO1|PTTG1|NDC80|KIF2C	-8.73309	0	2	0	0	-23.7138	190.866
0	0	0	0	1	0	0	0	0	0	-11.107	0	GO:0044770	M000010	1	0	GO Biological Processes	19	cell cycle phase transition	19_GO:0009987 cellular process	-11.107	44.8154	18.5711	30284	159	34	8	23.5294	7.27467	332|891|991|1978|6790|9833|10403|11065	BIRC5|CCNB1|CDC20|EIF4EBP1|AURKA|MELK|NDC80|UBE2C	-8.6124	0	2	0	0	-23.7138	190.866
0	0	0	0	1	0	0	0	0	0	-10.9877	0	GO:0030071	M000010	1	0	GO Biological Processes	19	regulation of mitotic metaphase/anaphase transition	19_GO:0050789 regulation of biological process	-10.9877	67.0424	21.3846	30284	93	34	7	20.5882	6.93446	332|891|990|991|1063|10403|11065	BIRC5|CCNB1|CDC6|CDC20|CENPF|NDC80|UBE2C	-8.50712	0	2	0	0	-23.7138	190.866
0	0	0	0	1	0	0	0	0	0	-10.9144	0	GO:0140014	M000010	1	0	GO Biological Processes	19	mitotic nuclear division	19_GO:0009987 cellular process	-10.9144	42.4146	18.0462	30284	168	34	8	23.5294	7.27467	332|891|991|4605|6790|10403|11004|11065	BIRC5|CCNB1|CDC20|MYBL2|AURKA|NDC80|KIF2C|UBE2C	-8.44746	0	2	0	0	-23.7138	190.866
0	0	0	0	1	0	0	0	0	0	-10.889	0	GO:1902099	M000010	1	0	GO Biological Processes	19	regulation of metaphase/anaphase transition of cell cycle	19_GO:0050789 regulation of biological process	-10.889	64.9473	21.0386	30284	96	34	7	20.5882	6.93446	332|891|990|991|1063|10403|11065	BIRC5|CCNB1|CDC6|CDC20|CENPF|NDC80|UBE2C	-8.42861	0	2	0	0	-23.7138	190.866
0	0	0	0	1	1	0	0	0	0	-10.8285	-2.42994	GO:0090068	M000011	2	0	GO Biological Processes	19	positive regulation of cell cycle process	19_GO:0048518 positive regulation of biological process	-10.8285	29.3639	15.7828	30284	273	34	9	26.4706	7.56611	332|891|990|991|4193|6241|6790|10403|11065	BIRC5|CCNB1|CDC6|CDC20|MDM2|RRM2|AURKA|NDC80|UBE2C	-8.38116	0	2	0	0	-23.7138	190.866
0	0	0	0	1	0	0	0	0	0	-10.6111	0	GO:1901992	M000010	1	0	GO Biological Processes	19	positive regulation of mitotic cell cycle phase transition	19_GO:0048518 positive regulation of biological process	-10.6111	59.3804	20.0903	30284	105	34	7	20.5882	6.93446	332|891|990|991|4193|6241|11065	BIRC5|CCNB1|CDC6|CDC20|MDM2|RRM2|UBE2C	-8.18244	0	2	0	0	-23.7138	190.866
0	0	0	0	1	0	0	0	0	0	-10.5596	0	R-HSA-68882	M000010	1	0	Reactome Gene Sets	6	Mitotic Anaphase		-10.5596	38.3099	17.1115	30284	186	34	8	23.5294	7.27467	891|991|1063|7277|9232|10403|11004|11065	CCNB1|CDC20|CENPF|TUBA4A|PTTG1|NDC80|KIF2C|UBE2C	-8.14892	0	2	0	0	-23.7138	190.866
0	0	0	0	1	0	0	0	0	0	-10.5409	0	R-HSA-2555396	M000010	1	0	Reactome Gene Sets	6	Mitotic Metaphase and Anaphase		-10.5409	38.1051	17.0635	30284	187	34	8	23.5294	7.27467	891|991|1063|7277|9232|10403|11004|11065	CCNB1|CDC20|CENPF|TUBA4A|PTTG1|NDC80|KIF2C|UBE2C	-8.14185	0	2	0	0	-23.7138	190.866
0	0	0	0	1	0	0	0	0	0	-10.5239	0	GO:0033045	M000010	1	0	GO Biological Processes	19	regulation of sister chromatid segregation	19_GO:0050789 regulation of biological process	-10.5239	57.7309	19.8005	30284	108	34	7	20.5882	6.93446	332|891|990|991|1063|10403|11065	BIRC5|CCNB1|CDC6|CDC20|CENPF|NDC80|UBE2C	-8.13053	0	2	0	0	-23.7138	190.866
0	0	0	0	1	0	0	0	0	0	-10.3248	0	M5893	M000010	1	0	Hallmark Gene Sets	23	HALLMARK MITOTIC SPINDLE		-10.3248	35.8073	16.5157	30284	199	34	8	23.5294	7.27467	332|1063|6790|7153|7277|10403|11004|54443	BIRC5|CENPF|AURKA|TOP2A|TUBA4A|NDC80|KIF2C|ANLN	-7.97495	0	2	0	0	-23.7138	190.866
0	0	0	0	1	0	0	0	0	0	-10.1316	0	GO:0010965	M000010	1	0	GO Biological Processes	19	regulation of mitotic sister chromatid separation	19_GO:0050789 regulation of biological process	-10.1316	86.1973	22.5132	30284	62	34	6	17.6471	6.53787	332|891|991|1063|10403|11065	BIRC5|CCNB1|CDC20|CENPF|NDC80|UBE2C	-7.81055	0	2	0	0	-23.7138	190.866
0	0	0	0	1	1	0	0	0	0	-10.0489	-2.50284	GO:1901989	M000011	2	0	GO Biological Processes	19	positive regulation of cell cycle phase transition	19_GO:0048518 positive regulation of biological process	-10.0489	49.4837	18.2833	30284	126	34	7	20.5882	6.93446	332|891|990|991|4193|6241|11065	BIRC5|CCNB1|CDC6|CDC20|MDM2|RRM2|UBE2C	-7.73278	0	2	0	0	-23.7138	190.866
0	0	0	0	1	0	0	0	0	0	-9.59756	0	GO:0000819	M000010	1	0	GO Biological Processes	19	sister chromatid segregation	19_GO:0009987 cellular process	-9.59756	42.7051	16.935	30284	146	34	7	20.5882	6.93446	332|891|991|4605|7153|10403|11004	BIRC5|CCNB1|CDC20|MYBL2|TOP2A|NDC80|KIF2C	-7.32627	0	2	0	0	-23.7138	190.866
0	0	0	0	1	0	0	0	0	0	-9.59186	0	GO:0033044	M000010	1	0	GO Biological Processes	19	regulation of chromosome organization	19_GO:0050789 regulation of biological process	-9.59186	28.966	14.7652	30284	246	34	8	23.5294	7.27467	332|891|990|991|1063|7153|10403|11065	BIRC5|CCNB1|CDC6|CDC20|CENPF|TOP2A|NDC80|UBE2C	-7.3248	0	2	0	0	-23.7138	190.866
0	0	0	0	1	0	0	0	0	0	-9.55058	0	GO:1905818	M000010	1	0	GO Biological Processes	19	regulation of chromosome separation	19_GO:0050789 regulation of biological process	-9.55058	69.4057	20.1493	30284	77	34	6	17.6471	6.53787	332|891|991|1063|10403|11065	BIRC5|CCNB1|CDC20|CENPF|NDC80|UBE2C	-7.29599	0	2	0	0	-23.7138	190.866
0	0	0	0	1	0	0	0	0	0	-9.51504	0	R-HSA-2467813	M000010	1	0	Reactome Gene Sets	6	Separation of Sister Chromatids		-9.51504	41.5663	16.6978	30284	150	34	7	20.5882	6.93446	991|1063|7277|9232|10403|11004|11065	CDC20|CENPF|TUBA4A|PTTG1|NDC80|KIF2C|UBE2C	-7.26857	0	2	0	0	-23.7138	190.866
0	0	0	0	1	0	0	0	0	0	-9.35663	0	hsa04110	M000010	1	0	KEGG Pathway	24	Cell cycle		-9.35663	39.4617	16.2503	30284	158	34	7	20.5882	6.93446	891|990|991|4193|9232|10403|23594	CCNB1|CDC6|CDC20|MDM2|PTTG1|NDC80|ORC6	-7.14119	0	2	0	0	-23.7138	190.866
0	0	0	0	1	0	0	0	0	0	-9.28758	0	GO:0000226	M000010	1	0	GO Biological Processes	19	microtubule cytoskeleton organization	19_GO:0009987 cellular process	-9.28758	15.4101	11.727	30284	578	34	10	29.4118	7.81425	332|891|991|2597|4605|6790|7277|9768|10403|11004	BIRC5|CCNB1|CDC20|GAPDH|MYBL2|AURKA|TUBA4A|PCLAF|NDC80|KIF2C	-7.08966	0	2	0	0	-23.7138	190.866
0	0	0	0	1	0	0	0	0	0	-8.88366	0	GO:0007052	M000010	1	0	GO Biological Processes	19	mitotic spindle organization	19_GO:0009987 cellular process	-8.88366	53.9822	17.7022	30284	99	34	6	17.6471	6.53787	332|891|991|4605|6790|10403	BIRC5|CCNB1|CDC20|MYBL2|AURKA|NDC80	-6.72104	0	2	0	0	-23.7138	190.866
0	0	0	0	1	0	0	0	0	0	-8.67883	0	R-HSA-2500257	M000010	1	0	Reactome Gene Sets	6	Resolution of Sister Chromatid Cohesion		-8.67883	49.9461	17.0039	30284	107	34	6	17.6471	6.53787	891|991|1063|7277|10403|11004	CCNB1|CDC20|CENPF|TUBA4A|NDC80|KIF2C	-6.53881	0	2	0	0	-23.7138	190.866
0	0	0	0	1	0	0	0	0	0	-8.37771	0	WP179	M000010	1	0	WikiPathways	27	Cell cycle		-8.37771	44.5353	16.02	30284	120	34	6	17.6471	6.53787	891|990|991|4193|9232|23594	CCNB1|CDC6|CDC20|MDM2|PTTG1|ORC6	-6.26217	0	2	0	0	-23.7138	190.866
0	0	0	0	1	0	0	0	0	0	-8.35821	0	GO:0044839	M000010	1	0	GO Biological Processes	19	cell cycle G2/M phase transition	19_GO:0009987 cellular process	-8.35821	80.9733	19.9017	30284	55	34	5	14.7059	6.07387	332|891|6790|9833|10403	BIRC5|CCNB1|AURKA|MELK|NDC80	-6.24564	0	2	0	0	-23.7138	190.866
0	0	0	0	1	0	0	0	0	0	-8.348	0	R-HSA-68886	M000010	1	0	Reactome Gene Sets	6	M Phase		-8.348	20.1289	12.1371	30284	354	34	8	23.5294	7.27467	891|991|1063|7277|9232|10403|11004|11065	CCNB1|CDC20|CENPF|TUBA4A|PTTG1|NDC80|KIF2C|UBE2C	-6.23836	0	2	0	0	-23.7138	190.866
0	0	0	0	1	0	0	0	0	0	-8.23961	0	GO:0033047	M000010	1	0	GO Biological Processes	19	regulation of mitotic sister chromatid segregation	19_GO:0050789 regulation of biological process	-8.23961	76.785	19.3679	30284	58	34	5	14.7059	6.07387	332|891|991|1063|10403	BIRC5|CCNB1|CDC20|CENPF|NDC80	-6.15562	0	2	0	0	-23.7138	190.866
0	0	0	0	1	0	0	0	0	0	-8.1087	0	GO:0007093	M000010	1	0	GO Biological Processes	19	mitotic cell cycle checkpoint signaling	19_GO:0048519 negative regulation of biological process	-8.1087	40.1822	15.1824	30284	133	34	6	17.6471	6.53787	332|990|991|1063|4193|10403	BIRC5|CDC6|CDC20|CENPF|MDM2|NDC80	-6.04892	0	2	0	0	-23.7138	190.866
0	0	0	0	1	0	0	0	0	0	-8.06975	0	GO:1902850	M000010	1	0	GO Biological Processes	19	microtubule cytoskeleton organization involved in mitosis	19_GO:0009987 cellular process	-8.06975	39.5869	15.0642	30284	135	34	6	17.6471	6.53787	332|891|991|4605|6790|10403	BIRC5|CCNB1|CDC20|MYBL2|AURKA|NDC80	-6.01517	0	2	0	0	-23.7138	190.866
0	0	0	0	1	0	0	0	0	0	-7.938	0	GO:0000070	M000010	1	0	GO Biological Processes	19	mitotic sister chromatid segregation	19_GO:0009987 cellular process	-7.938	37.6355	14.6702	30284	142	34	6	17.6471	6.53787	332|891|991|4605|10403|11004	BIRC5|CCNB1|CDC20|MYBL2|NDC80|KIF2C	-5.91338	0	2	0	0	-23.7138	190.866
0	0	0	1	1	0	0	0	0	-4.11586	-6.95501	0	GO:0140694	M000110	2	0	GO Biological Processes	19	membraneless organelle assembly	19_GO:0009987 cellular process	-7.91512	6.55082	8.47625	30284	352	197	15	7.61421	1.88965	332|367|991|1063|2316|2886|3856|3880|4604|4605|5728|6713|6790|10403|54443	BIRC5|AR|CDC20|CENPF|FLNA|GRB7|KRT8|KRT19|MYBPC1|MYBL2|PTEN|SQLE|AURKA|NDC80|ANLN	-5.71077	0	2	0	0	-23.7138	190.866
0	0	0	0	1	0	0	0	0	0	-7.8657	0	GO:0044772	M000010	1	0	GO Biological Processes	19	mitotic cell cycle phase transition	19_GO:0009987 cellular process	-7.8657	36.6044	14.4577	30284	146	34	6	17.6471	6.53787	332|891|1978|6790|9833|11065	BIRC5|CCNB1|EIF4EBP1|AURKA|MELK|UBE2C	-5.84826	0	2	0	0	-23.7138	190.866
0	0	0	0	1	0	0	0	0	0	-7.48621	0	GO:0000075	M000010	1	0	GO Biological Processes	19	cell cycle checkpoint signaling	19_GO:0048519 negative regulation of biological process	-7.48621	31.6227	13.3836	30284	169	34	6	17.6471	6.53787	332|990|991|1063|4193|10403	BIRC5|CDC6|CDC20|CENPF|MDM2|NDC80	-5.52019	0	2	0	0	-23.7138	190.866
0	0	0	0	1	0	0	0	0	0	-7.48621	0	GO:0007051	M000010	1	0	GO Biological Processes	19	spindle organization	19_GO:0009987 cellular process	-7.48621	31.6227	13.3836	30284	169	34	6	17.6471	6.53787	332|891|991|4605|6790|10403	BIRC5|CCNB1|CDC20|MYBL2|AURKA|NDC80	-5.52019	0	2	0	0	-23.7138	190.866
0	0	0	0	1	0	0	0	0	0	-7.47307	0	GO:2001251	M000010	1	0	GO Biological Processes	19	negative regulation of chromosome organization	19_GO:0048519 negative regulation of biological process	-7.47307	54.3113	16.2063	30284	82	34	5	14.7059	6.07387	332|991|1063|7153|10403	BIRC5|CDC20|CENPF|TOP2A|NDC80	-5.50915	0	2	0	0	-23.7138	190.866
0	0	0	0	1	0	0	0	0	0	-7.44939	0	GO:0007094	M000010	1	0	GO Biological Processes	19	mitotic spindle assembly checkpoint signaling	19_GO:0048519 negative regulation of biological process	-7.44939	118.761	21.6345	30284	30	34	4	11.7647	5.52551	332|991|1063|10403	BIRC5|CDC20|CENPF|NDC80	-5.49583	0	2	0	0	-23.7138	190.866
0	0	0	0	1	0	0	0	0	0	-7.44939	0	GO:0071173	M000010	1	0	GO Biological Processes	19	spindle assembly checkpoint signaling	19_GO:0048519 negative regulation of biological process	-7.44939	118.761	21.6345	30284	30	34	4	11.7647	5.52551	332|991|1063|10403	BIRC5|CDC20|CENPF|NDC80	-5.49583	0	2	0	0	-23.7138	190.866
0	0	0	0	1	0	0	0	0	0	-7.44939	0	GO:0071174	M000010	1	0	GO Biological Processes	19	mitotic spindle checkpoint signaling	19_GO:0048519 negative regulation of biological process	-7.44939	118.761	21.6345	30284	30	34	4	11.7647	5.52551	332|991|1063|10403	BIRC5|CDC20|CENPF|NDC80	-5.49583	0	2	0	0	-23.7138	190.866
0	0	0	0	1	0	0	0	0	0	-7.42573	0	R-HSA-68877	M000010	1	0	Reactome Gene Sets	6	Mitotic Prometaphase		-7.42573	30.8915	13.2186	30284	173	34	6	17.6471	6.53787	891|991|1063|7277|10403|11004	CCNB1|CDC20|CENPF|TUBA4A|NDC80|KIF2C	-5.47625	0	2	0	0	-23.7138	190.866
0	0	0	0	1	0	0	0	0	0	-7.38973	0	GO:0031577	M000010	1	0	GO Biological Processes	19	spindle checkpoint signaling	19_GO:0048519 negative regulation of biological process	-7.38973	114.93	21.277	30284	31	34	4	11.7647	5.52551	332|991|1063|10403	BIRC5|CDC20|CENPF|NDC80	-5.44429	0	2	0	0	-23.7138	190.866
0	0	0	0	1	0	0	0	0	0	-7.27631	0	GO:0033046	M000010	1	0	GO Biological Processes	19	negative regulation of sister chromatid segregation	19_GO:0048519 negative regulation of biological process	-7.27631	107.964	20.6112	30284	33	34	4	11.7647	5.52551	332|991|1063|10403	BIRC5|CDC20|CENPF|NDC80	-5.35053	0	2	0	0	-23.7138	190.866
0	0	0	0	1	0	0	0	0	0	-7.27631	0	GO:0033048	M000010	1	0	GO Biological Processes	19	negative regulation of mitotic sister chromatid segregation	19_GO:0048519 negative regulation of biological process	-7.27631	107.964	20.6112	30284	33	34	4	11.7647	5.52551	332|991|1063|10403	BIRC5|CDC20|CENPF|NDC80	-5.35053	0	2	0	0	-23.7138	190.866
0	0	0	0	1	0	0	0	0	0	-7.27631	0	GO:0045841	M000010	1	0	GO Biological Processes	19	negative regulation of mitotic metaphase/anaphase transition	19_GO:0048519 negative regulation of biological process	-7.27631	107.964	20.6112	30284	33	34	4	11.7647	5.52551	332|991|1063|10403	BIRC5|CDC20|CENPF|NDC80	-5.35053	0	2	0	0	-23.7138	190.866
0	0	0	0	1	0	0	0	0	0	-7.27631	0	GO:2000816	M000010	1	0	GO Biological Processes	19	negative regulation of mitotic sister chromatid separation	19_GO:0048519 negative regulation of biological process	-7.27631	107.964	20.6112	30284	33	34	4	11.7647	5.52551	332|991|1063|10403	BIRC5|CDC20|CENPF|NDC80	-5.35053	0	2	0	0	-23.7138	190.866
0	0	0	0	1	0	0	0	0	0	-7.19706	0	R-HSA-69618	M000010	1	0	Reactome Gene Sets	6	Mitotic Spindle Checkpoint		-7.19706	47.8874	15.1822	30284	93	34	5	14.7059	6.07387	991|1063|10403|11004|11065	CDC20|CENPF|NDC80|KIF2C|UBE2C	-5.277	0	2	0	0	-23.7138	190.866
0	0	0	0	1	0	0	0	0	0	-7.17039	0	GO:1901991	M000010	1	0	GO Biological Processes	19	negative regulation of mitotic cell cycle phase transition	19_GO:0048519 negative regulation of biological process	-7.17039	27.9803	12.5403	30284	191	34	6	17.6471	6.53787	332|990|991|1063|4193|10403	BIRC5|CDC6|CDC20|CENPF|MDM2|NDC80	-5.26295	0	2	0	0	-23.7138	190.866
0	0	0	0	1	0	0	0	0	0	-7.16994	0	GO:1902100	M000010	1	0	GO Biological Processes	19	negative regulation of metaphase/anaphase transition of cell cycle	19_GO:0048519 negative regulation of biological process	-7.16994	101.795	20.0029	30284	35	34	4	11.7647	5.52551	332|991|1063|10403	BIRC5|CDC20|CENPF|NDC80	-5.26295	0	2	0	0	-23.7138	190.866
0	0	0	0	1	0	0	0	0	0	-7.16994	0	GO:1905819	M000010	1	0	GO Biological Processes	19	negative regulation of chromosome separation	19_GO:0048519 negative regulation of biological process	-7.16994	101.795	20.0029	30284	35	34	4	11.7647	5.52551	332|991|1063|10403	BIRC5|CDC20|CENPF|NDC80	-5.26295	0	2	0	0	-23.7138	190.866
0	0	0	0	1	0	0	0	0	0	-7.12765	0	GO:0051303	M000010	1	0	GO Biological Processes	19	establishment of chromosome localization	19_GO:0051179 localization	-7.12765	46.3909	14.9336	30284	96	34	5	14.7059	6.07387	332|891|1063|10403|11004	BIRC5|CCNB1|CENPF|NDC80|KIF2C	-5.22433	0	2	0	0	-23.7138	190.866
0	0	0	0	1	0	0	0	0	0	-7.11913	0	GO:0051985	M000010	1	0	GO Biological Processes	19	negative regulation of chromosome segregation	19_GO:0048519 negative regulation of biological process	-7.11913	98.9673	19.7179	30284	36	34	4	11.7647	5.52551	332|991|1063|10403	BIRC5|CDC20|CENPF|NDC80	-5.21763	0	2	0	0	-23.7138	190.866
0	0	0	0	1	0	0	0	0	0	-7.06045	0	R-HSA-9648025	M000010	1	0	Reactome Gene Sets	6	EML4 and NUDC in mitotic spindle formation		-7.06045	44.9851	14.6962	30284	99	34	5	14.7059	6.07387	991|1063|7277|10403|11004	CDC20|CENPF|TUBA4A|NDC80|KIF2C	-5.16617	0	2	0	0	-23.7138	190.866
0	0	0	0	1	0	0	0	0	0	-6.97517	0	M14	M000010	1	0	Canonical Pathways	11	PID AURORA B PATHWAY		-6.97517	91.3544	18.9292	30284	39	34	4	11.7647	5.52551	332|6790|10403|11004	BIRC5|AURKA|NDC80|KIF2C	-5.08797	0	2	0	0	-23.7138	190.866
0	0	0	0	1	0	0	0	0	0	-6.95302	0	GO:0050000	M000010	1	0	GO Biological Processes	19	chromosome localization	19_GO:0051179 localization	-6.95302	42.8224	14.3233	30284	104	34	5	14.7059	6.07387	332|891|1063|10403|11004	BIRC5|CCNB1|CENPF|NDC80|KIF2C	-5.07453	0	2	0	0	-23.7138	190.866
0	0	0	0	1	0	0	0	0	0	-6.95302	0	GO:0051225	M000010	1	0	GO Biological Processes	19	spindle assembly	19_GO:0009987 cellular process	-6.95302	42.8224	14.3233	30284	104	34	5	14.7059	6.07387	332|991|4605|6790|10403	BIRC5|CDC20|MYBL2|AURKA|NDC80	-5.07453	0	2	0	0	-23.7138	190.866
0	0	0	0	1	0	0	0	0	0	-6.88552	0	GO:0045839	M000010	1	0	GO Biological Processes	19	negative regulation of mitotic nuclear division	19_GO:0048519 negative regulation of biological process	-6.88552	86.8981	18.4518	30284	41	34	4	11.7647	5.52551	332|991|1063|10403	BIRC5|CDC20|CENPF|NDC80	-5.01569	0	2	0	0	-23.7138	190.866
0	0	0	0	1	0	0	0	0	0	-6.697	0	R-HSA-5663220	M000010	1	0	Reactome Gene Sets	6	RHO GTPases Activate Formins		-6.697	38.0644	13.4666	30284	117	34	5	14.7059	6.07387	991|1063|7277|10403|11004	CDC20|CENPF|TUBA4A|NDC80|KIF2C	-4.85008	0	2	0	0	-23.7138	190.866
0	0	0	0	1	0	0	0	0	0	-6.68004	0	M129	M000010	1	0	Canonical Pathways	11	PID PLK1 PATHWAY		-6.68004	77.4527	17.3969	30284	46	34	4	11.7647	5.52551	891|991|6790|10403	CCNB1|CDC20|AURKA|NDC80	-4.8379	0	2	0	0	-23.7138	190.866
0	0	0	0	1	0	0	0	0	0	-6.64176	0	GO:0051784	M000010	1	0	GO Biological Processes	19	negative regulation of nuclear division	19_GO:0048519 negative regulation of biological process	-6.64176	75.8048	17.2062	30284	47	34	4	11.7647	5.52551	332|991|1063|10403	BIRC5|CDC20|CENPF|NDC80	-4.80707	0	2	0	0	-23.7138	190.866
0	0	0	0	1	0	0	0	0	0	-6.58516	0	GO:0045930	M000010	1	0	GO Biological Processes	19	negative regulation of mitotic cell cycle	19_GO:0048519 negative regulation of biological process	-6.58516	22.2676	11.0898	30284	240	34	6	17.6471	6.53787	332|990|991|1063|4193|10403	BIRC5|CDC6|CDC20|CENPF|MDM2|NDC80	-4.75705	0	2	0	0	-23.7138	190.866
0	0	0	0	1	0	0	0	0	0	-6.53181	0	GO:0000086	M000010	1	0	GO Biological Processes	19	G2/M transition of mitotic cell cycle	19_GO:0009987 cellular process	-6.53181	71.2565	16.6686	30284	50	34	4	11.7647	5.52551	332|891|6790|9833	BIRC5|CCNB1|AURKA|MELK	-4.7158	0	2	0	0	-23.7138	190.866
0	0	0	0	1	0	0	0	0	0	-6.42079	0	GO:1901988	M000010	1	0	GO Biological Processes	19	negative regulation of cell cycle phase transition	19_GO:0048519 negative regulation of biological process	-6.42079	20.8759	10.7068	30284	256	34	6	17.6471	6.53787	332|990|991|1063|4193|10403	BIRC5|CDC6|CDC20|CENPF|MDM2|NDC80	-4.62489	0	2	0	0	-23.7138	190.866
0	0	0	0	1	0	0	0	0	0	-6.33102	0	R-HSA-156711	M000010	1	0	Reactome Gene Sets	6	Polo-like kinase mediated events		-6.33102	190.866	23.8221	30284	14	34	3	8.82353	4.86433	891|1063|4605	CCNB1|CENPF|MYBL2	-4.55219	0	2	0	0	-23.7138	190.866
0	0	0	0	1	0	0	0	0	0	-6.06264	0	R-HSA-69275	M000010	1	0	Reactome Gene Sets	6	G2/M Transition		-6.06264	28.3664	11.5257	30284	157	34	5	14.7059	6.07387	891|1063|4605|6790|7277	CCNB1|CENPF|MYBL2|AURKA|TUBA4A	-4.32557	0	2	0	0	-23.7138	190.866
0	0	0	0	1	0	0	0	0	0	-6.03549	0	R-HSA-453274	M000010	1	0	Reactome Gene Sets	6	Mitotic G2-G2/M phases		-6.03549	28.0096	11.448	30284	159	34	5	14.7059	6.07387	891|1063|4605|6790|7277	CCNB1|CENPF|MYBL2|AURKA|TUBA4A	-4.3046	0	2	0	0	-23.7138	190.866
0	0	0	0	1	0	0	0	0	0	-5.99381	0	GO:0010948	M000010	1	0	GO Biological Processes	19	negative regulation of cell cycle process	19_GO:0048519 negative regulation of biological process	-5.99381	17.6377	9.75818	30284	303	34	6	17.6471	6.53787	332|990|991|1063|4193|10403	BIRC5|CDC6|CDC20|CENPF|MDM2|NDC80	-4.27022	0	2	0	0	-23.7138	190.866
0	0	0	0	1	0	0	0	0	0	-5.72727	0	R-HSA-141424	M000010	1	0	Reactome Gene Sets	6	Amplification of signal from the kinetochores		-5.72727	45.099	13.1577	30284	79	34	4	11.7647	5.52551	991|1063|10403|11004	CDC20|CENPF|NDC80|KIF2C	-4.04616	0	2	0	0	-23.7138	190.866
0	0	0	0	1	0	0	0	0	0	-5.72727	0	R-HSA-141444	M000010	1	0	Reactome Gene Sets	6	Amplification of signal from unattached kinetochores via a MAD2 inhibitory signal		-5.72727	45.099	13.1577	30284	79	34	4	11.7647	5.52551	991|1063|10403|11004	CDC20|CENPF|NDC80|KIF2C	-4.04616	0	2	0	0	-23.7138	190.866
0	0	0	0	1	0	0	0	0	0	-5.64574	0	GO:0010639	M000010	1	0	GO Biological Processes	19	negative regulation of organelle organization	19_GO:0048519 negative regulation of biological process	-5.64574	15.357	9.03093	30284	348	34	6	17.6471	6.53787	332|991|1063|7037|7153|10403	BIRC5|CDC20|CENPF|TFRC|TOP2A|NDC80	-3.97968	0	2	0	0	-23.7138	190.866
0	0	0	0	1	0	0	0	0	0	-5.6412	0	GO:0051310	M000010	1	0	GO Biological Processes	19	metaphase chromosome alignment	19_GO:0051179 localization	-5.6412	42.9256	12.8228	30284	83	34	4	11.7647	5.52551	891|1063|10403|11004	CCNB1|CENPF|NDC80|KIF2C	-3.97831	0	2	0	0	-23.7138	190.866
0	0	0	0	1	0	0	0	0	0	-5.58925	0	GO:0090266	M000010	1	0	GO Biological Processes	19	regulation of mitotic cell cycle spindle assembly checkpoint	19_GO:0048519 negative regulation of biological process	-5.58925	111.338	18.129	30284	24	34	3	8.82353	4.86433	332|891|10403	BIRC5|CCNB1|NDC80	-3.93978	0	2	0	0	-23.7138	190.866
0	0	0	0	1	0	0	0	0	0	-5.58925	0	GO:1903504	M000010	1	0	GO Biological Processes	19	regulation of mitotic spindle checkpoint	19_GO:0048519 negative regulation of biological process	-5.58925	111.338	18.129	30284	24	34	3	8.82353	4.86433	332|891|10403	BIRC5|CCNB1|NDC80	-3.93978	0	2	0	0	-23.7138	190.866
0	0	0	0	1	0	0	0	0	0	-5.53406	0	GO:0090231	M000010	1	0	GO Biological Processes	19	regulation of spindle checkpoint	19_GO:0048519 negative regulation of biological process	-5.53406	106.885	17.7563	30284	25	34	3	8.82353	4.86433	332|891|10403	BIRC5|CCNB1|NDC80	-3.89564	0	2	0	0	-23.7138	190.866
0	0	0	0	1	0	0	0	0	0	-5.34859	0	GO:0045786	M000010	1	0	GO Biological Processes	19	negative regulation of cell cycle	19_GO:0048519 negative regulation of biological process	-5.34859	13.6333	8.44028	30284	392	34	6	17.6471	6.53787	332|990|991|1063|4193|10403	BIRC5|CDC6|CDC20|CENPF|MDM2|NDC80	-3.74356	0	2	0	0	-23.7138	190.866
0	0	0	0	1	0	0	0	0	0	-4.90603	0	M176	M000010	1	0	Canonical Pathways	11	PID FOXM1 PATHWAY		-5.21794	19.2157	9.32825	30284	40	197	5	2.53807	1.12056	332|595|891|1063|4313	BIRC5|CCND1|CCNB1|CENPF|MMP2	-3.50507	0	2	0	0	-23.7138	190.866
0	0	0	0	1	0	0	0	0	0	-5.16908	0	GO:0010389	M000010	1	0	GO Biological Processes	19	regulation of G2/M transition of mitotic cell cycle	19_GO:0050789 regulation of biological process	-5.16908	32.6865	11.1107	30284	109	34	4	11.7647	5.52551	891|990|1063|6790	CCNB1|CDC6|CENPF|AURKA	-3.59075	0	2	0	0	-23.7138	190.866
0	0	0	0	1	0	0	0	0	0	-4.97522	0	GO:1902749	M000010	1	0	GO Biological Processes	19	regulation of cell cycle G2/M phase transition	19_GO:0050789 regulation of biological process	-4.97522	29.2035	10.4647	30284	122	34	4	11.7647	5.52551	891|990|1063|6790	CCNB1|CDC6|CENPF|AURKA	-3.42932	0	2	0	0	-23.7138	190.866
0	0	0	0	1	0	0	0	0	0	-4.85169	0	R-HSA-195258	M000010	1	0	Reactome Gene Sets	6	RHO GTPase Effectors		-4.85169	16.0199	8.43454	30284	278	34	5	14.7059	6.07387	991|1063|7277|10403|11004	CDC20|CENPF|TUBA4A|NDC80|KIF2C	-3.33146	0	2	0	0	-23.7138	190.866
0	0	0	0	1	0	0	0	0	0	-4.63841	0	GO:1901976	M000010	1	0	GO Biological Processes	19	regulation of cell cycle checkpoint	19_GO:0048519 negative regulation of biological process	-4.63841	54.533	12.5731	30284	49	34	3	8.82353	4.86433	332|891|10403	BIRC5|CCNB1|NDC80	-3.14455	0	2	0	0	-23.7138	190.866
0	0	0	0	1	0	0	0	0	0	-4.46333	0	GO:0007080	M000010	1	0	GO Biological Processes	19	mitotic metaphase chromosome alignment	19_GO:0051179 localization	-4.46333	47.7164	11.731	30284	56	34	3	8.82353	4.86433	891|10403|11004	CCNB1|NDC80|KIF2C	-3.00034	0	2	0	0	-23.7138	190.866
0	0	0	0	1	0	0	0	0	0	-4.11802	0	R-HSA-2565942	M000010	1	0	Reactome Gene Sets	6	Regulation of PLK1 Activity at G2/M Transition		-4.11802	36.6044	10.2108	30284	73	34	3	8.82353	4.86433	891|6790|7277	CCNB1|AURKA|TUBA4A	-2.72467	0	2	0	0	-23.7138	190.866
0	0	0	0	1	0	0	0	0	0	-3.97557	0	GO:0051656	M000010	1	0	GO Biological Processes	19	establishment of organelle localization	19_GO:0051179 localization	-3.97557	10.4789	6.59767	30284	425	34	5	14.7059	6.07387	332|891|1063|10403|11004	BIRC5|CCNB1|CENPF|NDC80|KIF2C	-2.61213	0	2	0	0	-23.7138	190.866
0	0	0	0	1	0	0	0	0	0	-3.45319	0	GO:0051640	M000010	1	0	GO Biological Processes	19	organelle localization	19_GO:0051179 localization	-3.45319	8.08263	5.62506	30284	551	34	5	14.7059	6.07387	332|891|1063|10403|11004	BIRC5|CCNB1|CENPF|NDC80|KIF2C	-2.18312	0	2	0	0	-23.7138	190.866
0	0	0	0	1	0	0	0	0	0	-21.6298	0	M5925	M000010	1	0	Hallmark Gene Sets	23	HALLMARK E2F TARGETS		-21.6298	62.3494	29.1833	30284	200	34	14	41.1765	8.44035	332|991|3159|4288|4605|6241|6790|7037|7153|9232|9833|11004|23594|29089	BIRC5|CDC20|HMGA1|MKI67|MYBL2|RRM2|AURKA|TFRC|TOP2A|PTTG1|MELK|KIF2C|ORC6|UBE2T	-17.9226	0	3	1	1	-21.6298	62.3494
0	0	0	0	0	1	0	0	0	0	0	-5.59121	GO:0043589	M000001	1	0	GO Biological Processes	19	skin morphogenesis	19_GO:0032502 developmental process	-6.08335	51.242	14.0857	30284	12	197	4	2.03046	1.00487	1277|1278|3655|8626	COL1A1|COL1A2|ITGA6|TP63	-4.18367	0	4	0	0	-18.8935	204.622
0	0	0	0	0	1	0	0	0	0	0	-4.58127	M274	M000001	1	0	Canonical Pathways	11	PID LYMPH ANGIOGENESIS PATHWAY		-4.58127	51.9154	12.2585	30284	25	70	3	4.28571	2.42076	1277|1278|5290	COL1A1|COL1A2|PIK3CA	-3.09795	0	4	0	0	-18.8935	204.622
0	0	1	0	0	1	0	0	-3.19552	0	0	-3.70068	GO:0042476	M001001	2	0	GO Biological Processes	19	odontogenesis	19_GO:0032502 developmental process	-3.70068	13.9558	6.95829	30284	124	70	4	5.71429	2.77431	1277|1278|2296|8626	COL1A1|COL1A2|FOXC1|TP63	-2.38598	0	4	0	0	-18.8935	204.622
0	0	0	0	0	1	0	0	0	0	0	-3.39187	GO:0030282	M000001	1	0	GO Biological Processes	19	bone mineralization	19_GO:0032502 developmental process	-3.39187	20.9336	7.5625	30284	62	70	3	4.28571	2.42076	1278|1291|5764	COL1A2|COL6A1|PTN	-2.13482	0	4	0	0	-18.8935	204.622
0	0	0	0	0	1	0	0	0	0	0	-2.59378	R-HSA-198933	M000001	1	0	Reactome Gene Sets	6	Immunoregulatory interactions between a Lymphoid and a non-Lymphoid cell		-2.59378	11.093	5.26494	30284	117	70	3	4.28571	2.42076	1277|1278|2214	COL1A1|COL1A2|FCGR3A	-1.49055	0	4	0	0	-18.8935	204.622
0	0	0	1	0	1	0	0	0	-2.06897	0	-10.939	GO:0045321	M000101	2	0	GO Biological Processes	19	leukocyte activation	19_GO:0002376 immune system process	-11.4295	5.89364	10.0113	30284	626	197	24	12.1827	2.33039	199|712|920|942|960|1524|1880|2064|2205|2207|2214|2625|3561|5788|6097|6659|7163|8754|9156|10875|22918|25800|57162|84868	AIF1|C1QA|CD4|CD86|CD44|CX3CR1|GPR183|ERBB2|FCER1A|FCER1G|FCGR3A|GATA3|IL2RG|PTPRC|RORC|SOX4|TPD52|ADAM9|EXO1|FGL2|CD93|SLC39A6|PELI1|HAVCR2	-8.52983	0	6	0	0	-17.3513	8.35467
0	0	0	1	0	1	0	0	0	-2.46063	0	-5.6178	GO:0046649	M000101	2	0	GO Biological Processes	19	lymphocyte activation	19_GO:0002376 immune system process	-7.40428	5.1852	7.66676	30284	504	197	17	8.62944	2.00061	920|942|960|1880|2064|2207|2214|2625|3561|5788|6097|6659|7163|9156|10875|25800|57162	CD4|CD86|CD44|GPR183|ERBB2|FCER1G|FCGR3A|GATA3|IL2RG|PTPRC|RORC|SOX4|TPD52|EXO1|FGL2|SLC39A6|PELI1	-5.27052	0	6	0	0	-17.3513	8.35467
0	0	0	0	0	1	0	0	0	0	0	-3.33829	GO:0002521	M000001	1	0	GO Biological Processes	19	leukocyte differentiation	19_GO:0032502 developmental process	-6.83109	5.41288	7.42233	30284	426	197	15	7.61421	1.88965	920|1880|2064|2194|2207|2625|3561|5468|5788|6097|6422|6659|7037|7163|7422	CD4|GPR183|ERBB2|FASN|FCER1G|GATA3|IL2RG|PPARG|PTPRC|RORC|SFRP1|SOX4|TFRC|TPD52|VEGFA	-4.81126	0	6	0	0	-17.3513	8.35467
0	0	0	0	0	1	0	0	0	0	0	-6.18343	GO:0002263	M000001	1	0	GO Biological Processes	19	cell activation involved in immune response	19_GO:0002376 immune system process	-6.75434	7.9018	8.19871	30284	214	197	11	5.58376	1.63589	1524|1880|2205|2207|2214|2625|6097|9156|10875|56892|84868	CX3CR1|GPR183|FCER1A|FCER1G|FCGR3A|GATA3|RORC|EXO1|FGL2|TCIM|HAVCR2	-4.74629	0	6	0	0	-17.3513	8.35467
0	0	0	1	0	1	0	0	0	-2.31198	0	-5.93102	GO:0042110	M000101	2	0	GO Biological Processes	19	T cell activation	19_GO:0002376 immune system process	-6.40642	5.89509	7.33401	30284	339	197	13	6.59898	1.76881	920|942|960|1880|2064|2207|2625|3561|5788|6097|6659|10875|57162	CD4|CD86|CD44|GPR183|ERBB2|FCER1G|GATA3|IL2RG|PTPRC|RORC|SOX4|FGL2|PELI1	-4.46895	0	6	0	0	-17.3513	8.35467
0	0	0	1	0	1	0	0	0	-2.22068	0	-2.82842	GO:1903131	M000101	2	0	GO Biological Processes	19	mononuclear cell differentiation	19_GO:0032502 developmental process	-6.1127	5.55121	7.02929	30284	360	197	13	6.59898	1.76881	920|1880|2064|2194|2207|2625|3561|5468|5788|6097|6659|7163|7422	CD4|GPR183|ERBB2|FASN|FCER1G|GATA3|IL2RG|PPARG|PTPRC|RORC|SOX4|TPD52|VEGFA	-4.20571	0	6	0	0	-17.3513	8.35467
0	0	0	1	0	1	0	0	0	-2.19301	0	-4.12845	GO:0030217	M000101	2	0	GO Biological Processes	19	T cell differentiation	19_GO:0002376 immune system process	-5.39092	7.39857	7.10208	30284	187	197	9	4.56853	1.48765	920|1880|2064|2207|2625|3561|5788|6097|6659	CD4|GPR183|ERBB2|FCER1G|GATA3|IL2RG|PTPRC|RORC|SOX4	-3.64277	0	6	0	0	-17.3513	8.35467
0	0	0	0	0	1	0	0	0	0	0	-2.20613	GO:0002573	M000001	1	0	GO Biological Processes	19	myeloid leukocyte differentiation	19_GO:0032502 developmental process	-4.95225	7.63855	6.83409	30284	161	197	8	4.06091	1.4063	920|1880|2194|2625|5468|6422|7037|7422	CD4|GPR183|FASN|GATA3|PPARG|SFRP1|TFRC|VEGFA	-3.27766	0	6	0	0	-17.3513	8.35467
0	0	0	0	0	1	0	0	0	0	0	-3.31594	GO:0030098	M000001	1	0	GO Biological Processes	19	lymphocyte differentiation	19_GO:0002376 immune system process	-4.7849	5.49021	6.108	30284	280	197	10	5.07614	1.56394	920|1880|2064|2207|2625|3561|5788|6097|6659|7163	CD4|GPR183|ERBB2|FCER1G|GATA3|IL2RG|PTPRC|RORC|SOX4|TPD52	-3.13237	0	6	0	0	-17.3513	8.35467
0	0	0	0	0	1	0	0	0	0	0	-3.41907	GO:0002285	M000001	1	0	GO Biological Processes	19	lymphocyte activation involved in immune response	19_GO:0002376 immune system process	-4.28124	7.32028	6.21567	30284	147	197	7	3.5533	1.31894	1880|2207|2214|2625|6097|9156|10875	GPR183|FCER1G|FCGR3A|GATA3|RORC|EXO1|FGL2	-2.71231	0	6	0	0	-17.3513	8.35467
0	0	0	0	0	1	0	0	0	0	0	-2.26029	GO:0030099	M000001	1	0	GO Biological Processes	19	myeloid cell differentiation	19_GO:0032502 developmental process	-3.73053	4.53617	5.02248	30284	305	197	9	4.56853	1.48765	920|1880|2194|2316|2625|5468|6422|7037|7422	CD4|GPR183|FASN|FLNA|GATA3|PPARG|SFRP1|TFRC|VEGFA	-2.23809	0	6	0	0	-17.3513	8.35467
0	0	0	0	0	1	0	0	0	0	0	-2.89217	GO:0002286	M000001	1	0	GO Biological Processes	19	T cell activation involved in immune response	19_GO:0002376 immune system process	-3.46312	8.35467	5.71682	30284	92	197	5	2.53807	1.12056	1880|2207|2625|6097|10875	GPR183|FCER1G|GATA3|RORC|FGL2	-2.01188	0	6	0	0	-17.3513	8.35467
0	0	0	1	0	1	0	0	0	-8.27806	0	-5.01813	R-HSA-6809371	M000101	2	0	Reactome Gene Sets	6	Formation of the cornified envelope		-10.5453	15.1206	12.6458	30284	122	197	12	6.09137	1.70403	1824|1832|3728|3852|3854|3855|3856|3858|3861|3872|3875|3880	DSC2|DSP|JUP|KRT5|KRT6B|KRT7|KRT8|KRT10|KRT14|KRT17|KRT18|KRT19	-7.7706	0	7	0	0	-16.2229	21.1038
0	0	0	1	0	1	0	0	0	-5.84955	0	-8.6133	GO:0045104	M000101	2	0	GO Biological Processes	19	intermediate filament cytoskeleton organization	19_GO:0009987 cellular process	-10.4903	17.7998	13.2705	30284	95	197	11	5.58376	1.63589	667|1832|3852|3854|3855|3858|3861|3872|3875|3880|7431	DST|DSP|KRT5|KRT6B|KRT7|KRT10|KRT14|KRT17|KRT18|KRT19|VIM	-7.74187	0	7	0	0	-16.2229	21.1038
0	0	0	1	0	1	0	0	0	-5.82699	0	-8.58121	GO:0045103	M000101	2	0	GO Biological Processes	19	intermediate filament-based process	19_GO:0009987 cellular process	-10.4399	17.6144	13.1931	30284	96	197	11	5.58376	1.63589	667|1832|3852|3854|3855|3858|3861|3872|3875|3880|7431	DST|DSP|KRT5|KRT6B|KRT7|KRT10|KRT14|KRT17|KRT18|KRT19|VIM	-7.70406	0	7	0	0	-16.2229	21.1038
0	0	0	1	0	1	0	0	0	-4.78868	0	-7.66243	GO:0045109	M000101	2	0	GO Biological Processes	19	intermediate filament organization	19_GO:0009987 cellular process	-8.82226	18.4471	12.2413	30284	75	197	9	4.56853	1.48765	1832|3852|3854|3855|3858|3861|3872|3880|7431	DSP|KRT5|KRT6B|KRT7|KRT10|KRT14|KRT17|KRT19|VIM	-6.4116	0	7	0	0	-16.2229	21.1038
0	0	0	1	0	1	0	0	0	-6.65453	0	-3.89177	R-HSA-6805567	M000101	2	0	Reactome Gene Sets	6	Keratinization		-7.82741	8.78434	9.15965	30284	210	197	12	6.09137	1.70403	1824|1832|3728|3852|3854|3855|3856|3858|3861|3872|3875|3880	DSC2|DSP|JUP|KRT5|KRT6B|KRT7|KRT8|KRT10|KRT14|KRT17|KRT18|KRT19	-5.64443	0	7	0	0	-16.2229	21.1038
0	0	1	1	0	1	0	0	-3.0517	-2.5523	0	-3.5113	hsa04915	M001101	3	0	KEGG Pathway	24	Estrogen signaling pathway		-6.46403	9.95347	8.5612	30284	139	197	9	4.56853	1.48765	1956|3858|3861|3872|3875|3880|4313|5290|5914	EGFR|KRT10|KRT14|KRT17|KRT18|KRT19|MMP2|PIK3CA|RARA	-4.51859	0	7	0	0	-16.2229	21.1038
0	0	0	1	0	1	0	0	0	-2.93609	0	-5.39859	hsa05150	M000101	2	0	KEGG Pathway	24	Staphylococcus aureus infection		-6.44178	12.0569	9.05115	30284	102	197	8	4.06091	1.4063	712|714|2214|3858|3861|3872|3875|3880	C1QA|C1QC|FCGR3A|KRT10|KRT14|KRT17|KRT18|KRT19	-4.50034	0	7	0	0	-16.2229	21.1038
0	0	0	0	0	1	0	0	0	0	0	-4.39845	GO:0031424	M000001	1	0	GO Biological Processes	19	keratinization	19_GO:0032502 developmental process	-4.39845	21.1038	8.7743	30284	82	70	4	5.71429	2.77431	1001|3852|3854|3872	CDH3|KRT5|KRT6B|KRT17	-2.94592	0	7	0	0	-16.2229	21.1038
0	0	0	0	0	1	0	0	0	0	0	-2.83898	GO:0002690	M000001	1	0	GO Biological Processes	19	positive regulation of leukocyte chemotaxis	19_GO:0040011 locomotion	-4.39763	9.60787	6.83529	30284	96	197	6	3.04569	1.22431	199|1524|5764|6387|7422|57402	AIF1|CX3CR1|PTN|CXCL12|VEGFA|S100A14	-2.80347	0	8	0	0	-15.4254	9.60787
0	0	1	0	0	1	0	0	-2.4873	0	0	-3.19339	GO:0051960	M001001	2	0	GO Biological Processes	19	regulation of nervous system development	19_GO:0032502 developmental process	-4.33188	4.06324	5.32139	30284	454	197	12	6.09137	1.70403	999|1524|1956|3687|4311|5728|5764|5914|6387|7070|7422|7852	CDH1|CX3CR1|EGFR|ITGAX|MME|PTEN|PTN|RARA|CXCL12|THY1|VEGFA|CXCR4	-2.75182	0	8	0	0	-15.4254	9.60787
0	0	0	0	0	1	0	0	0	0	0	-3.4303	GO:0050921	M000001	1	0	GO Biological Processes	19	positive regulation of chemotaxis	19_GO:0040011 locomotion	-4.30006	7.37042	6.24353	30284	146	197	7	3.5533	1.31894	199|1524|5764|6387|7422|7852|57402	AIF1|CX3CR1|PTN|CXCL12|VEGFA|CXCR4|S100A14	-2.7263	0	8	0	0	-15.4254	9.60787
0	0	0	0	0	1	0	0	0	0	0	-3.82531	GO:0050920	M000001	1	0	GO Biological Processes	19	regulation of chemotaxis	19_GO:0040011 locomotion	-4.02932	5.66731	5.58335	30284	217	197	8	4.06091	1.4063	199|1524|1880|5764|6387|7422|7852|57402	AIF1|CX3CR1|GPR183|PTN|CXCL12|VEGFA|CXCR4|S100A14	-2.50546	0	8	0	0	-15.4254	9.60787
0	0	0	0	0	1	0	0	0	0	0	-2.76606	GO:0050767	M000001	1	0	GO Biological Processes	19	regulation of neurogenesis	19_GO:0032502 developmental process	-3.75669	4.13242	4.91894	30284	372	197	10	5.07614	1.56394	999|1524|1956|4311|5728|5764|6387|7070|7422|7852	CDH1|CX3CR1|EGFR|MME|PTEN|PTN|CXCL12|THY1|VEGFA|CXCR4	-2.25927	0	8	0	0	-15.4254	9.60787
0	0	0	0	0	1	0	0	0	0	0	-2.49317	GO:0002688	M000001	1	0	GO Biological Processes	19	regulation of leukocyte chemotaxis	19_GO:0040011 locomotion	-3.72358	7.26264	5.7228	30284	127	197	6	3.04569	1.22431	199|1524|5764|6387|7422|57402	AIF1|CX3CR1|PTN|CXCL12|VEGFA|S100A14	-2.23256	0	8	0	0	-15.4254	9.60787
0	0	0	0	0	1	0	0	0	0	0	-6.17688	GO:0019221	M000001	1	0	GO Biological Processes	19	cytokine-mediated signaling pathway	19_GO:0050896 response to stimulus	-6.7661	5.35009	7.36014	30284	431	197	15	7.61421	1.88965	857|920|960|1524|1956|2064|2207|2264|2296|3561|3856|3875|6387|7852|92610	CAV1|CD4|CD44|CX3CR1|EGFR|ERBB2|FCER1G|FGFR4|FOXC1|IL2RG|KRT8|KRT18|CXCL12|CXCR4|TIFA	-4.75433	0	9	0	0	-15.0324	6.05528
0	0	1	1	0	1	0	0	-3.92675	-8.21089	0	-4.66987	GO:0043627	M001101	3	0	GO Biological Processes	19	response to estrogen	19_GO:0050896 response to stimulus	-13.504	26.353	17.1837	30284	70	197	12	6.09137	1.70403	367|857|2625|3880|4193|4311|4313|5272|5914|6422|8085|100133941	AR|CAV1|GATA3|KRT19|MDM2|MME|MMP2|SERPINB9|RARA|SFRP1|KMT2D|CD24	-10.4282	0	10	0	0	-14.8714	61.8041
0	0	1	1	0	1	0	0	-4.23305	-2.45933	0	-3.12916	GO:0001822	M001101	3	0	GO Biological Processes	19	kidney development	19_GO:0032502 developmental process	-9.65074	7.98576	9.97115	30284	308	197	16	8.12183	1.94626	59|1063|2296|2625|4070|4072|4311|5175|5914|6385|6422|6659|7020|7422|10409|100133941	ACTA2|CENPF|FOXC1|GATA3|TACSTD2|EPCAM|MME|PECAM1|RARA|SDC4|SFRP1|SOX4|TFAP2A|VEGFA|BASP1|CD24	-7.12672	0	10	0	0	-14.8714	61.8041
0	0	0	1	0	1	0	0	0	-2.51754	0	-3.46449	GO:0072073	M000101	2	0	GO Biological Processes	19	kidney epithelium development	19_GO:0032502 developmental process	-7.43872	10.7501	9.4567	30284	143	197	10	5.07614	1.56394	2296|2625|4070|4072|5175|5914|6385|6422|10409|100133941	FOXC1|GATA3|TACSTD2|EPCAM|PECAM1|RARA|SDC4|SFRP1|BASP1|CD24	-5.30184	0	10	0	0	-14.8714	61.8041
0	0	0	1	0	1	0	0	0	-3.48802	0	-3.31198	GO:1905330	M000101	2	0	GO Biological Processes	19	regulation of morphogenesis of an epithelium	19_GO:0032502 developmental process	-6.60316	16.3043	10.0715	30284	66	197	7	3.5533	1.31894	367|2625|3687|4070|6422|6591|7422	AR|GATA3|ITGAX|TACSTD2|SFRP1|SNAI2|VEGFA	-4.62862	0	10	0	0	-14.8714	61.8041
0	0	0	1	0	0	0	0	0	-3.12183	0	0	GO:0001657	M000100	1	0	GO Biological Processes	19	ureteric bud development	19_GO:0032502 developmental process	-5.7443	12.2282	8.53532	30284	88	197	7	3.5533	1.31894	2296|2625|4070|4072|5914|6385|6422	FOXC1|GATA3|TACSTD2|EPCAM|RARA|SDC4|SFRP1	-3.91795	0	10	0	0	-14.8714	61.8041
0	0	0	1	0	0	0	0	0	-3.10755	0	0	GO:0072163	M000100	1	0	GO Biological Processes	19	mesonephric epithelium development	19_GO:0032502 developmental process	-5.7111	12.0908	8.47878	30284	89	197	7	3.5533	1.31894	2296|2625|4070|4072|5914|6385|6422	FOXC1|GATA3|TACSTD2|EPCAM|RARA|SDC4|SFRP1	-3.89361	0	10	0	0	-14.8714	61.8041
0	0	0	1	0	0	0	0	0	-3.10755	0	0	GO:0072164	M000100	1	0	GO Biological Processes	19	mesonephric tubule development	19_GO:0032502 developmental process	-5.7111	12.0908	8.47878	30284	89	197	7	3.5533	1.31894	2296|2625|4070|4072|5914|6385|6422	FOXC1|GATA3|TACSTD2|EPCAM|RARA|SDC4|SFRP1	-3.89361	0	10	0	0	-14.8714	61.8041
0	0	0	1	0	0	0	0	0	-3.05212	0	0	GO:0001823	M000100	1	0	GO Biological Processes	19	mesonephros development	19_GO:0032502 developmental process	-5.58234	11.5708	8.26137	30284	93	197	7	3.5533	1.31894	2296|2625|4070|4072|5914|6385|6422	FOXC1|GATA3|TACSTD2|EPCAM|RARA|SDC4|SFRP1	-3.78964	0	10	0	0	-14.8714	61.8041
0	0	1	0	0	1	0	0	-3.56531	0	0	-3.69045	GO:0008406	M001001	2	0	GO Biological Processes	19	gonad development	19_GO:0022414 reproductive process	-5.49967	6.62612	6.9608	30284	232	197	10	5.07614	1.56394	367|2296|2316|2625|4313|5914|6422|7422|8644|10409	AR|FOXC1|FLNA|GATA3|MMP2|RARA|SFRP1|VEGFA|AKR1C3|BASP1	-3.72493	0	10	0	0	-14.8714	61.8041
0	0	1	0	0	1	0	0	-3.20555	0	0	-4.24925	GO:0007548	M001001	2	0	GO Biological Processes	19	sex differentiation	19_GO:0022414 reproductive process	-5.47256	5.85116	6.70522	30284	289	197	11	5.58376	1.63589	367|2296|2316|2625|4313|5914|6422|7422|8626|8644|10409	AR|FOXC1|FLNA|GATA3|MMP2|RARA|SFRP1|VEGFA|TP63|AKR1C3|BASP1	-3.70321	0	10	0	0	-14.8714	61.8041
0	0	1	0	0	1	0	0	-3.53014	0	0	-3.64762	GO:0045137	M001001	2	0	GO Biological Processes	19	development of primary sexual characteristics	19_GO:0022414 reproductive process	-5.41741	6.48632	6.86117	30284	237	197	10	5.07614	1.56394	367|2296|2316|2625|4313|5914|6422|7422|8644|10409	AR|FOXC1|FLNA|GATA3|MMP2|RARA|SFRP1|VEGFA|AKR1C3|BASP1	-3.66643	0	10	0	0	-14.8714	61.8041
0	0	0	1	0	0	0	0	0	-2.51754	0	0	GO:0016331	M000100	1	0	GO Biological Processes	19	morphogenesis of embryonic epithelium	19_GO:0032502 developmental process	-5.33079	8.60005	7.37138	30284	143	197	8	4.06091	1.4063	220|2625|5914|6385|6422|7020|8626|9968	ALDH1A3|GATA3|RARA|SDC4|SFRP1|TFAP2A|TP63|MED12	-3.59122	0	10	0	0	-14.8714	61.8041
0	0	1	0	0	0	0	0	-3.82055	0	0	0	GO:1902893	M001000	1	0	GO Biological Processes	19	regulation of miRNA transcription	19_GO:0050789 regulation of biological process	-4.97828	12.1363	7.86553	30284	76	197	6	3.04569	1.22431	367|1956|2625|5468|5914|7422	AR|EGFR|GATA3|PPARG|RARA|VEGFA	-3.30153	0	10	0	0	-14.8714	61.8041
0	0	0	0	0	1	0	0	0	0	0	-3.77683	GO:0030850	M000001	1	0	GO Biological Processes	19	prostate gland development	19_GO:0022414 reproductive process	-4.91295	16.7093	8.62786	30284	46	197	5	2.53807	1.12056	367|4313|5914|6422|8626	AR|MMP2|RARA|SFRP1|TP63	-3.24478	0	10	0	0	-14.8714	61.8041
0	0	0	0	0	1	0	0	0	0	0	-4.69334	GO:0060740	M000001	1	0	GO Biological Processes	19	prostate gland epithelium morphogenesis	19_GO:0022414 reproductive process	-4.85513	26.7349	9.99053	30284	23	197	4	2.03046	1.00487	367|4313|6422|8626	AR|MMP2|SFRP1|TP63	-3.18908	0	10	0	0	-14.8714	61.8041
0	0	0	0	0	1	0	0	0	0	0	-4.81626	GO:2000269	M000001	1	0	GO Biological Processes	19	regulation of fibroblast apoptotic process	19_GO:0050789 regulation of biological process	-4.81626	61.8041	13.4162	30284	21	70	3	4.28571	2.42076	5290|6422|8626	PIK3CA|SFRP1|TP63	-3.30278	0	10	0	0	-14.8714	61.8041
0	0	0	1	0	0	0	0	0	-3.19585	0	0	GO:2000027	M000100	1	0	GO Biological Processes	19	regulation of animal organ morphogenesis	19_GO:0032502 developmental process	-4.75749	11.1127	7.46516	30284	83	197	6	3.04569	1.22431	367|2625|4070|6422|6591|7422	AR|GATA3|TACSTD2|SFRP1|SNAI2|VEGFA	-3.11005	0	10	0	0	-14.8714	61.8041
0	0	0	0	0	1	0	0	0	0	0	-4.58127	GO:0060512	M000001	1	0	GO Biological Processes	19	prostate gland morphogenesis	19_GO:0022414 reproductive process	-4.70465	24.5961	9.55052	30284	25	197	4	2.03046	1.00487	367|4313|6422|8626	AR|MMP2|SFRP1|TP63	-3.06623	0	10	0	0	-14.8714	61.8041
0	0	1	0	0	0	0	0	-3.5751	0	0	0	GO:2000628	M001000	1	0	GO Biological Processes	19	regulation of miRNA metabolic process	19_GO:0050789 regulation of biological process	-4.50225	10.0256	7.01564	30284	92	197	6	3.04569	1.22431	367|1956|2625|5468|5914|7422	AR|EGFR|GATA3|PPARG|RARA|VEGFA	-2.89064	0	10	0	0	-14.8714	61.8041
0	0	0	1	0	0	0	0	0	-2.41974	0	0	GO:0060562	M000100	1	0	GO Biological Processes	19	epithelial tube morphogenesis	19_GO:0032502 developmental process	-4.33892	4.86474	5.58828	30284	316	197	10	5.07614	1.56394	367|1282|2625|4070|5914|6385|6422|7422|7852|9968	AR|COL4A1|GATA3|TACSTD2|RARA|SDC4|SFRP1|VEGFA|CXCR4|MED12	-2.75722	0	10	0	0	-14.8714	61.8041
0	0	0	0	0	1	0	0	0	0	0	-3.3714	GO:0001655	M000001	1	0	GO Biological Processes	19	urogenital system development	19_GO:0032502 developmental process	-4.2419	12.2005	7.20104	30284	63	197	5	2.53807	1.12056	367|4313|5914|6422|8626	AR|MMP2|RARA|SFRP1|TP63	-2.68133	0	10	0	0	-14.8714	61.8041
0	0	0	0	0	1	0	0	0	0	0	-3.97916	GO:0022612	M000001	1	0	GO Biological Processes	19	gland morphogenesis	19_GO:0032502 developmental process	-4.17909	8.78434	6.46557	30284	105	197	6	3.04569	1.22431	367|857|1956|4313|6422|8626	AR|CAV1|EGFR|MMP2|SFRP1|TP63	-2.62998	0	10	0	0	-14.8714	61.8041
0	0	0	0	0	1	0	0	0	0	0	-3.12514	GO:0050680	M000001	1	0	GO Biological Processes	19	negative regulation of epithelial cell proliferation	19_GO:0048519 negative regulation of biological process	-3.792	6.1141	5.50589	30284	176	197	7	3.5533	1.31894	367|857|2625|5468|6422|6591|6678	AR|CAV1|GATA3|PPARG|SFRP1|SNAI2|SPARC	-2.2917	0	10	0	0	-14.8714	61.8041
0	0	0	1	0	0	0	0	0	-2.47554	0	0	GO:0008584	M000100	1	0	GO Biological Processes	19	male gonad development	19_GO:0022414 reproductive process	-3.36619	6.23213	5.16309	30284	148	197	6	3.04569	1.22431	367|2316|2625|5914|6422|8644	AR|FLNA|GATA3|RARA|SFRP1|AKR1C3	-1.92578	0	10	0	0	-14.8714	61.8041
0	0	0	1	0	0	0	0	0	-2.46733	0	0	GO:0046546	M000100	1	0	GO Biological Processes	19	development of primary male sexual characteristics	19_GO:0022414 reproductive process	-3.35067	6.1903	5.13918	30284	149	197	6	3.04569	1.22431	367|2316|2625|5914|6422|8644	AR|FLNA|GATA3|RARA|SFRP1|AKR1C3	-1.914	0	10	0	0	-14.8714	61.8041
0	0	1	0	0	1	0	0	-2.07045	0	0	-2.58824	GO:0048598	M001001	2	0	GO Biological Processes	19	embryonic morphogenesis	19_GO:0032502 developmental process	-3.23873	3.08997	4.17337	30284	597	197	12	6.09137	1.70403	220|1291|2296|2625|4313|5914|6385|6422|6678|7020|8626|9968	ALDH1A3|COL6A1|FOXC1|GATA3|MMP2|RARA|SDC4|SFRP1|SPARC|TFAP2A|TP63|MED12	-1.82157	0	10	0	0	-14.8714	61.8041
0	0	0	1	0	0	0	0	0	-2.29332	0	0	GO:0046661	M000100	1	0	GO Biological Processes	19	male sex differentiation	19_GO:0022414 reproductive process	-3.02399	5.36253	4.64276	30284	172	197	6	3.04569	1.22431	367|2316|2625|5914|6422|8644	AR|FLNA|GATA3|RARA|SFRP1|AKR1C3	-1.63619	0	10	0	0	-14.8714	61.8041
0	0	0	0	0	1	0	0	0	0	0	-2.15532	GO:0061138	M000001	1	0	GO Biological Processes	19	morphogenesis of a branching epithelium	19_GO:0032502 developmental process	-2.30551	4.57518	3.76007	30284	168	197	5	2.53807	1.12056	367|1282|6422|7422|8626	AR|COL4A1|SFRP1|VEGFA|TP63	-1.01105	0	10	0	0	-14.8714	61.8041
0	0	0	0	0	1	0	0	0	0	0	-2.08002	GO:0001763	M000001	1	0	GO Biological Processes	19	morphogenesis of a branching structure	19_GO:0032502 developmental process	-2.19089	4.29402	3.57665	30284	179	197	5	2.53807	1.12056	367|1282|6422|7422|8626	AR|COL4A1|SFRP1|VEGFA|TP63	-0.905317	0	10	0	0	-14.8714	61.8041
0	0	0	0	0	1	0	0	0	0	0	-10.8731	GO:0051249	M000001	1	0	GO Biological Processes	19	regulation of lymphocyte activation	19_GO:0002376 immune system process	-11.3177	6.4913	10.2306	30284	521	197	22	11.1675	2.24404	199|857|920|942|1880|2064|2214|2625|3561|4332|5290|5788|5914|6385|6422|6659|7037|7070|10875|57162|84868|100133941	AIF1|CAV1|CD4|CD86|GPR183|ERBB2|FCGR3A|GATA3|IL2RG|MNDA|PIK3CA|PTPRC|RARA|SDC4|SFRP1|SOX4|TFRC|THY1|FGL2|PELI1|HAVCR2|CD24	-8.43577	0	11	0	0	-14.493	14.3474
0	0	0	0	0	1	0	0	0	0	0	-10.1314	GO:0002694	M000001	1	0	GO Biological Processes	19	regulation of leukocyte activation	19_GO:0002376 immune system process	-10.2322	5.70315	9.35938	30284	593	197	22	11.1675	2.24404	199|857|920|942|1880|2064|2214|2625|3561|4332|5290|5788|5914|6385|6422|6659|7037|7070|10875|57162|84868|100133941	AIF1|CAV1|CD4|CD86|GPR183|ERBB2|FCGR3A|GATA3|IL2RG|MNDA|PIK3CA|PTPRC|RARA|SDC4|SFRP1|SOX4|TFRC|THY1|FGL2|PELI1|HAVCR2|CD24	-7.56754	0	11	0	0	-14.493	14.3474
0	0	0	0	0	1	0	0	0	0	0	-7.5993	GO:0050863	M000001	1	0	GO Biological Processes	19	regulation of T cell activation	19_GO:0002376 immune system process	-9.86782	7.00523	9.72111	30284	395	197	18	9.13706	2.05288	199|857|920|942|2064|2625|3561|5290|5788|5914|6385|6659|7037|7070|10875|57162|84868|100133941	AIF1|CAV1|CD4|CD86|ERBB2|GATA3|IL2RG|PIK3CA|PTPRC|RARA|SDC4|SOX4|TFRC|THY1|FGL2|PELI1|HAVCR2|CD24	-7.26917	0	11	0	0	-14.493	14.3474
0	0	0	0	0	1	0	0	0	0	0	-9.02741	GO:0002696	M000001	1	0	GO Biological Processes	19	positive regulation of leukocyte activation	19_GO:0002376 immune system process	-9.36463	7.02511	9.46143	30284	372	197	17	8.62944	2.00061	199|857|920|942|1880|2214|2625|3561|5290|5788|5914|6659|7037|7070|57162|84868|100133941	AIF1|CAV1|CD4|CD86|GPR183|FCGR3A|GATA3|IL2RG|PIK3CA|PTPRC|RARA|SOX4|TFRC|THY1|PELI1|HAVCR2|CD24	-6.88408	0	11	0	0	-14.493	14.3474
0	0	0	0	0	1	0	0	0	0	0	-6.95828	GO:0032944	M000001	1	0	GO Biological Processes	19	regulation of mononuclear cell proliferation	19_GO:0050789 regulation of biological process	-7.98533	8.05821	9.03114	30284	248	197	13	6.59898	1.76881	199|942|1265|1880|2064|2214|4332|5788|6385|7037|57162|84868|100133941	AIF1|CD86|CNN2|GPR183|ERBB2|FCGR3A|MNDA|PTPRC|SDC4|TFRC|PELI1|HAVCR2|CD24	-5.75851	0	11	0	0	-14.493	14.3474
0	0	0	0	0	1	0	0	0	0	0	-6.63983	GO:0070663	M000001	1	0	GO Biological Processes	19	regulation of leukocyte proliferation	19_GO:0050789 regulation of biological process	-7.4916	7.32028	8.4883	30284	273	197	13	6.59898	1.76881	199|942|1265|1880|2064|2214|4332|5788|6385|7037|57162|84868|100133941	AIF1|CD86|CNN2|GPR183|ERBB2|FCGR3A|MNDA|PTPRC|SDC4|TFRC|PELI1|HAVCR2|CD24	-5.34842	0	11	0	0	-14.493	14.3474
0	0	0	0	0	1	0	0	0	0	0	-5.81485	GO:0050670	M000001	1	0	GO Biological Processes	19	regulation of lymphocyte proliferation	19_GO:0002376 immune system process	-7.12854	7.5914	8.3477	30284	243	197	12	6.09137	1.70403	199|942|1880|2064|2214|4332|5788|6385|7037|57162|84868|100133941	AIF1|CD86|GPR183|ERBB2|FCGR3A|MNDA|PTPRC|SDC4|TFRC|PELI1|HAVCR2|CD24	-5.058	0	11	0	0	-14.493	14.3474
0	0	0	0	0	1	0	0	0	0	0	-5.92135	GO:0050671	M000001	1	0	GO Biological Processes	19	positive regulation of lymphocyte proliferation	19_GO:0002376 immune system process	-6.25833	9.41179	8.27256	30284	147	197	9	4.56853	1.48765	199|942|1880|2214|5788|7037|57162|84868|100133941	AIF1|CD86|GPR183|FCGR3A|PTPRC|TFRC|PELI1|HAVCR2|CD24	-4.33952	0	11	0	0	-14.493	14.3474
0	0	0	0	0	1	0	0	0	0	0	-5.87016	GO:0032946	M000001	1	0	GO Biological Processes	19	positive regulation of mononuclear cell proliferation	19_GO:0048518 positive regulation of biological process	-6.18442	9.22355	8.16996	30284	150	197	9	4.56853	1.48765	199|942|1880|2214|5788|7037|57162|84868|100133941	AIF1|CD86|GPR183|FCGR3A|PTPRC|TFRC|PELI1|HAVCR2|CD24	-4.27001	0	11	0	0	-14.493	14.3474
0	0	0	0	0	1	0	0	0	0	0	-5.58424	GO:0070665	M000001	1	0	GO Biological Processes	19	positive regulation of leukocyte proliferation	19_GO:0048518 positive regulation of biological process	-5.77348	8.23532	7.60951	30284	168	197	9	4.56853	1.48765	199|942|1880|2214|5788|7037|57162|84868|100133941	AIF1|CD86|GPR183|FCGR3A|PTPRC|TFRC|PELI1|HAVCR2|CD24	-3.93606	0	11	0	0	-14.493	14.3474
0	0	0	0	0	1	0	0	0	0	0	-4.83604	GO:0050866	M000001	1	0	GO Biological Processes	19	negative regulation of cell activation	19_GO:0048519 negative regulation of biological process	-5.58403	6.77207	7.06341	30284	227	197	10	5.07614	1.56394	928|942|2064|4332|5788|6385|6422|10875|57162|84868	CD9|CD86|ERBB2|MNDA|PTPRC|SDC4|SFRP1|FGL2|PELI1|HAVCR2	-3.78964	0	11	0	0	-14.493	14.3474
0	0	0	0	0	1	0	0	0	0	0	-3.05328	GO:0042129	M000001	1	0	GO Biological Processes	19	regulation of T cell proliferation	19_GO:0002376 immune system process	-5.44828	7.5192	7.17733	30284	184	197	9	4.56853	1.48765	199|942|2064|5788|6385|7037|57162|84868|100133941	AIF1|CD86|ERBB2|PTPRC|SDC4|TFRC|PELI1|HAVCR2|CD24	-3.69083	0	11	0	0	-14.493	14.3474
0	0	0	0	0	1	0	0	0	0	0	-5.09963	GO:0002695	M000001	1	0	GO Biological Processes	19	negative regulation of leukocyte activation	19_GO:0002376 immune system process	-5.09963	12.7244	8.08742	30284	204	70	6	8.57143	3.34594	942|4332|5788|6422|10875|84868	CD86|MNDA|PTPRC|SFRP1|FGL2|HAVCR2	-3.53323	0	11	0	0	-14.493	14.3474
0	0	0	0	0	1	0	0	0	0	0	-4.2885	GO:0051250	M000001	1	0	GO Biological Processes	19	negative regulation of lymphocyte activation	19_GO:0002376 immune system process	-4.72587	7.10871	6.52008	30284	173	197	8	4.06091	1.4063	942|2064|4332|6385|6422|10875|57162|84868	CD86|ERBB2|MNDA|SDC4|SFRP1|FGL2|PELI1|HAVCR2	-3.08447	0	11	0	0	-14.493	14.3474
0	0	0	0	0	1	0	0	0	0	0	-2.90585	GO:0050672	M000001	1	0	GO Biological Processes	19	negative regulation of lymphocyte proliferation	19_GO:0002376 immune system process	-4.52921	10.1358	7.06246	30284	91	197	6	3.04569	1.22431	942|2064|4332|6385|57162|84868	CD86|ERBB2|MNDA|SDC4|PELI1|HAVCR2	-2.91382	0	11	0	0	-14.493	14.3474
0	0	0	0	0	1	0	0	0	0	0	-2.87865	GO:0032945	M000001	1	0	GO Biological Processes	19	negative regulation of mononuclear cell proliferation	19_GO:0048519 negative regulation of biological process	-4.47563	9.9178	6.96953	30284	93	197	6	3.04569	1.22431	942|2064|4332|6385|57162|84868	CD86|ERBB2|MNDA|SDC4|PELI1|HAVCR2	-2.87059	0	11	0	0	-14.493	14.3474
0	0	0	0	0	1	0	0	0	0	0	-2.78811	GO:0070664	M000001	1	0	GO Biological Processes	19	negative regulation of leukocyte proliferation	19_GO:0048519 negative regulation of biological process	-4.29777	9.22355	6.66522	30284	100	197	6	3.04569	1.22431	942|2064|4332|6385|57162|84868	CD86|ERBB2|MNDA|SDC4|PELI1|HAVCR2	-2.7263	0	11	0	0	-14.493	14.3474
0	0	0	0	0	1	0	0	0	0	0	-3.97916	GO:0042102	M000001	1	0	GO Biological Processes	19	positive regulation of T cell proliferation	19_GO:0002376 immune system process	-4.17909	8.78434	6.46557	30284	105	197	6	3.04569	1.22431	199|942|5788|7037|84868|100133941	AIF1|CD86|PTPRC|TFRC|HAVCR2|CD24	-2.62998	0	11	0	0	-14.493	14.3474
0	0	0	0	0	1	0	0	0	0	0	-2.25166	GO:1903038	M000001	1	0	GO Biological Processes	19	negative regulation of leukocyte cell-cell adhesion	19_GO:0048519 negative regulation of biological process	-4.13579	6.94246	6.00182	30284	155	197	7	3.5533	1.31894	942|2064|6385|6387|10875|57162|84868	CD86|ERBB2|SDC4|CXCL12|FGL2|PELI1|HAVCR2	-2.59229	0	11	0	0	-14.493	14.3474
0	0	0	0	0	1	0	0	0	0	0	-3.27392	GO:0030888	M000001	1	0	GO Biological Processes	19	regulation of B cell proliferation	19_GO:0002376 immune system process	-4.08216	11.3034	6.8827	30284	68	197	5	2.53807	1.12056	1880|4332|5788|7037|57162	GPR183|MNDA|PTPRC|TFRC|PELI1	-2.55122	0	11	0	0	-14.493	14.3474
0	0	0	0	0	1	0	0	0	0	0	-2.97675	GO:0050871	M000001	1	0	GO Biological Processes	19	positive regulation of B cell activation	19_GO:0002376 immune system process	-3.59932	8.93755	5.96472	30284	86	197	5	2.53807	1.12056	1880|3561|5788|7037|57162	GPR183|IL2RG|PTPRC|TFRC|PELI1	-2.12966	0	11	0	0	-14.493	14.3474
0	0	0	0	0	1	0	0	0	0	0	-2.4097	GO:0050868	M000001	1	0	GO Biological Processes	19	negative regulation of T cell activation	19_GO:0002376 immune system process	-3.56262	6.78202	5.46844	30284	136	197	6	3.04569	1.22431	942|2064|6385|10875|57162|84868	CD86|ERBB2|SDC4|FGL2|PELI1|HAVCR2	-2.09897	0	11	0	0	-14.493	14.3474
0	0	0	1	0	1	0	0	0	-8.16355	0	-2.9193	M5906	M000101	2	0	Hallmark Gene Sets	23	HALLMARK ESTROGEN RESPONSE EARLY		-12.4812	12.2981	12.9716	30284	200	197	16	8.12183	1.94626	360|367|595|960|2194|2296|2317|3856|3875|3880|4582|5914|6387|6840|7033|25800	AQP3|AR|CCND1|CD44|FASN|FOXC1|FLNB|KRT8|KRT18|KRT19|MUC1|RARA|CXCL12|SVIL|TFF3|SLC39A6	-9.48004	0	12	1	1	-12.4812	12.2981
0	0	0	1	1	1	0	0	0	-5.5005	-2.83561	-2.9193	M5907	M000111	3	0	Hallmark Gene Sets	23	HALLMARK ESTROGEN RESPONSE LATE		-10.204	10.7608	11.2067	30284	200	197	14	7.1066	1.83059	595|857|928|960|990|991|999|2296|2317|3880|6387|7033|7153|57758	CCND1|CAV1|CD9|CD44|CDC6|CDC20|CDH1|FOXC1|FLNB|KRT19|CXCL12|TFF3|TOP2A|SCUBE2	-7.56754	0	12	0	0	-12.4812	12.2981
0	0	1	1	0	1	0	0	-5.30236	-6.09881	0	-3.75755	WP5434	M001101	3	0	WikiPathways	27	Cancer pathways		-12.4213	6.94636	10.9478	30284	509	197	23	11.6751	2.28791	332|367|595|999|1282|1613|1956|2064|2264|3561|3655|3728|4193|4313|5290|5468|5728|5914|6387|7422|7852|8030|9618	BIRC5|AR|CCND1|CDH1|COL4A1|DAPK3|EGFR|ERBB2|FGFR4|IL2RG|ITGA6|JUP|MDM2|MMP2|PIK3CA|PPARG|PTEN|RARA|CXCL12|VEGFA|CXCR4|CCDC6|TRAF4	-9.44243	0	13	1	1	-12.4213	30.7452
0	0	1	1	0	1	0	0	-5.1718	-5.93356	0	-3.63564	hsa05200	M001101	3	0	KEGG Pathway	24	Pathways in cancer		-12.0093	6.63357	10.6179	30284	533	197	23	11.6751	2.28791	332|367|595|999|1282|1613|1956|2064|2264|3561|3655|3728|4193|4313|5290|5468|5728|5914|6387|7422|7852|8030|9618	BIRC5|AR|CCND1|CDH1|COL4A1|DAPK3|EGFR|ERBB2|FGFR4|IL2RG|ITGA6|JUP|MDM2|MMP2|PIK3CA|PPARG|PTEN|RARA|CXCL12|VEGFA|CXCR4|CCDC6|TRAF4	-9.05159	0	13	0	0	-12.4213	30.7452
0	0	1	1	0	0	0	0	-4.65805	-5.88966	0	0	WP2828	M001100	2	0	WikiPathways	27	Bladder cancer		-9.74743	30.7452	15.2325	30284	40	197	8	4.06091	1.4063	595|999|1613|1956|2064|4193|4313|7422	CCND1|CDH1|DAPK3|EGFR|ERBB2|MDM2|MMP2|VEGFA	-7.19564	0	13	0	0	-12.4213	30.7452
0	0	1	1	0	0	0	0	-4.62546	-5.84573	0	0	hsa05219	M001100	2	0	KEGG Pathway	24	Bladder cancer		-9.65557	29.9953	15.0332	30284	41	197	8	4.06091	1.4063	595|999|1613|1956|2064|4193|4313|7422	CCND1|CDH1|DAPK3|EGFR|ERBB2|MDM2|MMP2|VEGFA	-7.12672	0	13	0	0	-12.4213	30.7452
0	0	0	0	0	1	0	0	0	0	0	-5.44011	WP5300	M000001	1	0	WikiPathways	27	TROP2 regulatory signaling		-7.78765	23.9129	12.4465	30284	45	197	7	3.5533	1.31894	595|999|1956|4070|5175|5728|7431	CCND1|CDH1|EGFR|TACSTD2|PECAM1|PTEN|VIM	-5.60812	0	13	0	0	-12.4213	30.7452
0	0	1	0	0	1	0	0	-3.85495	0	0	-4.57427	WP4674	M001001	2	0	WikiPathways	27	Head and neck squamous cell carcinoma		-7.53722	16.619	10.8852	30284	74	197	8	4.06091	1.4063	595|1956|1978|2064|5290|5728|7422|8626	CCND1|EGFR|EIF4EBP1|ERBB2|PIK3CA|PTEN|VEGFA|TP63	-5.38766	0	13	0	0	-12.4213	30.7452
0	0	1	0	1	1	0	0	-3.34727	0	-3.59001	-2.66987	hsa04066	M001011	3	0	KEGG Pathway	24	HIF-1 signaling pathway		-7.33939	12.5776	9.8433	30284	110	197	9	4.56853	1.48765	1956|1978|2064|2597|3945|5290|7037|7076|7422	EGFR|EIF4EBP1|ERBB2|GAPDH|LDHB|PIK3CA|TFRC|TIMP1|VEGFA	-5.22086	0	13	0	0	-12.4213	30.7452
0	0	0	0	0	1	0	0	0	0	0	-2.61501	WP4659	M000001	1	0	WikiPathways	27	Gastrin signaling		-7.17126	12.0307	9.58993	30284	115	197	9	4.56853	1.48765	332|595|960|999|1956|1978|5290|5468|7422	BIRC5|CCND1|CD44|CDH1|EGFR|EIF4EBP1|PIK3CA|PPARG|VEGFA	-5.09276	0	13	0	0	-12.4213	30.7452
0	0	1	1	0	1	0	0	-5.02119	-2.98626	0	-2.81327	WP5475	M001101	3	0	WikiPathways	27	Hallmark of cancer sustaining proliferative signaling		-6.57627	12.5491	9.26616	30284	98	197	8	4.06091	1.4063	595|1956|2264|3728|4193|5290|5728|5914	CCND1|EGFR|FGFR4|JUP|MDM2|PIK3CA|PTEN|RARA	-4.6041	0	13	0	0	-12.4213	30.7452
0	0	1	0	0	1	0	0	-3.08158	0	0	-5.10116	hsa05206	M001001	2	0	KEGG Pathway	24	MicroRNAs in cancer		-5.96833	5.91253	7.05778	30284	312	197	12	6.09137	1.70403	595|960|1956|2064|4193|5290|5728|6659|7422|7431|8626|9839	CCND1|CD44|EGFR|ERBB2|MDM2|PIK3CA|PTEN|SOX4|VEGFA|VIM|TP63|ZEB2	-4.08971	0	13	0	0	-12.4213	30.7452
0	0	1	0	0	1	0	0	-3.69174	0	0	-3.00634	WP4806	M001001	2	0	WikiPathways	27	EGFR tyrosine kinase inhibitor resistance		-5.88141	12.8105	8.77096	30284	84	197	7	3.5533	1.31894	595|1956|1978|2064|5290|5728|7422	CCND1|EGFR|EIF4EBP1|ERBB2|PIK3CA|PTEN|VEGFA	-4.01481	0	13	0	0	-12.4213	30.7452
0	0	1	0	0	1	0	0	-3.6467	0	0	-4.29752	WP138	M001001	2	0	WikiPathways	27	Androgen receptor signaling		-5.77792	12.3687	8.59278	30284	87	197	7	3.5533	1.31894	367|595|857|1956|2316|4193|5728	AR|CCND1|CAV1|EGFR|FLNA|MDM2|PTEN	-3.93693	0	13	0	0	-12.4213	30.7452
0	0	0	0	0	1	0	0	0	0	0	-3.45543	hsa05213	M000001	1	0	KEGG Pathway	24	Endometrial cancer		-5.62439	15.6331	9.10382	30284	59	197	6	3.04569	1.22431	595|999|1956|2064|5290|5728	CCND1|CDH1|EGFR|ERBB2|PIK3CA|PTEN	-3.82451	0	13	0	0	-12.4213	30.7452
0	0	0	0	0	1	0	0	0	0	0	-3.3714	WP4155	M000001	1	0	WikiPathways	27	Endometrial cancer		-5.45537	14.6406	8.76983	30284	63	197	6	3.04569	1.22431	595|999|1956|2064|5290|5728	CCND1|CDH1|EGFR|ERBB2|PIK3CA|PTEN	-3.69399	0	13	0	0	-12.4213	30.7452
0	0	0	1	0	1	0	0	0	-2.98626	0	-2.81327	hsa05215	M000101	2	0	KEGG Pathway	24	Prostate cancer		-5.42978	10.9804	8.0076	30284	98	197	7	3.5533	1.31894	367|595|1956|2064|4193|5290|5728	AR|CCND1|EGFR|ERBB2|MDM2|PIK3CA|PTEN	-3.67752	0	13	0	0	-12.4213	30.7452
0	0	0	1	0	0	0	0	0	-4.17081	0	0	M156	M000100	1	0	Canonical Pathways	11	PID ECADHERIN NASCENT AJ PATHWAY		-5.27364	19.7084	9.4599	30284	39	197	5	2.53807	1.12056	595|999|2017|3728|5290	CCND1|CDH1|CTTN|JUP|PIK3CA	-3.54397	0	13	0	0	-12.4213	30.7452
0	0	0	0	0	1	0	0	0	0	0	-3.27392	hsa05221	M000001	1	0	KEGG Pathway	24	Acute myeloid leukemia		-5.26002	13.564	8.39284	30284	68	197	6	3.04569	1.22431	595|929|1978|3728|5290|5914	CCND1|CD14|EIF4EBP1|JUP|PIK3CA|RARA	-3.5354	0	13	0	0	-12.4213	30.7452
0	0	0	0	0	1	0	0	0	0	0	-3.25533	WP5293	M000001	1	0	WikiPathways	27	Acute myeloid leukemia		-5.22285	13.3675	8.32218	30284	69	197	6	3.04569	1.22431	595|929|1978|3728|5290|5914	CCND1|CD14|EIF4EBP1|JUP|PIK3CA|RARA	-3.50762	0	13	0	0	-12.4213	30.7452
0	0	1	1	0	0	0	0	-2.9315	-2.43505	0	0	WP1984	M001100	2	0	WikiPathways	27	Integrated breast cancer pathway		-5.1142	8.03795	7.06201	30284	153	197	8	4.06091	1.4063	367|595|999|1956|4193|5728|6790|7422	AR|CCND1|CDH1|EGFR|MDM2|PTEN|AURKA|VEGFA	-3.41637	0	13	0	0	-12.4213	30.7452
0	0	0	0	0	1	0	0	0	0	0	-3.18372	hsa05218	M000001	1	0	KEGG Pathway	24	Melanoma		-5.07991	12.635	8.05357	30284	73	197	6	3.04569	1.22431	595|999|1956|4193|5290|5728	CCND1|CDH1|EGFR|MDM2|PIK3CA|PTEN	-3.38773	0	13	0	0	-12.4213	30.7452
0	0	1	0	0	0	0	0	-3.75447	0	0	0	hsa01521	M001000	1	0	KEGG Pathway	24	EGFR tyrosine kinase inhibitor resistance		-4.84949	11.5294	7.63064	30284	80	197	6	3.04569	1.22431	1956|1978|2064|5290|5728|7422	EGFR|EIF4EBP1|ERBB2|PIK3CA|PTEN|VEGFA	-3.18674	0	13	0	0	-12.4213	30.7452
0	0	0	0	0	1	0	0	0	0	0	-3.03669	WP2261	M000001	1	0	WikiPathways	27	Glioblastoma signaling		-4.78774	11.2482	7.51937	30284	82	197	6	3.04569	1.22431	595|1956|2064|4193|5290|5728	CCND1|EGFR|ERBB2|MDM2|PIK3CA|PTEN	-3.13418	0	13	0	0	-12.4213	30.7452
0	0	0	0	0	1	0	0	0	0	0	-3.64311	WP3286	M000001	1	0	WikiPathways	27	Copper homeostasis		-4.69046	15.0712	8.138	30284	51	197	5	2.53807	1.12056	595|4193|5290|5728|8754	CCND1|MDM2|PIK3CA|PTEN|ADAM9	-3.05598	0	13	0	0	-12.4213	30.7452
0	0	0	0	0	1	0	0	0	0	0	-4.18421	hsa05222	M000001	1	0	KEGG Pathway	24	Small cell lung cancer		-4.47563	9.9178	6.96953	30284	93	197	6	3.04569	1.22431	595|1282|3655|5290|5728|9618	CCND1|COL4A1|ITGA6|PIK3CA|PTEN|TRAF4	-2.87059	0	13	0	0	-12.4213	30.7452
0	0	0	0	0	1	0	0	0	0	0	-4.13043	WP4658	M000001	1	0	WikiPathways	27	Small cell lung cancer		-4.39763	9.60787	6.83529	30284	96	197	6	3.04569	1.22431	595|1282|3655|5290|5728|9618	CCND1|COL4A1|ITGA6|PIK3CA|PTEN|TRAF4	-2.80347	0	13	0	0	-12.4213	30.7452
0	0	0	0	0	1	0	0	0	0	0	-2.80062	hsa01522	M000001	1	0	KEGG Pathway	24	Endocrine resistance		-4.32231	9.31672	6.70683	30284	99	197	6	3.04569	1.22431	595|1956|2064|4193|4313|5290	CCND1|EGFR|ERBB2|MDM2|MMP2|PIK3CA	-2.74471	0	13	0	0	-12.4213	30.7452
0	0	0	0	0	1	0	0	0	0	0	-2.68117	WP2263	M000001	1	0	WikiPathways	27	Androgen receptor network in prostate cancer		-4.08864	8.46198	6.31519	30284	109	197	6	3.04569	1.22431	367|595|1978|4193|5290|5728	AR|CCND1|EIF4EBP1|MDM2|PIK3CA|PTEN	-2.55538	0	13	0	0	-12.4213	30.7452
0	0	0	0	0	1	0	0	0	0	0	-3.27392	WP4685	M000001	1	0	WikiPathways	27	Melanoma		-4.08216	11.3034	6.8827	30284	68	197	5	2.53807	1.12056	595|999|4193|5290|5728	CCND1|CDH1|MDM2|PIK3CA|PTEN	-2.55122	0	13	0	0	-12.4213	30.7452
0	0	0	0	1	0	0	0	0	0	-2.7459	0	hsa05207	M000010	1	0	KEGG Pathway	24	Chemical carcinogenesis - receptor activation		-4.05724	5.72003	5.62015	30284	215	197	8	4.06091	1.4063	332|367|595|990|1956|1978|5290|7422	BIRC5|AR|CCND1|CDC6|EGFR|EIF4EBP1|PIK3CA|VEGFA	-2.52939	0	13	0	0	-12.4213	30.7452
0	0	0	0	0	1	0	0	0	0	0	-3.21899	hsa05230	M000001	1	0	KEGG Pathway	24	Central carbon metabolism in cancer		-3.99243	10.8258	6.70721	30284	71	197	5	2.53807	1.12056	1956|2064|3945|5290|5728	EGFR|ERBB2|LDHB|PIK3CA|PTEN	-2.47237	0	13	0	0	-12.4213	30.7452
0	0	0	0	0	1	0	0	0	0	0	-3.13268	hsa05214	M000001	1	0	KEGG Pathway	24	Glioma		-3.85186	10.1135	6.43689	30284	76	197	5	2.53807	1.12056	595|1956|4193|5290|5728	CCND1|EGFR|MDM2|PIK3CA|PTEN	-2.34575	0	13	0	0	-12.4213	30.7452
0	0	0	0	0	1	0	0	0	0	0	-3.8054	M5193	M000001	1	0	Canonical Pathways	11	SIG CHEMOTAXIS		-3.8054	28.8419	8.99634	30284	45	70	3	4.28571	2.42076	4638|5290|5728	MYLK|PIK3CA|PTEN	-2.47196	0	13	0	0	-12.4213	30.7452
0	0	0	0	0	1	0	0	0	0	0	-3.11597	GO:0050673	M000001	1	0	GO Biological Processes	19	epithelial cell proliferation	19_GO:0009987 cellular process	-3.77684	6.07955	5.48431	30284	177	197	7	3.5533	1.31894	367|595|857|1956|7422|8626|9839	AR|CCND1|CAV1|EGFR|VEGFA|TP63|ZEB2	-2.27726	0	13	0	0	-12.4213	30.7452
0	0	0	0	0	1	0	0	0	0	0	-3.76115	hsa05166	M000001	1	0	KEGG Pathway	24	Human T-cell leukemia virus 1 infection		-3.76115	9.65689	6.25944	30284	224	70	5	7.14286	3.07818	595|920|3561|5290|5728	CCND1|CD4|IL2RG|PIK3CA|PTEN	-2.43453	0	13	0	0	-12.4213	30.7452
0	0	0	0	0	1	0	0	0	0	0	-3.66872	WP395	M000001	1	0	WikiPathways	27	IL4 signaling		-3.66872	25.9577	8.50132	30284	50	70	3	4.28571	2.42076	2316|3561|5290	FLNA|IL2RG|PIK3CA	-2.35964	0	13	0	0	-12.4213	30.7452
0	0	0	0	0	1	0	0	0	0	0	-3.61802	M231	M000001	1	0	Canonical Pathways	11	PID KIT PATHWAY		-3.61802	24.9593	8.32314	30284	52	70	3	4.28571	2.42076	5290|5728|6591	PIK3CA|PTEN|SNAI2	-2.31904	0	13	0	0	-12.4213	30.7452
0	0	0	0	0	1	0	0	0	0	0	-2.43684	hsa04068	M000001	1	0	KEGG Pathway	24	FoxO signaling pathway		-3.61488	6.935	5.55059	30284	133	197	6	3.04569	1.22431	595|891|1956|4193|5290|5728	CCND1|CCNB1|EGFR|MDM2|PIK3CA|PTEN	-2.1398	0	13	0	0	-12.4213	30.7452
0	0	0	1	0	0	0	0	0	-2.45917	0	0	hsa05226	M000100	1	0	KEGG Pathway	24	Gastric cancer		-3.33526	6.14904	5.11548	30284	150	197	6	3.04569	1.22431	595|999|1956|2064|3728|5290	CCND1|CDH1|EGFR|ERBB2|JUP|PIK3CA	-1.90046	0	13	0	0	-12.4213	30.7452
0	0	0	0	0	1	0	0	0	0	0	-2.25166	WP4262	M000001	1	0	WikiPathways	27	Breast cancer pathway		-3.25999	5.95068	5.00013	30284	155	197	6	3.04569	1.22431	595|1956|2064|5290|5728|6424	CCND1|EGFR|ERBB2|PIK3CA|PTEN|SFRP4	-1.83501	0	13	0	0	-12.4213	30.7452
0	0	0	0	0	1	0	0	0	0	0	-2.66987	WP710	M000001	1	0	WikiPathways	27	DNA damage response only ATM dependent		-3.10802	6.98754	5.09063	30284	110	197	5	2.53807	1.12056	595|2064|4193|5290|5728	CCND1|ERBB2|MDM2|PIK3CA|PTEN	-1.70837	0	13	0	0	-12.4213	30.7452
0	0	0	0	0	1	0	0	0	0	0	-2.56265	WP5470	M000001	1	0	WikiPathways	27	Effect of omega 3 PUFA on Huntington 39 s disease pathways		-2.93837	6.40525	4.8007	30284	120	197	5	2.53807	1.12056	712|1956|1978|5290|5728	C1QA|EGFR|EIF4EBP1|PIK3CA|PTEN	-1.56481	0	13	0	0	-12.4213	30.7452
0	0	0	0	0	1	0	0	0	0	0	-2.9197	hsa05235	M000001	1	0	KEGG Pathway	24	PD-L1 expression and PD-1 checkpoint pathway in cancer		-2.9197	14.421	6.13746	30284	90	70	3	4.28571	2.42076	920|5290|5728	CD4|PIK3CA|PTEN	-1.75998	0	13	0	0	-12.4213	30.7452
0	0	0	0	0	1	0	0	0	0	0	-2.88764	hsa05169	M000001	1	0	KEGG Pathway	24	Epstein-Barr virus infection		-2.88764	8.48291	5.16168	30284	204	70	4	5.71429	2.77431	595|960|5290|7431	CCND1|CD44|PIK3CA|VIM	-1.73356	0	13	0	0	-12.4213	30.7452
0	0	0	0	0	1	0	0	0	0	0	-2.60434	GO:0006661	M000001	1	0	GO Biological Processes	19	phosphatidylinositol biosynthetic process	19_GO:0009987 cellular process	-2.60434	11.1887	5.29197	30284	116	70	3	4.28571	2.42076	5290|5728|26751	PIK3CA|PTEN|SH3YL1	-1.49938	0	13	0	0	-12.4213	30.7452
0	0	0	0	0	1	0	0	0	0	0	-2.30729	hsa05224	M000001	1	0	KEGG Pathway	24	Breast cancer		-2.53927	5.19344	4.13811	30284	148	197	5	2.53807	1.12056	595|1956|2064|5290|5728	CCND1|EGFR|ERBB2|PIK3CA|PTEN	-1.22127	0	13	0	0	-12.4213	30.7452
0	0	0	0	0	1	0	0	0	0	0	-2.47408	M186	M000001	1	0	Canonical Pathways	11	PID PDGFRB PATHWAY		-2.47408	10.0611	4.96412	30284	129	70	3	4.28571	2.42076	59|5290|5728	ACTA2|PIK3CA|PTEN	-1.39257	0	13	0	0	-12.4213	30.7452
0	0	0	0	0	1	0	0	0	0	0	-2.4097	WP4630	M000001	1	0	WikiPathways	27	Measles virus infection		-2.4097	9.54328	4.80628	30284	136	70	3	4.28571	2.42076	595|3561|5290	CCND1|IL2RG|PIK3CA	-1.34012	0	13	0	0	-12.4213	30.7452
0	0	0	0	0	1	0	0	0	0	0	-2.3832	hsa05162	M000001	1	0	KEGG Pathway	24	Measles		-2.3832	9.33731	4.74209	30284	139	70	3	4.28571	2.42076	595|3561|5290	CCND1|IL2RG|PIK3CA	-1.31655	0	13	0	0	-12.4213	30.7452
0	0	0	0	0	1	0	0	0	0	0	-2.30729	GO:0046488	M000001	1	0	GO Biological Processes	19	phosphatidylinositol metabolic process	19_GO:0009987 cellular process	-2.30729	8.7695	4.56064	30284	148	70	3	4.28571	2.42076	5290|5728|26751	PIK3CA|PTEN|SH3YL1	-1.25296	0	13	0	0	-12.4213	30.7452
0	0	0	0	0	1	0	0	0	0	0	-2.15532	hsa04630	M000001	1	0	KEGG Pathway	24	JAK-STAT signaling pathway		-2.15532	7.72551	4.20751	30284	168	70	3	4.28571	2.42076	595|3561|5290	CCND1|IL2RG|PIK3CA	-1.12266	0	13	0	0	-12.4213	30.7452
0	0	0	0	0	1	0	0	0	0	0	-2.14123	hsa05225	M000001	1	0	KEGG Pathway	24	Hepatocellular carcinoma		-2.14123	7.63462	4.17543	30284	170	70	3	4.28571	2.42076	595|5290|5728	CCND1|PIK3CA|PTEN	-1.11004	0	13	0	0	-12.4213	30.7452
0	0	0	0	0	1	0	0	0	0	0	-2.13425	GO:0043524	M000001	1	0	GO Biological Processes	19	negative regulation of neuron apoptotic process	19_GO:0048519 negative regulation of biological process	-2.13425	7.58997	4.15958	30284	171	70	3	4.28571	2.42076	595|1524|5290	CCND1|CX3CR1|PIK3CA	-1.1038	0	13	0	0	-12.4213	30.7452
0	0	0	0	0	1	0	0	0	0	0	-2.0452	GO:0046486	M000001	1	0	GO Biological Processes	19	glycerolipid metabolic process	19_GO:0009987 cellular process	-2.0452	4.91623	3.55727	30284	352	70	4	5.71429	2.77431	857|5290|5728|26751	CAV1|PIK3CA|PTEN|SH3YL1	-1.02633	0	13	0	0	-12.4213	30.7452
0	0	1	0	0	1	0	0	-6.71586	0	0	-6.00719	GO:0060346	M001001	2	0	GO Biological Processes	19	bone trabecula formation	19_GO:0032502 developmental process	-6.71586	246.211	27.0894	30284	9	41	3	7.31707	4.06702	1277|4313|7422	COL1A1|MMP2|VEGFA	-4.86572	0	14	0	0	-11.9972	246.211
0	0	1	0	0	1	0	0	-6.29895	0	0	-5.59121	GO:0061430	M001001	2	0	GO Biological Processes	19	bone trabecula morphogenesis	19_GO:0032502 developmental process	-6.29895	184.659	23.4293	30284	12	41	3	7.31707	4.06702	1277|4313|7422	COL1A1|MMP2|VEGFA	-4.52556	0	14	0	0	-11.9972	246.211
0	0	1	0	0	1	0	0	-5.28495	0	0	-4.58127	GO:0060343	M001001	2	0	GO Biological Processes	19	trabecula formation	19_GO:0032502 developmental process	-5.28495	88.6361	16.14	30284	25	41	3	7.31707	4.06702	1277|4313|7422	COL1A1|MMP2|VEGFA	-3.68901	0	14	0	0	-11.9972	246.211
0	0	0	0	0	1	0	0	0	0	0	-4.88249	GO:0055093	M000001	1	0	GO Biological Processes	19	response to hyperoxia	19_GO:0050896 response to stimulus	-4.88249	64.8943	13.7581	30284	20	70	3	4.28571	2.42076	857|1277|4313	CAV1|COL1A1|MMP2	-3.35541	0	14	0	0	-11.9972	246.211
0	0	0	0	0	1	0	0	0	0	0	-4.47831	GO:0036296	M000001	1	0	GO Biological Processes	19	response to increased oxygen levels	19_GO:0050896 response to stimulus	-4.47831	48.0698	11.7776	30284	27	70	3	4.28571	2.42076	857|1277|4313	CAV1|COL1A1|MMP2	-3.01199	0	14	0	0	-11.9972	246.211
0	0	1	0	0	1	0	0	-4.47399	0	0	-3.77683	GO:0061383	M001001	2	0	GO Biological Processes	19	trabecula morphogenesis	19_GO:0032502 developmental process	-4.47399	48.1718	11.7886	30284	46	41	3	7.31707	4.06702	1277|4313|7422	COL1A1|MMP2|VEGFA	-3.00967	0	14	0	0	-11.9972	246.211
0	0	1	0	0	0	0	0	-4.28842	0	0	0	GO:0060324	M001000	1	0	GO Biological Processes	19	face development	19_GO:0032502 developmental process	-4.28842	41.8095	10.9484	30284	53	41	3	7.31707	4.06702	1277|4313|5914	COL1A1|MMP2|RARA	-2.85917	0	14	0	0	-11.9972	246.211
0	0	1	0	0	1	0	0	-4.22811	0	0	-3.32158	GO:0035296	M001001	2	0	GO Biological Processes	19	regulation of tube diameter	19_GO:0065007 biological regulation	-4.22811	18.9393	8.27108	30284	156	41	4	9.7561	4.63399	59|1956|4313|7422	ACTA2|EGFR|MMP2|VEGFA	-2.81181	0	14	0	0	-11.9972	246.211
0	0	1	0	0	1	0	0	-4.22811	0	0	-3.32158	GO:0097746	M001001	2	0	GO Biological Processes	19	blood vessel diameter maintenance	19_GO:0032501 multicellular organismal process	-4.22811	18.9393	8.27108	30284	156	41	4	9.7561	4.63399	59|1956|4313|7422	ACTA2|EGFR|MMP2|VEGFA	-2.81181	0	14	0	0	-11.9972	246.211
0	0	1	0	0	1	0	0	-4.21733	0	0	-3.31112	GO:0035150	M001001	2	0	GO Biological Processes	19	regulation of tube size	19_GO:0065007 biological regulation	-4.21733	18.8187	8.24189	30284	157	41	4	9.7561	4.63399	59|1956|4313|7422	ACTA2|EGFR|MMP2|VEGFA	-2.80254	0	14	0	0	-11.9972	246.211
0	0	1	0	0	0	0	0	-4.12669	0	0	0	GO:0060350	M001000	1	0	GO Biological Processes	19	endochondral bone morphogenesis	19_GO:0032502 developmental process	-4.12669	36.9317	10.2579	30284	60	41	3	7.31707	4.06702	1277|1281|5914	COL1A1|COL3A1|RARA	-2.73216	0	14	0	0	-11.9972	246.211
0	0	0	0	0	1	0	0	0	0	0	-2.015	GO:0051668	M000001	1	0	GO Biological Processes	19	localization within membrane	19_GO:0051179 localization	-3.47818	3.28825	4.42672	30284	561	197	12	6.09137	1.70403	857|999|1956|2064|2316|3728|3875|5764|5788|7070|10430|100133941	CAV1|CDH1|EGFR|ERBB2|FLNA|JUP|KRT18|PTN|PTPRC|THY1|TMEM147|CD24	-2.02501	0	16	0	0	-10.845	6.13788
0	0	0	1	0	0	0	0	0	-5.6418	0	0	M239	M000100	1	0	Canonical Pathways	11	PID A6B1 A6B4 INTEGRIN PATHWAY		-6.27608	20.0512	10.4633	30284	46	197	6	3.04569	1.22431	928|999|1956|2064|3655|5290	CD9|CDH1|EGFR|ERBB2|ITGA6|PIK3CA	-4.35221	0	18	0	0	-10.308	34.7593
0	0	1	0	0	0	0	0	-4.02273	0	0	0	GO:0038084	M001000	1	0	GO Biological Processes	19	vascular endothelial growth factor signaling pathway	19_GO:0050896 response to stimulus	-5.37524	14.1901	8.61405	30284	65	197	6	3.04569	1.22431	1956|2064|2264|2296|5290|7422	EGFR|ERBB2|FGFR4|FOXC1|PIK3CA|VEGFA	-3.62938	0	18	0	0	-10.308	34.7593
0	0	1	0	0	1	0	0	-5.26708	0	0	-2.99146	WP4018	M001001	2	0	WikiPathways	27	Clear cell renal cell carcinoma pathways		-5.26708	34.7593	11.4759	30284	85	41	4	9.7561	4.63399	1956|2597|5728|7422	EGFR|GAPDH|PTEN|VEGFA	-3.67382	0	18	0	0	-10.308	34.7593
0	0	0	0	0	1	0	0	0	0	0	-3.83464	GO:0071364	M000001	1	0	GO Biological Processes	19	cellular response to epidermal growth factor stimulus	19_GO:0050896 response to stimulus	-5.0095	17.4689	8.8459	30284	44	197	5	2.53807	1.12056	1277|1956|2064|2296|6591	COL1A1|EGFR|ERBB2|FOXC1|SNAI2	-3.32949	0	18	0	0	-10.308	34.7593
0	0	1	1	0	0	0	0	-3.73849	-3.22678	0	0	GO:0048009	M001100	2	0	GO Biological Processes	19	insulin-like growth factor receptor signaling pathway	19_GO:0050896 response to stimulus	-4.8184	11.3871	7.57452	30284	81	197	6	3.04569	1.22431	367|1291|1956|2064|2264|5290	AR|COL6A1|EGFR|ERBB2|FGFR4|PIK3CA	-3.15968	0	18	0	0	-10.308	34.7593
0	0	0	0	0	1	0	0	0	0	0	-3.69487	GO:0070849	M000001	1	0	GO Biological Processes	19	response to epidermal growth factor	19_GO:0050896 response to stimulus	-4.77645	15.6863	8.32528	30284	49	197	5	2.53807	1.12056	1277|1956|2064|2296|6591	COL1A1|EGFR|ERBB2|FOXC1|SNAI2	-3.12494	0	18	0	0	-10.308	34.7593
0	0	1	0	0	0	0	0	-2.11356	0	0	0	GO:0071375	M001000	1	0	GO Biological Processes	19	cellular response to peptide hormone stimulus	19_GO:0050896 response to stimulus	-4.54139	5.14133	5.82327	30284	299	197	10	5.07614	1.56394	857|990|1291|1956|2064|2264|2706|4193|5290|5468	CAV1|CDC6|COL6A1|EGFR|ERBB2|FGFR4|GJB2|MDM2|PIK3CA|PPARG	-2.91951	0	18	0	0	-10.308	34.7593
0	0	1	0	0	1	0	0	-4.48565	0	0	-2.42772	GO:0044344	M001001	2	0	GO Biological Processes	19	cellular response to fibroblast growth factor stimulus	19_GO:0050896 response to stimulus	-4.53812	8.03046	6.59987	30284	134	197	7	3.5533	1.31894	960|1277|1956|2064|2264|6422|10631	CD44|COL1A1|EGFR|ERBB2|FGFR4|SFRP1|POSTN	-2.91909	0	18	0	0	-10.308	34.7593
0	0	1	0	0	0	0	0	-3.56127	0	0	0	GO:0035924	M001000	1	0	GO Biological Processes	19	cellular response to vascular endothelial growth factor stimulus	19_GO:0050896 response to stimulus	-4.47563	9.9178	6.96953	30284	93	197	6	3.04569	1.22431	1956|2064|2264|2296|5290|7422	EGFR|ERBB2|FGFR4|FOXC1|PIK3CA|VEGFA	-2.87059	0	18	0	0	-10.308	34.7593
0	0	1	0	0	0	0	0	-4.17082	0	0	0	GO:0038063	M001000	1	0	GO Biological Processes	19	collagen-activated tyrosine kinase receptor signaling pathway	19_GO:0050896 response to stimulus	-4.41629	13.2522	7.55757	30284	58	197	5	2.53807	1.12056	1277|1282|1956|2064|2264	COL1A1|COL4A1|EGFR|ERBB2|FGFR4	-2.81854	0	18	0	0	-10.308	34.7593
0	0	1	0	0	1	0	0	-4.3872	0	0	-2.35731	GO:0071774	M001001	2	0	GO Biological Processes	19	response to fibroblast growth factor	19_GO:0050896 response to stimulus	-4.3872	20.8066	8.71058	30284	142	41	4	9.7561	4.63399	1277|1956|2264|10631	COL1A1|EGFR|FGFR4|POSTN	-2.9366	0	18	0	0	-10.308	34.7593
0	0	1	0	0	0	0	0	-4.08407	0	0	0	GO:0038065	M001000	1	0	GO Biological Processes	19	collagen-activated signaling pathway	19_GO:0050896 response to stimulus	-4.27552	12.3972	7.26905	30284	62	197	5	2.53807	1.12056	1277|1282|1956|2064|2264	COL1A1|COL4A1|EGFR|ERBB2|FGFR4	-2.70912	0	18	0	0	-10.308	34.7593
0	0	1	0	0	0	0	0	-4.02273	0	0	0	WP3651	M001000	1	0	WikiPathways	27	Pathways affected in adenoid cystic carcinoma		-4.17637	11.8251	7.06953	30284	65	197	5	2.53807	1.12056	2064|2264|5290|5728|58508	ERBB2|FGFR4|PIK3CA|PTEN|KMT2C	-2.62807	0	18	0	0	-10.308	34.7593
0	0	1	0	0	0	0	0	-3.75447	0	0	0	GO:0048010	M001000	1	0	GO Biological Processes	19	vascular endothelial growth factor receptor signaling pathway	19_GO:0050896 response to stimulus	-3.75447	27.6988	8.80406	30284	80	41	3	7.31707	4.06702	1956|2264|7422	EGFR|FGFR4|VEGFA	-2.43001	0	18	0	0	-10.308	34.7593
0	0	1	0	0	0	0	0	-3.70713	0	0	0	GO:0048013	M001000	1	0	GO Biological Processes	19	ephrin receptor signaling pathway	19_GO:0050896 response to stimulus	-3.70713	26.6976	8.63178	30284	83	41	3	7.31707	4.06702	1956|2264|4313	EGFR|FGFR4|MMP2	-2.39149	0	18	0	0	-10.308	34.7593
0	0	1	0	0	0	0	0	-3.67655	0	0	0	GO:0048008	M001000	1	0	GO Biological Processes	19	platelet-derived growth factor receptor signaling pathway	19_GO:0050896 response to stimulus	-3.67655	26.0694	8.52191	30284	85	41	3	7.31707	4.06702	1956|2264|7422	EGFR|FGFR4|VEGFA	-2.36653	0	18	0	0	-10.308	34.7593
0	0	0	1	0	0	0	0	0	-3.15089	0	0	R-HSA-2219528	M000100	1	0	Reactome Gene Sets	6	PI3K/AKT Signaling in Cancer		-3.59932	8.93755	5.96472	30284	86	197	5	2.53807	1.12056	942|2064|2264|4193|5290	CD86|ERBB2|FGFR4|MDM2|PIK3CA	-2.12966	0	18	0	0	-10.308	34.7593
0	0	1	0	0	0	0	0	-3.41626	0	0	0	hsa04020	M001000	1	0	KEGG Pathway	24	Calcium signaling pathway		-3.41626	11.632	6.26519	30284	254	41	4	9.7561	4.63399	1956|2264|4638|7422	EGFR|FGFR4|MYLK|VEGFA	-2.15464	0	18	0	0	-10.308	34.7593
0	0	0	1	0	0	0	0	0	-3.02533	0	0	GO:0007173	M000100	1	0	GO Biological Processes	19	epidermal growth factor receptor signaling pathway	19_GO:0050896 response to stimulus	-3.39872	8.09084	5.60116	30284	95	197	5	2.53807	1.12056	1956|2064|2264|2886|5290	EGFR|ERBB2|FGFR4|GRB7|PIK3CA	-1.95197	0	18	0	0	-10.308	34.7593
0	0	1	0	0	0	0	0	-3.32843	0	0	0	GO:0032868	M001000	1	0	GO Biological Processes	19	response to insulin	19_GO:0050896 response to stimulus	-3.32843	11.0244	6.06915	30284	268	41	4	9.7561	4.63399	1277|1291|1956|2264	COL1A1|COL6A1|EGFR|FGFR4	-2.08636	0	18	0	0	-10.308	34.7593
0	0	1	0	0	0	0	0	-3.29087	0	0	0	GO:0008286	M001000	1	0	GO Biological Processes	19	insulin receptor signaling pathway	19_GO:0050896 response to stimulus	-3.29087	19.2687	7.22696	30284	115	41	3	7.31707	4.06702	1291|1956|2264	COL6A1|EGFR|FGFR4	-2.05663	0	18	0	0	-10.308	34.7593
0	0	1	0	0	0	0	0	-3.25824	0	0	0	WP3931	M001000	1	0	WikiPathways	27	Embryonic stem cell pluripotency pathways		-3.25824	18.7788	7.12466	30284	118	41	3	7.31707	4.06702	1956|2264|5728	EGFR|FGFR4|PTEN	-2.03143	0	18	0	0	-10.308	34.7593
0	0	1	0	0	0	0	0	-3.14498	0	0	0	hsa04010	M001000	1	0	KEGG Pathway	24	MAPK signaling pathway		-3.14498	9.84846	5.67103	30284	300	41	4	9.7561	4.63399	1956|2264|2316|7422	EGFR|FGFR4|FLNA|VEGFA	-1.94004	0	18	0	0	-10.308	34.7593
0	0	0	1	0	0	0	0	0	-2.81927	0	0	GO:0038127	M000100	1	0	GO Biological Processes	19	ERBB signaling pathway	19_GO:0050896 response to stimulus	-3.07271	6.86276	5.02982	30284	112	197	5	2.53807	1.12056	1956|2064|2264|2886|5290	EGFR|ERBB2|FGFR4|GRB7|PIK3CA	-1.67817	0	18	0	0	-10.308	34.7593
0	0	1	0	0	0	0	0	-3.0517	0	0	0	GO:0007623	M001000	1	0	GO Biological Processes	19	circadian rhythm	19_GO:0048511 rhythmic process	-3.0517	15.9417	6.501	30284	139	41	3	7.31707	4.06702	1291|1956|5728	COL6A1|EGFR|PTEN	-1.86523	0	18	0	0	-10.308	34.7593
0	0	1	0	0	1	0	0	-2.95625	0	0	-2.29111	WP51	M001001	2	0	WikiPathways	27	Regulation of actin cytoskeleton		-2.95625	14.7727	6.22608	30284	150	41	3	7.31707	4.06702	1956|2264|4638	EGFR|FGFR4|MYLK	-1.78896	0	18	0	0	-10.308	34.7593
0	0	1	0	0	0	0	0	-2.6119	0	0	0	GO:0032869	M001000	1	0	GO Biological Processes	19	cellular response to insulin stimulus	19_GO:0050896 response to stimulus	-2.71226	4.65836	4.17907	30284	198	197	6	3.04569	1.22431	1291|1956|2064|2264|5290|5468	COL6A1|EGFR|ERBB2|FGFR4|PIK3CA|PPARG	-1.37431	0	18	0	0	-10.308	34.7593
0	0	0	1	0	0	0	0	0	-2.11299	0	0	R-HSA-1257604	M000100	1	0	Reactome Gene Sets	6	PIP3 activates AKT signaling		-2.69035	4.61178	4.14678	30284	200	197	6	3.04569	1.22431	942|2064|2264|4193|5290|6591	CD86|ERBB2|FGFR4|MDM2|PIK3CA|SNAI2	-1.35691	0	18	0	0	-10.308	34.7593
0	0	1	0	0	0	0	0	-2.52814	0	0	0	hsa04015	M001000	1	0	KEGG Pathway	24	Rap1 signaling pathway		-2.52814	10.4524	5.08518	30284	212	41	3	7.31707	4.06702	1956|2264|7422	EGFR|FGFR4|VEGFA	-1.43689	0	18	0	0	-10.308	34.7593
0	0	1	0	0	0	0	0	-2.44474	0	0	0	hsa05208	M001000	1	0	KEGG Pathway	24	Chemical carcinogenesis - reactive oxygen species		-2.44474	9.76168	4.87873	30284	227	41	3	7.31707	4.06702	1956|5728|7422	EGFR|PTEN|VEGFA	-1.36924	0	18	0	0	-10.308	34.7593
0	0	1	0	0	0	0	0	-2.38728	0	0	0	hsa04014	M001000	1	0	KEGG Pathway	24	Ras signaling pathway		-2.38728	9.31051	4.73917	30284	238	41	3	7.31707	4.06702	1956|2264|7422	EGFR|FGFR4|VEGFA	-1.31957	0	18	0	0	-10.308	34.7593
0	0	1	0	0	0	0	0	-2.34236	0	0	0	WP382	M001000	1	0	WikiPathways	27	MAPK signaling		-2.34236	8.97126	4.63155	30284	247	41	3	7.31707	4.06702	1956|2264|2316	EGFR|FGFR4|FLNA	-1.28258	0	18	0	0	-10.308	34.7593
0	0	1	0	0	0	0	0	-2.12553	0	0	0	GO:0051054	M001000	1	0	GO Biological Processes	19	positive regulation of DNA metabolic process	19_GO:0048518 positive regulation of biological process	-2.12553	7.48616	4.12894	30284	296	41	3	7.31707	4.06702	1956|2264|7422	EGFR|FGFR4|VEGFA	-1.09703	0	18	0	0	-10.308	34.7593
0	0	0	0	0	1	0	0	0	0	0	-8.54778	GO:0002274	M000001	1	0	GO Biological Processes	19	myeloid leukocyte activation	19_GO:0002376 immune system process	-8.54778	22.3292	12.8142	30284	155	70	8	11.4286	3.80272	199|712|1524|2205|2207|2214|22918|84868	AIF1|C1QA|CX3CR1|FCER1A|FCER1G|FCGR3A|CD93|HAVCR2	-6.42625	0	19	0	0	-10.2874	43.2629
0	0	0	0	0	1	0	0	0	0	0	-8.12479	GO:0042116	M000001	1	0	GO Biological Processes	19	macrophage activation	19_GO:0002376 immune system process	-8.12479	41.2027	15.375	30284	63	70	6	8.57143	3.34594	199|712|1524|2214|22918|84868	AIF1|C1QA|CX3CR1|FCGR3A|CD93|HAVCR2	-6.06238	0	19	0	0	-10.2874	43.2629
0	0	0	0	0	1	0	0	0	0	0	-5.6486	GO:0061900	M000001	1	0	GO Biological Processes	19	glial cell activation	19_GO:0032501 multicellular organismal process	-5.6486	43.2629	12.874	30284	40	70	4	5.71429	2.77431	199|712|1524|9839	AIF1|C1QA|CX3CR1|ZEB2	-3.98043	0	19	0	0	-10.2874	43.2629
0	0	0	0	0	1	0	0	0	0	0	-5.15273	GO:0150076	M000001	1	0	GO Biological Processes	19	neuroinflammatory response	19_GO:0050896 response to stimulus	-5.15273	32.6512	11.1006	30284	53	70	4	5.71429	2.77431	199|712|1524|9839	AIF1|C1QA|CX3CR1|ZEB2	-3.57612	0	19	0	0	-10.2874	43.2629
0	0	0	0	0	1	0	0	0	0	0	-4.25255	GO:0001774	M000001	1	0	GO Biological Processes	19	microglial cell activation	19_GO:0002376 immune system process	-4.25255	40.5589	10.7767	30284	32	70	3	4.28571	2.42076	199|712|1524	AIF1|C1QA|CX3CR1	-2.82999	0	19	0	0	-10.2874	43.2629
0	0	0	0	0	1	0	0	0	0	0	-4.13428	GO:0002269	M000001	1	0	GO Biological Processes	19	leukocyte activation involved in inflammatory response	19_GO:0002376 immune system process	-4.13428	37.0824	10.2806	30284	35	70	3	4.28571	2.42076	199|712|1524	AIF1|C1QA|CX3CR1	-2.73691	0	19	0	0	-10.2874	43.2629
0	0	0	0	0	1	0	0	0	0	0	-4.47625	hsa04514	M000001	1	0	KEGG Pathway	24	Cell adhesion molecules		-5.01188	7.78359	6.91768	30284	158	197	8	4.06091	1.4063	920|942|999|1001|3655|5175|5788|6385	CD4|CD86|CDH1|CDH3|ITGA6|PECAM1|PTPRC|SDC4	-3.33077	0	21	0	0	-10.204	10.7608
0	0	0	1	0	0	0	0	0	-2.63461	0	0	GO:0007043	M000100	1	0	GO Biological Processes	19	cell-cell junction assembly	19_GO:0009987 cellular process	-3.66851	7.09504	5.63532	30284	130	197	6	3.04569	1.22431	928|999|1001|2706|3728|5175	CD9|CDH1|CDH3|GJB2|JUP|PECAM1	-2.18688	0	21	0	0	-10.204	10.7608
0	0	0	0	1	0	0	0	0	0	-10.1989	0	R-HSA-453279	M000010	1	0	Reactome Gene Sets	6	Mitotic G1 phase and G1/S transition		-10.1989	51.9578	18.7514	30284	120	34	7	20.5882	6.93446	891|990|4605|6241|7153|7298|23594	CCNB1|CDC6|MYBL2|RRM2|TOP2A|TYMS|ORC6	-7.86842	0	22	1	1	-10.1989	102.774
0	0	0	0	1	0	0	0	0	0	-9.16538	0	WP2446	M000010	1	0	WikiPathways	27	Retinoblastoma gene in cancer		-9.16538	60.0476	18.7028	30284	89	34	6	17.6471	6.53787	891|4193|6241|7153|7298|54443	CCNB1|MDM2|RRM2|TOP2A|TYMS|ANLN	-6.97539	0	22	0	0	-10.1989	102.774
0	0	0	0	1	0	0	0	0	0	-6.89111	0	R-HSA-69206	M000010	1	0	Reactome Gene Sets	6	G1/S Transition		-6.89111	41.6218	14.112	30284	107	34	5	14.7059	6.07387	891|990|6241|7298|23594	CCNB1|CDC6|RRM2|TYMS|ORC6	-5.01775	0	22	0	0	-10.1989	102.774
0	0	0	0	1	0	0	0	0	0	-5.86522	0	M40	M000010	1	0	Canonical Pathways	11	PID E2F PATHWAY		-5.86522	48.8058	13.7099	30284	73	34	4	11.7647	5.52551	990|4605|6241|7298	CDC6|MYBL2|RRM2|TYMS	-4.16166	0	22	0	0	-10.1989	102.774
0	0	0	0	1	0	0	0	0	0	-5.48115	0	R-HSA-69205	M000010	1	0	Reactome Gene Sets	6	G1/S-Specific Transcription		-5.48115	102.774	17.4052	30284	26	34	3	8.82353	4.86433	990|6241|7298	CDC6|RRM2|TYMS	-3.84864	0	22	0	0	-10.1989	102.774
0	0	0	0	1	0	0	0	0	0	-5.28893	0	GO:0051984	M000010	1	0	GO Biological Processes	19	positive regulation of chromosome segregation	19_GO:0048518 positive regulation of biological process	-5.28893	89.0706	16.1799	30284	30	34	3	8.82353	4.86433	332|891|990	BIRC5|CCNB1|CDC6	-3.69208	0	22	0	0	-10.1989	102.774
0	0	0	0	1	0	0	0	0	0	-4.21014	0	R-HSA-69052	M000010	1	0	Reactome Gene Sets	6	Switching of origins to a post-replicative state		-4.21014	39.2958	10.599	30284	68	34	3	8.82353	4.86433	990|11065|23594	CDC6|UBE2C|ORC6	-2.79713	0	22	0	0	-10.1989	102.774
0	0	0	0	1	0	0	0	0	0	-3.76447	0	R-HSA-69239	M000010	1	0	Reactome Gene Sets	6	Synthesis of DNA		-3.76447	27.8346	8.82854	30284	96	34	3	8.82353	4.86433	990|11065|23594	CDC6|UBE2C|ORC6	-2.43688	0	22	0	0	-10.1989	102.774
0	0	0	0	1	0	0	0	0	0	-3.45792	0	R-HSA-68867	M000010	1	0	Reactome Gene Sets	6	Assembly of the pre-replicative complex		-3.45792	21.9026	7.7558	30284	122	34	3	8.82353	4.86433	990|11065|23594	CDC6|UBE2C|ORC6	-2.18619	0	22	0	0	-10.1989	102.774
0	0	0	0	1	0	0	0	0	0	-3.36743	0	R-HSA-69242	M000010	1	0	Reactome Gene Sets	6	S Phase		-3.36743	20.3978	7.45933	30284	131	34	3	8.82353	4.86433	990|11065|23594	CDC6|UBE2C|ORC6	-2.11732	0	22	0	0	-10.1989	102.774
0	0	0	0	1	0	0	0	0	0	-3.35778	0	R-HSA-69481	M000010	1	0	Reactome Gene Sets	6	G2/M Checkpoints		-3.35778	20.2433	7.42822	30284	132	34	3	8.82353	4.86433	891|990|23594	CCNB1|CDC6|ORC6	-2.1101	0	22	0	0	-10.1989	102.774
0	0	0	0	1	0	0	0	0	0	-3.31064	0	R-HSA-69002	M000010	1	0	Reactome Gene Sets	6	DNA Replication Pre-Initiation		-3.31064	19.5045	7.27766	30284	137	34	3	8.82353	4.86433	990|11065|23594	CDC6|UBE2C|ORC6	-2.0725	0	22	0	0	-10.1989	102.774
0	0	0	0	1	0	0	0	0	0	-3.04595	0	R-HSA-69306	M000010	1	0	Reactome Gene Sets	6	DNA Replication		-3.04595	15.8113	6.47325	30284	169	34	3	8.82353	4.86433	990|11065|23594	CDC6|UBE2C|ORC6	-1.86053	0	22	0	0	-10.1989	102.774
0	0	0	0	1	0	0	0	0	0	-9.81597	0	WP2361	M000010	1	0	WikiPathways	27	Gastric cancer network 1		-9.81597	153.57	27.5579	30284	29	34	5	14.7059	6.07387	1063|4605|6790|7153|11065	CENPF|MYBL2|AURKA|TOP2A|UBE2C	-7.5273	0	23	1	1	-9.81597	153.57
0	0	0	0	1	0	0	0	0	0	-5.64691	0	R-HSA-1538133	M000010	1	0	Reactome Gene Sets	6	G0 and Early G1		-5.64691	116.179	18.5256	30284	23	34	3	8.82353	4.86433	990|4605|7153	CDC6|MYBL2|TOP2A	-3.97979	0	23	0	0	-9.81597	153.57
0	0	0	0	1	0	0	0	0	0	-5.24506	0	WP2363	M000010	1	0	WikiPathways	27	Gastric cancer network 2		-5.24506	86.1973	15.9111	30284	31	34	3	8.82353	4.86433	7153|11065|29089	TOP2A|UBE2C|UBE2T	-3.65536	0	23	0	0	-9.81597	153.57
0	0	0	1	0	1	0	0	0	-2.9005	0	-5.40693	GO:2001233	M000101	2	0	GO Biological Processes	19	regulation of apoptotic signaling pathway	19_GO:0050896 response to stimulus	-9.79713	6.935	9.65659	30284	399	197	18	9.13706	2.05288	367|857|960|1491|1524|2017|3655|4193|4313|4582|5468|5788|6279|6387|6422|6591|8626|81618	AR|CAV1|CD44|CTH|CX3CR1|CTTN|ITGA6|MDM2|MMP2|MUC1|PPARG|PTPRC|S100A8|CXCL12|SFRP1|SNAI2|TP63|ITM2C	-7.21928	0	24	1	1	-9.79713	6.935
0	0	0	1	0	0	0	0	0	-3.88052	0	0	GO:2001234	M000100	1	0	GO Biological Processes	19	negative regulation of apoptotic signaling pathway	19_GO:0048519 negative regulation of biological process	-5.32134	6.32617	6.74534	30284	243	197	10	5.07614	1.56394	367|960|1491|1524|2017|3655|4193|4582|6387|6591	AR|CD44|CTH|CX3CR1|CTTN|ITGA6|MDM2|MUC1|CXCL12|SNAI2	-3.58302	0	24	0	0	-9.79713	6.935
0	0	0	0	0	1	0	0	0	0	0	-3.01008	GO:2001242	M000001	1	0	GO Biological Processes	19	regulation of intrinsic apoptotic signaling pathway	19_GO:0050896 response to stimulus	-4.45078	6.50692	6.14519	30284	189	197	8	4.06091	1.4063	857|960|4193|4313|4582|6279|6387|6591	CAV1|CD44|MDM2|MMP2|MUC1|S100A8|CXCL12|SNAI2	-2.8494	0	24	0	0	-9.79713	6.935
0	0	0	0	0	1	0	0	0	0	0	-2.82679	GO:0080135	M000001	1	0	GO Biological Processes	19	regulation of cellular response to stress	19_GO:0050896 response to stimulus	-3.66454	3.44806	4.6228	30284	535	197	12	6.09137	1.70403	857|960|1956|2316|4193|4582|5764|6387|6591|6659|7070|57162	CAV1|CD44|EGFR|FLNA|MDM2|MUC1|PTN|CXCL12|SNAI2|SOX4|THY1|PELI1	-2.18399	0	24	0	0	-9.79713	6.935
0	0	1	1	0	0	0	0	-2.53246	-2.71003	0	0	GO:0040007	M001100	2	0	GO Biological Processes	19	growth	19_GO:0040007 growth	-5.87728	4.88019	6.64192	30284	441	197	14	7.1066	1.83059	367|928|1281|1291|2296|2625|5764|5914|6422|6790|7298|8085|9968|10631	AR|CD9|COL3A1|COL6A1|FOXC1|GATA3|PTN|RARA|SFRP1|AURKA|TYMS|KMT2D|MED12|POSTN	-4.01402	0	25	0	0	-9.74314	9.22355
0	0	1	1	0	0	0	0	-2.53246	-2.71003	0	0	GO:0048589	M001100	2	0	GO Biological Processes	19	developmental growth	19_GO:0040007 growth	-5.87728	4.88019	6.64192	30284	441	197	14	7.1066	1.83059	367|928|1281|1291|2296|2625|5764|5914|6422|6790|7298|8085|9968|10631	AR|CD9|COL3A1|COL6A1|FOXC1|GATA3|PTN|RARA|SFRP1|AURKA|TYMS|KMT2D|MED12|POSTN	-4.01402	0	25	0	0	-9.74314	9.22355
0	0	1	0	0	0	0	0	-2.66267	0	0	0	GO:0048736	M001000	1	0	GO Biological Processes	19	appendage development	19_GO:0032502 developmental process	-2.80265	4.8545	4.31269	30284	190	197	6	3.04569	1.22431	1281|1291|3655|5914|7020|8626	COL3A1|COL6A1|ITGA6|RARA|TFAP2A|TP63	-1.44909	0	25	0	0	-9.74314	9.22355
0	0	1	0	0	0	0	0	-2.66267	0	0	0	GO:0060173	M001000	1	0	GO Biological Processes	19	limb development	19_GO:0032502 developmental process	-2.80265	4.8545	4.31269	30284	190	197	6	3.04569	1.22431	1281|1291|3655|5914|7020|8626	COL3A1|COL6A1|ITGA6|RARA|TFAP2A|TP63	-1.44909	0	25	0	0	-9.74314	9.22355
0	0	0	0	1	0	0	0	0	0	-9.48644	0	GO:0006259	M000010	1	0	GO Biological Processes	19	DNA metabolic process	19_GO:0009987 cellular process	-9.48644	13.1162	11.2413	30284	747	34	11	32.3529	8.02309	990|1063|3159|7153|7298|9156|9232|9582|9768|23594|29089	CDC6|CENPF|HMGA1|TOP2A|TYMS|EXO1|PTTG1|APOBEC3B|PCLAF|ORC6|UBE2T	-7.24397	0	27	1	1	-9.48644	25.4487
0	0	0	0	1	0	0	0	0	0	-5.56721	0	GO:0006260	M000010	1	0	GO Biological Processes	19	DNA replication	19_GO:0009987 cellular process	-5.56721	22.4926	10.1722	30284	198	34	5	14.7059	6.07387	990|3159|9156|9768|23594	CDC6|HMGA1|EXO1|PCLAF|ORC6	-3.92179	0	27	0	0	-9.48644	25.4487
0	0	0	0	1	0	0	0	0	0	-4.73955	0	GO:0006261	M000010	1	0	GO Biological Processes	19	DNA-templated DNA replication	19_GO:0009987 cellular process	-4.73955	25.4487	9.72067	30284	140	34	4	11.7647	5.52551	990|3159|9156|23594	CDC6|HMGA1|EXO1|ORC6	-3.23322	0	27	0	0	-9.48644	25.4487
0	0	0	0	1	0	0	0	0	0	-3.56479	0	GO:0006281	M000010	1	0	GO Biological Processes	19	DNA repair	19_GO:0050896 response to stimulus	-3.56479	8.54804	5.82628	30284	521	34	5	14.7059	6.07387	3159|9156|9232|9768|29089	HMGA1|EXO1|PTTG1|PCLAF|UBE2T	-2.27612	0	27	0	0	-9.48644	25.4487
0	0	0	0	0	1	0	0	0	0	0	-3.00634	GO:0010951	M000001	1	0	GO Biological Processes	19	negative regulation of endopeptidase activity	19_GO:0048519 negative regulation of biological process	-4.72764	10.9804	7.41188	30284	84	197	6	3.04569	1.22431	332|960|2597|5272|7076|7422	BIRC5|CD44|GAPDH|SERPINB9|TIMP1|VEGFA	-3.08524	0	28	0	0	-9.44961	10.9804
0	0	0	0	0	1	0	0	0	0	0	-2.86528	GO:0010466	M000001	1	0	GO Biological Processes	19	negative regulation of peptidase activity	19_GO:0048519 negative regulation of biological process	-4.44932	9.81229	6.92412	30284	94	197	6	3.04569	1.22431	332|960|2597|5272|7076|7422	BIRC5|CD44|GAPDH|SERPINB9|TIMP1|VEGFA	-2.84885	0	28	0	0	-9.44961	10.9804
0	0	0	0	0	1	0	0	0	0	0	-2.35731	GO:0051346	M000001	1	0	GO Biological Processes	19	negative regulation of hydrolase activity	19_GO:0065007 biological regulation	-4.37684	7.57804	6.35766	30284	142	197	7	3.5533	1.31894	332|341|960|2597|5272|7076|7422	BIRC5|APOC1|CD44|GAPDH|SERPINB9|TIMP1|VEGFA	-2.78891	0	28	0	0	-9.44961	10.9804
0	0	1	0	0	1	0	0	-2.47709	0	0	-2.38234	GO:0051336	M001001	2	0	GO Biological Processes	19	regulation of hydrolase activity	19_GO:0065007 biological regulation	-4.30447	4.03657	5.29272	30284	457	197	12	6.09137	1.70403	332|341|960|2597|3655|5272|6279|6422|7070|7076|7422|51520	BIRC5|APOC1|CD44|GAPDH|ITGA6|SERPINB9|S100A8|SFRP1|THY1|TIMP1|VEGFA|LARS1	-2.72872	0	28	0	0	-9.44961	10.9804
0	0	1	0	0	0	0	0	-2.63701	0	0	0	GO:0052548	M001000	1	0	GO Biological Processes	19	regulation of endopeptidase activity	19_GO:0050789 regulation of biological process	-3.53358	5.54681	5.14091	30284	194	197	7	3.5533	1.31894	332|960|2597|5272|6279|7076|7422	BIRC5|CD44|GAPDH|SERPINB9|S100A8|TIMP1|VEGFA	-2.07389	0	28	0	0	-9.44961	10.9804
0	0	0	0	1	0	0	0	0	0	-2.80493	0	GO:0045861	M000010	1	0	GO Biological Processes	19	negative regulation of proteolysis	19_GO:0048519 negative regulation of biological process	-3.3893	5.24918	4.93962	30284	205	197	7	3.5533	1.31894	332|960|2597|4193|5272|7076|7422	BIRC5|CD44|GAPDH|MDM2|SERPINB9|TIMP1|VEGFA	-1.94382	0	28	0	0	-9.44961	10.9804
0	0	1	0	0	0	0	0	-2.51665	0	0	0	GO:0052547	M001000	1	0	GO Biological Processes	19	regulation of peptidase activity	19_GO:0050789 regulation of biological process	-3.27799	5.02842	4.78539	30284	214	197	7	3.5533	1.31894	332|960|2597|5272|6279|7076|7422	BIRC5|CD44|GAPDH|SERPINB9|S100A8|TIMP1|VEGFA	-1.85119	0	28	0	0	-9.44961	10.9804
0	0	0	0	0	1	0	0	0	0	0	-3.65141	GO:1901342	M000001	1	0	GO Biological Processes	19	regulation of vasculature development	19_GO:0032502 developmental process	-5.18352	4.9589	6.21679	30284	372	197	12	6.09137	1.70403	1524|2064|2296|3687|3728|5468|6387|6422|6678|7422|7453|7852	CX3CR1|ERBB2|FOXC1|ITGAX|JUP|PPARG|CXCL12|SFRP1|SPARC|VEGFA|WARS1|CXCR4	-3.47649	0	29	0	0	-9.13593	22.3773
0	0	0	0	0	1	0	0	0	0	0	-3.70861	GO:0045765	M000001	1	0	GO Biological Processes	19	regulation of angiogenesis	19_GO:0032502 developmental process	-4.54689	4.65836	5.67407	30284	363	197	11	5.58376	1.63589	1524|2064|2296|3687|3728|5468|6422|6678|7422|7453|7852	CX3CR1|ERBB2|FOXC1|ITGAX|JUP|PPARG|SFRP1|SPARC|VEGFA|WARS1|CXCR4	-2.92405	0	29	0	0	-9.13593	22.3773
0	0	0	0	0	1	0	0	0	0	0	-3.47738	R-HSA-380108	M000001	1	0	Reactome Gene Sets	6	Chemokine receptors bind chemokines		-3.47738	22.3773	7.84371	30284	58	70	3	4.28571	2.42076	1524|7852|58191	CX3CR1|CXCR4|CXCL16	-2.20309	0	29	0	0	-9.13593	22.3773
0	0	0	0	0	1	0	0	0	0	0	-3.22999	WP3929	M000001	1	0	WikiPathways	27	Chemokine signaling		-3.22999	10.488	5.88219	30284	165	70	4	5.71429	2.77431	1524|5290|7852|58191	CX3CR1|PIK3CA|CXCR4|CXCL16	-2.00852	0	29	0	0	-9.13593	22.3773
0	0	0	0	0	1	0	0	0	0	0	-3.19359	hsa04060	M000001	1	0	KEGG Pathway	24	Cytokine-cytokine receptor interaction		-3.19359	7.25887	5.22624	30284	298	70	5	7.14286	3.07818	920|1524|3561|7852|58191	CD4|CX3CR1|IL2RG|CXCR4|CXCL16	-1.97758	0	29	0	0	-9.13593	22.3773
0	0	0	0	0	1	0	0	0	0	0	-3.191	GO:0019722	M000001	1	0	GO Biological Processes	19	calcium-mediated signaling	19_GO:0050896 response to stimulus	-3.191	10.2397	5.7977	30284	169	70	4	5.71429	2.77431	920|1524|2214|7852	CD4|CX3CR1|FCGR3A|CXCR4	-1.97557	0	29	0	0	-9.13593	22.3773
0	0	0	0	0	1	0	0	0	0	0	-3.16646	GO:0070098	M000001	1	0	GO Biological Processes	19	chemokine-mediated signaling pathway	19_GO:0050896 response to stimulus	-3.16646	17.539	6.85637	30284	74	70	3	4.28571	2.42076	1524|2296|7852	CX3CR1|FOXC1|CXCR4	-1.95698	0	29	0	0	-9.13593	22.3773
0	0	0	0	0	1	0	0	0	0	0	-3.02142	GO:1990868	M000001	1	0	GO Biological Processes	19	response to chemokine	19_GO:0050896 response to stimulus	-3.02142	15.6372	6.42732	30284	83	70	3	4.28571	2.42076	1524|2296|7852	CX3CR1|FOXC1|CXCR4	-1.84155	0	29	0	0	-9.13593	22.3773
0	0	0	0	0	1	0	0	0	0	0	-3.02142	GO:1990869	M000001	1	0	GO Biological Processes	19	cellular response to chemokine	19_GO:0050896 response to stimulus	-3.02142	15.6372	6.42732	30284	83	70	3	4.28571	2.42076	1524|2296|7852	CX3CR1|FOXC1|CXCR4	-1.84155	0	29	0	0	-9.13593	22.3773
0	0	0	0	0	1	0	0	0	0	0	-2.97641	hsa04062	M000001	1	0	KEGG Pathway	24	Chemokine signaling pathway		-2.97641	8.9664	5.344	30284	193	70	4	5.71429	2.77431	1524|5290|7852|58191	CX3CR1|PIK3CA|CXCR4|CXCL16	-1.80441	0	29	0	0	-9.13593	22.3773
0	0	0	0	0	1	0	0	0	0	0	-2.78811	hsa04061	M000001	1	0	KEGG Pathway	24	Viral protein interaction with cytokine and cytokine receptor		-2.78811	12.9789	5.77526	30284	100	70	3	4.28571	2.42076	1524|3561|7852	CX3CR1|IL2RG|CXCR4	-1.65185	0	29	0	0	-9.13593	22.3773
0	0	0	0	0	1	0	0	0	0	0	-2.76348	R-HSA-9758941	M000001	1	0	Reactome Gene Sets	6	Gastrulation		-2.76348	12.7244	5.709	30284	102	70	3	4.28571	2.42076	2296|7852|9839	FOXC1|CXCR4|ZEB2	-1.63157	0	29	0	0	-9.13593	22.3773
0	0	0	0	0	1	0	0	0	0	0	-2.53565	WP5473	M000001	1	0	WikiPathways	27	Cytokine cytokine receptor interaction		-2.53565	6.78633	4.46629	30284	255	70	4	5.71429	2.77431	1524|3561|7852|58191	CX3CR1|IL2RG|CXCR4|CXCL16	-1.44271	0	29	0	0	-9.13593	22.3773
0	0	0	0	0	1	0	0	0	0	0	-2.34243	R-HSA-418594	M000001	1	0	Reactome Gene Sets	6	G alpha (i) signalling events		-2.34243	5.98794	4.101	30284	289	70	4	5.71429	2.77431	1524|1880|7852|58191	CX3CR1|GPR183|CXCR4|CXCL16	-1.28258	0	29	0	0	-9.13593	22.3773
0	0	0	0	0	1	0	0	0	0	0	-2.21359	GO:0016525	M000001	1	0	GO Biological Processes	19	negative regulation of angiogenesis	19_GO:0032502 developmental process	-2.21359	8.11179	4.34137	30284	160	70	3	4.28571	2.42076	1524|2296|6678	CX3CR1|FOXC1|SPARC	-1.1713	0	29	0	0	-9.13593	22.3773
0	0	0	0	0	1	0	0	0	0	0	-2.20665	R-HSA-373076	M000001	1	0	Reactome Gene Sets	6	Class A/1 (Rhodopsin-like receptors)		-2.20665	5.47631	3.85016	30284	316	70	4	5.71429	2.77431	1524|1880|7852|58191	CX3CR1|GPR183|CXCR4|CXCL16	-1.16555	0	29	0	0	-9.13593	22.3773
0	0	0	0	0	1	0	0	0	0	0	-2.19873	GO:2000181	M000001	1	0	GO Biological Processes	19	negative regulation of blood vessel morphogenesis	19_GO:0032502 developmental process	-2.19873	8.01164	4.30705	30284	162	70	3	4.28571	2.42076	1524|2296|6678	CX3CR1|FOXC1|SPARC	-1.15938	0	29	0	0	-9.13593	22.3773
0	0	0	0	0	1	0	0	0	0	0	-2.18406	GO:1901343	M000001	1	0	GO Biological Processes	19	negative regulation of vasculature development	19_GO:0032502 developmental process	-2.18406	7.91394	4.27331	30284	164	70	3	4.28571	2.42076	1524|2296|6678	CX3CR1|FOXC1|SPARC	-1.14646	0	29	0	0	-9.13593	22.3773
0	0	0	0	0	1	0	0	0	0	0	-2.16959	GO:0007204	M000001	1	0	GO Biological Processes	19	positive regulation of cytosolic calcium ion concentration	19_GO:0065007 biological regulation	-2.16959	7.81859	4.24014	30284	166	70	3	4.28571	2.42076	857|1524|7852	CAV1|CX3CR1|CXCR4	-1.13398	0	29	0	0	-9.13593	22.3773
0	0	0	0	0	1	0	0	0	0	0	-2.0097	R-HSA-375276	M000001	1	0	Reactome Gene Sets	6	Peptide ligand-binding receptors		-2.0097	6.83098	3.88081	30284	190	70	3	4.28571	2.42076	1524|7852|58191	CX3CR1|CXCR4|CXCL16	-0.995329	0	29	0	0	-9.13593	22.3773
0	0	0	0	0	1	0	0	0	0	0	-4.35732	M195	M000001	1	0	Canonical Pathways	11	PID CMYB PATHWAY		-4.72764	10.9804	7.41188	30284	84	197	6	3.04569	1.22431	595|891|920|1278|2625|4069	CCND1|CCNB1|CD4|COL1A2|GATA3|LYZ	-3.08524	0	32	0	0	-8.9187	35.078
0	0	0	0	0	1	0	0	0	0	0	-4.06121	M65	M000001	1	0	Canonical Pathways	11	PID FRA PATHWAY		-4.06121	35.078	9.98339	30284	37	70	3	4.28571	2.42076	595|1278|4313	CCND1|COL1A2|MMP2	-2.68004	0	32	0	0	-8.9187	35.078
0	0	0	0	0	1	0	0	0	0	0	-3.23703	M167	M000001	1	0	Canonical Pathways	11	PID AP1 PATHWAY		-3.23703	18.5412	7.07211	30284	70	70	3	4.28571	2.42076	595|1278|5728	CCND1|COL1A2|PTEN	-2.0148	0	32	0	0	-8.9187	35.078
0	0	0	0	0	1	0	0	0	0	0	-8.48565	WP4146	M000001	1	0	WikiPathways	27	Macrophage markers		-8.48565	192.279	27.6243	30284	9	70	4	5.71429	2.77431	929|942|968|4069	CD14|CD86|CD68|LYZ	-6.36713	0	34	0	0	-8.59149	192.279
0	0	0	0	0	1	0	0	0	0	0	-5.00446	GO:0071222	M000001	1	0	GO Biological Processes	19	cellular response to lipopolysaccharide	19_GO:0044419 biological process involved in interspecies interaction between organisms	-5.00446	12.2442	7.90788	30284	212	70	6	8.57143	3.34594	929|942|968|1524|7431|84868	CD14|CD86|CD68|CX3CR1|VIM|HAVCR2	-3.45048	0	34	0	0	-8.59149	192.279
0	0	0	0	0	1	0	0	0	0	0	-4.84689	GO:0071219	M000001	1	0	GO Biological Processes	19	cellular response to molecule of bacterial origin	19_GO:0044419 biological process involved in interspecies interaction between organisms	-4.84689	11.4857	7.61582	30284	226	70	6	8.57143	3.34594	929|942|968|1524|7431|84868	CD14|CD86|CD68|CX3CR1|VIM|HAVCR2	-3.32742	0	34	0	0	-8.59149	192.279
0	0	0	0	0	1	0	0	0	0	0	-4.58054	GO:0071216	M000001	1	0	GO Biological Processes	19	cellular response to biotic stimulus	19_GO:0050896 response to stimulus	-4.58054	10.3007	7.1362	30284	252	70	6	8.57143	3.34594	929|942|968|1524|7431|84868	CD14|CD86|CD68|CX3CR1|VIM|HAVCR2	-3.09791	0	34	0	0	-8.59149	192.279
0	0	1	0	0	1	0	0	-3.18538	0	0	-2.51259	GO:0001952	M001001	2	0	GO Biological Processes	19	regulation of cell-matrix adhesion	19_GO:0050789 regulation of biological process	-5.76766	9.83846	8.01246	30284	125	197	8	4.06091	1.4063	1613|3728|5728|6385|6422|7070|7422|10631	DAPK3|JUP|PTEN|SDC4|SFRP1|THY1|VEGFA|POSTN	-3.93181	0	37	0	0	-8.51617	22.3773
0	0	0	0	0	1	0	0	0	0	0	-3.3714	GO:0051893	M000001	1	0	GO Biological Processes	19	regulation of focal adhesion assembly	19_GO:0050789 regulation of biological process	-5.45537	14.6406	8.76983	30284	63	197	6	3.04569	1.22431	1613|5728|6385|6422|7070|7422	DAPK3|PTEN|SDC4|SFRP1|THY1|VEGFA	-3.69399	0	37	0	0	-8.51617	22.3773
0	0	0	0	0	1	0	0	0	0	0	-3.3714	GO:0090109	M000001	1	0	GO Biological Processes	19	regulation of cell-substrate junction assembly	19_GO:0050789 regulation of biological process	-5.45537	14.6406	8.76983	30284	63	197	6	3.04569	1.22431	1613|5728|6385|6422|7070|7422	DAPK3|PTEN|SDC4|SFRP1|THY1|VEGFA	-3.69399	0	37	0	0	-8.51617	22.3773
0	0	0	0	0	1	0	0	0	0	0	-3.27392	GO:0150116	M000001	1	0	GO Biological Processes	19	regulation of cell-substrate junction organization	19_GO:0050789 regulation of biological process	-5.26002	13.564	8.39284	30284	68	197	6	3.04569	1.22431	1613|5728|6385|6422|7070|7422	DAPK3|PTEN|SDC4|SFRP1|THY1|VEGFA	-3.5354	0	37	0	0	-8.51617	22.3773
0	0	0	0	0	1	0	0	0	0	0	-3.89177	GO:0001933	M000001	1	0	GO Biological Processes	19	negative regulation of protein phosphorylation	19_GO:0048519 negative regulation of biological process	-3.89177	10.3007	6.50988	30284	210	70	5	7.14286	3.07818	857|5728|5788|6422|7070	CAV1|PTEN|PTPRC|SFRP1|THY1	-2.54181	0	37	0	0	-8.51617	22.3773
0	0	0	0	0	1	0	0	0	0	0	-3.74322	GO:0042326	M000001	1	0	GO Biological Processes	19	negative regulation of phosphorylation	19_GO:0048519 negative regulation of biological process	-3.74322	9.57143	6.22546	30284	226	70	5	7.14286	3.07818	857|5728|5788|6422|7070	CAV1|PTEN|PTPRC|SFRP1|THY1	-2.42141	0	37	0	0	-8.51617	22.3773
0	0	0	0	0	1	0	0	0	0	0	-3.47738	GO:2001238	M000001	1	0	GO Biological Processes	19	positive regulation of extrinsic apoptotic signaling pathway	19_GO:0048518 positive regulation of biological process	-3.47738	22.3773	7.84371	30284	58	70	3	4.28571	2.42076	857|5788|6422	CAV1|PTPRC|SFRP1	-2.20309	0	37	0	0	-8.51617	22.3773
0	0	0	0	0	1	0	0	0	0	0	-3.38777	GO:1901888	M000001	1	0	GO Biological Processes	19	regulation of cell junction assembly	19_GO:0050789 regulation of biological process	-3.38777	8.01164	5.57037	30284	270	70	5	7.14286	3.07818	857|5728|6422|6591|7070	CAV1|PTEN|SFRP1|SNAI2|THY1	-2.13195	0	37	0	0	-8.51617	22.3773
0	0	0	0	0	1	0	0	0	0	0	-3.32158	GO:0045667	M000001	1	0	GO Biological Processes	19	regulation of osteoblast differentiation	19_GO:0032502 developmental process	-3.32158	11.093	6.08336	30284	156	70	4	5.71429	2.77431	5728|6422|6591|8626	PTEN|SFRP1|SNAI2|TP63	-2.08149	0	37	0	0	-8.51617	22.3773
0	0	0	0	0	1	0	0	0	0	0	-2.17672	GO:0044089	M000001	1	0	GO Biological Processes	19	positive regulation of cellular component biogenesis	19_GO:0048518 positive regulation of biological process	-3.24714	3.3027	4.25219	30284	512	197	11	5.58376	1.63589	857|2017|2316|5290|6385|6422|7037|7070|7422|7453|54443	CAV1|CTTN|FLNA|PIK3CA|SDC4|SFRP1|TFRC|THY1|VEGFA|WARS1|ANLN	-1.82752	0	37	0	0	-8.51617	22.3773
0	0	0	0	0	1	0	0	0	0	0	-2.64761	GO:1901890	M000001	1	0	GO Biological Processes	19	positive regulation of cell junction assembly	19_GO:0048518 positive regulation of biological process	-3.07271	6.86276	5.02982	30284	112	197	5	2.53807	1.12056	857|6385|6422|7070|7422	CAV1|SDC4|SFRP1|THY1|VEGFA	-1.67817	0	37	0	0	-8.51617	22.3773
0	0	0	0	0	1	0	0	0	0	0	-3.04883	GO:0031400	M000001	1	0	GO Biological Processes	19	negative regulation of protein modification process	19_GO:0048519 negative regulation of biological process	-3.04883	6.73876	4.97534	30284	321	70	5	7.14286	3.07818	857|5728|5788|6422|7070	CAV1|PTEN|PTPRC|SFRP1|THY1	-1.86306	0	37	0	0	-8.51617	22.3773
0	0	0	0	0	1	0	0	0	0	0	-2.81011	GO:1902532	M000001	1	0	GO Biological Processes	19	negative regulation of intracellular signal transduction	19_GO:0048519 negative regulation of biological process	-2.81011	4.11467	4.11748	30284	736	70	7	10	3.58569	857|960|5728|5788|6422|6591|8626	CAV1|CD44|PTEN|PTPRC|SFRP1|SNAI2|TP63	-1.67041	0	37	0	0	-8.51617	22.3773
0	0	0	0	0	1	0	0	0	0	0	-2.4097	GO:0006469	M000001	1	0	GO Biological Processes	19	negative regulation of protein kinase activity	19_GO:0048519 negative regulation of biological process	-2.69843	5.65169	4.3994	30284	136	197	5	2.53807	1.12056	5728|5788|7070|7453|10221	PTEN|PTPRC|THY1|WARS1|TRIB1	-1.36351	0	37	0	0	-8.51617	22.3773
0	0	0	0	0	1	0	0	0	0	0	-2.34039	GO:0033673	M000001	1	0	GO Biological Processes	19	negative regulation of kinase activity	19_GO:0048519 negative regulation of biological process	-2.59057	5.3377	4.22195	30284	144	197	5	2.53807	1.12056	5728|5788|7070|7453|10221	PTEN|PTPRC|THY1|WARS1|TRIB1	-1.26732	0	37	0	0	-8.51617	22.3773
0	0	0	0	0	1	0	0	0	0	0	-2.16243	GO:0051348	M000001	1	0	GO Biological Processes	19	negative regulation of transferase activity	19_GO:0065007 biological regulation	-2.31639	4.60257	3.77753	30284	167	197	5	2.53807	1.12056	5728|5788|7070|7453|10221	PTEN|PTPRC|THY1|WARS1|TRIB1	-1.02102	0	37	0	0	-8.51617	22.3773
0	0	1	0	0	1	0	0	-4.26222	0	0	-6.00358	GO:0045596	M001001	2	0	GO Biological Processes	19	negative regulation of cell differentiation	19_GO:0032502 developmental process	-8.45118	4.57641	7.96473	30284	739	197	22	11.1675	2.24404	595|714|857|999|1289|1956|2064|2625|4320|5468|5728|5764|5914|6422|6591|6659|7070|7422|8626|10221|10875|54855	CCND1|C1QC|CAV1|CDH1|COL5A1|EGFR|ERBB2|GATA3|MMP11|PPARG|PTEN|PTN|RARA|SFRP1|SNAI2|SOX4|THY1|VEGFA|TP63|TRIB1|FGL2|TENT5C	-6.12067	0	38	1	1	-8.45118	7.95134
0	0	1	1	0	1	0	0	-2.57913	-2.76667	0	-4.22386	GO:0048732	M001101	3	0	GO Biological Processes	19	gland development	19_GO:0032502 developmental process	-8.44554	6.10593	8.60844	30284	428	197	17	8.62944	2.00061	220|367|595|857|999|1956|2194|2296|2625|4313|5290|5914|6422|6790|7298|7422|8626	ALDH1A3|AR|CCND1|CAV1|CDH1|EGFR|FASN|FOXC1|GATA3|MMP2|PIK3CA|RARA|SFRP1|AURKA|TYMS|VEGFA|TP63	-6.11989	0	38	0	0	-8.45118	7.95134
0	0	0	1	0	1	0	0	0	-2.02969	0	-5.3281	GO:0050678	M000101	2	0	GO Biological Processes	19	regulation of epithelial cell proliferation	19_GO:0050789 regulation of biological process	-7.88527	6.01373	8.2606	30284	409	197	16	8.12183	1.94626	367|595|857|1001|1956|2064|2625|4070|5468|5764|6387|6422|6591|6678|7422|8626	AR|CCND1|CAV1|CDH3|EGFR|ERBB2|GATA3|TACSTD2|PPARG|PTN|CXCL12|SFRP1|SNAI2|SPARC|VEGFA|TP63	-5.69214	0	38	0	0	-8.45118	7.95134
0	0	1	0	0	1	0	0	-2.56337	0	0	-3.60505	GO:0008283	M001001	2	0	GO Biological Processes	19	cell population proliferation	19_GO:0009987 cellular process	-6.5682	4.06796	6.73222	30284	718	197	19	9.64467	2.10323	367|595|857|928|1281|1291|1956|2064|2296|2625|5788|6591|6659|7422|8626|9833|9839|10403|57162	AR|CCND1|CAV1|CD9|COL3A1|COL6A1|EGFR|ERBB2|FOXC1|GATA3|PTPRC|SNAI2|SOX4|VEGFA|TP63|MELK|ZEB2|NDC80|PELI1	-4.60006	0	38	0	0	-8.45118	7.95134
0	0	0	0	0	1	0	0	0	0	0	-3.81601	GO:0050679	M000001	1	0	GO Biological Processes	19	positive regulation of epithelial cell proliferation	19_GO:0048518 positive regulation of biological process	-5.74147	7.05165	7.25616	30284	218	197	10	5.07614	1.56394	367|595|1001|1956|2064|5764|6387|6422|7422|8626	AR|CCND1|CDH3|EGFR|ERBB2|PTN|CXCL12|SFRP1|VEGFA|TP63	-3.91795	0	38	0	0	-8.45118	7.95134
0	0	1	0	0	1	0	0	-2.77142	0	0	-3.14366	GO:0030856	M001001	2	0	GO Biological Processes	19	regulation of epithelial cell differentiation	19_GO:0032502 developmental process	-5.64753	7.95134	7.44099	30284	174	197	9	4.56853	1.48765	360|595|857|2296|2625|6424|7422|8626|100133941	AQP3|CCND1|CAV1|FOXC1|GATA3|SFRP4|VEGFA|TP63|CD24	-3.84331	0	38	0	0	-8.45118	7.95134
0	0	0	1	0	0	0	0	0	-4.24005	0	0	R-HSA-9725554	M000100	1	0	Reactome Gene Sets	6	Differentiation of Keratinocytes in Interfollicular Epidermis in Mammalian Skin		-8.41277	29.0833	13.8309	30284	37	197	7	3.5533	1.31894	360|3655|3852|3858|3861|3880|7037	AQP3|ITGA6|KRT5|KRT10|KRT14|KRT19|TFRC	-6.09666	0	39	1	1	-8.41277	29.0833
0	0	0	1	0	1	0	0	0	-3.29113	0	-3.11613	R-HSA-9734767	M000101	2	0	Reactome Gene Sets	6	Developmental Cell Lineages		-7.39952	15.9715	10.6439	30284	77	197	8	4.06091	1.4063	360|3655|3852|3858|3861|3880|7037|7852	AQP3|ITGA6|KRT5|KRT10|KRT14|KRT19|TFRC|CXCR4	-5.26884	0	39	0	0	-8.41277	29.0833
0	0	0	1	0	1	0	0	0	-2.69295	0	-4.98378	R-HSA-1500931	M000101	2	0	Reactome Gene Sets	6	Cell-Cell communication		-5.79398	9.9178	8.05186	30284	124	197	8	4.06091	1.4063	999|1001|3655|3728|3852|3861|5290|9839	CDH1|CDH3|ITGA6|JUP|KRT5|KRT14|PIK3CA|ZEB2	-3.94384	0	39	0	0	-8.41277	29.0833
0	0	0	1	0	1	0	0	0	-2.98626	0	-4.09555	R-HSA-446728	M000101	2	0	Reactome Gene Sets	6	Cell junction organization		-5.42978	10.9804	8.0076	30284	98	197	7	3.5533	1.31894	999|1001|3655|3728|3852|3861|9839	CDH1|CDH3|ITGA6|JUP|KRT5|KRT14|ZEB2	-3.67752	0	39	0	0	-8.41277	29.0833
0	0	0	1	0	0	0	0	0	-2.13093	0	0	GO:0071466	M000100	1	0	GO Biological Processes	19	cellular response to xenobiotic stimulus	19_GO:0050896 response to stimulus	-2.72331	4.68201	4.19538	30284	197	197	6	3.04569	1.22431	9|1645|1956|6097|7037|7852	NAT1|AKR1C1|EGFR|RORC|TFRC|CXCR4	-1.38194	0	40	0	0	-8.3111	11.7274
0	0	0	1	0	0	0	0	0	-2.66341	0	0	GO:0006805	M000100	1	0	GO Biological Processes	19	xenobiotic metabolic process	19_GO:0050896 response to stimulus	-2.66341	11.7274	5.44248	30284	127	61	3	4.91803	2.76873	9|1645|6097	NAT1|AKR1C1|RORC	-1.54787	0	40	0	0	-8.3111	11.7274
0	0	0	0	0	1	0	0	0	0	0	-8.28602	GO:0050778	M000001	1	0	GO Biological Processes	19	positive regulation of immune response	19_GO:0002376 immune system process	-8.28602	8.22247	9.19629	30284	684	70	13	18.5714	4.64796	712|714|857|920|929|942|2207|4332|5290|5788|7070|84868|92610	C1QA|C1QC|CAV1|CD4|CD14|CD86|FCER1G|MNDA|PIK3CA|PTPRC|THY1|HAVCR2|TIFA	-6.1851	0	41	1	1	-8.28602	17.7793
0	0	0	0	0	1	0	0	0	0	0	-7.5993	GO:0002764	M000001	1	0	GO Biological Processes	19	immune response-regulating signaling pathway	19_GO:0002376 immune system process	-7.5993	10.9526	9.58351	30284	395	70	10	14.2857	4.18243	929|2205|2207|2214|4332|5290|5788|7070|84868|92610	CD14|FCER1A|FCER1G|FCGR3A|MNDA|PIK3CA|PTPRC|THY1|HAVCR2|TIFA	-5.60979	0	41	0	0	-8.28602	17.7793
0	0	0	0	0	1	0	0	0	0	0	-7.58898	GO:0002253	M000001	1	0	GO Biological Processes	19	activation of immune response	19_GO:0002376 immune system process	-7.58898	10.925	9.56913	30284	396	70	10	14.2857	4.18243	712|714|929|2207|4332|5290|5788|7070|84868|92610	C1QA|C1QC|CD14|FCER1G|MNDA|PIK3CA|PTPRC|THY1|HAVCR2|TIFA	-5.60794	0	41	0	0	-8.28602	17.7793
0	0	0	0	0	1	0	0	0	0	0	-6.48644	GO:0002768	M000001	1	0	GO Biological Processes	19	immune response-regulating cell surface receptor signaling pathway	19_GO:0002376 immune system process	-6.48644	12.1015	9.07952	30284	286	70	8	11.4286	3.80272	929|2205|2207|2214|4332|5290|5788|7070	CD14|FCER1A|FCER1G|FCGR3A|MNDA|PIK3CA|PTPRC|THY1	-4.67489	0	41	0	0	-8.28602	17.7793
0	0	0	0	0	1	0	0	0	0	0	-6.01837	GO:0002757	M000001	1	0	GO Biological Processes	19	immune response-activating signaling pathway	19_GO:0002376 immune system process	-6.01837	10.488	8.34155	30284	330	70	8	11.4286	3.80272	929|2207|4332|5290|5788|7070|84868|92610	CD14|FCER1G|MNDA|PIK3CA|PTPRC|THY1|HAVCR2|TIFA	-4.28992	0	41	0	0	-8.28602	17.7793
0	0	0	0	0	1	0	0	0	0	0	-4.59022	GO:0002429	M000001	1	0	GO Biological Processes	19	immune response-activating cell surface receptor signaling pathway	19_GO:0002376 immune system process	-4.59022	10.3417	7.15334	30284	251	70	6	8.57143	3.34594	929|2207|4332|5290|5788|7070	CD14|FCER1G|MNDA|PIK3CA|PTPRC|THY1	-3.10342	0	41	0	0	-8.28602	17.7793
0	0	0	0	0	1	0	0	0	0	0	-3.53278	hsa05132	M000001	1	0	KEGG Pathway	24	Salmonella infection		-3.53278	8.6181	5.83349	30284	251	70	5	7.14286	3.07818	929|2316|2597|5290|5788	CD14|FLNA|GAPDH|PIK3CA|PTPRC	-2.24852	0	41	0	0	-8.28602	17.7793
0	0	0	0	0	1	0	0	0	0	0	-3.29042	GO:0050851	M000001	1	0	GO Biological Processes	19	antigen receptor-mediated signaling pathway	19_GO:0002376 immune system process	-3.29042	10.8837	6.01451	30284	159	70	4	5.71429	2.77431	4332|5290|5788|7070	MNDA|PIK3CA|PTPRC|THY1	-2.05663	0	41	0	0	-8.28602	17.7793
0	0	0	0	0	1	0	0	0	0	0	-3.18372	GO:0050854	M000001	1	0	GO Biological Processes	19	regulation of antigen receptor-mediated signaling pathway	19_GO:0002376 immune system process	-3.18372	17.7793	6.90869	30284	73	70	3	4.28571	2.42076	5788|7070|9404	PTPRC|THY1|LPXN	-1.97127	0	41	0	0	-8.28602	17.7793
0	0	0	0	0	1	0	0	0	0	0	-2.62577	GO:0050852	M000001	1	0	GO Biological Processes	19	T cell receptor signaling pathway	19_GO:0002376 immune system process	-3.03811	6.74236	4.97048	30284	114	197	5	2.53807	1.12056	2625|5290|5788|7070|25800	GATA3|PIK3CA|PTPRC|THY1|SLC39A6	-1.64919	0	41	0	0	-8.28602	17.7793
0	0	0	0	0	1	0	0	0	0	0	-2.42772	GO:0051282	M000001	1	0	GO Biological Processes	19	regulation of sequestering of calcium ion	19_GO:0042592 homeostatic process	-2.42772	9.68571	4.85019	30284	134	70	3	4.28571	2.42076	2316|5788|7070	FLNA|PTPRC|THY1	-1.35546	0	41	0	0	-8.28602	17.7793
0	0	1	0	0	1	0	0	-3.89627	0	0	-3.39663	GO:0043085	M001001	2	0	GO Biological Processes	19	positive regulation of catalytic activity	19_GO:0065007 biological regulation	-7.96786	5.00136	7.90094	30284	584	197	19	9.64467	2.10323	595|920|991|1001|1956|2064|2264|3655|5728|5788|6279|6422|7070|8754|9618|11065|51520|56892|100133941	CCND1|CD4|CDC20|CDH3|EGFR|ERBB2|FGFR4|ITGA6|PTEN|PTPRC|S100A8|SFRP1|THY1|ADAM9|TRAF4|UBE2C|LARS1|TCIM|CD24	-5.74866	0	43	0	0	-8.2084	7.08414
0	0	1	0	0	1	0	0	-2.98908	0	0	-2.67309	GO:0031401	M001001	2	0	GO Biological Processes	19	positive regulation of protein modification process	19_GO:0048518 positive regulation of biological process	-7.33186	4.82067	7.47804	30284	574	197	18	9.13706	2.05288	595|857|920|991|1956|2064|5175|5728|5788|6659|7037|7422|8754|9618|11065|56892|57162|100133941	CCND1|CAV1|CD4|CDC20|EGFR|ERBB2|PECAM1|PTEN|PTPRC|SOX4|TFRC|VEGFA|ADAM9|TRAF4|UBE2C|TCIM|PELI1|CD24	-5.21768	0	43	0	0	-8.2084	7.08414
0	0	1	0	0	1	0	0	-2.26218	0	0	-2.48178	GO:0051347	M001001	2	0	GO Biological Processes	19	positive regulation of transferase activity	19_GO:0065007 biological regulation	-6.73841	6.98754	7.90657	30284	264	197	12	6.09137	1.70403	595|920|991|1956|2064|5728|5788|8754|9618|11065|56892|100133941	CCND1|CD4|CDC20|EGFR|ERBB2|PTEN|PTPRC|ADAM9|TRAF4|UBE2C|TCIM|CD24	-4.73267	0	43	0	0	-8.2084	7.08414
0	0	0	0	0	1	0	0	0	0	0	-2.4646	GO:0042327	M000001	1	0	GO Biological Processes	19	positive regulation of phosphorylation	19_GO:0048518 positive regulation of biological process	-6.68932	5.27663	7.28678	30284	437	197	15	7.61421	1.88965	367|595|857|920|1956|2064|3655|5175|5788|7037|7422|8754|9618|56892|100133941	AR|CCND1|CAV1|CD4|EGFR|ERBB2|ITGA6|PECAM1|PTPRC|TFRC|VEGFA|ADAM9|TRAF4|TCIM|CD24	-4.70389	0	43	0	0	-8.2084	7.08414
0	0	1	0	0	1	0	0	-4.4467	0	0	-3.14414	GO:0043410	M001001	2	0	GO Biological Processes	19	positive regulation of MAPK cascade	19_GO:0048518 positive regulation of biological process	-6.359	4.96959	6.97258	30284	464	197	15	7.61421	1.88965	59|367|920|960|1824|1880|1956|2064|2264|5788|7422|8754|9618|84868|100133941	ACTA2|AR|CD4|CD44|DSC2|GPR183|EGFR|ERBB2|FGFR4|PTPRC|VEGFA|ADAM9|TRAF4|HAVCR2|CD24	-4.43128	0	43	0	0	-8.2084	7.08414
0	0	0	0	0	1	0	0	0	0	0	-2.2446	GO:0010562	M000001	1	0	GO Biological Processes	19	positive regulation of phosphorus metabolic process	19_GO:0048518 positive regulation of biological process	-6.02952	4.67726	6.66113	30284	493	197	15	7.61421	1.88965	367|595|857|920|1956|2064|3655|5175|5788|7037|7422|8754|9618|56892|100133941	AR|CCND1|CAV1|CD4|EGFR|ERBB2|ITGA6|PECAM1|PTPRC|TFRC|VEGFA|ADAM9|TRAF4|TCIM|CD24	-4.13879	0	43	0	0	-8.2084	7.08414
0	0	0	0	0	1	0	0	0	0	0	-2.2446	GO:0045937	M000001	1	0	GO Biological Processes	19	positive regulation of phosphate metabolic process	19_GO:0048518 positive regulation of biological process	-6.02952	4.67726	6.66113	30284	493	197	15	7.61421	1.88965	367|595|857|920|1956|2064|3655|5175|5788|7037|7422|8754|9618|56892|100133941	AR|CCND1|CAV1|CD4|EGFR|ERBB2|ITGA6|PECAM1|PTPRC|TFRC|VEGFA|ADAM9|TRAF4|TCIM|CD24	-4.13879	0	43	0	0	-8.2084	7.08414
0	0	1	0	0	1	0	0	-3.60199	0	0	-3.07525	GO:0043408	M001001	2	0	GO Biological Processes	19	regulation of MAPK cascade	19_GO:0050896 response to stimulus	-5.75123	3.94764	6.20497	30284	662	197	17	8.62944	2.00061	59|367|857|920|960|1824|1880|1956|2064|2264|5468|5788|7422|8754|9618|84868|100133941	ACTA2|AR|CAV1|CD4|CD44|DSC2|GPR183|EGFR|ERBB2|FGFR4|PPARG|PTPRC|VEGFA|ADAM9|TRAF4|HAVCR2|CD24	-3.92004	0	43	0	0	-8.2084	7.08414
0	0	0	0	0	1	0	0	0	0	0	-2.56489	GO:0001934	M000001	1	0	GO Biological Processes	19	positive regulation of protein phosphorylation	19_GO:0048518 positive regulation of biological process	-5.44367	4.82714	6.34454	30284	414	197	13	6.59898	1.76881	595|857|920|1956|2064|5175|5788|7037|7422|8754|9618|56892|100133941	CCND1|CAV1|CD4|EGFR|ERBB2|PECAM1|PTPRC|TFRC|VEGFA|ADAM9|TRAF4|TCIM|CD24	-3.68882	0	43	0	0	-8.2084	7.08414
0	0	1	0	0	1	0	0	-3.82815	0	0	-5.17369	GO:0070374	M001001	2	0	GO Biological Processes	19	positive regulation of ERK1 and ERK2 cascade	19_GO:0048518 positive regulation of biological process	-5.18934	6.98754	6.83978	30284	198	197	9	4.56853	1.48765	59|920|960|1880|1956|2264|5788|7422|84868	ACTA2|CD4|CD44|GPR183|EGFR|FGFR4|PTPRC|VEGFA|HAVCR2	-3.47998	0	43	0	0	-8.2084	7.08414
0	0	1	0	0	1	0	0	-3.16672	0	0	-4.19185	GO:0070372	M001001	2	0	GO Biological Processes	19	regulation of ERK1 and ERK2 cascade	19_GO:0050896 response to stimulus	-4.57858	5.19344	5.86659	30284	296	197	10	5.07614	1.56394	59|920|960|1880|1956|2064|2264|5788|7422|84868	ACTA2|CD4|CD44|GPR183|EGFR|ERBB2|FGFR4|PTPRC|VEGFA|HAVCR2	-2.95189	0	43	0	0	-8.2084	7.08414
0	0	0	0	0	1	0	0	0	0	0	-4.29458	GO:0044319	M000001	1	0	GO Biological Processes	19	wound healing, spreading of cells	19_GO:0032502 developmental process	-4.29458	41.8673	10.9576	30284	31	70	3	4.28571	2.42076	960|1289|2316	CD44|COL5A1|FLNA	-2.86349	0	44	0	0	-8.15119	41.8673
0	0	0	0	0	1	0	0	0	0	0	-4.29458	GO:0090505	M000001	1	0	GO Biological Processes	19	epiboly involved in wound healing	19_GO:0032502 developmental process	-4.29458	41.8673	10.9576	30284	31	70	3	4.28571	2.42076	960|1289|2316	CD44|COL5A1|FLNA	-2.86349	0	44	0	0	-8.15119	41.8673
0	0	0	0	0	1	0	0	0	0	0	-4.25255	GO:0090504	M000001	1	0	GO Biological Processes	19	epiboly	19_GO:0032502 developmental process	-4.25255	40.5589	10.7767	30284	32	70	3	4.28571	2.42076	960|1289|2316	CD44|COL5A1|FLNA	-2.82999	0	44	0	0	-8.15119	41.8673
0	0	0	0	0	1	0	0	0	0	0	-3.56933	GO:0002011	M000001	1	0	GO Biological Processes	19	morphogenesis of an epithelial sheet	19_GO:0032502 developmental process	-3.56933	24.0349	8.15472	30284	54	70	3	4.28571	2.42076	960|1289|2316	CD44|COL5A1|FLNA	-2.27933	0	44	0	0	-8.15119	41.8673
0	0	0	0	0	1	0	0	0	0	0	-4.59833	GO:2001235	M000001	1	0	GO Biological Processes	19	positive regulation of apoptotic signaling pathway	19_GO:0048518 positive regulation of biological process	-5.19885	8.25374	7.18228	30284	149	197	8	4.06091	1.4063	857|4313|5468|5788|6279|6422|8626|81618	CAV1|MMP2|PPARG|PTPRC|S100A8|SFRP1|TP63|ITM2C	-3.48715	0	45	0	0	-8.14919	8.25374
0	0	0	1	1	0	0	0	0	-4.2786	-5.54586	0	M5924	M000110	2	0	Hallmark Gene Sets	23	HALLMARK MTORC1 SIGNALING		-8.06423	9.22355	9.44169	30284	200	197	12	6.09137	1.70403	928|1491|2597|6241|6319|6713|6790|7037|7277|7453|7852|10875	CD9|CTH|GAPDH|RRM2|SCD|SQLE|AURKA|TFRC|TUBA4A|WARS1|CXCR4|FGL2	-5.82177	0	46	1	1	-8.06423	9.22355
0	0	0	0	1	0	0	0	0	0	-8.05553	0	R-HSA-174143	M000010	1	0	Reactome Gene Sets	6	APC/C-mediated degradation of cell cycle proteins		-8.05553	70.6909	18.5639	30284	63	34	5	14.7059	6.07387	891|991|6790|9232|11065	CCNB1|CDC20|AURKA|PTTG1|UBE2C	-6.01028	0	47	1	1	-8.05553	127.244
0	0	0	0	1	0	0	0	0	0	-8.05553	0	R-HSA-453276	M000010	1	0	Reactome Gene Sets	6	Regulation of mitotic cell cycle		-8.05553	70.6909	18.5639	30284	63	34	5	14.7059	6.07387	891|991|6790|9232|11065	CCNB1|CDC20|AURKA|PTTG1|UBE2C	-6.01028	0	47	0	0	-8.05553	127.244
0	0	0	0	1	0	0	0	0	0	-6.46226	0	R-HSA-174178	M000010	1	0	Reactome Gene Sets	6	APC/C:Cdh1 mediated degradation of Cdc20 and other APC/C:Cdh1 targeted proteins in late mitosis/early G1		-6.46226	68.5158	16.3362	30284	52	34	4	11.7647	5.52551	991|6790|9232|11065	CDC20|AURKA|PTTG1|UBE2C	-4.65804	0	47	0	0	-8.05553	127.244
0	0	0	0	1	0	0	0	0	0	-6.39545	0	R-HSA-176409	M000010	1	0	Reactome Gene Sets	6	APC/C:Cdc20 mediated degradation of mitotic proteins		-6.39545	65.9782	16.0222	30284	54	34	4	11.7647	5.52551	891|991|9232|11065	CCNB1|CDC20|PTTG1|UBE2C	-4.60752	0	47	0	0	-8.05553	127.244
0	0	0	0	1	0	0	0	0	0	-6.363	0	R-HSA-176814	M000010	1	0	Reactome Gene Sets	6	Activation of APC/C and APC/C:Cdc20 mediated degradation of mitotic proteins		-6.363	64.7786	15.8716	30284	55	34	4	11.7647	5.52551	891|991|9232|11065	CCNB1|CDC20|PTTG1|UBE2C	-4.58003	0	47	0	0	-8.05553	127.244
0	0	0	0	1	0	0	0	0	0	-5.77061	0	GO:1901970	M000010	1	0	GO Biological Processes	19	positive regulation of mitotic sister chromatid separation	19_GO:0048518 positive regulation of biological process	-5.77061	127.244	19.4017	30284	21	34	3	8.82353	4.86433	332|991|11065	BIRC5|CDC20|UBE2C	-4.08289	0	47	0	0	-8.05553	127.244
0	0	0	0	1	0	0	0	0	0	-5.77061	0	R-HSA-174048	M000010	1	0	Reactome Gene Sets	6	APC/C:Cdc20 mediated degradation of Cyclin B		-5.77061	127.244	19.4017	30284	21	34	3	8.82353	4.86433	891|991|11065	CCNB1|CDC20|UBE2C	-4.08289	0	47	0	0	-8.05553	127.244
0	0	1	0	1	1	0	0	-3.11476	0	-3.50071	-2.08865	GO:0030162	M001011	3	0	GO Biological Processes	19	regulation of proteolysis	19_GO:0050789 regulation of biological process	-5.56332	4.28604	6.2229	30284	538	197	15	7.61421	1.88965	332|857|960|991|2264|2597|4193|5272|5728|6279|6790|7076|7422|8754|10221	BIRC5|CAV1|CD44|CDC20|FGFR4|GAPDH|MDM2|SERPINB9|PTEN|S100A8|AURKA|TIMP1|VEGFA|ADAM9|TRIB1	-3.77479	0	47	0	0	-8.05553	127.244
0	0	0	0	1	0	0	0	0	0	-5.20264	0	GO:1905820	M000010	1	0	GO Biological Processes	19	positive regulation of chromosome separation	19_GO:0048518 positive regulation of biological process	-5.20264	83.5037	15.6548	30284	32	34	3	8.82353	4.86433	332|991|11065	BIRC5|CDC20|UBE2C	-3.61471	0	47	0	0	-8.05553	127.244
0	0	0	0	1	0	0	0	0	0	-5.12229	0	WP5426	M000010	1	0	WikiPathways	27	HDAC6 interactions in the central nervous system		-5.12229	31.8109	10.9519	30284	112	34	4	11.7647	5.52551	332|991|6790|7277	BIRC5|CDC20|AURKA|TUBA4A	-3.55251	0	47	0	0	-8.05553	127.244
0	0	0	0	1	0	0	0	0	0	-4.75179	0	hsa04114	M000010	1	0	KEGG Pathway	24	Oocyte meiosis		-4.75179	25.6318	9.75826	30284	139	34	4	11.7647	5.52551	891|991|6790|9232	CCNB1|CDC20|AURKA|PTTG1	-3.24348	0	47	0	0	-8.05553	127.244
0	0	0	0	1	0	0	0	0	0	-4.69321	0	GO:0045840	M000010	1	0	GO Biological Processes	19	positive regulation of mitotic nuclear division	19_GO:0048518 positive regulation of biological process	-4.69321	56.8536	12.8471	30284	47	34	3	8.82353	4.86433	991|6790|11065	CDC20|AURKA|UBE2C	-3.19291	0	47	0	0	-8.05553	127.244
0	0	0	0	1	0	0	0	0	0	-4.69321	0	R-HSA-174154	M000010	1	0	Reactome Gene Sets	6	APC/C:Cdc20 mediated degradation of Securin		-4.69321	56.8536	12.8471	30284	47	34	3	8.82353	4.86433	991|9232|11065	CDC20|PTTG1|UBE2C	-3.19291	0	47	0	0	-8.05553	127.244
0	0	0	0	1	0	0	0	0	0	-4.58587	0	GO:0090307	M000010	1	0	GO Biological Processes	19	mitotic spindle assembly	19_GO:0009987 cellular process	-4.58587	52.3945	12.3151	30284	51	34	3	8.82353	4.86433	332|991|4605	BIRC5|CDC20|MYBL2	-3.09977	0	47	0	0	-8.05553	127.244
0	0	0	0	1	0	0	0	0	0	-4.44018	0	R-HSA-176408	M000010	1	0	Reactome Gene Sets	6	Regulation of APC/C activators between G1/S and early anaphase		-4.44018	46.8793	11.6234	30284	57	34	3	8.82353	4.86433	891|991|11065	CCNB1|CDC20|UBE2C	-2.9818	0	47	0	0	-8.05553	127.244
0	0	0	0	1	0	0	0	0	0	-4.3304	0	GO:0051785	M000010	1	0	GO Biological Processes	19	positive regulation of nuclear division	19_GO:0048518 positive regulation of biological process	-4.3304	43.0987	11.1245	30284	62	34	3	8.82353	4.86433	991|6790|11065	CDC20|AURKA|UBE2C	-2.88935	0	47	0	0	-8.05553	127.244
0	0	0	0	1	0	0	0	0	0	-3.9834	0	GO:0032436	M000010	1	0	GO Biological Processes	19	positive regulation of proteasomal ubiquitin-dependent protein catabolic process	19_GO:0048518 positive regulation of biological process	-3.9834	32.9891	9.66487	30284	81	34	3	8.82353	4.86433	991|4193|6790	CDC20|MDM2|AURKA	-2.61785	0	47	0	0	-8.05553	127.244
0	0	1	0	1	0	0	0	-2.13358	0	-2.36271	0	GO:0045862	M001010	2	0	GO Biological Processes	19	positive regulation of proteolysis	19_GO:0048518 positive regulation of biological process	-3.84956	4.70589	5.1668	30284	294	197	9	4.56853	1.48765	857|991|2264|4193|5728|6279|6790|8754|10221	CAV1|CDC20|FGFR4|MDM2|PTEN|S100A8|AURKA|ADAM9|TRIB1	-2.34418	0	47	0	0	-8.05553	127.244
0	0	0	0	1	0	0	0	0	0	-2.07147	0	GO:0042176	M000010	1	0	GO Biological Processes	19	regulation of protein catabolic process	19_GO:0050789 regulation of biological process	-3.72865	4.09936	4.88685	30284	375	197	10	5.07614	1.56394	857|991|999|1956|2316|4193|6790|7076|8754|10221	CAV1|CDC20|CDH1|EGFR|FLNA|MDM2|AURKA|TIMP1|ADAM9|TRIB1	-2.23692	0	47	0	0	-8.05553	127.244
0	0	0	0	1	0	0	0	0	0	-3.63739	0	GO:2000060	M000010	1	0	GO Biological Processes	19	positive regulation of ubiquitin-dependent protein catabolic process	19_GO:0048518 positive regulation of biological process	-3.63739	25.2087	8.37056	30284	106	34	3	8.82353	4.86433	991|4193|6790	CDC20|MDM2|AURKA	-2.33522	0	47	0	0	-8.05553	127.244
0	0	0	0	1	0	0	0	0	0	-3.53323	0	GO:1901800	M000010	1	0	GO Biological Processes	19	positive regulation of proteasomal protein catabolic process	19_GO:0048518 positive regulation of biological process	-3.53323	23.2358	8.00936	30284	115	34	3	8.82353	4.86433	991|4193|6790	CDC20|MDM2|AURKA	-2.24853	0	47	0	0	-8.05553	127.244
0	0	0	0	1	0	0	0	0	0	-3.30142	0	GO:1903052	M000010	1	0	GO Biological Processes	19	positive regulation of proteolysis involved in protein catabolic process	19_GO:0048518 positive regulation of biological process	-3.52852	6.68373	5.41504	30284	138	197	6	3.04569	1.22431	857|991|4193|5728|6790|10221	CAV1|CDC20|MDM2|PTEN|AURKA|TRIB1	-2.06948	0	47	0	0	-8.05553	127.244
0	0	0	0	1	0	0	0	0	0	-3.35778	0	GO:0032434	M000010	1	0	GO Biological Processes	19	regulation of proteasomal ubiquitin-dependent protein catabolic process	19_GO:0050789 regulation of biological process	-3.35778	20.2433	7.42822	30284	132	34	3	8.82353	4.86433	991|4193|6790	CDC20|MDM2|AURKA	-2.1101	0	47	0	0	-8.05553	127.244
0	0	0	0	1	0	0	0	0	0	-3.26526	0	hsa04120	M000010	1	0	KEGG Pathway	24	Ubiquitin mediated proteolysis		-3.26526	18.8177	7.13488	30284	142	34	3	8.82353	4.86433	991|4193|11065	CDC20|MDM2|UBE2C	-2.03729	0	47	0	0	-8.05553	127.244
0	0	0	0	1	0	0	0	0	0	-3.14063	0	GO:0043161	M000010	1	0	GO Biological Processes	19	proteasome-mediated ubiquitin-dependent protein catabolic process	19_GO:0009987 cellular process	-3.14063	9.76116	5.64561	30284	365	34	4	11.7647	5.52551	991|4193|6790|11065	CDC20|MDM2|AURKA|UBE2C	-1.93738	0	47	0	0	-8.05553	127.244
0	0	0	0	1	0	0	0	0	0	-3.02389	0	GO:2000058	M000010	1	0	GO Biological Processes	19	regulation of ubiquitin-dependent protein catabolic process	19_GO:0050789 regulation of biological process	-3.02389	15.5356	6.40918	30284	172	34	3	8.82353	4.86433	991|4193|6790	CDC20|MDM2|AURKA	-1.84263	0	47	0	0	-8.05553	127.244
0	0	0	0	1	0	0	0	0	0	-2.83561	0	GO:0061136	M000010	1	0	GO Biological Processes	19	regulation of proteasomal protein catabolic process	19_GO:0050789 regulation of biological process	-2.83561	13.3606	5.8798	30284	200	34	3	8.82353	4.86433	991|4193|6790	CDC20|MDM2|AURKA	-1.68925	0	47	0	0	-8.05553	127.244
0	0	0	0	1	0	0	0	0	0	-2.79073	0	GO:0010498	M000010	1	0	GO Biological Processes	19	proteasomal protein catabolic process	19_GO:0009987 cellular process	-2.79073	7.84763	4.92853	30284	454	34	4	11.7647	5.52551	991|4193|6790|11065	CDC20|MDM2|AURKA|UBE2C	-1.65353	0	47	0	0	-8.05553	127.244
0	0	0	0	1	0	0	0	0	0	-2.75167	0	GO:0045732	M000010	1	0	GO Biological Processes	19	positive regulation of protein catabolic process	19_GO:0048518 positive regulation of biological process	-2.75167	12.4865	5.65334	30284	214	34	3	8.82353	4.86433	991|4193|6790	CDC20|MDM2|AURKA	-1.62191	0	47	0	0	-8.05553	127.244
0	0	0	0	1	0	0	0	0	0	-2.61537	0	GO:1903050	M000010	1	0	GO Biological Processes	19	regulation of proteolysis involved in protein catabolic process	19_GO:0050789 regulation of biological process	-2.61537	11.1804	5.2973	30284	239	34	3	8.82353	4.86433	991|4193|6790	CDC20|MDM2|AURKA	-1.5083	0	47	0	0	-8.05553	127.244
0	0	0	0	1	0	0	0	0	0	-2.57992	0	GO:0000209	M000010	1	0	GO Biological Processes	19	protein polyubiquitination	19_GO:0009987 cellular process	-2.57992	10.8623	5.20697	30284	246	34	3	8.82353	4.86433	4193|11065|29089	MDM2|UBE2C|UBE2T	-1.47785	0	47	0	0	-8.05553	127.244
0	0	0	0	1	0	0	0	0	0	-2.50077	0	GO:0006511	M000010	1	0	GO Biological Processes	19	ubiquitin-dependent protein catabolic process	19_GO:0009987 cellular process	-2.50077	6.52532	4.36791	30284	546	34	4	11.7647	5.52551	991|4193|6790|11065	CDC20|MDM2|AURKA|UBE2C	-1.41455	0	47	0	0	-8.05553	127.244
0	0	0	0	1	0	0	0	0	0	-2.46979	0	GO:0019941	M000010	1	0	GO Biological Processes	19	modification-dependent protein catabolic process	19_GO:0009987 cellular process	-2.46979	6.39645	4.3096	30284	557	34	4	11.7647	5.52551	991|4193|6790|11065	CDC20|MDM2|AURKA|UBE2C	-1.38883	0	47	0	0	-8.05553	127.244
0	0	0	0	1	0	0	0	0	0	-2.45594	0	GO:0043632	M000010	1	0	GO Biological Processes	19	modification-dependent macromolecule catabolic process	19_GO:0009987 cellular process	-2.45594	6.33954	4.28361	30284	562	34	4	11.7647	5.52551	991|4193|6790|11065	CDC20|MDM2|AURKA|UBE2C	-1.37881	0	47	0	0	-8.05553	127.244
0	0	0	0	1	0	0	0	0	0	-2.38347	0	GO:0016567	M000010	1	0	GO Biological Processes	19	protein ubiquitination	19_GO:0009987 cellular process	-2.38347	6.04894	4.14851	30284	589	34	4	11.7647	5.52551	991|4193|11065|29089	CDC20|MDM2|UBE2C|UBE2T	-1.31655	0	47	0	0	-8.05553	127.244
0	0	0	0	1	0	0	0	0	0	-2.19589	0	GO:0051603	M000010	1	0	GO Biological Processes	19	proteolysis involved in protein catabolic process	19_GO:0009987 cellular process	-2.19589	5.34958	3.80525	30284	666	34	4	11.7647	5.52551	991|4193|6790|11065	CDC20|MDM2|AURKA|UBE2C	-1.1568	0	47	0	0	-8.05553	127.244
0	0	0	0	1	0	0	0	0	0	-2.19362	0	GO:0032446	M000010	1	0	GO Biological Processes	19	protein modification by small protein conjugation	19_GO:0009987 cellular process	-2.19362	5.34156	3.80115	30284	667	34	4	11.7647	5.52551	991|4193|11065|29089	CDC20|MDM2|UBE2C|UBE2T	-1.15478	0	47	0	0	-8.05553	127.244
0	0	0	0	0	1	0	0	0	0	0	-2.61985	GO:1902903	M000001	1	0	GO Biological Processes	19	regulation of supramolecular fiber organization	19_GO:0050789 regulation of biological process	-3.48852	3.82403	4.61233	30284	402	197	10	5.07614	1.56394	1291|1613|2017|2316|4070|5290|6385|6387|6422|6840	COL6A1|DAPK3|CTTN|FLNA|TACSTD2|PIK3CA|SDC4|CXCL12|SFRP1|SVIL	-2.03145	0	48	0	0	-8.05127	6.17994
0	0	0	0	0	1	0	0	0	0	0	-2.42994	GO:0110053	M000001	1	0	GO Biological Processes	19	regulation of actin filament organization	19_GO:0050789 regulation of biological process	-3.35371	4.50479	4.70702	30284	273	197	8	4.06091	1.4063	2017|2316|4070|5290|6385|6387|6422|6840	CTTN|FLNA|TACSTD2|PIK3CA|SDC4|CXCL12|SFRP1|SVIL	-1.91642	0	48	0	0	-8.05127	6.17994
0	0	0	0	0	1	0	0	0	0	0	-2.03681	GO:0032956	M000001	1	0	GO Biological Processes	19	regulation of actin cytoskeleton organization	19_GO:0050789 regulation of biological process	-3.25884	3.90829	4.45378	30284	354	197	9	4.56853	1.48765	1613|2017|2316|4070|5290|6385|6387|6422|6840	DAPK3|CTTN|FLNA|TACSTD2|PIK3CA|SDC4|CXCL12|SFRP1|SVIL	-1.83446	0	48	0	0	-8.05127	6.17994
0	0	1	0	1	0	0	0	-5.59147	0	-3.10686	0	GO:0007584	M001010	2	0	GO Biological Processes	19	response to nutrient	19_GO:0050896 response to stimulus	-8.02229	10.503	9.78291	30284	161	197	11	5.58376	1.63589	360|1277|1956|4193|5468|5914|6422|7037|7298|8644|10631	AQP3|COL1A1|EGFR|MDM2|PPARG|RARA|SFRP1|TFRC|TYMS|AKR1C3|POSTN	-5.79162	0	49	1	1	-8.02229	14.3001
0	0	1	0	0	0	0	0	-6.94499	0	0	0	GO:0033273	M001000	1	0	GO Biological Processes	19	response to vitamin	19_GO:0050896 response to stimulus	-7.01952	14.3001	9.99442	30284	86	197	8	4.06091	1.4063	360|1277|1956|4193|5914|6422|7298|10631	AQP3|COL1A1|EGFR|MDM2|RARA|SFRP1|TYMS|POSTN	-4.96493	0	49	0	0	-8.02229	14.3001
0	0	0	0	0	1	0	0	0	0	0	-2.7461	GO:1901654	M000001	1	0	GO Biological Processes	19	response to ketone	19_GO:0050896 response to stimulus	-5.65309	6.89354	7.14776	30284	223	197	10	5.07614	1.56394	367|857|1956|2706|5290|5788|6422|7298|8644|10631	AR|CAV1|EGFR|GJB2|PIK3CA|PTPRC|SFRP1|TYMS|AKR1C3|POSTN	-3.84595	0	49	0	0	-8.02229	14.3001
0	0	0	0	0	1	0	0	0	0	0	-2.36917	GO:0048545	M000001	1	0	GO Biological Processes	19	response to steroid hormone	19_GO:0050896 response to stimulus	-5.54521	5.95417	6.78754	30284	284	197	11	5.58376	1.63589	367|857|1277|1956|2706|4193|5290|5788|7298|8644|8754	AR|CAV1|COL1A1|EGFR|GJB2|MDM2|PIK3CA|PTPRC|TYMS|AKR1C3|ADAM9	-3.75947	0	49	0	0	-8.02229	14.3001
0	0	0	0	0	1	0	0	0	0	0	-4.06121	GO:0014002	M000001	1	0	GO Biological Processes	19	astrocyte development	19_GO:0032502 developmental process	-5.38991	20.7738	9.7385	30284	37	197	5	2.53807	1.12056	712|1956|6279|7431|9839	C1QA|EGFR|S100A8|VIM|ZEB2	-3.64277	0	51	0	0	-7.9002	20.7738
0	0	0	0	0	1	0	0	0	0	0	-3.27392	GO:0048708	M000001	1	0	GO Biological Processes	19	astrocyte differentiation	19_GO:0032502 developmental process	-4.08216	11.3034	6.8827	30284	68	197	5	2.53807	1.12056	712|1956|6279|7431|9839	C1QA|EGFR|S100A8|VIM|ZEB2	-2.55122	0	51	0	0	-7.9002	20.7738
0	0	1	0	0	0	0	0	-3.29087	0	0	0	GO:0002793	M001000	1	0	GO Biological Processes	19	positive regulation of peptide secretion	19_GO:0051179 localization	-3.29087	19.2687	7.22696	30284	115	41	3	7.31707	4.06702	1956|6279|6659	EGFR|S100A8|SOX4	-2.05663	0	51	0	0	-7.9002	20.7738
0	0	1	1	1	0	0	0	-2.84773	-2.21648	-2.11656	0	GO:0018193	M001110	3	0	GO Biological Processes	19	peptidyl-amino acid modification	19_GO:0009987 cellular process	-2.84773	8.18431	5.05609	30284	361	41	4	9.7561	4.63399	1956|2264|2597|6279	EGFR|FGFR4|GAPDH|S100A8	-1.69882	0	51	0	0	-7.9002	20.7738
0	0	1	0	0	0	0	0	-2.55735	0	0	0	GO:0002791	M001000	1	0	GO Biological Processes	19	regulation of peptide secretion	19_GO:0051179 localization	-2.55735	10.7048	5.15864	30284	207	41	3	7.31707	4.06702	1956|6279|6659	EGFR|S100A8|SOX4	-1.45987	0	51	0	0	-7.9002	20.7738
0	0	1	0	0	0	0	0	-2.54558	0	0	0	GO:0090087	M001000	1	0	GO Biological Processes	19	regulation of peptide transport	19_GO:0051179 localization	-2.54558	10.6024	5.12896	30284	209	41	3	7.31707	4.06702	1956|6279|6659	EGFR|S100A8|SOX4	-1.45118	0	51	0	0	-7.9002	20.7738
0	0	0	0	0	1	0	0	0	0	0	-4.99547	R-HSA-9009391	M000001	1	0	Reactome Gene Sets	6	Extra-nuclear estrogen signaling		-4.99547	29.8365	10.5806	30284	58	70	4	5.71429	2.77431	595|857|4313|5290	CCND1|CAV1|MMP2|PIK3CA	-3.44474	0	52	0	0	-7.88213	41.8673
0	0	0	0	0	1	0	0	0	0	0	-4.11751	R-HSA-8939211	M000001	1	0	Reactome Gene Sets	6	ESR-mediated signaling		-4.46717	6.54153	6.16733	30284	188	197	8	4.06091	1.4063	595|857|2625|4313|5290|6387|7033|51523	CCND1|CAV1|GATA3|MMP2|PIK3CA|CXCL12|TFF3|CXXC5	-2.86397	0	52	0	0	-7.88213	41.8673
0	0	0	0	0	1	0	0	0	0	0	-4.29458	M63	M000001	1	0	Canonical Pathways	11	PID AVB3 OPN PATHWAY		-4.29458	41.8673	10.9576	30284	31	70	3	4.28571	2.42076	960|4313|5290	CD44|MMP2|PIK3CA	-2.86349	0	52	0	0	-7.88213	41.8673
0	0	0	0	0	1	0	0	0	0	0	-3.48771	hsa05418	M000001	1	0	KEGG Pathway	24	Fluid shear stress and atherosclerosis		-3.48771	12.2732	6.45812	30284	141	70	4	5.71429	2.77431	857|4313|5175|5290	CAV1|MMP2|PECAM1|PIK3CA	-2.21214	0	52	0	0	-7.88213	41.8673
0	0	0	0	0	1	0	0	0	0	0	-2.53565	GO:0043523	M000001	1	0	GO Biological Processes	19	regulation of neuron apoptotic process	19_GO:0050789 regulation of biological process	-2.8346	4.21993	4.1782	30284	255	197	7	3.5533	1.31894	595|1524|2625|4313|4605|5290|7020	CCND1|CX3CR1|GATA3|MMP2|MYBL2|PIK3CA|TFAP2A	-1.47587	0	52	0	0	-7.88213	41.8673
0	0	0	0	0	1	0	0	0	0	0	-5.36349	M236	M000001	1	0	Canonical Pathways	11	PID DELTA NP63 PATHWAY		-7.65069	22.8953	12.1555	30284	47	197	7	3.5533	1.31894	1289|2194|3852|3861|4193|7153|8626	COL5A1|FASN|KRT5|KRT14|MDM2|TOP2A|TP63	-5.49465	0	54	1	1	-7.65069	22.8953
0	0	0	0	0	1	0	0	0	0	0	-7.58938	GO:0150146	M000001	1	0	GO Biological Processes	19	cell junction disassembly	19_GO:0009987 cellular process	-7.58938	123.608	22.0862	30284	14	70	4	5.71429	2.77431	712|714|1524|6591	C1QA|C1QC|CX3CR1|SNAI2	-5.60794	0	55	1	1	-7.58938	129.789
0	0	0	0	0	1	0	0	0	0	0	-5.85301	GO:0098883	M000001	1	0	GO Biological Processes	19	synapse pruning	19_GO:0009987 cellular process	-5.85301	129.789	19.6059	30284	10	70	3	4.28571	2.42076	712|714|1524	C1QA|C1QC|CX3CR1	-4.15175	0	55	0	0	-7.58938	129.789
0	0	0	0	0	1	0	0	0	0	0	-5.6486	WP3937	M000001	1	0	WikiPathways	27	Microglia pathogen phagocytosis pathway		-5.6486	43.2629	12.874	30284	40	70	4	5.71429	2.77431	712|714|2207|5290	C1QA|C1QC|FCER1G|PIK3CA	-3.98043	0	55	0	0	-7.58938	129.789
0	0	0	0	0	1	0	0	0	0	0	-4.48944	hsa04148	M000001	1	0	KEGG Pathway	24	Efferocytosis		-5.03205	7.83317	6.94604	30284	157	197	8	4.06091	1.4063	712|714|1524|5175|5468|8754|84868|100133941	C1QA|C1QC|CX3CR1|PECAM1|PPARG|ADAM9|HAVCR2|CD24	-3.34765	0	55	0	0	-7.58938	129.789
0	0	0	1	0	1	0	0	0	-2.50902	0	-3.45301	hsa04936	M000101	2	0	KEGG Pathway	24	Alcoholic liver disease		-4.33815	7.47279	6.30005	30284	144	197	7	3.5533	1.31894	125|595|712|714|929|2194|6319	ADH1B|CCND1|C1QA|C1QC|CD14|FASN|SCD	-2.75722	0	55	0	0	-7.58938	129.789
0	0	0	0	0	1	0	0	0	0	0	-3.94742	WP5090	M000001	1	0	WikiPathways	27	Complement system in neuronal development and plasticity		-3.94742	16.173	7.56782	30284	107	70	4	5.71429	2.77431	712|714|1524|3687	C1QA|C1QC|CX3CR1|ITGAX	-2.58765	0	55	0	0	-7.58938	129.789
0	0	0	0	0	1	0	0	0	0	0	-3.09982	hsa05133	M000001	1	0	KEGG Pathway	24	Pertussis		-3.09982	16.6396	6.65686	30284	78	70	3	4.28571	2.42076	712|714|929	C1QA|C1QC|CD14	-1.90497	0	55	0	0	-7.58938	129.789
0	0	0	0	0	1	0	0	0	0	0	-2.94788	hsa04610	M000001	1	0	KEGG Pathway	24	Complement and coagulation cascades		-2.94788	14.7487	6.21688	30284	88	70	3	4.28571	2.42076	712|714|3687	C1QA|C1QC|ITGAX	-1.78226	0	55	0	0	-7.58938	129.789
0	0	0	0	0	1	0	0	0	0	0	-2.75135	hsa05142	M000001	1	0	KEGG Pathway	24	Chagas disease		-2.75135	12.6008	5.67656	30284	103	70	3	4.28571	2.42076	712|714|5290	C1QA|C1QC|PIK3CA	-1.62191	0	55	0	0	-7.58938	129.789
0	0	0	0	0	1	0	0	0	0	0	-2.40198	hsa05020	M000001	1	0	KEGG Pathway	24	Prion disease		-2.40198	6.22487	4.21248	30284	278	70	4	5.71429	2.77431	712|714|857|5290	C1QA|C1QC|CAV1|PIK3CA	-1.33321	0	55	0	0	-7.58938	129.789
0	0	0	0	1	0	0	0	0	0	-7.55506	0	M66	M000010	1	0	Canonical Pathways	11	PID MYC ACTIV PATHWAY		-7.55506	56.3738	16.5217	30284	79	34	5	14.7059	6.07387	332|891|2597|3159|7037	BIRC5|CCNB1|GAPDH|HMGA1|TFRC	-5.57836	0	56	1	1	-7.55506	56.3738
0	0	1	1	0	1	0	0	-2.72259	-2.23203	0	-5.3974	GO:0034612	M001101	3	0	GO Biological Processes	19	response to tumor necrosis factor	19_GO:0050896 response to stimulus	-7.49478	9.34246	9.10902	30284	181	197	11	5.58376	1.63589	929|1277|1524|2625|3856|3875|6422|8754|10631|58191|92610	CD14|COL1A1|CX3CR1|GATA3|KRT8|KRT18|SFRP1|ADAM9|POSTN|CXCL16|TIFA	-5.34842	0	57	1	1	-7.49478	33.5743
0	0	1	1	0	1	0	0	-2.91528	-2.41926	0	-3.33211	GO:0071356	M001101	3	0	GO Biological Processes	19	cellular response to tumor necrosis factor	19_GO:0050896 response to stimulus	-5.07282	7.93424	7.0035	30284	155	197	8	4.06091	1.4063	1277|1524|2625|3856|3875|6422|10631|92610	COL1A1|CX3CR1|GATA3|KRT8|KRT18|SFRP1|POSTN|TIFA	-3.38399	0	57	0	0	-7.49478	33.5743
0	0	1	0	0	0	0	0	-4.00294	0	0	0	GO:0010812	M001000	1	0	GO Biological Processes	19	negative regulation of cell-substrate adhesion	19_GO:0048519 negative regulation of biological process	-4.00294	33.5743	9.75423	30284	66	41	3	7.31707	4.06702	1277|5728|10631	COL1A1|PTEN|POSTN	-2.6326	0	57	0	0	-7.49478	33.5743
0	0	1	0	0	1	0	0	-3.17532	0	0	-3.67405	GO:0010717	M001001	2	0	GO Biological Processes	19	regulation of epithelial to mesenchymal transition	19_GO:0032502 developmental process	-3.74227	7.32028	5.75259	30284	126	197	6	3.04569	1.22431	1277|2296|2625|5728|6422|7422	COL1A1|FOXC1|GATA3|PTEN|SFRP1|VEGFA	-2.24913	0	57	0	0	-7.49478	33.5743
0	0	0	0	0	1	0	0	0	0	0	-4.4949	GO:0098657	M000001	1	0	GO Biological Processes	19	import into cell	19_GO:0051179 localization	-6.76472	4.19052	6.89557	30284	697	197	19	9.64467	2.10323	199|857|928|929|1265|2017|2207|4645|5175|5290|5914|7037|8884|22918|25800|29911|58191|115677|132299	AIF1|CAV1|CD9|CD14|CNN2|CTTN|FCER1G|MYO5B|PECAM1|PIK3CA|RARA|TFRC|SLC5A6|CD93|SLC39A6|HOOK2|CXCL16|NOSTRIN|OCIAD2	-4.75433	0	58	0	0	-7.35481	6.29287
0	0	0	0	0	1	0	0	0	0	0	-3.17189	GO:0006898	M000001	1	0	GO Biological Processes	19	receptor-mediated endocytosis	19_GO:0051179 localization	-3.86935	6.29287	5.61637	30284	171	197	7	3.5533	1.31894	857|928|929|2017|2207|7037|58191	CAV1|CD9|CD14|CTTN|FCER1G|TFRC|CXCL16	-2.36104	0	58	0	0	-7.35481	6.29287
0	0	1	0	0	1	0	0	-2.51143	0	0	-4.10593	GO:0010720	M001001	2	0	GO Biological Processes	19	positive regulation of cell development	19_GO:0032502 developmental process	-7.35029	5.50249	7.76019	30284	447	197	16	8.12183	1.94626	920|942|1524|1956|2625|3561|4311|5764|5788|5914|6387|6659|6790|7422|7852|10221	CD4|CD86|CX3CR1|EGFR|GATA3|IL2RG|MME|PTN|PTPRC|RARA|CXCL12|SOX4|AURKA|VEGFA|CXCR4|TRIB1	-5.22876	0	59	1	1	-7.35029	23.1765
0	0	0	0	0	1	0	0	0	0	0	-6.13534	GO:1903706	M000001	1	0	GO Biological Processes	19	regulation of hemopoiesis	19_GO:0002376 immune system process	-6.70203	5.28873	7.29891	30284	436	197	15	7.61421	1.88965	714|920|942|2064|2625|3561|5764|5788|5914|6422|6591|6659|10221|10875|56892	C1QC|CD4|CD86|ERBB2|GATA3|IL2RG|PTN|PTPRC|RARA|SFRP1|SNAI2|SOX4|TRIB1|FGL2|TCIM	-4.70993	0	59	0	0	-7.35029	23.1765
0	0	0	0	0	1	0	0	0	0	0	-4.8596	GO:1902105	M000001	1	0	GO Biological Processes	19	regulation of leukocyte differentiation	19_GO:0002376 immune system process	-5.58131	5.42562	6.64051	30284	340	197	12	6.09137	1.70403	714|920|942|2064|2625|3561|5788|5914|6422|6659|10221|10875	C1QC|CD4|CD86|ERBB2|GATA3|IL2RG|PTPRC|RARA|SFRP1|SOX4|TRIB1|FGL2	-3.78964	0	59	0	0	-7.35029	23.1765
0	0	0	0	0	1	0	0	0	0	0	-4.82044	GO:0050864	M000001	1	0	GO Biological Processes	19	regulation of B cell activation	19_GO:0002376 immune system process	-4.82044	16.1429	8.45592	30284	134	70	5	7.14286	3.07818	1880|3561|4332|5788|6422	GPR183|IL2RG|MNDA|PTPRC|SFRP1	-3.30547	0	59	0	0	-7.35029	23.1765
0	0	0	0	0	1	0	0	0	0	0	-3.75216	GO:0045619	M000001	1	0	GO Biological Processes	19	regulation of lymphocyte differentiation	19_GO:0002376 immune system process	-4.74522	6.14904	6.27297	30284	225	197	9	4.56853	1.48765	942|2064|2625|3561|5788|5914|6422|6659|10875	CD86|ERBB2|GATA3|IL2RG|PTPRC|RARA|SFRP1|SOX4|FGL2	-3.0988	0	59	0	0	-7.35029	23.1765
0	0	0	0	0	1	0	0	0	0	0	-2.98476	GO:0045580	M000001	1	0	GO Biological Processes	19	regulation of T cell differentiation	19_GO:0002376 immune system process	-4.40222	6.40525	6.07972	30284	192	197	8	4.06091	1.4063	942|2064|2625|3561|5788|5914|6659|10875	CD86|ERBB2|GATA3|IL2RG|PTPRC|RARA|SOX4|FGL2	-2.80537	0	59	0	0	-7.35029	23.1765
0	0	0	0	0	1	0	0	0	0	0	-2.95987	GO:1902107	M000001	1	0	GO Biological Processes	19	positive regulation of leukocyte differentiation	19_GO:0002376 immune system process	-4.35454	6.3067	6.01563	30284	195	197	8	4.06091	1.4063	920|942|2625|3561|5788|5914|6659|10221	CD4|CD86|GATA3|IL2RG|PTPRC|RARA|SOX4|TRIB1	-2.76925	0	59	0	0	-7.35029	23.1765
0	0	0	0	0	1	0	0	0	0	0	-2.95987	GO:1903708	M000001	1	0	GO Biological Processes	19	positive regulation of hemopoiesis	19_GO:0002376 immune system process	-4.35454	6.3067	6.01563	30284	195	197	8	4.06091	1.4063	920|942|2625|3561|5788|5914|6659|10221	CD4|CD86|GATA3|IL2RG|PTPRC|RARA|SOX4|TRIB1	-2.76925	0	59	0	0	-7.35029	23.1765
0	0	0	0	0	1	0	0	0	0	0	-4.028	GO:0050764	M000001	1	0	GO Biological Processes	19	regulation of phagocytosis	19_GO:0051179 localization	-4.028	16.9658	7.77431	30284	102	70	4	5.71429	2.77431	1265|2207|3561|5788	CNN2|FCER1G|IL2RG|PTPRC	-2.6512	0	59	0	0	-7.35029	23.1765
0	0	0	0	0	1	0	0	0	0	0	-2.54236	GO:0045582	M000001	1	0	GO Biological Processes	19	positive regulation of T cell differentiation	19_GO:0002376 immune system process	-3.81877	7.56029	5.87511	30284	122	197	6	3.04569	1.22431	942|2625|3561|5788|5914|6659	CD86|GATA3|IL2RG|PTPRC|RARA|SOX4	-2.31702	0	59	0	0	-7.35029	23.1765
0	0	0	0	0	1	0	0	0	0	0	-2.40079	GO:0045621	M000001	1	0	GO Biological Processes	19	positive regulation of lymphocyte differentiation	19_GO:0002376 immune system process	-3.5455	6.73252	5.4416	30284	137	197	6	3.04569	1.22431	942|2625|3561|5788|5914|6659	CD86|GATA3|IL2RG|PTPRC|RARA|SOX4	-2.08506	0	59	0	0	-7.35029	23.1765
0	0	0	0	0	1	0	0	0	0	0	-3.52249	GO:0002639	M000001	1	0	GO Biological Processes	19	positive regulation of immunoglobulin production	19_GO:0002376 immune system process	-3.52249	23.1765	7.99516	30284	56	70	3	4.28571	2.42076	942|3561|5788	CD86|IL2RG|PTPRC	-2.24086	0	59	0	0	-7.35029	23.1765
0	0	0	0	0	1	0	0	0	0	0	-3.29042	GO:0045807	M000001	1	0	GO Biological Processes	19	positive regulation of endocytosis	19_GO:0051179 localization	-3.29042	10.8837	6.01451	30284	159	70	4	5.71429	2.77431	929|2207|3561|5788	CD14|FCER1G|IL2RG|PTPRC	-2.05663	0	59	0	0	-7.35029	23.1765
0	0	0	0	0	1	0	0	0	0	0	-3.18372	GO:0050766	M000001	1	0	GO Biological Processes	19	positive regulation of phagocytosis	19_GO:0051179 localization	-3.18372	17.7793	6.90869	30284	73	70	3	4.28571	2.42076	2207|3561|5788	FCER1G|IL2RG|PTPRC	-1.97127	0	59	0	0	-7.35029	23.1765
0	0	0	0	0	1	0	0	0	0	0	-3.16646	GO:0046635	M000001	1	0	GO Biological Processes	19	positive regulation of alpha-beta T cell activation	19_GO:0002376 immune system process	-3.16646	17.539	6.85637	30284	74	70	3	4.28571	2.42076	942|3561|5788	CD86|IL2RG|PTPRC	-1.95698	0	59	0	0	-7.35029	23.1765
0	0	0	0	0	1	0	0	0	0	0	-3.09982	GO:0002637	M000001	1	0	GO Biological Processes	19	regulation of immunoglobulin production	19_GO:0002376 immune system process	-3.09982	16.6396	6.65686	30284	78	70	3	4.28571	2.42076	942|3561|5788	CD86|IL2RG|PTPRC	-1.90497	0	59	0	0	-7.35029	23.1765
0	0	0	0	0	1	0	0	0	0	0	-2.59378	GO:0046631	M000001	1	0	GO Biological Processes	19	alpha-beta T cell activation	19_GO:0002376 immune system process	-2.9875	6.56948	4.8841	30284	117	197	5	2.53807	1.12056	1880|2625|3561|5788|6097	GPR183|GATA3|IL2RG|PTPRC|RORC	-1.60633	0	59	0	0	-7.35029	23.1765
0	0	0	0	0	1	0	0	0	0	0	-2.95166	GO:0042113	M000001	1	0	GO Biological Processes	19	B cell activation	19_GO:0002376 immune system process	-2.95166	8.82915	5.29286	30284	196	70	4	5.71429	2.77431	942|1880|3561|5788	CD86|GPR183|IL2RG|PTPRC	-1.78538	0	59	0	0	-7.35029	23.1765
0	0	0	0	0	1	0	0	0	0	0	-2.53235	GO:0046634	M000001	1	0	GO Biological Processes	19	regulation of alpha-beta T cell activation	19_GO:0002376 immune system process	-2.89064	6.24902	4.7201	30284	123	197	5	2.53807	1.12056	942|2625|3561|5788|5914	CD86|GATA3|IL2RG|PTPRC|RARA	-1.5235	0	59	0	0	-7.35029	23.1765
0	0	0	0	0	1	0	0	0	0	0	-2.36588	GO:0002702	M000001	1	0	GO Biological Processes	19	positive regulation of production of molecular mediator of immune response	19_GO:0002376 immune system process	-2.63017	5.45127	4.2869	30284	141	197	5	2.53807	1.12056	942|2625|3561|5788|7037	CD86|GATA3|IL2RG|PTPRC|TFRC	-1.30355	0	59	0	0	-7.35029	23.1765
0	0	0	0	0	1	0	0	0	0	0	-2.61501	GO:0030183	M000001	1	0	GO Biological Processes	19	B cell differentiation	19_GO:0002376 immune system process	-2.61501	11.286	5.31934	30284	115	70	3	4.28571	2.42076	1880|3561|5788	GPR183|IL2RG|PTPRC	-1.5083	0	59	0	0	-7.35029	23.1765
0	0	0	0	0	1	0	0	0	0	0	-6.60842	GO:0045087	M000001	1	0	GO Biological Processes	19	innate immune response	19_GO:0044419 biological process involved in interspecies interaction between organisms	-7.23632	4.08122	7.1055	30284	791	197	21	10.6599	2.1987	199|712|714|929|1524|1613|2207|2214|2317|2597|2625|5468|6279|6732|7431|9582|9618|58191|84868|92610|120224	AIF1|C1QA|C1QC|CD14|CX3CR1|DAPK3|FCER1G|FCGR3A|FLNB|GAPDH|GATA3|PPARG|S100A8|SRPK1|VIM|APOBEC3B|TRAF4|CXCL16|HAVCR2|TIFA|TMEM45B	-5.14955	0	60	1	1	-7.23632	14.421
0	0	0	0	0	1	0	0	0	0	0	-3.93178	GO:0034341	M000001	1	0	GO Biological Processes	19	response to type II interferon	19_GO:0044419 biological process involved in interspecies interaction between organisms	-4.1109	8.54033	6.35206	30284	108	197	6	3.04569	1.22431	199|1613|2317|2597|7431|58191	AIF1|DAPK3|FLNB|GAPDH|VIM|CXCL16	-2.57424	0	60	0	0	-7.23632	14.421
0	0	0	0	0	1	0	0	0	0	0	-3.00634	GO:0071346	M000001	1	0	GO Biological Processes	19	cellular response to type II interferon	19_GO:0044419 biological process involved in interspecies interaction between organisms	-3.64711	9.15035	6.05279	30284	84	197	5	2.53807	1.12056	199|1613|2317|2597|7431	AIF1|DAPK3|FLNB|GAPDH|VIM	-2.16862	0	60	0	0	-7.23632	14.421
0	0	1	0	0	0	0	0	-5.58002	0	0	0	GO:0048844	M001000	1	0	GO Biological Processes	19	artery morphogenesis	19_GO:0032502 developmental process	-5.58002	41.6132	12.6147	30284	71	41	4	9.7561	4.63399	1281|4638|6659|7422	COL3A1|MYLK|SOX4|VEGFA	-3.93359	0	61	0	0	-7.19228	65.1736
0	0	1	0	0	0	0	0	-5.19612	0	0	0	GO:0021543	M001000	1	0	GO Biological Processes	19	pallium development	19_GO:0032502 developmental process	-5.19612	19.037	9.27966	30284	194	41	5	12.1951	5.11047	1281|1956|2316|5728|5914	COL3A1|EGFR|FLNA|PTEN|RARA	-3.61028	0	61	0	0	-7.19228	65.1736
0	0	1	0	0	0	0	0	-4.93153	0	0	0	GO:0060541	M001000	1	0	GO Biological Processes	19	respiratory system development	19_GO:0032502 developmental process	-4.93153	16.7871	8.65307	30284	220	41	5	12.1951	5.11047	1281|1291|1956|5914|7422	COL3A1|COL6A1|EGFR|RARA|VEGFA	-3.39357	0	61	0	0	-7.19228	65.1736
0	0	1	0	0	0	0	0	-4.91894	0	0	0	GO:0060840	M001000	1	0	GO Biological Processes	19	artery development	19_GO:0032502 developmental process	-4.91894	28.409	10.3093	30284	104	41	4	9.7561	4.63399	1281|4638|6659|7422	COL3A1|MYLK|SOX4|VEGFA	-3.38255	0	61	0	0	-7.19228	65.1736
0	0	1	0	0	0	0	0	-4.87337	0	0	0	GO:0035909	M001000	1	0	GO Biological Processes	19	aorta morphogenesis	19_GO:0032502 developmental process	-4.87337	65.1736	13.7852	30284	34	41	3	7.31707	4.06702	1281|4638|6659	COL3A1|MYLK|SOX4	-3.34782	0	61	0	0	-7.19228	65.1736
0	0	1	0	0	0	0	0	-4.06329	0	0	0	GO:0035904	M001000	1	0	GO Biological Processes	19	aorta development	19_GO:0032502 developmental process	-4.06329	35.1731	9.99721	30284	63	41	3	7.31707	4.06702	1281|4638|6659	COL3A1|MYLK|SOX4	-2.68047	0	61	0	0	-7.19228	65.1736
0	0	1	0	0	0	0	0	-3.87081	0	0	0	GO:0030324	M001000	1	0	GO Biological Processes	19	lung development	19_GO:0032502 developmental process	-3.87081	15.3085	7.34231	30284	193	41	4	9.7561	4.63399	1281|1291|1956|7422	COL3A1|COL6A1|EGFR|VEGFA	-2.52288	0	61	0	0	-7.19228	65.1736
0	0	1	0	0	0	0	0	-3.85909	0	0	0	GO:0050878	M001000	1	0	GO Biological Processes	19	regulation of body fluid levels	19_GO:0065007 biological regulation	-3.85909	9.98154	6.4002	30284	370	41	5	12.1951	5.11047	360|1281|1956|2316|7422	AQP3|COL3A1|EGFR|FLNA|VEGFA	-2.51319	0	61	0	0	-7.19228	65.1736
0	0	1	0	0	0	0	0	-3.83659	0	0	0	GO:0030323	M001000	1	0	GO Biological Processes	19	respiratory tube development	19_GO:0032502 developmental process	-3.83659	14.9976	7.25734	30284	197	41	4	9.7561	4.63399	1281|1291|1956|7422	COL3A1|COL6A1|EGFR|VEGFA	-2.49422	0	61	0	0	-7.19228	65.1736
0	0	1	0	0	0	0	0	-3.64248	0	0	0	GO:0030900	M001000	1	0	GO Biological Processes	19	forebrain development	19_GO:0032502 developmental process	-3.64248	8.96401	5.99276	30284	412	41	5	12.1951	5.11047	1281|1956|2316|5728|5914	COL3A1|EGFR|FLNA|PTEN|RARA	-2.33847	0	61	0	0	-7.19228	65.1736
0	0	1	0	0	0	0	0	-3.17771	0	0	0	GO:0048872	M001000	1	0	GO Biological Processes	19	homeostasis of number of cells	19_GO:0042592 homeostatic process	-3.17771	10.0494	5.74098	30284	294	41	4	9.7561	4.63399	1291|6659|7422|132299	COL6A1|SOX4|VEGFA|OCIAD2	-1.96563	0	61	0	0	-7.19228	65.1736
0	0	1	0	0	0	0	0	-3.13591	0	0	0	GO:0021987	M001000	1	0	GO Biological Processes	19	cerebral cortex development	19_GO:0032502 developmental process	-3.13591	17.0454	6.75039	30284	130	41	3	7.31707	4.06702	1281|1956|2316	COL3A1|EGFR|FLNA	-1.93338	0	61	0	0	-7.19228	65.1736
0	0	0	0	0	1	0	0	0	0	0	-2.14598	GO:0090092	M000001	1	0	GO Biological Processes	19	regulation of transmembrane receptor protein serine/threonine kinase signaling pathway	19_GO:0050896 response to stimulus	-2.14598	5.25992	3.73946	30284	329	70	4	5.71429	2.77431	857|1001|6422|9839	CAV1|CDH3|SFRP1|ZEB2	-1.11381	0	62	0	0	-7.13861	11.927
0	0	0	0	0	1	0	0	0	0	0	-5.02626	WP2813	M000001	1	0	WikiPathways	27	Mammary gland development embryonic development stage 1 of 4		-7.05282	42.7016	14.3204	30284	18	197	5	2.53807	1.12056	595|999|3655|6422|9839	CCND1|CDH1|ITGA6|SFRP1|ZEB2	-4.99161	0	63	1	1	-7.05282	42.7016
0	0	0	0	0	1	0	0	0	0	0	-3.3714	M254	M000001	1	0	Canonical Pathways	11	PID MYC REPRESS PATHWAY		-4.2419	12.2005	7.20104	30284	63	197	5	2.53807	1.12056	595|1278|2064|3655|6422	CCND1|COL1A2|ERBB2|ITGA6|SFRP1	-2.68133	0	63	0	0	-7.05282	42.7016
0	0	0	0	0	1	0	0	0	0	0	-3.02721	WP2877	M000001	1	0	WikiPathways	27	Vitamin D receptor pathway		-3.02721	9.25409	5.4497	30284	187	70	4	5.71429	2.77431	595|929|6275|6422	CCND1|CD14|S100A4|SFRP1	-1.84457	0	63	0	0	-7.05282	42.7016
0	0	0	0	0	1	0	0	0	0	0	-2.9337	M5493	M000001	1	0	Canonical Pathways	11	WNT SIGNALING		-2.9337	14.583	6.17685	30284	89	70	3	4.28571	2.42076	595|2597|6422	CCND1|GAPDH|SFRP1	-1.77006	0	63	0	0	-7.05282	42.7016
0	0	0	0	0	1	0	0	0	0	0	-5.08802	GO:0072132	M000001	1	0	GO Biological Processes	19	mesenchyme morphogenesis	19_GO:0032502 developmental process	-5.08802	31.4639	10.8843	30284	55	70	4	5.71429	2.77431	59|72|2296|6591	ACTA2|ACTG2|FOXC1|SNAI2	-3.52363	0	64	0	0	-7.00259	41.2027
0	0	0	0	0	1	0	0	0	0	0	-4.48398	GO:0043542	M000001	1	0	GO Biological Processes	19	endothelial cell migration	19_GO:0009987 cellular process	-4.91297	11.8251	7.74595	30284	78	197	6	3.04569	1.22431	5290|6279|6591|7422|9404|9839	PIK3CA|S100A8|SNAI2|VEGFA|LPXN|ZEB2	-3.24478	0	64	0	0	-7.00259	41.2027
0	0	0	1	1	1	0	0	0	-2.12943	-5.38401	-2.55966	R-HSA-194315	M000111	3	0	Reactome Gene Sets	6	Signaling by Rho GTPases		-6.99082	4.57366	7.18472	30284	605	197	18	9.13706	2.05288	367|857|991|999|1063|1832|2017|3728|4638|5290|6279|7037|7277|7431|10403|10409|11004|54443	AR|CAV1|CDC20|CDH1|CENPF|DSP|CTTN|JUP|MYLK|PIK3CA|S100A8|TFRC|TUBA4A|VIM|NDC80|BASP1|KIF2C|ANLN	-4.94561	0	65	1	1	-6.99082	5.66268
0	0	0	1	1	1	0	0	0	-2.08884	-5.31891	-2.51073	R-HSA-9716542	M000111	3	0	Reactome Gene Sets	6	Signaling by Rho GTPases, Miro GTPases and RHOBTB3		-6.84387	4.47022	7.05868	30284	619	197	18	9.13706	2.05288	367|857|991|999|1063|1832|2017|3728|4638|5290|6279|7037|7277|7431|10403|10409|11004|54443	AR|CAV1|CDC20|CDH1|CENPF|DSP|CTTN|JUP|MYLK|PIK3CA|S100A8|TFRC|TUBA4A|VIM|NDC80|BASP1|KIF2C|ANLN	-4.82165	0	65	0	0	-6.99082	5.66268
0	0	0	0	0	1	0	0	0	0	0	-2.71585	R-HSA-9012999	M000001	1	0	Reactome Gene Sets	6	RHO GTPase cycle		-2.71585	5.66268	4.41429	30284	382	70	5	7.14286	3.07818	857|1832|5290|7431|10409	CAV1|DSP|PIK3CA|VIM|BASP1	-1.59401	0	65	0	0	-6.99082	5.66268
0	0	0	0	0	1	0	0	0	0	0	-3.41269	WP5236	M000001	1	0	WikiPathways	27	Markers of kidney cell lineage		-3.41269	21.2768	7.63028	30284	61	70	3	4.28571	2.42076	59|5175|6422	ACTA2|PECAM1|SFRP1	-2.15203	0	66	0	0	-6.98431	87.695
0	0	1	1	0	0	0	0	-3.45272	-2.53158	0	0	GO:0000902	M001100	2	0	GO Biological Processes	19	cell morphogenesis	19_GO:0032502 developmental process	-4.76816	3.48387	5.40369	30284	706	197	16	8.12183	1.94626	367|999|1001|1291|1956|2017|2064|2316|2317|2625|5728|5764|6387|6790|7422|10631	AR|CDH1|CDH3|COL6A1|EGFR|CTTN|ERBB2|FLNA|FLNB|GATA3|PTEN|PTN|CXCL12|AURKA|VEGFA|POSTN	-3.11971	0	67	0	0	-6.97718	16.5058
0	0	1	0	0	1	0	0	-3.28635	0	0	-2.41869	GO:0048511	M001001	2	0	GO Biological Processes	19	rhythmic process	19_GO:0048511 rhythmic process	-4.06864	5.03103	5.43375	30284	275	197	9	4.56853	1.48765	1291|1956|4313|5468|5728|5764|6097|7153|7298	COL6A1|EGFR|MMP2|PPARG|PTEN|PTN|RORC|TOP2A|TYMS	-2.53848	0	67	0	0	-6.97718	16.5058
0	0	1	0	0	0	0	0	-3.99677	0	0	0	GO:0008361	M001000	1	0	GO Biological Processes	19	regulation of cell size	19_GO:0065007 biological regulation	-3.99677	16.5058	7.6609	30284	179	41	4	9.7561	4.63399	1291|5728|7422|51520	COL6A1|PTEN|VEGFA|LARS1	-2.62775	0	67	0	0	-6.97718	16.5058
0	0	1	0	0	0	0	0	-2.56598	0	0	0	GO:0031175	M001000	1	0	GO Biological Processes	19	neuron projection development	19_GO:0032502 developmental process	-3.56502	3.00162	4.38916	30284	717	197	14	7.1066	1.83059	999|1956|2017|2064|2625|4313|5728|5764|6385|6387|6790|7422|7431|10631	CDH1|EGFR|CTTN|ERBB2|GATA3|MMP2|PTEN|PTN|SDC4|CXCL12|AURKA|VEGFA|VIM|POSTN	-2.10071	0	67	0	0	-6.97718	16.5058
0	0	1	0	0	1	0	0	-2.85658	0	0	-2.01606	GO:0032535	M001001	2	0	GO Biological Processes	19	regulation of cellular component size	19_GO:0065007 biological regulation	-3.2154	3.85385	4.40154	30284	359	197	9	4.56853	1.48765	999|1291|2017|5290|5728|6387|6840|7422|51520	CDH1|COL6A1|CTTN|PIK3CA|PTEN|CXCL12|SVIL|VEGFA|LARS1	-1.80121	0	67	0	0	-6.97718	16.5058
0	0	1	0	0	0	0	0	-2.34464	0	0	0	GO:0048812	M001000	1	0	GO Biological Processes	19	neuron projection morphogenesis	19_GO:0032502 developmental process	-2.78086	3.08687	3.79967	30284	498	197	10	5.07614	1.56394	1956|2017|2064|2625|5728|5764|6387|6790|7422|10631	EGFR|CTTN|ERBB2|GATA3|PTEN|PTN|CXCL12|AURKA|VEGFA|POSTN	-1.43243	0	67	0	0	-6.97718	16.5058
0	0	1	0	0	0	0	0	-2.32934	0	0	0	GO:0120039	M001000	1	0	GO Biological Processes	19	plasma membrane bounded cell projection morphogenesis	19_GO:0032502 developmental process	-2.74913	3.05618	3.76287	30284	503	197	10	5.07614	1.56394	1956|2017|2064|2625|5728|5764|6387|6790|7422|10631	EGFR|CTTN|ERBB2|GATA3|PTEN|PTN|CXCL12|AURKA|VEGFA|POSTN	-1.40433	0	67	0	0	-6.97718	16.5058
0	0	1	0	0	0	0	0	-2.30821	0	0	0	GO:0048858	M001000	1	0	GO Biological Processes	19	cell projection morphogenesis	19_GO:0032502 developmental process	-2.70544	3.01423	3.7121	30284	510	197	10	5.07614	1.56394	1956|2017|2064|2625|5728|5764|6387|6790|7422|10631	EGFR|CTTN|ERBB2|GATA3|PTEN|PTN|CXCL12|AURKA|VEGFA|POSTN	-1.37003	0	67	0	0	-6.97718	16.5058
0	0	0	0	0	1	0	0	0	0	0	-5.28944	GO:0048863	M000001	1	0	GO Biological Processes	19	stem cell differentiation	19_GO:0032502 developmental process	-5.28944	13.7342	8.45281	30284	189	70	6	8.57143	3.34594	2296|3861|5788|6422|6591|8626	FOXC1|KRT14|PTPRC|SFRP1|SNAI2|TP63	-3.69208	0	68	0	0	-6.95828	68.3098
0	0	0	0	0	1	0	0	0	0	0	-4.95235	GO:2000811	M000001	1	0	GO Biological Processes	19	negative regulation of anoikis	19_GO:0048519 negative regulation of biological process	-4.95235	68.3098	14.1263	30284	19	70	3	4.28571	2.42076	857|5290|6591	CAV1|PIK3CA|SNAI2	-3.40965	0	68	0	0	-6.95828	68.3098
0	0	0	0	0	1	0	0	0	0	0	-4.52874	GO:2000209	M000001	1	0	GO Biological Processes	19	regulation of anoikis	19_GO:0050789 regulation of biological process	-4.52874	49.9187	12.0112	30284	26	70	3	4.28571	2.42076	857|5290|6591	CAV1|PIK3CA|SNAI2	-3.05343	0	68	0	0	-6.95828	68.3098
0	0	0	0	0	1	0	0	0	0	0	-4.29752	GO:0001837	M000001	1	0	GO Biological Processes	19	epithelial to mesenchymal transition	19_GO:0032502 developmental process	-4.29752	19.891	8.4933	30284	87	70	4	5.71429	2.77431	2316|6275|6422|6591	FLNA|S100A4|SFRP1|SNAI2	-2.86349	0	68	0	0	-6.95828	68.3098
0	0	0	0	0	1	0	0	0	0	0	-4.26479	GO:0048762	M000001	1	0	GO Biological Processes	19	mesenchymal cell differentiation	19_GO:0032502 developmental process	-4.26479	12.3608	7.25479	30284	175	70	5	7.14286	3.07818	2296|2316|6275|6422|6591	FOXC1|FLNA|S100A4|SFRP1|SNAI2	-2.8386	0	68	0	0	-6.95828	68.3098
0	0	0	0	0	1	0	0	0	0	0	-3.72159	GO:0010837	M000001	1	0	GO Biological Processes	19	regulation of keratinocyte proliferation	19_GO:0050789 regulation of biological process	-3.72159	27.0393	8.69024	30284	48	70	3	4.28571	2.42076	1001|6591|8626	CDH3|SNAI2|TP63	-2.40407	0	68	0	0	-6.95828	68.3098
0	0	0	0	0	1	0	0	0	0	0	-2.99146	GO:0048864	M000001	1	0	GO Biological Processes	19	stem cell development	19_GO:0032502 developmental process	-2.99146	15.2692	6.34101	30284	85	70	3	4.28571	2.42076	2296|5788|6591	FOXC1|PTPRC|SNAI2	-1.81639	0	68	0	0	-6.95828	68.3098
0	0	0	0	0	1	0	0	0	0	0	-2.89217	GO:0014033	M000001	1	0	GO Biological Processes	19	neural crest cell differentiation	19_GO:0032502 developmental process	-2.89217	14.1075	6.06053	30284	92	70	3	4.28571	2.42076	2296|6422|6591	FOXC1|SFRP1|SNAI2	-1.73743	0	68	0	0	-6.95828	68.3098
0	0	0	0	0	1	0	0	0	0	0	-2.83898	GO:0072091	M000001	1	0	GO Biological Processes	19	regulation of stem cell proliferation	19_GO:0050789 regulation of biological process	-2.83898	13.5196	5.91364	30284	96	70	3	4.28571	2.42076	5788|6591|8626	PTPRC|SNAI2|TP63	-1.69167	0	68	0	0	-6.95828	68.3098
0	0	0	0	0	1	0	0	0	0	0	-2.61501	GO:0007219	M000001	1	0	GO Biological Processes	19	Notch signaling pathway	19_GO:0050896 response to stimulus	-2.61501	11.286	5.31934	30284	115	70	3	4.28571	2.42076	2296|6591|8626	FOXC1|SNAI2|TP63	-1.5083	0	68	0	0	-6.95828	68.3098
0	0	0	0	0	1	0	0	0	0	0	-2.29917	GO:0090090	M000001	1	0	GO Biological Processes	19	negative regulation of canonical Wnt signaling pathway	19_GO:0048519 negative regulation of biological process	-2.29917	8.71064	4.54143	30284	149	70	3	4.28571	2.42076	857|6422|6591	CAV1|SFRP1|SNAI2	-1.24613	0	68	0	0	-6.95828	68.3098
0	0	0	0	0	1	0	0	0	0	0	-2.06688	GO:0030178	M000001	1	0	GO Biological Processes	19	negative regulation of Wnt signaling pathway	19_GO:0048519 negative regulation of biological process	-2.06688	7.17064	4.00783	30284	181	70	3	4.28571	2.42076	857|6422|6591	CAV1|SFRP1|SNAI2	-1.04634	0	68	0	0	-6.95828	68.3098
0	0	0	0	0	1	0	0	0	0	0	-6.86136	GO:0002252	M000001	1	0	GO Biological Processes	19	immune effector process	19_GO:0002376 immune system process	-6.86136	9.12719	8.58406	30284	474	70	10	14.2857	4.18243	712|714|1524|1880|2205|2207|2214|5272|10875|84868	C1QA|C1QC|CX3CR1|GPR183|FCER1A|FCER1G|FCGR3A|SERPINB9|FGL2|HAVCR2	-4.99477	0	69	1	1	-6.86136	162.236
0	0	0	0	0	1	0	0	0	0	0	-6.23846	GO:0002366	M000001	1	0	GO Biological Processes	19	leukocyte activation involved in immune response	19_GO:0002376 immune system process	-6.23846	14.421	9.39381	30284	210	70	7	10	3.58569	1524|1880|2205|2207|2214|10875|84868	CX3CR1|GPR183|FCER1A|FCER1G|FCGR3A|FGL2|HAVCR2	-4.47311	0	69	0	0	-6.86136	162.236
0	0	0	0	0	1	0	0	0	0	0	-6.18256	R-HSA-2730905	M000001	1	0	Reactome Gene Sets	6	Role of LAT2/NTAL/LAB on calcium mobilization		-6.18256	162.236	21.9534	30284	8	70	3	4.28571	2.42076	2205|2207|5290	FCER1A|FCER1G|PIK3CA	-4.42771	0	69	0	0	-6.86136	162.236
0	0	0	0	0	1	0	0	0	0	0	-5.58805	GO:0002250	M000001	1	0	GO Biological Processes	19	adaptive immune response	19_GO:0002376 immune system process	-5.58805	6.60502	6.98045	30284	655	70	10	14.2857	4.18243	712|714|920|942|1524|1880|2205|2207|2214|84868	C1QA|C1QC|CD4|CD86|CX3CR1|GPR183|FCER1A|FCER1G|FCGR3A|HAVCR2	-3.9396	0	69	0	0	-6.86136	162.236
0	0	0	0	0	1	0	0	0	0	0	-4.7714	GO:0002275	M000001	1	0	GO Biological Processes	19	myeloid cell activation involved in immune response	19_GO:0002376 immune system process	-4.7714	26.2199	9.8725	30284	66	70	4	5.71429	2.77431	1524|2205|2207|84868	CX3CR1|FCER1A|FCER1G|HAVCR2	-3.26162	0	69	0	0	-6.86136	162.236
0	0	0	0	0	1	0	0	0	0	0	-4.38635	GO:0016064	M000001	1	0	GO Biological Processes	19	immunoglobulin mediated immune response	19_GO:0002376 immune system process	-4.38635	13.11	7.50773	30284	165	70	5	7.14286	3.07818	712|714|2205|2207|2214	C1QA|C1QC|FCER1A|FCER1G|FCGR3A	-2.9364	0	69	0	0	-6.86136	162.236
0	0	0	0	0	1	0	0	0	0	0	-4.32461	GO:0019724	M000001	1	0	GO Biological Processes	19	B cell mediated immunity	19_GO:0002376 immune system process	-4.32461	12.7244	7.3786	30284	170	70	5	7.14286	3.07818	712|714|2205|2207|2214	C1QA|C1QC|FCER1A|FCER1G|FCGR3A	-2.88558	0	69	0	0	-6.86136	162.236
0	0	0	0	0	1	0	0	0	0	0	-4.1677	GO:0002443	M000001	1	0	GO Biological Processes	19	leukocyte mediated immunity	19_GO:0002376 immune system process	-4.1677	8.68151	6.42502	30284	299	70	6	8.57143	3.34594	712|714|2205|2207|2214|5272	C1QA|C1QC|FCER1A|FCER1G|FCGR3A|SERPINB9	-2.76475	0	69	0	0	-6.86136	162.236
0	0	0	0	0	1	0	0	0	0	0	-4.02621	GO:0002437	M000001	1	0	GO Biological Processes	19	inflammatory response to antigenic stimulus	19_GO:0002376 immune system process	-4.02621	34.1549	9.8435	30284	38	70	3	4.28571	2.42076	968|2205|2214	CD68|FCER1A|FCGR3A	-2.65103	0	69	0	0	-6.86136	162.236
0	0	0	0	0	1	0	0	0	0	0	-3.72777	hsa04071	M000001	1	0	KEGG Pathway	24	Sphingolipid signaling pathway		-3.72777	14.1845	7.02359	30284	122	70	4	5.71429	2.77431	2205|2207|5290|5728	FCER1A|FCER1G|PIK3CA|PTEN	-2.40882	0	69	0	0	-6.86136	162.236
0	0	0	0	0	1	0	0	0	0	0	-3.55678	GO:0002460	M000001	1	0	GO Biological Processes	19	adaptive immune response based on somatic recombination of immune receptors built from immunoglobulin superfamily domains	19_GO:0002376 immune system process	-3.63232	4.9589	5.0655	30284	248	197	8	4.06091	1.4063	712|714|2205|2207|2214|2625|6097|9156	C1QA|C1QC|FCER1A|FCER1G|FCGR3A|GATA3|RORC|EXO1	-2.15656	0	69	0	0	-6.86136	162.236
0	0	0	0	0	1	0	0	0	0	0	-3.59751	GO:0002449	M000001	1	0	GO Biological Processes	19	lymphocyte mediated immunity	19_GO:0002376 immune system process	-3.59751	8.90182	5.95275	30284	243	70	5	7.14286	3.07818	712|714|2205|2207|2214	C1QA|C1QC|FCER1A|FCER1G|FCGR3A	-2.30457	0	69	0	0	-6.86136	162.236
0	0	0	0	0	1	0	0	0	0	0	-3.48771	hsa05322	M000001	1	0	KEGG Pathway	24	Systemic lupus erythematosus		-3.48771	12.2732	6.45812	30284	141	70	4	5.71429	2.77431	712|714|942|2214	C1QA|C1QC|CD86|FCGR3A	-2.21214	0	69	0	0	-6.86136	162.236
0	0	0	0	0	1	0	0	0	0	0	-3.45543	GO:0038093	M000001	1	0	GO Biological Processes	19	Fc receptor signaling pathway	19_GO:0002376 immune system process	-3.45543	21.9981	7.77081	30284	59	70	3	4.28571	2.42076	2205|2207|2214	FCER1A|FCER1G|FCGR3A	-2.18457	0	69	0	0	-6.86136	162.236
0	0	0	0	0	1	0	0	0	0	0	-3.43388	M7	M000001	1	0	Canonical Pathways	11	PID FCER1 PATHWAY		-3.43388	21.6314	7.69969	30284	60	70	3	4.28571	2.42076	2205|2207|5290	FCER1A|FCER1G|PIK3CA	-2.16766	0	69	0	0	-6.86136	162.236
0	0	0	0	0	1	0	0	0	0	0	-3.25533	hsa04664	M000001	1	0	KEGG Pathway	24	Fc epsilon RI signaling pathway		-3.25533	18.8099	7.12886	30284	69	70	3	4.28571	2.42076	2205|2207|5290	FCER1A|FCER1G|PIK3CA	-2.02967	0	69	0	0	-6.86136	162.236
0	0	0	0	0	1	0	0	0	0	0	-3.23703	GO:0002444	M000001	1	0	GO Biological Processes	19	myeloid leukocyte mediated immunity	19_GO:0002376 immune system process	-3.23703	18.5412	7.07211	30284	70	70	3	4.28571	2.42076	2205|2214|5272	FCER1A|FCGR3A|SERPINB9	-2.0148	0	69	0	0	-6.86136	162.236
0	0	0	0	0	1	0	0	0	0	0	-2.99146	R-HSA-2454202	M000001	1	0	Reactome Gene Sets	6	Fc epsilon receptor (FCERI) signaling		-2.99146	15.2692	6.34101	30284	85	70	3	4.28571	2.42076	2205|2207|5290	FCER1A|FCER1G|PIK3CA	-1.81639	0	69	0	0	-6.86136	162.236
0	0	0	0	0	1	0	0	0	0	0	-2.80062	hsa04666	M000001	1	0	KEGG Pathway	24	Fc gamma R-mediated phagocytosis		-2.80062	13.11	5.8091	30284	99	70	3	4.28571	2.42076	2214|5290|5788	FCGR3A|PIK3CA|PTPRC	-1.66217	0	69	0	0	-6.86136	162.236
0	0	0	0	0	1	0	0	0	0	0	-2.42772	hsa04650	M000001	1	0	KEGG Pathway	24	Natural killer cell mediated cytotoxicity		-2.42772	9.68571	4.85019	30284	134	70	3	4.28571	2.42076	2207|2214|5290	FCER1G|FCGR3A|PIK3CA	-1.35546	0	69	0	0	-6.86136	162.236
0	0	0	0	0	1	0	0	0	0	0	-2.29917	hsa04072	M000001	1	0	KEGG Pathway	24	Phospholipase D signaling pathway		-2.29917	8.71064	4.54143	30284	149	70	3	4.28571	2.42076	2205|2207|5290	FCER1A|FCER1G|PIK3CA	-1.24613	0	69	0	0	-6.86136	162.236
0	0	0	0	0	1	0	0	0	0	0	-5.6936	GO:0034113	M000001	1	0	GO Biological Processes	19	heterotypic cell-cell adhesion	19_GO:0009987 cellular process	-6.71768	23.6501	11.453	30284	39	197	6	3.04569	1.22431	1824|1832|3687|3728|5788|7070	DSC2|DSP|ITGAX|JUP|PTPRC|THY1	-4.72108	0	70	1	1	-6.71768	31.0287
0	0	0	0	0	1	0	0	0	0	0	-5.56207	GO:1903115	M000001	1	0	GO Biological Processes	19	regulation of actin filament-based movement	19_GO:0050789 regulation of biological process	-6.51848	21.9608	10.9995	30284	42	197	6	3.04569	1.22431	59|857|1824|1832|3728|9839	ACTA2|CAV1|DSC2|DSP|JUP|ZEB2	-4.55779	0	70	0	0	-6.71768	31.0287
0	0	0	0	0	1	0	0	0	0	0	-3.35127	GO:0098900	M000001	1	0	GO Biological Processes	19	regulation of action potential	19_GO:0050789 regulation of biological process	-4.20885	12.0098	7.13455	30284	64	197	5	2.53807	1.12056	857|1824|1832|2316|3728	CAV1|DSC2|DSP|FLNA|JUP	-2.65487	0	70	0	0	-6.71768	31.0287
0	0	0	1	0	0	0	0	0	-4.1816	0	0	GO:0097306	M000100	1	0	GO Biological Processes	19	cellular response to alcohol	19_GO:0050896 response to stimulus	-4.1816	18.5592	8.17437	30284	107	61	4	6.55738	3.16937	999|3728|4193|8644	CDH1|JUP|MDM2|AKR1C3	-2.77327	0	70	0	0	-6.71768	31.0287
0	0	0	1	0	0	0	0	0	-3.89937	0	0	M142	M000100	1	0	Canonical Pathways	11	PID AJDISS 2PATHWAY		-3.89937	31.0287	9.35385	30284	48	61	3	4.91803	2.76873	999|1832|3728	CDH1|DSP|JUP	-2.54736	0	70	0	0	-6.71768	31.0287
0	0	0	1	0	0	0	0	0	-3.52751	0	0	GO:0046824	M000100	1	0	GO Biological Processes	19	positive regulation of nucleocytoplasmic transport	19_GO:0051179 localization	-3.52751	23.2715	8.01287	30284	64	61	3	4.91803	2.76873	999|3728|4193	CDH1|JUP|MDM2	-2.24433	0	70	0	0	-6.71768	31.0287
0	0	0	1	0	0	0	0	0	-3.36163	0	0	GO:0006937	M000100	1	0	GO Biological Processes	19	regulation of muscle contraction	19_GO:0032501 multicellular organismal process	-3.36163	11.3476	6.16748	30284	175	61	4	6.55738	3.16937	1613|1832|2017|3728	DAPK3|DSP|CTTN|JUP	-2.11274	0	70	0	0	-6.71768	31.0287
0	0	0	1	0	0	0	0	0	-3.32464	0	0	WP2118	M000100	1	0	WikiPathways	27	Arrhythmogenic right ventricular cardiomyopathy		-3.32464	19.8584	7.34619	30284	75	61	3	4.91803	2.76873	1832|3655|3728	DSP|ITGA6|JUP	-2.08297	0	70	0	0	-6.71768	31.0287
0	0	1	1	0	0	0	0	-2.10333	-2.19251	0	0	GO:0044057	M001100	2	0	GO Biological Processes	19	regulation of system process	19_GO:0032501 multicellular organismal process	-3.32285	3.15875	4.26259	30284	584	197	12	6.09137	1.70403	857|1613|1824|1832|1956|2017|3687|3728|4193|4313|5468|5728	CAV1|DAPK3|DSC2|DSP|EGFR|CTTN|ITGAX|JUP|MDM2|MMP2|PPARG|PTEN	-1.8893	0	70	0	0	-6.71768	31.0287
0	0	0	1	0	0	0	0	0	-2.88796	0	0	GO:0002027	M000100	1	0	GO Biological Processes	19	regulation of heart rate	19_GO:0032501 multicellular organismal process	-3.18091	7.25122	5.21694	30284	106	197	5	2.53807	1.12056	857|1824|1832|3728|4193	CAV1|DSC2|DSP|JUP|MDM2	-1.77259	0	70	0	0	-6.71768	31.0287
0	0	0	1	0	0	0	0	0	-3.15089	0	0	hsa05412	M000100	1	0	KEGG Pathway	24	Arrhythmogenic right ventricular cardiomyopathy		-3.15089	17.3183	6.80819	30284	86	61	3	4.91803	2.76873	1832|3655|3728	DSP|ITGA6|JUP	-1.94398	0	70	0	0	-6.71768	31.0287
0	0	0	1	0	0	0	0	0	-3.02533	0	0	GO:0090316	M000100	1	0	GO Biological Processes	19	positive regulation of intracellular protein transport	19_GO:0051179 localization	-3.02533	15.6777	6.43709	30284	95	61	3	4.91803	2.76873	999|3728|4193	CDH1|JUP|MDM2	-1.84339	0	70	0	0	-6.71768	31.0287
0	0	0	1	0	0	0	0	0	-2.87111	0	0	GO:1990778	M000100	1	0	GO Biological Processes	19	protein localization to cell periphery	19_GO:0051179 localization	-2.87111	8.37906	5.12354	30284	237	61	4	6.55738	3.16937	999|2064|3728|3875	CDH1|ERBB2|JUP|KRT18	-1.71897	0	70	0	0	-6.71768	31.0287
0	0	0	1	0	0	0	0	0	-2.74864	0	0	GO:0090257	M000100	1	0	GO Biological Processes	19	regulation of muscle system process	19_GO:0032501 multicellular organismal process	-2.82491	4.20344	4.16502	30284	256	197	7	3.5533	1.31894	857|1613|1824|1832|2017|3728|5468	CAV1|DAPK3|DSC2|DSP|CTTN|JUP|PPARG	-1.46722	0	70	0	0	-6.71768	31.0287
0	0	0	1	0	0	0	0	0	-2.74393	0	0	GO:0046822	M000100	1	0	GO Biological Processes	19	regulation of nucleocytoplasmic transport	19_GO:0051179 localization	-2.74393	12.5158	5.65471	30284	119	61	3	4.91803	2.76873	999|3728|4193	CDH1|JUP|MDM2	-1.61601	0	70	0	0	-6.71768	31.0287
0	0	1	0	0	0	0	0	-2.25764	0	0	0	GO:1903522	M001000	1	0	GO Biological Processes	19	regulation of blood circulation	19_GO:0032501 multicellular organismal process	-2.73977	4.06068	4.04936	30284	265	197	7	3.5533	1.31894	857|1824|1832|1956|3728|4193|4313	CAV1|DSC2|DSP|EGFR|JUP|MDM2|MMP2	-1.39639	0	70	0	0	-6.71768	31.0287
0	0	0	1	0	0	0	0	0	-2.54351	0	0	GO:0032388	M000100	1	0	GO Biological Processes	19	positive regulation of intracellular transport	19_GO:0051179 localization	-2.54351	10.6384	5.13528	30284	140	61	3	4.91803	2.76873	999|3728|4193	CDH1|JUP|MDM2	-1.44944	0	70	0	0	-6.71768	31.0287
0	0	0	1	0	0	0	0	0	-2.44304	0	0	GO:0033157	M000100	1	0	GO Biological Processes	19	regulation of intracellular protein transport	19_GO:0051179 localization	-2.44304	9.79853	4.88555	30284	152	61	3	4.91803	2.76873	999|3728|4193	CDH1|JUP|MDM2	-1.36807	0	70	0	0	-6.71768	31.0287
0	0	0	1	0	0	0	0	0	-2.12492	0	0	GO:0072659	M000100	1	0	GO Biological Processes	19	protein localization to plasma membrane	19_GO:0051179 localization	-2.12492	7.52211	4.13651	30284	198	61	3	4.91803	2.76873	999|3728|3875	CDH1|JUP|KRT18	-1.09691	0	70	0	0	-6.71768	31.0287
0	0	0	1	0	0	0	0	0	-2.05526	0	0	GO:0008016	M000100	1	0	GO Biological Processes	19	regulation of heart contraction	19_GO:0032501 multicellular organismal process	-2.05526	7.09227	3.98005	30284	210	61	3	4.91803	2.76873	1832|3728|4193	DSP|JUP|MDM2	-1.0352	0	70	0	0	-6.71768	31.0287
0	0	0	0	0	1	0	0	0	0	0	-3.81198	GO:0046660	M000001	1	0	GO Biological Processes	19	female sex differentiation	19_GO:0022414 reproductive process	-3.81198	14.9182	7.2291	30284	116	70	4	5.71429	2.77431	2296|4313|6422|8626	FOXC1|MMP2|SFRP1|TP63	-2.47649	0	71	0	0	-6.63981	23.3853
0	0	0	0	0	1	0	0	0	0	0	-3.4303	GO:0001649	M000001	1	0	GO Biological Processes	19	osteoblast differentiation	19_GO:0032502 developmental process	-3.4303	11.8528	6.32713	30284	146	70	4	5.71429	2.77431	1277|1291|6422|6591	COL1A1|COL6A1|SFRP1|SNAI2	-2.1666	0	71	0	0	-6.63981	23.3853
0	0	0	0	0	1	0	0	0	0	0	-3.15301	GO:0007369	M000001	1	0	GO Biological Processes	19	gastrulation	19_GO:0032502 developmental process	-3.15301	10.003	5.71598	30284	173	70	4	5.71429	2.77431	1291|2296|4313|6422	COL6A1|FOXC1|MMP2|SFRP1	-1.94537	0	71	0	0	-6.63981	23.3853
0	0	0	0	0	1	0	0	0	0	0	-2.82606	GO:0008585	M000001	1	0	GO Biological Processes	19	female gonad development	19_GO:0022414 reproductive process	-2.82606	13.3803	5.87828	30284	97	70	3	4.28571	2.42076	2296|4313|6422	FOXC1|MMP2|SFRP1	-1.68383	0	71	0	0	-6.63981	23.3853
0	0	0	0	0	1	0	0	0	0	0	-2.77573	GO:0046545	M000001	1	0	GO Biological Processes	19	development of primary female sexual characteristics	19_GO:0022414 reproductive process	-2.77573	12.8504	5.74189	30284	101	70	3	4.28571	2.42076	2296|4313|6422	FOXC1|MMP2|SFRP1	-1.64134	0	71	0	0	-6.63981	23.3853
0	0	0	0	0	1	0	0	0	0	0	-2.53235	GO:0001704	M000001	1	0	GO Biological Processes	19	formation of primary germ layer	19_GO:0032502 developmental process	-2.53235	10.5519	5.10934	30284	123	70	3	4.28571	2.42076	1291|2296|4313	COL6A1|FOXC1|MMP2	-1.44054	0	71	0	0	-6.63981	23.3853
0	0	0	1	0	0	0	0	0	-4.29631	0	0	M5908	M000100	1	0	Hallmark Gene Sets	23	HALLMARK ANDROGEN RESPONSE		-6.50828	12.2981	9.15712	30284	100	197	8	4.06091	1.4063	220|563|595|3856|3880|6319|6611|7163	ALDH1A3|AZGP1|CCND1|KRT8|KRT19|SCD|SMS|TPD52	-4.55267	0	73	1	1	-6.50828	12.2981
0	0	0	1	0	1	0	0	0	-2.96091	0	-2.78811	hsa04640	M000101	2	0	KEGG Pathway	24	Hematopoietic cell lineage		-6.50828	12.2981	9.15712	30284	100	197	8	4.06091	1.4063	920|928|929|960|3655|4311|7037|100133941	CD4|CD9|CD14|CD44|ITGA6|MME|TFRC|CD24	-4.55267	0	74	1	1	-6.50828	12.2981
0	0	0	0	1	0	0	0	0	0	-6.50243	0	GO:0061982	M000010	1	0	GO Biological Processes	19	meiosis I cell cycle process	19_GO:0022414 reproductive process	-6.50243	34.7932	12.8447	30284	128	34	5	14.7059	6.07387	991|6790|7153|9232|10403	CDC20|AURKA|TOP2A|PTTG1|NDC80	-4.6894	0	75	1	1	-6.50243	65.1736
0	0	0	0	1	0	0	0	0	0	-6.41088	0	GO:0051321	M000010	1	0	GO Biological Processes	19	meiotic cell cycle	19_GO:0022414 reproductive process	-6.41088	20.7947	10.684	30284	257	34	6	17.6471	6.53787	991|6790|7153|9156|9232|10403	CDC20|AURKA|TOP2A|EXO1|PTTG1|NDC80	-4.6167	0	75	0	0	-6.50243	65.1736
0	0	0	0	1	0	0	0	0	0	-5.6106	0	GO:1903046	M000010	1	0	GO Biological Processes	19	meiotic cell cycle process	19_GO:0022414 reproductive process	-5.6106	22.9563	10.2855	30284	194	34	5	14.7059	6.07387	991|6790|7153|9232|10403	CDC20|AURKA|TOP2A|PTTG1|NDC80	-3.95292	0	75	0	0	-6.50243	65.1736
0	0	0	0	1	0	0	0	0	0	-4.93353	0	GO:0007127	M000010	1	0	GO Biological Processes	19	meiosis I	19_GO:0022414 reproductive process	-4.93353	28.5026	10.3299	30284	125	34	4	11.7647	5.52551	6790|7153|9232|10403	AURKA|TOP2A|PTTG1|NDC80	-3.394	0	75	0	0	-6.50243	65.1736
0	0	0	0	1	0	0	0	0	0	-4.87337	0	GO:0007143	M000010	1	0	GO Biological Processes	19	female meiotic nuclear division	19_GO:0022414 reproductive process	-4.87337	65.1736	13.7852	30284	41	34	3	8.82353	4.86433	6790|7153|10403	AURKA|TOP2A|NDC80	-3.34782	0	75	0	0	-6.50243	65.1736
0	0	0	0	1	0	0	0	0	0	-4.37962	0	GO:0140013	M000010	1	0	GO Biological Processes	19	meiotic nuclear division	19_GO:0022414 reproductive process	-4.37962	20.5944	8.66498	30284	173	34	4	11.7647	5.52551	6790|7153|9232|10403	AURKA|TOP2A|PTTG1|NDC80	-2.93224	0	75	0	0	-6.50243	65.1736
0	0	0	0	1	1	0	0	0	0	-3.06089	-2.16243	GO:0007292	M000011	2	0	GO Biological Processes	19	female gamete generation	19_GO:0022414 reproductive process	-3.93316	6.4436	5.70797	30284	167	197	7	3.5533	1.31894	4313|5728|5764|6790|7153|8085|10403	MMP2|PTEN|PTN|AURKA|TOP2A|KMT2D|NDC80	-2.41967	0	75	0	0	-6.50243	65.1736
0	0	0	0	1	0	0	0	0	0	-3.81919	0	GO:0045132	M000010	1	0	GO Biological Processes	19	meiotic chromosome segregation	19_GO:0022414 reproductive process	-3.81919	29.0448	9.03183	30284	92	34	3	8.82353	4.86433	6790|9232|10403	AURKA|PTTG1|NDC80	-2.4818	0	75	0	0	-6.50243	65.1736
0	0	0	0	1	0	0	0	0	0	-3.77793	0	GO:0007098	M000010	1	0	GO Biological Processes	19	centrosome cycle	19_GO:0009987 cellular process	-3.77793	28.1276	8.87819	30284	95	34	3	8.82353	4.86433	6790|9768|10403	AURKA|PCLAF|NDC80	-2.44839	0	75	0	0	-6.50243	65.1736
0	0	0	0	1	0	0	0	0	0	-3.60168	0	GO:0031023	M000010	1	0	GO Biological Processes	19	microtubule organizing center organization	19_GO:0009987 cellular process	-3.60168	24.5148	8.24533	30284	109	34	3	8.82353	4.86433	6790|9768|10403	AURKA|PCLAF|NDC80	-2.30811	0	75	0	0	-6.50243	65.1736
0	0	1	0	1	0	0	0	-2.7415	0	-3.05027	0	GO:0031647	M001010	2	0	GO Biological Processes	19	regulation of protein stability	19_GO:0065007 biological regulation	-3.05027	9.23011	5.45575	30284	386	34	4	11.7647	5.52551	2597|4193|6790|10403	GAPDH|MDM2|AURKA|NDC80	-1.86415	0	75	0	0	-6.50243	65.1736
0	0	0	0	0	1	0	0	0	0	0	-6.47717	WP3945	M000001	1	0	WikiPathways	27	TYROBP causal network in microglia		-6.47717	34.8894	12.8571	30284	62	70	5	7.14286	3.07818	714|920|3687|10261|58191	C1QC|CD4|ITGAX|IGSF6|CXCL16	-4.66857	0	76	1	1	-6.47717	34.8894
0	0	0	0	0	1	0	0	0	0	0	-6.40748	M34	M000001	1	0	Canonical Pathways	11	PID TCR PATHWAY		-6.40748	33.7991	12.643	30284	64	70	5	7.14286	3.07818	920|942|2316|5728|5788	CD4|CD86|FLNA|PTEN|PTPRC	-4.61614	0	77	1	1	-6.40748	36.0524
0	0	0	0	0	1	0	0	0	0	0	-5.71531	WP5098	M000001	1	0	WikiPathways	27	T cell activation SARS CoV 2		-5.71531	24.5812	10.6629	30284	88	70	5	7.14286	3.07818	595|920|942|5728|5788	CCND1|CD4|CD86|PTEN|PTPRC	-4.03748	0	77	0	0	-6.40748	36.0524
0	0	0	0	0	1	0	0	0	0	0	-5.44092	M124	M000001	1	0	Canonical Pathways	11	PID CXCR4 PATHWAY		-5.44092	21.6314	9.94684	30284	100	70	5	7.14286	3.07818	920|5290|5728|5788|7852	CD4|PIK3CA|PTEN|PTPRC|CXCR4	-3.81632	0	77	0	0	-6.40748	36.0524
0	0	0	0	0	1	0	0	0	0	0	-4.74542	GO:0032663	M000001	1	0	GO Biological Processes	19	regulation of interleukin-2 production	19_GO:0032501 multicellular organismal process	-4.74542	25.8286	9.79282	30284	67	70	4	5.71429	2.77431	920|942|5788|84868	CD4|CD86|PTPRC|HAVCR2	-3.23784	0	77	0	0	-6.40748	36.0524
0	0	0	0	0	1	0	0	0	0	0	-4.09721	GO:0032743	M000001	1	0	GO Biological Processes	19	positive regulation of interleukin-2 production	19_GO:0032501 multicellular organismal process	-4.09721	36.0524	10.129	30284	36	70	3	4.28571	2.42076	920|942|5788	CD4|CD86|PTPRC	-2.70941	0	77	0	0	-6.40748	36.0524
0	0	0	0	0	1	0	0	0	0	0	-4.09721	M1315	M000001	1	0	Canonical Pathways	11	SIG PIP3 SIGNALING IN B LYMPHOCYTES		-4.09721	36.0524	10.129	30284	36	70	3	4.28571	2.42076	5290|5728|5788	PIK3CA|PTEN|PTPRC	-2.70941	0	77	0	0	-6.40748	36.0524
0	0	0	0	0	1	0	0	0	0	0	-4.02621	hsa05340	M000001	1	0	KEGG Pathway	24	Primary immunodeficiency		-4.02621	34.1549	9.8435	30284	38	70	3	4.28571	2.42076	920|3561|5788	CD4|IL2RG|PTPRC	-2.65103	0	77	0	0	-6.40748	36.0524
0	0	0	0	0	1	0	0	0	0	0	-3.39187	WP3863	M000001	1	0	WikiPathways	27	T cell antigen receptor TCR pathway during Staphylococcus aureus infection		-3.39187	20.9336	7.5625	30284	62	70	3	4.28571	2.42076	920|5290|5788	CD4|PIK3CA|PTPRC	-2.13482	0	77	0	0	-6.40748	36.0524
0	0	0	0	0	1	0	0	0	0	0	-3.3714	M10	M000001	1	0	Canonical Pathways	11	PID BCR 5PATHWAY		-3.3714	20.6014	7.49629	30284	63	70	3	4.28571	2.42076	5290|5728|5788	PIK3CA|PTEN|PTPRC	-2.12007	0	77	0	0	-6.40748	36.0524
0	0	0	0	0	1	0	0	0	0	0	-3.32158	GO:0050730	M000001	1	0	GO Biological Processes	19	regulation of peptidyl-tyrosine phosphorylation	19_GO:0050789 regulation of biological process	-3.32158	11.093	6.08336	30284	156	70	4	5.71429	2.77431	920|5175|5788|6422	CD4|PECAM1|PTPRC|SFRP1	-2.08149	0	77	0	0	-6.40748	36.0524
0	0	0	0	0	1	0	0	0	0	0	-3.02142	R-HSA-202403	M000001	1	0	Reactome Gene Sets	6	TCR signaling		-3.02142	15.6372	6.42732	30284	83	70	3	4.28571	2.42076	920|5290|5788	CD4|PIK3CA|PTPRC	-1.84155	0	77	0	0	-6.40748	36.0524
0	0	0	0	0	1	0	0	0	0	0	-2.60434	GO:0050731	M000001	1	0	GO Biological Processes	19	positive regulation of peptidyl-tyrosine phosphorylation	19_GO:0048518 positive regulation of biological process	-2.60434	11.1887	5.29197	30284	116	70	3	4.28571	2.42076	920|5175|5788	CD4|PECAM1|PTPRC	-1.49938	0	77	0	0	-6.40748	36.0524
0	0	0	0	0	1	0	0	0	0	0	-2.54236	hsa04660	M000001	1	0	KEGG Pathway	24	T cell receptor signaling pathway		-2.54236	10.6384	5.13452	30284	122	70	3	4.28571	2.42076	920|5290|5788	CD4|PIK3CA|PTPRC	-1.44886	0	77	0	0	-6.40748	36.0524
0	0	0	1	0	0	0	0	0	-6.3854	0	0	R-HSA-8957322	M000100	1	0	Reactome Gene Sets	6	Metabolism of steroids		-6.3854	21.1259	10.7614	30284	141	61	6	9.83607	3.81296	1645|2194|6319|6713|8644|10802	AKR1C1|FASN|SCD|SQLE|AKR1C3|SEC24A	-4.59966	0	78	1	1	-6.3854	43.1703
0	0	0	1	0	0	0	0	0	-5.6418	0	0	R-HSA-1655829	M000100	1	0	Reactome Gene Sets	6	Regulation of cholesterol biosynthesis by SREBP (SREBF)		-5.6418	43.1703	12.8589	30284	46	61	4	6.55738	3.16937	2194|6319|6713|10802	FASN|SCD|SQLE|SEC24A	-3.97831	0	78	0	0	-6.3854	43.1703
0	0	0	1	0	0	0	0	0	-4.93273	0	0	WP1982	M000100	1	0	WikiPathways	27	Sterol regulatory element binding proteins SREBP signaling		-5.22285	13.3675	8.32218	30284	69	197	6	3.04569	1.22431	2194|5290|5468|6319|6713|10802	FASN|PIK3CA|PPARG|SCD|SQLE|SEC24A	-3.50762	0	78	0	0	-6.3854	43.1703
0	0	0	1	0	0	0	0	0	-4.81183	0	0	M5892	M000100	1	0	Hallmark Gene Sets	23	HALLMARK CHOLESTEROL HOMEOSTASIS		-5.04553	12.4643	7.98969	30284	74	197	6	3.04569	1.22431	928|2194|5468|6319|6713|58191	CD9|FASN|PPARG|SCD|SQLE|CXCL16	-3.35836	0	78	0	0	-6.3854	43.1703
0	0	0	1	0	0	0	0	0	-4.31331	0	0	R-HSA-2426168	M000100	1	0	Reactome Gene Sets	6	Activation of gene expression by SREBF (SREBP)		-4.31331	42.5536	11.0505	30284	35	61	3	4.91803	2.76873	2194|6319|6713	FASN|SCD|SQLE	-2.87789	0	78	0	0	-6.3854	43.1703
0	0	0	1	0	0	0	0	0	-4.20495	0	0	R-HSA-9024446	M000100	1	0	Reactome Gene Sets	6	NR1H2 and NR1H3-mediated signaling		-4.20495	39.1941	10.584	30284	38	61	3	4.91803	2.76873	341|2194|6319	APOC1|FASN|SCD	-2.7937	0	78	0	0	-6.3854	43.1703
0	0	0	1	0	0	0	0	0	-3.92678	0	0	WP4718	M000100	1	0	WikiPathways	27	Cholesterol metabolism with Bloch and Kandutsch Russell pathways		-3.92678	31.6889	9.45924	30284	47	61	3	4.91803	2.76873	2194|6319|6713	FASN|SCD|SQLE	-2.5701	0	78	0	0	-6.3854	43.1703
0	0	0	1	0	0	0	0	0	-3.63842	0	0	GO:0046394	M000100	1	0	GO Biological Processes	19	carboxylic acid biosynthetic process	19_GO:0009987 cellular process	-3.63842	9.05947	6.02066	30284	274	61	5	8.19672	3.51224	220|1491|2194|6319|8644	ALDH1A3|CTH|FASN|SCD|AKR1C3	-2.33529	0	78	0	0	-6.3854	43.1703
0	0	0	1	0	0	0	0	0	-3.6166	0	0	GO:0016053	M000100	1	0	GO Biological Processes	19	organic acid biosynthetic process	19_GO:0009987 cellular process	-3.6166	8.96135	5.98014	30284	277	61	5	8.19672	3.51224	220|1491|2194|6319|8644	ALDH1A3|CTH|FASN|SCD|AKR1C3	-2.31853	0	78	0	0	-6.3854	43.1703
0	0	0	1	0	0	0	0	0	-3.39955	0	0	GO:0072330	M000100	1	0	GO Biological Processes	19	monocarboxylic acid biosynthetic process	19_GO:0009987 cellular process	-3.39955	11.6131	6.25256	30284	171	61	4	6.55738	3.16937	220|2194|6319|8644	ALDH1A3|FASN|SCD|AKR1C3	-2.14084	0	78	0	0	-6.3854	43.1703
0	0	0	1	0	0	0	0	0	-3.32965	0	0	R-HSA-556833	M000100	1	0	Reactome Gene Sets	6	Metabolism of lipids		-3.32965	5.02925	4.81354	30284	691	61	7	11.4754	4.08085	1645|2194|6319|6713|8644|9968|10802	AKR1C1|FASN|SCD|SQLE|AKR1C3|MED12|SEC24A	-2.08678	0	78	0	0	-6.3854	43.1703
0	0	0	1	0	0	0	0	0	-3.01055	0	0	GO:0019752	M000100	1	0	GO Biological Processes	19	carboxylic acid metabolic process	19_GO:0009987 cellular process	-3.01055	4.43833	4.37931	30284	783	61	7	11.4754	4.08085	125|220|1491|1645|2194|6319|8644	ADH1B|ALDH1A3|CTH|AKR1C1|FASN|SCD|AKR1C3	-1.8324	0	78	0	0	-6.3854	43.1703
0	0	0	1	0	0	0	0	0	-2.72327	0	0	GO:0006633	M000100	1	0	GO Biological Processes	19	fatty acid biosynthetic process	19_GO:0009987 cellular process	-2.72327	12.3089	5.59979	30284	121	61	3	4.91803	2.76873	2194|6319|8644	FASN|SCD|AKR1C3	-1.59901	0	78	0	0	-6.3854	43.1703
0	0	0	1	0	0	0	0	0	-2.60636	0	0	GO:0044283	M000100	1	0	GO Biological Processes	19	small molecule biosynthetic process	19_GO:0009987 cellular process	-2.60636	5.32681	4.2288	30284	466	61	5	8.19672	3.51224	220|1491|2194|6319|8644	ALDH1A3|CTH|FASN|SCD|AKR1C3	-1.50052	0	78	0	0	-6.3854	43.1703
0	0	0	1	0	0	0	0	0	-2.36566	0	0	R-HSA-8978868	M000100	1	0	Reactome Gene Sets	6	Fatty acid metabolism		-2.36566	9.19369	4.69776	30284	162	61	3	4.91803	2.76873	2194|6319|8644	FASN|SCD|AKR1C3	-1.30193	0	78	0	0	-6.3854	43.1703
0	0	0	1	0	0	0	0	0	-2.13827	0	0	GO:0008610	M000100	1	0	GO Biological Processes	19	lipid biosynthetic process	19_GO:0009987 cellular process	-2.13827	4.12341	3.47758	30284	602	61	5	8.19672	3.51224	220|2194|6319|6713|8644	ALDH1A3|FASN|SCD|SQLE|AKR1C3	-1.10758	0	78	0	0	-6.3854	43.1703
0	0	1	0	0	1	0	0	-2.17059	0	0	-5.35778	GO:0010721	M001001	2	0	GO Biological Processes	19	negative regulation of cell development	19_GO:0032502 developmental process	-6.38278	6.47267	7.51123	30284	285	197	12	6.09137	1.70403	714|999|2064|5728|5764|5914|6422|6591|7070|7422|10221|10875	C1QC|CDH1|ERBB2|PTEN|PTN|RARA|SFRP1|SNAI2|THY1|VEGFA|TRIB1|FGL2	-4.44913	0	79	1	1	-6.38278	8.47308
0	0	0	0	0	1	0	0	0	0	0	-3.6609	GO:1903707	M000001	1	0	GO Biological Processes	19	negative regulation of hemopoiesis	19_GO:0002376 immune system process	-4.6885	8.47308	6.8289	30284	127	197	7	3.5533	1.31894	714|2064|5914|6422|6591|10221|10875	C1QC|ERBB2|RARA|SFRP1|SNAI2|TRIB1|FGL2	-3.05501	0	79	0	0	-6.38278	8.47308
0	0	0	0	0	1	0	0	0	0	0	-2.56265	GO:1902106	M000001	1	0	GO Biological Processes	19	negative regulation of leukocyte differentiation	19_GO:0002376 immune system process	-3.85809	7.68629	5.93847	30284	120	197	6	3.04569	1.22431	714|2064|5914|6422|10221|10875	C1QC|ERBB2|RARA|SFRP1|TRIB1|FGL2	-2.35052	0	79	0	0	-6.38278	8.47308
0	0	0	0	0	1	0	0	0	0	0	-2.46465	GO:0002761	M000001	1	0	GO Biological Processes	19	regulation of myeloid leukocyte differentiation	19_GO:0002376 immune system process	-2.78435	5.91253	4.54201	30284	130	197	5	2.53807	1.12056	714|920|5914|6422|10221	C1QC|CD4|RARA|SFRP1|TRIB1	-1.43387	0	79	0	0	-6.38278	8.47308
0	0	0	0	1	1	0	0	0	0	-4.15406	-3.21899	GO:1902808	M000011	2	0	GO Biological Processes	19	positive regulation of cell cycle G1/S phase transition	19_GO:0048518 positive regulation of biological process	-6.38267	15.1561	9.66314	30284	71	197	7	3.5533	1.31894	199|595|990|1956|4193|6241|8626	AIF1|CCND1|CDC6|EGFR|MDM2|RRM2|TP63	-4.44913	0	80	1	1	-6.38267	16.4706
0	0	0	0	1	0	0	0	0	0	-4.46333	0	GO:1900087	M000010	1	0	GO Biological Processes	19	positive regulation of G1/S transition of mitotic cell cycle	19_GO:0048518 positive regulation of biological process	-5.75967	16.4706	9.37649	30284	56	197	6	3.04569	1.22431	199|595|990|1956|4193|6241	AIF1|CCND1|CDC6|EGFR|MDM2|RRM2	-3.9267	0	80	0	0	-6.38267	16.4706
0	0	0	0	1	1	0	0	0	0	-2.71747	-2.76754	GO:1902806	M000011	2	0	GO Biological Processes	19	regulation of cell cycle G1/S phase transition	19_GO:0050789 regulation of biological process	-5.70584	6.98754	7.2124	30284	220	197	10	5.07614	1.56394	199|595|990|1956|4193|4582|5728|6241|8626|56892	AIF1|CCND1|CDC6|EGFR|MDM2|MUC1|PTEN|RRM2|TP63|TCIM	-3.88984	0	80	0	0	-6.38267	16.4706
0	0	0	0	1	1	0	0	0	0	-2.89292	-2.00353	GO:2000045	M000011	2	0	GO Biological Processes	19	regulation of G1/S transition of mitotic cell cycle	19_GO:0050789 regulation of biological process	-4.41831	6.43878	6.10139	30284	191	197	8	4.06091	1.4063	199|595|990|1956|4193|4582|5728|6241	AIF1|CCND1|CDC6|EGFR|MDM2|MUC1|PTEN|RRM2	-2.81875	0	80	0	0	-6.38267	16.4706
0	0	0	0	0	1	0	0	0	0	0	-2.77573	GO:0048661	M000001	1	0	GO Biological Processes	19	positive regulation of smooth muscle cell proliferation	19_GO:0048518 positive regulation of biological process	-3.27657	7.61019	5.38439	30284	101	197	5	2.53807	1.12056	199|1956|4193|4313|5290	AIF1|EGFR|MDM2|MMP2|PIK3CA	-1.85037	0	80	0	0	-6.38267	16.4706
0	0	1	1	0	1	0	0	-3.14766	-3.16757	0	-3.65551	GO:0061061	M001101	3	0	GO Biological Processes	19	muscle structure development	19_GO:0032502 developmental process	-6.36322	4.64955	6.85221	30284	529	197	16	8.12183	1.94626	857|928|1063|1281|1291|1832|2296|2317|3856|3880|4604|4638|5914|6840|7422|10409	CAV1|CD9|CENPF|COL3A1|COL6A1|DSP|FOXC1|FLNB|KRT8|KRT19|MYBPC1|MYLK|RARA|SVIL|VEGFA|BASP1	-4.43357	0	81	1	1	-6.36322	33.8495
0	0	0	1	0	0	0	0	0	-2.45108	0	0	GO:0001890	M000100	1	0	GO Biological Processes	19	placenta development	19_GO:0032502 developmental process	-4.2074	7.12637	6.10679	30284	151	197	7	3.5533	1.31894	1956|2706|3856|3880|4311|5468|5764	EGFR|GJB2|KRT8|KRT19|MME|PPARG|PTN	-2.65424	0	81	0	0	-6.36322	33.8495
0	0	0	1	0	0	0	0	0	-4.01281	0	0	GO:0045214	M000100	1	0	GO Biological Processes	19	sarcomere organization	19_GO:0032502 developmental process	-4.01281	33.8495	9.79624	30284	44	61	3	4.91803	2.76873	3856|3880|4604	KRT8|KRT19|MYBPC1	-2.6414	0	81	0	0	-6.36322	33.8495
0	0	0	1	0	0	0	0	0	-3.86687	0	0	GO:0010927	M000100	1	0	GO Biological Processes	19	cellular component assembly involved in morphogenesis	19_GO:0032502 developmental process	-3.86687	15.3941	7.36028	30284	129	61	4	6.55738	3.16937	928|3856|3880|4604	CD9|KRT8|KRT19|MYBPC1	-2.51996	0	81	0	0	-6.36322	33.8495
0	0	0	1	0	0	0	0	0	-3.86687	0	0	GO:0032989	M000100	1	0	GO Biological Processes	19	cellular anatomical entity morphogenesis	19_GO:0009987 cellular process	-3.86687	15.3941	7.36028	30284	129	61	4	6.55738	3.16937	928|3856|3880|4604	CD9|KRT8|KRT19|MYBPC1	-2.51996	0	81	0	0	-6.36322	33.8495
0	0	0	1	0	0	0	0	0	-3.44978	0	0	GO:0030239	M000100	1	0	GO Biological Processes	19	myofibril assembly	19_GO:0032502 developmental process	-3.44978	21.9026	7.75232	30284	68	61	3	4.91803	2.76873	3856|3880|4604	KRT8|KRT19|MYBPC1	-2.18103	0	81	0	0	-6.36322	33.8495
0	0	1	1	0	0	0	0	-2.46093	-2.96132	0	0	GO:0051146	M001100	2	0	GO Biological Processes	19	striated muscle cell differentiation	19_GO:0032502 developmental process	-3.16077	4.80393	4.62387	30284	224	197	7	3.5533	1.31894	928|1291|3856|3880|4604|5914|7422	CD9|COL6A1|KRT8|KRT19|MYBPC1|RARA|VEGFA	-1.75536	0	81	0	0	-6.36322	33.8495
0	0	0	1	0	0	0	0	0	-2.50902	0	0	GO:0055002	M000100	1	0	GO Biological Processes	19	striated muscle cell development	19_GO:0032502 developmental process	-2.59057	5.3377	4.22195	30284	144	197	5	2.53807	1.12056	1291|3856|3880|4604|7422	COL6A1|KRT8|KRT19|MYBPC1|VEGFA	-1.26732	0	81	0	0	-6.36322	33.8495
0	0	1	1	0	0	0	0	-2.15811	-2.56361	0	0	GO:0042692	M001100	2	0	GO Biological Processes	19	muscle cell differentiation	19_GO:0032502 developmental process	-2.56361	6.89526	4.5161	30284	288	61	4	6.55738	3.16937	928|3856|3880|4604	CD9|KRT8|KRT19|MYBPC1	-1.46431	0	81	0	0	-6.36322	33.8495
0	0	0	1	0	0	0	0	0	-2.28634	0	0	GO:0055001	M000100	1	0	GO Biological Processes	19	muscle cell development	19_GO:0032502 developmental process	-2.28634	8.60912	4.5091	30284	173	61	3	4.91803	2.76873	3856|3880|4604	KRT8|KRT19|MYBPC1	-1.23587	0	81	0	0	-6.36322	33.8495
0	0	0	0	0	1	0	0	0	0	0	-4.47831	GO:0032753	M000001	1	0	GO Biological Processes	19	positive regulation of interleukin-4 production	19_GO:0032501 multicellular organismal process	-6.09933	28.4678	11.5541	30284	27	197	5	2.53807	1.12056	942|2207|2625|5914|84868	CD86|FCER1G|GATA3|RARA|HAVCR2	-4.19418	0	82	1	1	-6.09933	28.4678
0	0	0	0	0	1	0	0	0	0	0	-4.13428	GO:0032673	M000001	1	0	GO Biological Processes	19	regulation of interleukin-4 production	19_GO:0032501 multicellular organismal process	-5.51332	21.9608	10.0399	30284	35	197	5	2.53807	1.12056	942|2207|2625|5914|84868	CD86|FCER1G|GATA3|RARA|HAVCR2	-3.73445	0	82	0	0	-6.09933	28.4678
0	0	0	0	0	1	0	0	0	0	0	-2.16898	GO:0042742	M000001	1	0	GO Biological Processes	19	defense response to bacterium	19_GO:0044419 biological process involved in interspecies interaction between organisms	-2.16898	5.34109	3.78133	30284	324	70	4	5.71429	2.77431	920|2207|4069|84868	CD4|FCER1G|LYZ|HAVCR2	-1.13361	0	82	0	0	-6.09933	28.4678
0	0	0	0	0	1	0	0	0	0	0	-6.04763	GO:0001911	M000001	1	0	GO Biological Processes	19	negative regulation of leukocyte mediated cytotoxicity	19_GO:0002376 immune system process	-6.04763	54.0786	14.4598	30284	32	70	4	5.71429	2.77431	1524|5272|5788|84868	CX3CR1|SERPINB9|PTPRC|HAVCR2	-4.3118	0	83	1	1	-6.04763	54.0786
0	0	0	0	0	1	0	0	0	0	0	-5.88672	GO:0031342	M000001	1	0	GO Biological Processes	19	negative regulation of cell killing	19_GO:0048519 negative regulation of biological process	-5.88672	49.4433	13.8025	30284	35	70	4	5.71429	2.77431	1524|5272|5788|84868	CX3CR1|SERPINB9|PTPRC|HAVCR2	-4.17969	0	83	0	0	-6.04763	54.0786
0	0	0	0	0	1	0	0	0	0	0	-5.02575	GO:0007159	M000001	1	0	GO Biological Processes	19	leukocyte cell-cell adhesion	19_GO:0009987 cellular process	-5.02575	30.3599	10.6792	30284	57	70	4	5.71429	2.77431	960|1524|5175|5788	CD44|CX3CR1|PECAM1|PTPRC	-3.46684	0	83	0	0	-6.04763	54.0786
0	0	0	0	0	1	0	0	0	0	0	-4.82044	GO:0002698	M000001	1	0	GO Biological Processes	19	negative regulation of immune effector process	19_GO:0002376 immune system process	-4.82044	16.1429	8.45592	30284	134	70	5	7.14286	3.07818	1524|5272|5788|10875|84868	CX3CR1|SERPINB9|PTPRC|FGL2|HAVCR2	-3.30547	0	83	0	0	-6.04763	54.0786
0	0	0	0	0	1	0	0	0	0	0	-4.5285	GO:0002704	M000001	1	0	GO Biological Processes	19	negative regulation of leukocyte mediated immunity	19_GO:0002376 immune system process	-4.5285	22.7699	9.14633	30284	76	70	4	5.71429	2.77431	1524|5272|5788|84868	CX3CR1|SERPINB9|PTPRC|HAVCR2	-3.05343	0	83	0	0	-6.04763	54.0786
0	0	0	0	0	1	0	0	0	0	0	-4.31463	GO:0002697	M000001	1	0	GO Biological Processes	19	regulation of immune effector process	19_GO:0002376 immune system process	-4.31463	7.31498	6.22728	30284	414	70	7	10	3.58569	942|1524|3561|5272|5788|10875|84868	CD86|CX3CR1|IL2RG|SERPINB9|PTPRC|FGL2|HAVCR2	-2.87796	0	83	0	0	-6.04763	54.0786
0	0	0	0	0	1	0	0	0	0	0	-4.06142	GO:0001910	M000001	1	0	GO Biological Processes	19	regulation of leukocyte mediated cytotoxicity	19_GO:0002376 immune system process	-4.06142	17.3051	7.86105	30284	100	70	4	5.71429	2.77431	1524|5272|5788|84868	CX3CR1|SERPINB9|PTPRC|HAVCR2	-2.68004	0	83	0	0	-6.04763	54.0786
0	0	0	0	0	1	0	0	0	0	0	-3.90097	GO:0031341	M000001	1	0	GO Biological Processes	19	regulation of cell killing	19_GO:0050789 regulation of biological process	-3.90097	15.7319	7.45048	30284	110	70	4	5.71429	2.77431	1524|5272|5788|84868	CX3CR1|SERPINB9|PTPRC|HAVCR2	-2.54793	0	83	0	0	-6.04763	54.0786
0	0	0	0	0	1	0	0	0	0	0	-3.33146	GO:0002707	M000001	1	0	GO Biological Processes	19	negative regulation of lymphocyte mediated immunity	19_GO:0002376 immune system process	-3.33146	19.9675	7.36835	30284	65	70	3	4.28571	2.42076	5272|5788|84868	SERPINB9|PTPRC|HAVCR2	-2.0874	0	83	0	0	-6.04763	54.0786
0	0	0	0	0	1	0	0	0	0	0	-3.23881	GO:0032102	M000001	1	0	GO Biological Processes	19	negative regulation of response to external stimulus	19_GO:0048519 negative regulation of biological process	-3.23881	5.83319	4.94386	30284	445	70	6	8.57143	3.34594	199|5272|5728|5788|10875|84868	AIF1|SERPINB9|PTEN|PTPRC|FGL2|HAVCR2	-2.01506	0	83	0	0	-6.04763	54.0786
0	0	0	0	0	1	0	0	0	0	0	-2.81141	GO:0050777	M000001	1	0	GO Biological Processes	19	negative regulation of immune response	19_GO:0002376 immune system process	-2.81141	8.08652	5.00746	30284	214	70	4	5.71429	2.77431	5272|5788|10875|84868	SERPINB9|PTPRC|FGL2|HAVCR2	-1.67139	0	83	0	0	-6.04763	54.0786
0	0	0	0	0	1	0	0	0	0	0	-2.50546	GO:0002703	M000001	1	0	GO Biological Processes	19	regulation of leukocyte mediated immunity	19_GO:0002376 immune system process	-2.78661	4.13877	4.11297	30284	260	197	7	3.5533	1.31894	563|1524|2625|5272|5788|7037|84868	AZGP1|CX3CR1|GATA3|SERPINB9|PTPRC|TFRC|HAVCR2	-1.43511	0	83	0	0	-6.04763	54.0786
0	0	0	0	0	1	0	0	0	0	0	-2.41867	GO:0002832	M000001	1	0	GO Biological Processes	19	negative regulation of response to biotic stimulus	19_GO:0048519 negative regulation of biological process	-2.71244	5.69355	4.42257	30284	135	197	5	2.53807	1.12056	5272|5468|10221|10875|84868	SERPINB9|PPARG|TRIB1|FGL2|HAVCR2	-1.37431	0	83	0	0	-6.04763	54.0786
0	0	0	0	0	1	0	0	0	0	0	-2.24544	GO:0031348	M000001	1	0	GO Biological Processes	19	negative regulation of defense response	19_GO:0048519 negative regulation of biological process	-2.24544	5.61855	3.92138	30284	308	70	4	5.71429	2.77431	5272|5788|10875|84868	SERPINB9|PTPRC|FGL2|HAVCR2	-1.19905	0	83	0	0	-6.04763	54.0786
0	0	0	0	0	1	0	0	0	0	0	-6.03243	WP5218	M000001	1	0	WikiPathways	27	Extrafollicular and follicular B cell activation by SARS CoV 2		-6.03243	28.4624	11.538	30284	76	70	5	7.14286	3.07818	1880|3687|5788|7852|9839	GPR183|ITGAX|PTPRC|CXCR4|ZEB2	-4.30277	0	84	1	1	-6.03243	28.4624
0	0	1	0	0	1	0	0	-2.94259	0	0	-6.00722	GO:0032103	M001001	2	0	GO Biological Processes	19	positive regulation of response to external stimulus	19_GO:0048518 positive regulation of biological process	-6.00722	7.35763	7.49341	30284	588	70	10	14.2857	4.18243	199|857|929|1524|2316|4332|5764|7852|84868|92610	AIF1|CAV1|CD14|CX3CR1|FLNA|MNDA|PTN|CXCR4|HAVCR2|TIFA	-4.28118	0	85	1	1	-6.00722	18.9749
0	0	0	0	0	1	0	0	0	0	0	-5.19892	GO:1903555	M000001	1	0	GO Biological Processes	19	regulation of tumor necrosis factor superfamily cytokine production	19_GO:0032501 multicellular organismal process	-5.19892	13.2437	8.27732	30284	196	70	6	8.57143	3.34594	929|942|1524|2214|5788|84868	CD14|CD86|CX3CR1|FCGR3A|PTPRC|HAVCR2	-3.61187	0	85	0	0	-6.00722	18.9749
0	0	0	0	0	1	0	0	0	0	0	-5.16176	GO:1903557	M000001	1	0	GO Biological Processes	19	positive regulation of tumor necrosis factor superfamily cytokine production	19_GO:0032501 multicellular organismal process	-5.16176	18.9749	9.255	30284	114	70	5	7.14286	3.07818	929|942|2214|5788|84868	CD14|CD86|FCGR3A|PTPRC|HAVCR2	-3.5843	0	85	0	0	-6.00722	18.9749
0	0	0	0	0	1	0	0	0	0	0	-4.08509	GO:0032680	M000001	1	0	GO Biological Processes	19	regulation of tumor necrosis factor production	19_GO:0032501 multicellular organismal process	-4.08509	11.3254	6.89022	30284	191	70	5	7.14286	3.07818	929|1524|2214|5788|84868	CD14|CX3CR1|FCGR3A|PTPRC|HAVCR2	-2.69951	0	85	0	0	-6.00722	18.9749
0	0	0	0	0	1	0	0	0	0	0	-3.90097	GO:0032760	M000001	1	0	GO Biological Processes	19	positive regulation of tumor necrosis factor production	19_GO:0032501 multicellular organismal process	-3.90097	15.7319	7.45048	30284	110	70	4	5.71429	2.77431	929|2214|5788|84868	CD14|FCGR3A|PTPRC|HAVCR2	-2.54793	0	85	0	0	-6.00722	18.9749
0	0	0	0	0	1	0	0	0	0	0	-3.43246	GO:0002831	M000001	1	0	GO Biological Processes	19	regulation of response to biotic stimulus	19_GO:0050896 response to stimulus	-3.43246	5.25764	4.96578	30284	576	70	7	10	3.58569	857|929|4332|5272|10875|84868|92610	CAV1|CD14|MNDA|SERPINB9|FGL2|HAVCR2|TIFA	-2.16708	0	85	0	0	-6.00722	18.9749
0	0	0	0	0	1	0	0	0	0	0	-3.17401	GO:0045089	M000001	1	0	GO Biological Processes	19	positive regulation of innate immune response	19_GO:0044419 biological process involved in interspecies interaction between organisms	-3.17401	7.18652	5.19202	30284	301	70	5	7.14286	3.07818	857|929|4332|84868|92610	CAV1|CD14|MNDA|HAVCR2|TIFA	-1.96267	0	85	0	0	-6.00722	18.9749
0	0	0	0	0	1	0	0	0	0	0	-3.15301	GO:0002218	M000001	1	0	GO Biological Processes	19	activation of innate immune response	19_GO:0044419 biological process involved in interspecies interaction between organisms	-3.15301	10.003	5.71598	30284	173	70	4	5.71429	2.77431	929|4332|84868|92610	CD14|MNDA|HAVCR2|TIFA	-1.94537	0	85	0	0	-6.00722	18.9749
0	0	0	0	0	1	0	0	0	0	0	-3.07092	hsa05152	M000001	1	0	KEGG Pathway	24	Tuberculosis		-3.07092	9.50832	5.54149	30284	182	70	4	5.71429	2.77431	929|2207|2214|3687	CD14|FCER1G|FCGR3A|ITGAX	-1.88031	0	85	0	0	-6.00722	18.9749
0	0	0	0	0	1	0	0	0	0	0	-3.05853	GO:0045088	M000001	1	0	GO Biological Processes	19	regulation of innate immune response	19_GO:0044419 biological process involved in interspecies interaction between organisms	-3.05853	5.38542	4.6715	30284	482	70	6	8.57143	3.34594	857|929|4332|5272|84868|92610	CAV1|CD14|MNDA|SERPINB9|HAVCR2|TIFA	-1.86995	0	85	0	0	-6.00722	18.9749
0	0	0	0	0	1	0	0	0	0	0	-2.9837	GO:0002833	M000001	1	0	GO Biological Processes	19	positive regulation of response to biotic stimulus	19_GO:0048518 positive regulation of biological process	-2.9837	6.51549	4.8639	30284	332	70	5	7.14286	3.07818	857|929|4332|84868|92610	CAV1|CD14|MNDA|HAVCR2|TIFA	-1.81067	0	85	0	0	-6.00722	18.9749
0	0	0	0	0	1	0	0	0	0	0	-2.48358	GO:0002221	M000001	1	0	GO Biological Processes	19	pattern recognition receptor signaling pathway	19_GO:0044419 biological process involved in interspecies interaction between organisms	-2.48358	10.1397	4.98765	30284	128	70	3	4.28571	2.42076	929|84868|92610	CD14|HAVCR2|TIFA	-1.39931	0	85	0	0	-6.00722	18.9749
0	0	0	0	0	1	0	0	0	0	0	-2.47408	GO:0032479	M000001	1	0	GO Biological Processes	19	regulation of type I interferon production	19_GO:0032501 multicellular organismal process	-2.47408	10.0611	4.96412	30284	129	70	3	4.28571	2.42076	929|2597|84868	CD14|GAPDH|HAVCR2	-1.39257	0	85	0	0	-6.00722	18.9749
0	0	0	0	0	1	0	0	0	0	0	-2.41472	GO:0031349	M000001	1	0	GO Biological Processes	19	positive regulation of defense response	19_GO:0048518 positive regulation of biological process	-2.41472	4.81769	3.92288	30284	449	70	5	7.14286	3.07818	857|929|4332|84868|92610	CAV1|CD14|MNDA|HAVCR2|TIFA	-1.34434	0	85	0	0	-6.00722	18.9749
0	0	0	0	0	1	0	0	0	0	0	-2.31547	GO:0002758	M000001	1	0	GO Biological Processes	19	innate immune response-activating signaling pathway	19_GO:0044419 biological process involved in interspecies interaction between organisms	-2.31547	8.82915	4.58003	30284	147	70	3	4.28571	2.42076	929|84868|92610	CD14|HAVCR2|TIFA	-1.25933	0	85	0	0	-6.00722	18.9749
0	0	0	0	0	1	0	0	0	0	0	-2.10004	GO:0071478	M000001	1	0	GO Biological Processes	19	cellular response to radiation	19_GO:0050896 response to stimulus	-2.97247	5.24066	4.56553	30284	176	197	6	3.04569	1.22431	4193|4311|4313|6422|6591|7076	MDM2|MME|MMP2|SFRP1|SNAI2|TIMP1	-1.59618	0	87	0	0	-5.93536	7.83317
0	0	0	1	0	1	0	0	0	-2.72327	0	-3.74149	WP4541	M000101	2	0	WikiPathways	27	Hippo Merlin signaling dysregulation		-5.8744	10.1637	8.17277	30284	121	197	8	4.06091	1.4063	595|960|999|1001|1956|2264|3655|3687	CCND1|CD44|CDH1|CDH3|EGFR|FGFR4|ITGA6|ITGAX	-4.0128	0	88	1	1	-5.8744	10.1637
0	0	1	0	0	1	0	0	-2.41825	0	0	-2.68365	hsa04810	M001001	2	0	KEGG Pathway	24	Regulation of actin cytoskeleton		-3.82926	5.30089	5.32119	30284	232	197	8	4.06091	1.4063	1956|2264|3655|3687|4638|5290|6387|7852	EGFR|FGFR4|ITGA6|ITGAX|MYLK|PIK3CA|CXCL12|CXCR4	-2.32679	0	88	0	0	-5.8744	10.1637
0	0	0	0	1	0	0	0	0	0	-5.83722	0	GO:0007096	M000010	1	0	GO Biological Processes	19	regulation of exit from mitosis	19_GO:0050789 regulation of biological process	-5.83722	133.606	19.888	30284	20	34	3	8.82353	4.86433	332|11065|54443	BIRC5|UBE2C|ANLN	-4.13939	0	89	1	1	-5.83722	133.606
0	0	0	0	1	0	0	0	0	0	-3.86187	0	GO:0000281	M000010	1	0	GO Biological Processes	19	mitotic cytokinesis	19_GO:0009987 cellular process	-3.86187	30.0238	9.19301	30284	89	34	3	8.82353	4.86433	332|54443|55165	BIRC5|ANLN|CEP55	-2.51546	0	89	0	0	-5.83722	133.606
0	0	0	0	1	0	0	0	0	0	-3.51124	0	GO:0061640	M000010	1	0	GO Biological Processes	19	cytoskeleton-dependent cytokinesis	19_GO:0009987 cellular process	-3.51124	22.8386	7.93466	30284	117	34	3	8.82353	4.86433	332|54443|55165	BIRC5|ANLN|CEP55	-2.23178	0	89	0	0	-5.83722	133.606
0	0	0	0	1	0	0	0	0	0	-3.48963	0	GO:0000910	M000010	1	0	GO Biological Processes	19	cytokinesis	19_GO:0009987 cellular process	-3.48963	22.4548	7.8618	30284	119	34	3	8.82353	4.86433	332|54443|55165	BIRC5|ANLN|CEP55	-2.21214	0	89	0	0	-5.83722	133.606
0	0	1	0	0	1	0	0	-2.82986	0	0	-3.22014	GO:0030307	M001001	2	0	GO Biological Processes	19	positive regulation of cell growth	19_GO:0040007 growth	-5.81661	8.33454	7.66755	30284	166	197	9	4.56853	1.48765	1956|2064|3872|6279|6387|6422|7422|7852|58191	EGFR|ERBB2|KRT17|S100A8|CXCL12|SFRP1|VEGFA|CXCR4|CXCL16	-3.96485	0	90	1	1	-5.81661	8.33454
0	0	1	0	0	1	0	0	-2.02388	0	0	-4.05932	GO:0040008	M001001	2	0	GO Biological Processes	19	regulation of growth	19_GO:0040007 growth	-5.50517	3.99288	6.07266	30284	616	197	16	8.12183	1.94626	367|999|1956|2017|2064|2296|3872|5290|5728|6279|6387|6422|7422|7852|10409|58191	AR|CDH1|EGFR|CTTN|ERBB2|FOXC1|KRT17|PIK3CA|PTEN|S100A8|CXCL12|SFRP1|VEGFA|CXCR4|BASP1|CXCL16	-3.7277	0	90	0	0	-5.81661	8.33454
0	0	1	0	0	1	0	0	-2.28517	0	0	-3.47028	GO:0045927	M001001	2	0	GO Biological Processes	19	positive regulation of growth	19_GO:0040007 growth	-5.07822	5.93536	6.45462	30284	259	197	10	5.07614	1.56394	1956|2064|3872|6279|6387|6422|7422|7852|10409|58191	EGFR|ERBB2|KRT17|S100A8|CXCL12|SFRP1|VEGFA|CXCR4|BASP1|CXCL16	-3.38716	0	90	0	0	-5.81661	8.33454
0	0	0	0	0	1	0	0	0	0	0	-3.01299	GO:0048638	M000001	1	0	GO Biological Processes	19	regulation of developmental growth	19_GO:0040007 growth	-4.21489	4.7011	5.44501	30284	327	197	10	5.07614	1.56394	367|999|2017|2296|5290|5728|6387|7422|7852|10409	AR|CDH1|CTTN|FOXC1|PIK3CA|PTEN|CXCL12|VEGFA|CXCR4|BASP1	-2.65687	0	90	0	0	-5.81661	8.33454
0	0	0	0	0	1	0	0	0	0	0	-5.79011	WP4298	M000001	1	0	WikiPathways	27	Acute viral myocarditis		-5.79011	25.4487	10.8646	30284	85	70	5	7.14286	3.07818	199|595|857|920|7852	AIF1|CCND1|CAV1|CD4|CXCR4	-4.09792	0	91	1	1	-5.79011	29.4974
0	0	0	0	0	1	0	0	0	0	0	-4.44018	GO:0044403	M000001	1	0	GO Biological Processes	19	biological process involved in symbiotic interaction	19_GO:0044419 biological process involved in interspecies interaction between organisms	-4.44018	9.72199	6.8902	30284	267	70	6	8.57143	3.34594	857|920|942|1524|2597|7852	CAV1|CD4|CD86|CX3CR1|GAPDH|CXCR4	-2.9818	0	91	0	0	-5.79011	29.4974
0	0	0	0	0	1	0	0	0	0	0	-3.84109	GO:0044409	M000001	1	0	GO Biological Processes	19	symbiont entry into host	19_GO:0044419 biological process involved in interspecies interaction between organisms	-3.98072	8.09084	6.1377	30284	114	197	6	3.04569	1.22431	857|920|942|1956|7037|7852	CAV1|CD4|CD86|EGFR|TFRC|CXCR4	-2.4635	0	91	0	0	-5.79011	29.4974
0	0	0	0	0	1	0	0	0	0	0	-3.84109	GO:0046718	M000001	1	0	GO Biological Processes	19	symbiont entry into host cell	19_GO:0016032 viral process	-3.98072	8.09084	6.1377	30284	114	197	6	3.04569	1.22431	857|920|942|1956|7037|7852	CAV1|CD4|CD86|EGFR|TFRC|CXCR4	-2.4635	0	91	0	0	-5.79011	29.4974
0	0	0	0	0	1	0	0	0	0	0	-3.83464	GO:0031295	M000001	1	0	GO Biological Processes	19	T cell costimulation	19_GO:0002376 immune system process	-3.83464	29.4974	9.10511	30284	44	70	3	4.28571	2.42076	857|942|5290	CAV1|CD86|PIK3CA	-2.49377	0	91	0	0	-5.79011	29.4974
0	0	0	0	0	1	0	0	0	0	0	-3.8054	GO:0031294	M000001	1	0	GO Biological Processes	19	lymphocyte costimulation	19_GO:0002376 immune system process	-3.8054	28.8419	8.99634	30284	45	70	3	4.28571	2.42076	857|942|5290	CAV1|CD86|PIK3CA	-2.47196	0	91	0	0	-5.79011	29.4974
0	0	0	0	0	1	0	0	0	0	0	-3.5968	WP366	M000001	1	0	WikiPathways	27	TGF beta signaling pathway		-3.5968	13.11	6.71144	30284	132	70	4	5.71429	2.77431	595|857|1278|9839	CCND1|CAV1|COL1A2|ZEB2	-2.30457	0	91	0	0	-5.79011	29.4974
0	0	0	0	0	1	0	0	0	0	0	-3.52249	GO:0030857	M000001	1	0	GO Biological Processes	19	negative regulation of epithelial cell differentiation	19_GO:0032502 developmental process	-3.52249	23.1765	7.99516	30284	56	70	3	4.28571	2.42076	595|857|8626	CCND1|CAV1|TP63	-2.24086	0	91	0	0	-5.79011	29.4974
0	0	0	0	0	1	0	0	0	0	0	-3.43388	R-HSA-388841	M000001	1	0	Reactome Gene Sets	6	Regulation of T cell activation by CD28 family		-3.43388	21.6314	7.69969	30284	60	70	3	4.28571	2.42076	920|942|5290	CD4|CD86|PIK3CA	-2.16766	0	91	0	0	-5.79011	29.4974
0	0	0	0	0	1	0	0	0	0	0	-3.37497	GO:0051701	M000001	1	0	GO Biological Processes	19	biological process involved in interaction with host	19_GO:0044419 biological process involved in interspecies interaction between organisms	-3.37497	11.4604	6.20238	30284	151	70	4	5.71429	2.77431	857|920|942|7852	CAV1|CD4|CD86|CXCR4	-2.1212	0	91	0	0	-5.79011	29.4974
0	0	0	0	0	1	0	0	0	0	0	-3.23703	hsa05416	M000001	1	0	KEGG Pathway	24	Viral myocarditis		-3.23703	18.5412	7.07211	30284	70	70	3	4.28571	2.42076	595|857|942	CCND1|CAV1|CD86	-2.0148	0	91	0	0	-5.79011	29.4974
0	0	0	0	0	1	0	0	0	0	0	-3.07982	GO:0019058	M000001	1	0	GO Biological Processes	19	viral life cycle	19_GO:0016032 viral process	-3.07982	9.56085	5.56027	30284	181	70	4	5.71429	2.77431	857|920|942|7852	CAV1|CD4|CD86|CXCR4	-1.88771	0	91	0	0	-5.79011	29.4974
0	0	0	0	0	1	0	0	0	0	0	-2.68117	hsa04620	M000001	1	0	KEGG Pathway	24	Toll-like receptor signaling pathway		-2.68117	11.9072	5.49095	30284	109	70	3	4.28571	2.42076	929|942|5290	CD14|CD86|PIK3CA	-1.56324	0	91	0	0	-5.79011	29.4974
0	0	0	0	0	1	0	0	0	0	0	-2.47009	GO:0016032	M000001	1	0	GO Biological Processes	19	viral process	19_GO:0016032 viral process	-2.47009	6.50569	4.34116	30284	266	70	4	5.71429	2.77431	857|920|942|7852	CAV1|CD4|CD86|CXCR4	-1.38885	0	91	0	0	-5.79011	29.4974
0	0	1	0	0	1	0	0	-2.91528	0	0	-5.78721	GO:0007009	M001001	2	0	GO Biological Processes	19	plasma membrane organization	19_GO:0009987 cellular process	-5.78721	16.7469	9.46048	30284	155	70	6	8.57143	3.34594	857|1289|1291|5728|5788|7852	CAV1|COL5A1|COL6A1|PTEN|PTPRC|CXCR4	-4.09615	0	92	1	1	-5.78721	44.7547
0	0	0	0	0	1	0	0	0	0	0	-3.97916	GO:0060070	M000001	1	0	GO Biological Processes	19	canonical Wnt signaling pathway	19_GO:0050896 response to stimulus	-5.2302	10.2484	7.6816	30284	105	197	7	3.5533	1.31894	857|1291|2625|3728|5728|6422|6424	CAV1|COL6A1|GATA3|JUP|PTEN|SFRP1|SFRP4	-3.51021	0	92	0	0	-5.78721	44.7547
0	0	0	0	0	1	0	0	0	0	0	-4.66987	GO:0043491	M000001	1	0	GO Biological Processes	19	phosphatidylinositol 3-kinase/protein kinase B signal transduction	19_GO:0050896 response to stimulus	-5.18627	13.1765	8.25298	30284	70	197	6	3.04569	1.22431	1291|2064|2214|2625|5290|5728	COL6A1|ERBB2|FCGR3A|GATA3|PIK3CA|PTEN	-3.47809	0	92	0	0	-5.78721	44.7547
0	0	1	0	0	1	0	0	-2.17478	0	0	-3.288	GO:0016055	M001001	2	0	GO Biological Processes	19	Wnt signaling pathway	19_GO:0050896 response to stimulus	-4.73201	5.41288	6.04594	30284	284	197	10	5.07614	1.56394	595|857|1291|2625|3728|5728|6422|6424|9968|100133941	CCND1|CAV1|COL6A1|GATA3|JUP|PTEN|SFRP1|SFRP4|MED12|CD24	-3.0876	0	92	0	0	-5.78721	44.7547
0	0	0	0	0	1	0	0	0	0	0	-4.38311	GO:0031579	M000001	1	0	GO Biological Processes	19	membrane raft organization	19_GO:0009987 cellular process	-4.38311	44.7547	11.3467	30284	29	70	3	4.28571	2.42076	857|1291|5788	CAV1|COL6A1|PTPRC	-2.93444	0	92	0	0	-5.78721	44.7547
0	0	0	0	0	1	0	0	0	0	0	-3.39187	GO:0071709	M000001	1	0	GO Biological Processes	19	membrane assembly	19_GO:0009987 cellular process	-3.39187	20.9336	7.5625	30284	62	70	3	4.28571	2.42076	857|1291|5728	CAV1|COL6A1|PTEN	-2.13482	0	92	0	0	-5.78721	44.7547
0	0	1	0	0	1	0	0	-2.44792	0	0	-2.71823	GO:0061024	M001001	2	0	GO Biological Processes	19	membrane organization	19_GO:0009987 cellular process	-3.29081	2.81697	4.11603	30284	764	197	14	7.1066	1.83059	199|857|928|1289|1291|1956|5728|5788|7852|10430|10802|27095|55165|100133941	AIF1|CAV1|CD9|COL5A1|COL6A1|EGFR|PTEN|PTPRC|CXCR4|TMEM147|SEC24A|TRAPPC3|CEP55|CD24	-1.86339	0	92	0	0	-5.78721	44.7547
0	0	0	0	0	1	0	0	0	0	0	-3.28018	GO:0060538	M000001	1	0	GO Biological Processes	19	skeletal muscle organ development	19_GO:0032502 developmental process	-3.28018	10.8157	5.99197	30284	160	70	4	5.71429	2.77431	857|1291|6840|10409	CAV1|COL6A1|SVIL|BASP1	-2.04856	0	92	0	0	-5.78721	44.7547
0	0	0	0	0	1	0	0	0	0	0	-3.25533	GO:0044091	M000001	1	0	GO Biological Processes	19	membrane biogenesis	19_GO:0009987 cellular process	-3.25533	18.8099	7.12886	30284	69	70	3	4.28571	2.42076	857|1291|5728	CAV1|COL6A1|PTEN	-2.02967	0	92	0	0	-5.78721	44.7547
0	0	0	0	0	1	0	0	0	0	0	-2.96636	GO:0014706	M000001	1	0	GO Biological Processes	19	striated muscle tissue development	19_GO:0032502 developmental process	-2.96636	6.45714	4.83438	30284	335	70	5	7.14286	3.07818	857|1291|1832|2296|6840	CAV1|COL6A1|DSP|FOXC1|SVIL	-1.79536	0	92	0	0	-5.78721	44.7547
0	0	0	0	0	1	0	0	0	0	0	-2.46465	GO:0042552	M000001	1	0	GO Biological Processes	19	myelination	19_GO:0032502 developmental process	-2.78435	5.91253	4.54201	30284	130	197	5	2.53807	1.12056	928|1291|2064|5728|7852	CD9|COL6A1|ERBB2|PTEN|CXCR4	-1.43387	0	92	0	0	-5.78721	44.7547
0	0	0	0	0	1	0	0	0	0	0	-2.44603	GO:0007272	M000001	1	0	GO Biological Processes	19	ensheathment of neurons	19_GO:0032502 developmental process	-2.7552	5.82295	4.4935	30284	132	197	5	2.53807	1.12056	928|1291|2064|5728|7852	CD9|COL6A1|ERBB2|PTEN|CXCR4	-1.4093	0	92	0	0	-5.78721	44.7547
0	0	0	0	0	1	0	0	0	0	0	-2.44603	GO:0008366	M000001	1	0	GO Biological Processes	19	axon ensheathment	19_GO:0032502 developmental process	-2.7552	5.82295	4.4935	30284	132	197	5	2.53807	1.12056	928|1291|2064|5728|7852	CD9|COL6A1|ERBB2|PTEN|CXCR4	-1.4093	0	92	0	0	-5.78721	44.7547
0	0	0	0	0	1	0	0	0	0	0	-2.32372	GO:0007519	M000001	1	0	GO Biological Processes	19	skeletal muscle tissue development	19_GO:0032502 developmental process	-2.32372	8.88963	4.5996	30284	146	70	3	4.28571	2.42076	857|1291|6840	CAV1|COL6A1|SVIL	-1.26654	0	92	0	0	-5.78721	44.7547
0	0	1	1	0	0	0	0	-2.72764	-2.68343	0	0	GO:0043009	M001100	2	0	GO Biological Processes	19	chordate embryonic development	19_GO:0032502 developmental process	-5.78668	3.97164	6.23614	30284	658	197	17	8.62944	2.00061	367|891|1277|1281|1956|2296|2625|3856|3880|5914|6241|6385|6422|7020|7422|9968|54855	AR|CCNB1|COL1A1|COL3A1|EGFR|FOXC1|GATA3|KRT8|KRT19|RARA|RRM2|SDC4|SFRP1|TFAP2A|VEGFA|MED12|TENT5C	-3.93815	0	93	1	1	-5.78668	5.55636
0	0	1	1	0	0	0	0	-2.66546	-2.61221	0	0	GO:0009792	M001100	2	0	GO Biological Processes	19	embryo development ending in birth or egg hatching	19_GO:0032502 developmental process	-5.59507	3.84315	6.06767	30284	680	197	17	8.62944	2.00061	367|891|1277|1281|1956|2296|2625|3856|3880|5914|6241|6385|6422|7020|7422|9968|54855	AR|CCNB1|COL1A1|COL3A1|EGFR|FOXC1|GATA3|KRT8|KRT19|RARA|RRM2|SDC4|SFRP1|TFAP2A|VEGFA|MED12|TENT5C	-3.79661	0	93	0	0	-5.78668	5.55636
0	0	0	1	1	0	0	0	0	-2.91014	-2.00426	0	GO:0001701	M000110	2	0	GO Biological Processes	19	in utero embryonic development	19_GO:0032502 developmental process	-4.19632	4.25941	5.28976	30284	397	197	11	5.58376	1.63589	367|891|1281|1956|2296|2625|3856|3880|6241|7422|54855	AR|CCNB1|COL3A1|EGFR|FOXC1|GATA3|KRT8|KRT19|RRM2|VEGFA|TENT5C	-2.64397	0	93	0	0	-5.78668	5.55636
0	0	1	1	0	0	0	0	-2.4873	-2.65529	0	0	GO:0048568	M001100	2	0	GO Biological Processes	19	embryonic organ development	19_GO:0032502 developmental process	-3.68653	3.72464	4.73318	30284	454	197	11	5.58376	1.63589	220|1956|2296|2625|3856|3880|5914|6678|7020|7422|9968	ALDH1A3|EGFR|FOXC1|GATA3|KRT8|KRT19|RARA|SPARC|TFAP2A|VEGFA|MED12	-2.20105	0	93	0	0	-5.78668	5.55636
0	0	1	0	0	0	0	0	-2.82986	0	0	0	GO:0048592	M001000	1	0	GO Biological Processes	19	eye morphogenesis	19_GO:0032502 developmental process	-3.10401	5.55636	4.76323	30284	166	197	6	3.04569	1.22431	220|1289|6659|7020|7070|7422	ALDH1A3|COL5A1|SOX4|TFAP2A|THY1|VEGFA	-1.70509	0	93	0	0	-5.78668	5.55636
0	0	0	0	0	1	0	0	0	0	0	-2.96223	WP2840	M000001	1	0	WikiPathways	27	Hair follicle development cytodifferentiation stage 3 of 3		-5.77792	12.3687	8.59278	30284	87	197	7	3.5533	1.31894	1824|1956|2625|3880|6275|6422|8626	DSC2|EGFR|GATA3|KRT19|S100A4|SFRP1|TP63	-3.93693	0	94	1	1	-5.77792	12.3687
0	0	0	1	0	0	0	0	0	-3.63112	0	0	GO:0097305	M000100	1	0	GO Biological Processes	19	response to alcohol	19_GO:0050896 response to stimulus	-5.67989	6.14904	6.9408	30284	275	197	11	5.58376	1.63589	929|999|2625|3728|4193|5788|5914|6279|6422|7298|8644	CD14|CDH1|GATA3|JUP|MDM2|PTPRC|RARA|S100A8|SFRP1|TYMS|AKR1C3	-3.86537	0	95	1	1	-5.67989	9.37353
0	0	0	0	0	1	0	0	0	0	0	-3.03669	M115	M000001	1	0	Canonical Pathways	11	PID REG GR PATHWAY		-3.69619	9.37353	6.14385	30284	82	197	5	2.53807	1.12056	2625|3852|3861|3872|4193	GATA3|KRT5|KRT14|KRT17|MDM2	-2.20868	0	95	0	0	-5.67989	9.37353
0	0	0	0	0	1	0	0	0	0	0	-2.34882	GO:0010212	M000001	1	0	GO Biological Processes	19	response to ionizing radiation	19_GO:0050896 response to stimulus	-2.60366	5.37503	4.24339	30284	143	197	5	2.53807	1.12056	2625|4193|5788|6422|6591	GATA3|MDM2|PTPRC|SFRP1|SNAI2	-1.27897	0	95	0	0	-5.67989	9.37353
0	0	0	1	0	0	0	0	0	-2.25208	0	0	R-HSA-5689880	M000100	1	0	Reactome Gene Sets	6	Ub-specific processing proteases		-2.25208	8.36729	4.42881	30284	178	61	3	4.91803	2.76873	367|2625|4193	AR|GATA3|MDM2	-1.20476	0	95	0	0	-5.67989	9.37353
0	0	0	0	0	1	0	0	0	0	0	-3.63494	WP4217	M000001	1	0	WikiPathways	27	Ebola virus infection in host		-5.6647	9.53339	7.85923	30284	129	197	8	4.06091	1.4063	857|1956|2316|2317|3655|5290|7020|84868	CAV1|EGFR|FLNA|FLNB|ITGA6|PIK3CA|TFAP2A|HAVCR2	-3.85463	0	96	1	1	-5.6647	9.53339
0	0	0	1	0	0	0	0	0	-5.20693	0	0	GO:0042574	M000100	1	0	GO Biological Processes	19	retinal metabolic process	19_GO:0009987 cellular process	-5.20693	82.7432	15.585	30284	18	61	3	4.91803	2.76873	220|1645|8644	ALDH1A3|AKR1C1|AKR1C3	-3.61812	0	98	0	0	-5.62224	113.85
0	0	0	1	0	0	0	0	0	-4.61438	0	0	GO:0001523	M000100	1	0	GO Biological Processes	19	retinoid metabolic process	19_GO:0009987 cellular process	-4.61438	23.9257	9.39609	30284	83	61	4	6.55738	3.16937	125|220|1645|8644	ADH1B|ALDH1A3|AKR1C1|AKR1C3	-3.12548	0	98	0	0	-5.62224	113.85
0	0	0	1	0	0	0	0	0	-4.51419	0	0	GO:0016101	M000100	1	0	GO Biological Processes	19	diterpenoid metabolic process	19_GO:0009987 cellular process	-4.51419	22.5663	9.10203	30284	88	61	4	6.55738	3.16937	125|220|1645|8644	ADH1B|ALDH1A3|AKR1C1|AKR1C3	-3.0398	0	98	0	0	-5.62224	113.85
0	0	0	1	0	0	0	0	0	-4.41982	0	0	GO:0034308	M000100	1	0	GO Biological Processes	19	primary alcohol metabolic process	19_GO:0009987 cellular process	-4.41982	21.3531	8.83138	30284	93	61	4	6.55738	3.16937	125|220|1645|8644	ADH1B|ALDH1A3|AKR1C1|AKR1C3	-2.96559	0	98	0	0	-5.62224	113.85
0	0	0	1	0	0	0	0	0	-4.39014	0	0	GO:0006066	M000100	1	0	GO Biological Processes	19	alcohol metabolic process	19_GO:0009987 cellular process	-4.39014	9.48648	6.79117	30284	314	61	6	9.83607	3.81296	125|220|341|1645|6713|8644	ADH1B|ALDH1A3|APOC1|AKR1C1|SQLE|AKR1C3	-2.93826	0	98	0	0	-5.62224	113.85
0	0	0	1	0	0	0	0	0	-4.36921	0	0	GO:1901615	M000100	1	0	GO Biological Processes	19	organic hydroxy compound metabolic process	19_GO:0009987 cellular process	-4.36921	7.42567	6.29379	30284	468	61	7	11.4754	4.08085	125|220|341|1645|2625|6713|8644	ADH1B|ALDH1A3|APOC1|AKR1C1|GATA3|SQLE|AKR1C3	-2.9231	0	98	0	0	-5.62224	113.85
0	0	0	1	0	0	0	0	0	-4.31339	0	0	GO:0006721	M000100	1	0	GO Biological Processes	19	terpenoid metabolic process	19_GO:0009987 cellular process	-4.31339	20.059	8.53329	30284	99	61	4	6.55738	3.16937	125|220|1645|8644	ADH1B|ALDH1A3|AKR1C1|AKR1C3	-2.87789	0	98	0	0	-5.62224	113.85
0	0	0	1	0	0	0	0	0	-4.22779	0	0	GO:0042445	M000100	1	0	GO Biological Processes	19	hormone metabolic process	19_GO:0065007 biological regulation	-4.22779	12.1088	7.16979	30284	205	61	5	8.19672	3.51224	125|220|1645|4311|8644	ADH1B|ALDH1A3|AKR1C1|MME|AKR1C3	-2.81181	0	98	0	0	-5.62224	113.85
0	0	0	1	0	0	0	0	0	-3.98819	0	0	GO:0006720	M000100	1	0	GO Biological Processes	19	isoprenoid metabolic process	19_GO:0009987 cellular process	-3.98819	16.5486	7.66715	30284	120	61	4	6.55738	3.16937	125|220|1645|8644	ADH1B|ALDH1A3|AKR1C1|AKR1C3	-2.62118	0	98	0	0	-5.62224	113.85
0	0	0	1	0	0	0	0	0	-3.79541	0	0	GO:0042572	M000100	1	0	GO Biological Processes	19	retinol metabolic process	19_GO:0065007 biological regulation	-3.79541	28.6419	8.96254	30284	52	61	3	4.91803	2.76873	125|220|8644	ADH1B|ALDH1A3|AKR1C3	-2.46295	0	98	0	0	-5.62224	113.85
0	0	0	1	0	0	0	0	0	-3.63792	0	0	GO:0120254	M000100	1	0	GO Biological Processes	19	olefinic compound metabolic process	19_GO:0009987 cellular process	-3.63792	13.4178	6.80344	30284	148	61	4	6.55738	3.16937	125|220|1645|8644	ADH1B|ALDH1A3|AKR1C1|AKR1C3	-2.33529	0	98	0	0	-5.62224	113.85
0	0	0	1	0	0	0	0	0	-3.6105	0	0	GO:0070542	M000100	1	0	GO Biological Processes	19	response to fatty acid	19_GO:0050896 response to stimulus	-3.6105	24.823	8.29833	30284	60	61	3	4.91803	2.76873	1645|6319|8644	AKR1C1|SCD|AKR1C3	-2.31333	0	98	0	0	-5.62224	113.85
0	0	0	1	0	0	0	0	0	-3.48802	0	0	WP4313	M000100	1	0	WikiPathways	27	Ferroptosis		-3.48802	22.5663	7.87972	30284	66	61	3	4.91803	2.76873	1491|1645|8644	CTH|AKR1C1|AKR1C3	-2.21214	0	98	0	0	-5.62224	113.85
0	0	0	1	0	0	0	0	0	-3.44978	0	0	GO:0006081	M000100	1	0	GO Biological Processes	19	aldehyde metabolic process	19_GO:0009987 cellular process	-3.44978	21.9026	7.75232	30284	68	61	3	4.91803	2.76873	220|1645|8644	ALDH1A3|AKR1C1|AKR1C3	-2.18103	0	98	0	0	-5.62224	113.85
0	0	0	1	0	0	0	0	0	-2.91178	0	0	GO:0033559	M000100	1	0	GO Biological Processes	19	unsaturated fatty acid metabolic process	19_GO:0009987 cellular process	-2.91178	14.3209	6.11346	30284	104	61	3	4.91803	2.76873	1645|6319|8644	AKR1C1|SCD|AKR1C3	-1.75344	0	98	0	0	-5.62224	113.85
0	0	0	1	0	0	0	0	0	-2.74248	0	0	GO:0008202	M000100	1	0	GO Biological Processes	19	steroid metabolic process	19_GO:0009987 cellular process	-2.74248	7.72699	4.86549	30284	257	61	4	6.55738	3.16937	341|1645|6713|8644	APOC1|AKR1C1|SQLE|AKR1C3	-1.61517	0	98	0	0	-5.62224	113.85
0	0	0	1	0	0	0	0	0	-2.27251	0	0	GO:1901617	M000100	1	0	GO Biological Processes	19	organic hydroxy compound biosynthetic process	19_GO:0009987 cellular process	-2.27251	8.51073	4.4766	30284	175	61	3	4.91803	2.76873	2625|6713|8644	GATA3|SQLE|AKR1C3	-1.22357	0	98	0	0	-5.62224	113.85
0	0	0	0	0	1	0	0	0	0	0	-4.16608	GO:0007229	M000001	1	0	GO Biological Processes	19	integrin-mediated signaling pathway	19_GO:0050896 response to stimulus	-5.55111	11.4477	8.20909	30284	94	197	7	3.5533	1.31894	667|1281|3655|3687|5764|7070|8754	DST|COL3A1|ITGA6|ITGAX|PTN|THY1|ADAM9	-3.76397	0	99	1	1	-5.55111	11.4477
0	0	0	0	0	1	0	0	0	0	0	-2.40079	GO:0007160	M000001	1	0	GO Biological Processes	19	cell-matrix adhesion	19_GO:0009987 cellular process	-5.46916	8.97669	7.57189	30284	137	197	8	4.06091	1.4063	960|1281|2017|3655|3687|7070|8754|27076	CD44|COL3A1|CTTN|ITGA6|ITGAX|THY1|ADAM9|LYPD3	-3.70248	0	99	0	0	-5.55111	11.4477
0	0	0	0	0	1	0	0	0	0	0	-3.05328	GO:0031589	M000001	1	0	GO Biological Processes	19	cell-substrate adhesion	19_GO:0009987 cellular process	-5.44828	7.5192	7.17733	30284	184	197	9	4.56853	1.48765	960|1281|2017|3655|3687|7070|8754|9404|27076	CD44|COL3A1|CTTN|ITGA6|ITGAX|THY1|ADAM9|LPXN|LYPD3	-3.69083	0	99	0	0	-5.55111	11.4477
0	0	0	0	0	1	0	0	0	0	0	-5.48415	GO:0042303	M000001	1	0	GO Biological Processes	19	molting cycle	19_GO:0032501 multicellular organismal process	-5.48415	22.0729	10.0572	30284	98	70	5	7.14286	3.07818	1001|1291|3861|3872|8626	CDH3|COL6A1|KRT14|KRT17|TP63	-3.85066	0	100	1	1	-5.48415	22.0729
0	0	0	0	0	1	0	0	0	0	0	-5.48415	GO:0042633	M000001	1	0	GO Biological Processes	19	hair cycle	19_GO:0032501 multicellular organismal process	-5.48415	22.0729	10.0572	30284	98	70	5	7.14286	3.07818	1001|1291|3861|3872|8626	CDH3|COL6A1|KRT14|KRT17|TP63	-3.85066	0	100	0	0	-5.48415	22.0729
0	0	0	0	0	1	0	0	0	0	0	-4.31721	GO:0022404	M000001	1	0	GO Biological Processes	19	molting cycle process	19_GO:0032501 multicellular organismal process	-4.31721	20.1223	8.54759	30284	86	70	4	5.71429	2.77431	1001|1291|3872|8626	CDH3|COL6A1|KRT17|TP63	-2.87992	0	100	0	0	-5.48415	22.0729
0	0	0	0	0	1	0	0	0	0	0	-4.31721	GO:0022405	M000001	1	0	GO Biological Processes	19	hair cycle process	19_GO:0032501 multicellular organismal process	-4.31721	20.1223	8.54759	30284	86	70	4	5.71429	2.77431	1001|1291|3872|8626	CDH3|COL6A1|KRT17|TP63	-2.87992	0	100	0	0	-5.48415	22.0729
0	0	0	0	0	1	0	0	0	0	0	-3.20123	GO:0006090	M000001	1	0	GO Biological Processes	19	pyruvate metabolic process	19_GO:0009987 cellular process	-3.20123	18.0262	6.96207	30284	72	70	3	4.28571	2.42076	1291|2597|3945	COL6A1|GAPDH|LDHB	-1.98354	0	100	0	0	-5.48415	22.0729
0	0	0	0	0	1	0	0	0	0	0	-3.03669	GO:0001942	M000001	1	0	GO Biological Processes	19	hair follicle development	19_GO:0032502 developmental process	-3.03669	15.8279	6.47161	30284	82	70	3	4.28571	2.42076	1291|3872|8626	COL6A1|KRT17|TP63	-1.85267	0	100	0	0	-5.48415	22.0729
0	0	0	0	0	1	0	0	0	0	0	-2.9193	M5939	M000001	1	0	Hallmark Gene Sets	23	HALLMARK P53 PATHWAY		-2.9193	8.65257	5.22636	30284	200	70	4	5.71429	2.77431	3872|3945|6275|8626	KRT17|LDHB|S100A4|TP63	-1.75998	0	100	0	0	-5.48415	22.0729
0	0	0	0	0	1	0	0	0	0	0	-2.61501	GO:0051402	M000001	1	0	GO Biological Processes	19	neuron apoptotic process	19_GO:0009987 cellular process	-2.61501	11.286	5.31934	30284	115	70	3	4.28571	2.42076	1291|2597|8626	COL6A1|GAPDH|TP63	-1.5083	0	100	0	0	-5.48415	22.0729
0	0	0	0	0	1	0	0	0	0	0	-2.58331	GO:0098773	M000001	1	0	GO Biological Processes	19	skin epidermis development	19_GO:0032502 developmental process	-2.58331	10.999	5.23823	30284	118	70	3	4.28571	2.42076	1291|3872|8626	COL6A1|KRT17|TP63	-1.48095	0	100	0	0	-5.48415	22.0729
0	0	0	0	0	1	0	0	0	0	0	-2.55246	GO:0019362	M000001	1	0	GO Biological Processes	19	pyridine nucleotide metabolic process	19_GO:0009987 cellular process	-2.55246	10.7263	5.15999	30284	121	70	3	4.28571	2.42076	1291|2597|3945	COL6A1|GAPDH|LDHB	-1.45624	0	100	0	0	-5.48415	22.0729
0	0	0	0	0	1	0	0	0	0	0	-2.55246	GO:0046496	M000001	1	0	GO Biological Processes	19	nicotinamide nucleotide metabolic process	19_GO:0009987 cellular process	-2.55246	10.7263	5.15999	30284	121	70	3	4.28571	2.42076	1291|2597|3945	COL6A1|GAPDH|LDHB	-1.45624	0	100	0	0	-5.48415	22.0729
0	0	0	0	0	1	0	0	0	0	0	-2.47408	GO:0072524	M000001	1	0	GO Biological Processes	19	pyridine-containing compound metabolic process	19_GO:0009987 cellular process	-2.47408	10.0611	4.96412	30284	129	70	3	4.28571	2.42076	1291|2597|3945	COL6A1|GAPDH|LDHB	-1.39257	0	100	0	0	-5.48415	22.0729
0	0	1	0	0	1	0	0	-3.06991	0	0	-4.77396	M145	M001001	2	0	Canonical Pathways	11	PID P53 DOWNSTREAM PATHWAY		-5.46916	8.97669	7.57189	30284	137	197	8	4.06091	1.4063	857|891|1956|4193|4313|5728|6591|8626	CAV1|CCNB1|EGFR|MDM2|MMP2|PTEN|SNAI2|TP63	-3.70248	0	101	1	1	-5.46916	49.2423
0	0	1	0	0	1	0	0	-4.50287	0	0	-3.8054	GO:0051602	M001001	2	0	GO Biological Processes	19	response to electrical stimulus	19_GO:0050896 response to stimulus	-4.50287	49.2423	11.9242	30284	45	41	3	7.31707	4.06702	4313|5728|58508	MMP2|PTEN|KMT2C	-3.02983	0	101	0	0	-5.46916	49.2423
0	0	0	0	0	1	0	0	0	0	0	-3.14366	WP5316	M000001	1	0	WikiPathways	27	Primary ovarian insufficiency		-3.14366	9.94548	5.69597	30284	174	70	4	5.71429	2.77431	857|4313|5728|8626	CAV1|MMP2|PTEN|TP63	-1.94004	0	101	0	0	-5.46916	49.2423
0	0	1	0	0	1	0	0	-2.72259	0	0	-5.3974	GO:1903034	M001001	2	0	GO Biological Processes	19	regulation of response to wounding	19_GO:0050896 response to stimulus	-5.3974	14.3413	8.66515	30284	181	70	6	8.57143	3.34594	857|2316|4638|5728|5764|7852	CAV1|FLNA|MYLK|PTEN|PTN|CXCR4	-3.78309	0	102	1	1	-5.3974	21.3644
0	0	0	0	0	1	0	0	0	0	0	-4.41941	GO:1903036	M000001	1	0	GO Biological Processes	19	positive regulation of response to wounding	19_GO:0048518 positive regulation of biological process	-4.41941	21.3644	8.8335	30284	81	70	4	5.71429	2.77431	2316|4638|5764|7852	FLNA|MYLK|PTN|CXCR4	-2.96559	0	102	0	0	-5.3974	21.3644
0	0	0	0	0	1	0	0	0	0	0	-3.49946	GO:0061041	M000001	1	0	GO Biological Processes	19	regulation of wound healing	19_GO:0050896 response to stimulus	-3.49946	12.3608	6.48511	30284	140	70	4	5.71429	2.77431	857|4638|5728|7852	CAV1|MYLK|PTEN|CXCR4	-2.22087	0	102	0	0	-5.3974	21.3644
0	0	0	0	0	1	0	0	0	0	0	-2.72748	M5923	M000001	1	0	Hallmark Gene Sets	23	HALLMARK PI3K AKT MTOR SIGNALING		-2.72748	12.3608	5.61301	30284	105	70	3	4.28571	2.42076	3561|5728|7852	IL2RG|PTEN|CXCR4	-1.60262	0	102	0	0	-5.3974	21.3644
0	0	0	0	0	1	0	0	0	0	0	-2.08002	GO:0141091	M000001	1	0	GO Biological Processes	19	transforming growth factor beta receptor superfamily signaling pathway	19_GO:0050896 response to stimulus	-2.93475	5.15282	4.50914	30284	179	197	6	3.04569	1.22431	1278|1281|5468|6422|8754|9404	COL1A2|COL3A1|PPARG|SFRP1|ADAM9|LPXN	-1.56172	0	104	0	0	-5.30836	8.54033
0	0	0	0	0	1	0	0	0	0	0	-2.00353	GO:0007178	M000001	1	0	GO Biological Processes	19	cell surface receptor protein serine/threonine kinase signaling pathway	19_GO:0050896 response to stimulus	-2.7911	4.82909	4.29558	30284	191	197	6	3.04569	1.22431	1278|1281|5468|6422|8754|9404	COL1A2|COL3A1|PPARG|SFRP1|ADAM9|LPXN	-1.43909	0	104	0	0	-5.30836	8.54033
0	0	1	0	0	1	0	0	-3.32899	0	0	-2.78011	GO:0007420	M001001	2	0	GO Biological Processes	19	brain development	19_GO:0032502 developmental process	-4.48661	3.3015	5.14676	30284	745	197	16	8.12183	1.94626	220|999|1063|1281|1282|1524|1956|2296|2316|4677|5728|5914|6387|6659|7852|10409	ALDH1A3|CDH1|CENPF|COL3A1|COL4A1|CX3CR1|EGFR|FOXC1|FLNA|NARS1|PTEN|RARA|CXCL12|SOX4|CXCR4|BASP1	-2.87789	0	105	0	0	-5.29652	3.48059
0	0	0	0	0	1	0	0	0	0	0	-3.67664	GO:0050808	M000001	1	0	GO Biological Processes	19	synapse organization	19_GO:0009987 cellular process	-4.49282	4.59507	5.61464	30284	368	197	11	5.58376	1.63589	712|714|999|1282|1524|2017|2064|2316|5728|8404|11004	C1QA|C1QC|CDH1|COL4A1|CX3CR1|CTTN|ERBB2|FLNA|PTEN|SPARCL1|KIF2C	-2.88317	0	107	0	0	-5.24978	5.54421
0	0	0	0	1	0	0	0	0	0	-5.24506	0	M242	M000010	1	0	Canonical Pathways	11	PID AURORA A PATHWAY		-5.24506	86.1973	15.9111	30284	31	34	3	8.82353	4.86433	332|4193|6790	BIRC5|MDM2|AURKA	-3.65536	0	108	1	1	-5.24506	86.1973
0	0	0	0	1	1	0	0	0	0	-4.54426	-2.23627	hsa04218	M000011	2	0	KEGG Pathway	24	Cellular senescence		-4.54426	22.6931	9.1363	30284	157	34	4	11.7647	5.52551	891|1978|4193|4605	CCNB1|EIF4EBP1|MDM2|MYBL2	-3.06439	0	108	0	0	-5.24506	86.1973
0	0	0	0	1	0	0	0	0	0	-4.28903	0	WP45	M000010	1	0	WikiPathways	27	G1 to S cell cycle control		-4.28903	41.7518	10.9412	30284	64	34	3	8.82353	4.86433	891|4193|23594	CCNB1|MDM2|ORC6	-2.85917	0	108	0	0	-5.24506	86.1973
0	0	0	0	1	0	0	0	0	0	-4.08299	0	hsa01524	M000010	1	0	KEGG Pathway	24	Platinum drug resistance		-4.08299	35.6282	10.0663	30284	75	34	3	8.82353	4.86433	332|4193|7153	BIRC5|MDM2|TOP2A	-2.69907	0	108	0	0	-5.24506	86.1973
0	0	0	0	1	0	0	0	0	0	-4.08299	0	hsa04115	M000010	1	0	KEGG Pathway	24	p53 signaling pathway		-4.08299	35.6282	10.0663	30284	75	34	3	8.82353	4.86433	891|4193|6241	CCNB1|MDM2|RRM2	-2.69907	0	108	0	0	-5.24506	86.1973
0	0	0	0	1	0	0	0	0	0	-3.26526	0	R-HSA-3108232	M000010	1	0	Reactome Gene Sets	6	SUMO E3 ligases SUMOylate target proteins		-3.26526	18.8177	7.13488	30284	142	34	3	8.82353	4.86433	4193|6790|7153	MDM2|AURKA|TOP2A	-2.03729	0	108	0	0	-5.24506	86.1973
0	0	0	0	1	0	0	0	0	0	-3.21295	0	R-HSA-2990846	M000010	1	0	Reactome Gene Sets	6	SUMOylation		-3.21295	18.0548	6.97288	30284	148	34	3	8.82353	4.86433	4193|6790|7153	MDM2|AURKA|TOP2A	-1.99451	0	108	0	0	-5.24506	86.1973
0	0	0	0	1	0	0	0	0	0	-2.38348	0	R-HSA-3700989	M000010	1	0	Reactome Gene Sets	6	Transcriptional Regulation by TP53		-2.38348	9.24608	4.72224	30284	289	34	3	8.82353	4.86433	891|4193|6790	CCNB1|MDM2|AURKA	-1.31655	0	108	0	0	-5.24506	86.1973
0	0	1	0	0	1	0	0	-5.13188	0	0	-3.99103	M5891	M001001	2	0	Hallmark Gene Sets	23	HALLMARK HYPOXIA		-5.15408	6.91766	6.79424	30284	200	197	9	4.56853	1.48765	857|1289|1956|2597|6275|6385|7163|7422|7852	CAV1|COL5A1|EGFR|GAPDH|S100A4|SDC4|TPD52|VEGFA|CXCR4	-3.45167	0	110	1	1	-5.15408	6.91766
0	0	1	0	0	0	0	0	-3.81141	0	0	0	M5937	M001000	1	0	Hallmark Gene Sets	23	HALLMARK GLYCOLYSIS		-5.15408	6.91766	6.79424	30284	200	197	9	4.56853	1.48765	960|1289|1491|1824|1956|6790|7033|7422|7852	CD44|COL5A1|CTH|DSC2|EGFR|AURKA|TFF3|VEGFA|CXCR4	-3.45167	0	110	0	0	-5.15408	6.91766
0	0	1	0	0	1	0	0	-4.54338	0	0	-3.4248	GO:0003007	M001001	2	0	GO Biological Processes	19	heart morphogenesis	19_GO:0032502 developmental process	-4.9916	5.80098	6.35181	30284	265	197	10	5.07614	1.56394	1289|1832|2296|2316|2625|4193|5914|6591|6659|7422	COL5A1|DSP|FOXC1|FLNA|GATA3|MDM2|RARA|SNAI2|SOX4|VEGFA	-3.31268	0	112	1	1	-4.9916	17.7793
0	0	0	1	0	0	0	0	0	-2.64413	0	0	GO:0003206	M000100	1	0	GO Biological Processes	19	cardiac chamber morphogenesis	19_GO:0032502 developmental process	-3.6867	7.15004	5.66417	30284	129	197	6	3.04569	1.22431	1832|2296|2625|4193|5914|6659	DSP|FOXC1|GATA3|MDM2|RARA|SOX4	-2.20105	0	112	0	0	-4.9916	17.7793
0	0	0	0	0	1	0	0	0	0	0	-3.18372	GO:0060415	M000001	1	0	GO Biological Processes	19	muscle tissue morphogenesis	19_GO:0032502 developmental process	-3.18372	17.7793	6.90869	30284	73	70	3	4.28571	2.42076	1832|2296|4638	DSP|FOXC1|MYLK	-1.97127	0	112	0	0	-4.9916	17.7793
0	0	0	0	0	1	0	0	0	0	0	-3.05216	GO:0048644	M000001	1	0	GO Biological Processes	19	muscle organ morphogenesis	19_GO:0032502 developmental process	-3.05216	16.0233	6.51668	30284	81	70	3	4.28571	2.42076	1832|2296|4638	DSP|FOXC1|MYLK	-1.86523	0	112	0	0	-4.9916	17.7793
0	0	0	1	0	0	0	0	0	-2.29332	0	0	GO:0003205	M000100	1	0	GO Biological Processes	19	cardiac chamber development	19_GO:0032502 developmental process	-3.02399	5.36253	4.64276	30284	172	197	6	3.04569	1.22431	1832|2296|2625|4193|5914|6659	DSP|FOXC1|GATA3|MDM2|RARA|SOX4	-1.63619	0	112	0	0	-4.9916	17.7793
0	0	0	1	0	0	0	0	0	-2.64413	0	0	GO:0003231	M000100	1	0	GO Biological Processes	19	cardiac ventricle development	19_GO:0032502 developmental process	-2.79912	5.95837	4.56664	30284	129	197	5	2.53807	1.12056	1832|2296|2625|4193|6659	DSP|FOXC1|GATA3|MDM2|SOX4	-1.44608	0	112	0	0	-4.9916	17.7793
0	0	0	0	0	1	0	0	0	0	0	-4.42981	WP5422	M000001	1	0	WikiPathways	27	IL19 signaling		-4.50215	21.9608	8.97894	30284	28	197	4	2.03046	1.00487	59|891|1277|7852	ACTA2|CCNB1|COL1A1|CXCR4	-2.89064	0	113	0	0	-4.97082	70.156
0	0	0	0	0	1	0	0	0	0	0	-2.65012	GO:0006936	M000001	1	0	GO Biological Processes	19	muscle contraction	19_GO:0032501 multicellular organismal process	-2.65012	7.30175	4.68791	30284	237	70	4	5.71429	2.77431	59|4638|5290|7852	ACTA2|MYLK|PIK3CA|CXCR4	-1.53636	0	113	0	0	-4.97082	70.156
0	0	0	0	0	1	0	0	0	0	0	-2.3745	hsa04371	M000001	1	0	KEGG Pathway	24	Apelin signaling pathway		-2.3745	9.27061	4.72113	30284	140	70	3	4.28571	2.42076	59|595|4638	ACTA2|CCND1|MYLK	-1.30839	0	113	0	0	-4.97082	70.156
0	0	0	0	0	1	0	0	0	0	0	-4.93653	GO:0032835	M000001	1	0	GO Biological Processes	19	glomerulus development	19_GO:0032502 developmental process	-4.93653	28.8419	10.3907	30284	60	70	4	5.71429	2.77431	59|2296|5175|10409	ACTA2|FOXC1|PECAM1|BASP1	-3.39621	0	114	1	1	-4.93653	28.8419
0	0	0	0	0	1	0	0	0	0	0	-4.47831	GO:0072010	M000001	1	0	GO Biological Processes	19	glomerular epithelium development	19_GO:0032502 developmental process	-4.56689	22.7742	9.15913	30284	27	197	4	2.03046	1.00487	2296|5175|10409|100133941	FOXC1|PECAM1|BASP1|CD24	-2.94213	0	114	0	0	-4.93653	28.8419
0	0	0	0	0	1	0	0	0	0	0	-3.48771	GO:0072006	M000001	1	0	GO Biological Processes	19	nephron development	19_GO:0032502 developmental process	-4.39643	7.63178	6.38689	30284	141	197	7	3.5533	1.31894	59|2296|2625|4070|5175|10409|100133941	ACTA2|FOXC1|GATA3|TACSTD2|PECAM1|BASP1|CD24	-2.80317	0	114	0	0	-4.93653	28.8419
0	0	0	0	0	1	0	0	0	0	0	-2.65869	GO:0072009	M000001	1	0	GO Biological Processes	19	nephron epithelium development	19_GO:0032502 developmental process	-4.04481	8.30951	6.24286	30284	111	197	6	3.04569	1.22431	2296|2625|4070|5175|10409|100133941	FOXC1|GATA3|TACSTD2|PECAM1|BASP1|CD24	-2.51773	0	114	0	0	-4.93653	28.8419
0	0	0	0	0	1	0	0	0	0	0	-2.82606	GO:0035282	M000001	1	0	GO Biological Processes	19	segmentation	19_GO:0032502 developmental process	-2.82606	13.3803	5.87828	30284	97	70	3	4.28571	2.42076	2296|6422|10409	FOXC1|SFRP1|BASP1	-1.68383	0	114	0	0	-4.93653	28.8419
0	0	0	0	0	1	0	0	0	0	0	-2.75135	GO:0046620	M000001	1	0	GO Biological Processes	19	regulation of organ growth	19_GO:0040007 growth	-2.75135	12.6008	5.67656	30284	103	70	3	4.28571	2.42076	2296|5728|10409	FOXC1|PTEN|BASP1	-1.62191	0	114	0	0	-4.93653	28.8419
0	0	0	0	0	1	0	0	0	0	0	-2.5694	GO:0003002	M000001	1	0	GO Biological Processes	19	regionalization	19_GO:0032502 developmental process	-2.5694	5.23763	4.17367	30284	413	70	5	7.14286	3.07818	712|2296|6422|8626|10409	C1QA|FOXC1|SFRP1|TP63|BASP1	-1.46848	0	114	0	0	-4.93653	28.8419
0	0	0	0	0	1	0	0	0	0	0	-2.36641	GO:0007389	M000001	1	0	GO Biological Processes	19	pattern specification process	19_GO:0032502 developmental process	-2.36641	4.69228	3.84516	30284	461	70	5	7.14286	3.07818	712|2296|6422|8626|10409	C1QA|FOXC1|SFRP1|TP63|BASP1	-1.30193	0	114	0	0	-4.93653	28.8419
0	0	0	1	0	1	0	0	0	-2.34346	0	-3.22999	GO:2001236	M000101	2	0	GO Biological Processes	19	regulation of extrinsic apoptotic signaling pathway	19_GO:0050896 response to stimulus	-4.87469	7.45338	6.72592	30284	165	197	8	4.06091	1.4063	367|857|2017|3655|5788|6422|6591|81618	AR|CAV1|CTTN|ITGA6|PTPRC|SFRP1|SNAI2|ITM2C	-3.20758	0	115	1	1	-4.87469	14.6017
0	0	0	1	0	0	0	0	0	-2.93609	0	0	GO:2001237	M000100	1	0	GO Biological Processes	19	negative regulation of extrinsic apoptotic signaling pathway	19_GO:0048519 negative regulation of biological process	-2.93609	14.6017	6.18181	30284	102	61	3	4.91803	2.76873	367|2017|3655	AR|CTTN|ITGA6	-1.7718	0	115	0	0	-4.87469	14.6017
0	0	0	1	0	1	0	0	0	-3.24255	0	-3.06784	M223	M000101	2	0	Canonical Pathways	11	PID BETA CATENIN NUC PATHWAY		-4.84949	11.5294	7.63064	30284	80	197	6	3.04569	1.22431	367|595|999|4313|6591|9968	AR|CCND1|CDH1|MMP2|SNAI2|MED12	-3.18674	0	116	1	1	-4.84949	11.5294
0	0	0	0	1	1	0	0	0	0	-2.28761	-4.0062	R-HSA-1280218	M000011	2	0	Reactome Gene Sets	6	Adaptive Immune System		-4.77275	3.67765	5.48236	30284	627	197	15	7.61421	1.88965	920|929|942|991|999|1277|1278|2214|5290|5788|6279|7277|10802|11004|11065	CD4|CD14|CD86|CDC20|CDH1|COL1A1|COL1A2|FCGR3A|PIK3CA|PTPRC|S100A8|TUBA4A|SEC24A|KIF2C|UBE2C	-3.12328	0	117	1	1	-4.77275	3.67765
0	0	1	0	1	1	0	0	-2.5646	0	-2.86976	-2.48586	WP3888	M001011	3	0	WikiPathways	27	VEGFA VEGFR2 signaling		-4.5402	4.27016	5.53946	30284	432	197	12	6.09137	1.70403	332|595|857|2317|2597|4193|4313|5290|6732|7422|8754|57758	BIRC5|CCND1|CAV1|FLNB|GAPDH|MDM2|MMP2|PIK3CA|SRPK1|VEGFA|ADAM9|SCUBE2	-2.91927	0	119	1	1	-4.5402	4.27016
0	0	0	1	0	0	0	0	0	-3.72279	0	0	WP2272	M000100	1	0	WikiPathways	27	Pathogenic Escherichia coli infection		-4.52907	13.9751	7.79332	30284	55	197	5	2.53807	1.12056	929|999|2017|3875|7277	CD14|CDH1|CTTN|KRT18|TUBA4A	-2.91382	0	120	1	1	-4.52907	27.0796
0	0	0	1	0	0	0	0	0	-3.72279	0	0	M276	M000100	1	0	Canonical Pathways	11	PID FGF PATHWAY		-3.72279	27.0796	8.69692	30284	55	61	3	4.91803	2.76873	999|2017|2264	CDH1|CTTN|FGFR4	-2.40479	0	120	0	0	-4.52907	27.0796
0	0	0	1	0	0	0	0	0	-2.96091	0	0	GO:0051262	M000100	1	0	GO Biological Processes	19	protein tetramerization	19_GO:0009987 cellular process	-4.29777	9.22355	6.66522	30284	100	197	6	3.04569	1.22431	220|1291|1491|3858|6241|8626	ALDH1A3|COL6A1|CTH|KRT10|RRM2|TP63	-2.7263	0	121	1	1	-4.29777	9.22355
0	0	1	0	0	1	0	0	-2.23079	0	0	-3.38045	GO:0051259	M001001	2	0	GO Biological Processes	19	protein complex oligomerization	19_GO:0009987 cellular process	-4.11712	5.10529	5.49309	30284	271	197	9	4.56853	1.48765	220|1278|1291|1491|3858|6241|8626|10409|92610	ALDH1A3|COL1A2|COL6A1|CTH|KRT10|RRM2|TP63|BASP1|TIFA	-2.5768	0	121	0	0	-4.29777	9.22355
0	0	0	1	0	0	0	0	0	-2.70297	0	0	GO:0031032	M000100	1	0	GO Biological Processes	19	actomyosin structure organization	19_GO:0009987 cellular process	-3.79938	7.49882	5.84396	30284	123	197	6	3.04569	1.22431	1265|3856|3880|4604|9839|54443	CNN2|KRT8|KRT19|MYBPC1|ZEB2|ANLN	-2.29835	0	122	0	0	-4.18484	11.7768
0	0	0	0	0	1	0	0	0	0	0	-4.17248	GO:0070570	M000001	1	0	GO Biological Processes	19	regulation of neuron projection regeneration	19_GO:0032502 developmental process	-4.17248	38.1731	10.4388	30284	34	70	3	4.28571	2.42076	2316|5764|7070	FLNA|PTN|THY1	-2.76765	0	123	1	1	-4.17248	38.1731
0	0	0	0	0	1	0	0	0	0	0	-3.7489	GO:0043113	M000001	1	0	GO Biological Processes	19	receptor clustering	19_GO:0051179 localization	-3.7489	27.6146	8.78909	30284	47	70	3	4.28571	2.42076	2316|5764|7070	FLNA|PTN|THY1	-2.42614	0	123	0	0	-4.17248	38.1731
0	0	0	0	0	1	0	0	0	0	0	-2.87865	GO:2000177	M000001	1	0	GO Biological Processes	19	regulation of neural precursor cell proliferation	19_GO:0050789 regulation of biological process	-2.87865	13.9558	6.02296	30284	93	70	3	4.28571	2.42076	1524|2316|5764	CX3CR1|FLNA|PTN	-1.72553	0	123	0	0	-4.17248	38.1731
0	0	0	0	0	1	0	0	0	0	0	-2.85206	GO:0045185	M000001	1	0	GO Biological Processes	19	maintenance of protein location	19_GO:0051179 localization	-2.85206	13.662	5.94953	30284	95	70	3	4.28571	2.42076	857|920|2316	CAV1|CD4|FLNA	-1.7025	0	123	0	0	-4.17248	38.1731
0	0	0	0	0	1	0	0	0	0	0	-2.3832	GO:0050768	M000001	1	0	GO Biological Processes	19	negative regulation of neurogenesis	19_GO:0032502 developmental process	-2.3832	9.33731	4.74209	30284	139	70	3	4.28571	2.42076	5728|5764|7070	PTEN|PTN|THY1	-1.31655	0	123	0	0	-4.17248	38.1731
0	0	0	0	0	1	0	0	0	0	0	-2.35731	GO:1904064	M000001	1	0	GO Biological Processes	19	positive regulation of cation transmembrane transport	19_GO:0051179 localization	-2.35731	9.14004	4.67982	30284	142	70	3	4.28571	2.42076	857|2316|7070	CAV1|FLNA|THY1	-1.2949	0	123	0	0	-4.17248	38.1731
0	0	0	0	0	1	0	0	0	0	0	-2.31547	GO:0051961	M000001	1	0	GO Biological Processes	19	negative regulation of nervous system development	19_GO:0032502 developmental process	-2.31547	8.82915	4.58003	30284	147	70	3	4.28571	2.42076	5728|5764|7070	PTEN|PTN|THY1	-1.25933	0	123	0	0	-4.17248	38.1731
0	0	0	0	0	1	0	0	0	0	0	-2.27516	GO:0034767	M000001	1	0	GO Biological Processes	19	positive regulation of monoatomic ion transmembrane transport	19_GO:0051179 localization	-2.27516	8.53872	4.48487	30284	152	70	3	4.28571	2.42076	857|2316|7070	CAV1|FLNA|THY1	-1.22597	0	123	0	0	-4.17248	38.1731
0	0	0	0	0	1	0	0	0	0	0	-2.11359	GO:0051235	M000001	1	0	GO Biological Processes	19	maintenance of location	19_GO:0051179 localization	-2.24189	4.41741	3.65813	30284	174	197	5	2.53807	1.12056	857|920|2316|6279|6713	CAV1|CD4|FLNA|S100A8|SQLE	-0.952338	0	123	0	0	-4.17248	38.1731
0	0	0	1	0	1	0	0	0	-2.34387	0	-2.13237	GO:0097190	M000101	2	0	GO Biological Processes	19	apoptotic signaling pathway	19_GO:0050896 response to stimulus	-4.1602	4.6303	5.38197	30284	332	197	10	5.07614	1.56394	857|1613|2017|3856|3875|5788|6422|8626|9833|100133941	CAV1|DAPK3|CTTN|KRT8|KRT18|PTPRC|SFRP1|TP63|MELK|CD24	-2.61431	0	124	1	1	-4.1602	33.0973
0	0	0	1	0	0	0	0	0	-3.98347	0	0	GO:1904019	M000100	1	0	GO Biological Processes	19	epithelial cell apoptotic process	19_GO:0009987 cellular process	-3.98347	33.0973	9.68024	30284	45	61	3	4.91803	2.76873	3856|3875|54532	KRT8|KRT18|USP53	-2.61785	0	124	0	0	-4.1602	33.0973
0	0	0	1	0	0	0	0	0	-2.79724	0	0	GO:0097191	M000100	1	0	GO Biological Processes	19	extrinsic apoptotic signaling pathway	19_GO:0050896 response to stimulus	-3.03811	6.74236	4.97048	30284	114	197	5	2.53807	1.12056	2017|3856|3875|5788|6422	CTTN|KRT8|KRT18|PTPRC|SFRP1	-1.64919	0	124	0	0	-4.1602	33.0973
0	0	0	1	0	1	0	0	0	-4.04524	0	-2.60434	R-HSA-5357801	M000101	2	0	Reactome Gene Sets	6	Programmed Cell Death		-4.04524	17.1193	7.81442	30284	116	61	4	6.55738	3.16937	999|1613|1832|57162	CDH1|DAPK3|DSP|PELI1	-2.6668	0	125	1	1	-4.04524	17.1193
0	0	0	1	0	1	0	0	0	-2.99914	0	-2.82606	R-HSA-109581	M000101	2	0	Reactome Gene Sets	6	Apoptosis		-3.35705	7.92401	5.52684	30284	97	197	5	2.53807	1.12056	929|999|1613|1832|7431	CD14|CDH1|DAPK3|DSP|VIM	-1.91914	0	125	0	0	-4.04524	17.1193
0	0	0	0	1	0	0	0	0	0	-3.99945	0	GO:0045069	M000010	1	0	GO Biological Processes	19	regulation of viral genome replication	19_GO:0016032 viral process	-3.99945	33.4015	9.72868	30284	80	34	3	8.82353	4.86433	6732|7153|9582	SRPK1|TOP2A|APOBEC3B	-2.62965	0	126	1	1	-3.99945	33.4015
0	0	0	0	1	0	0	0	0	0	-3.35778	0	GO:1903900	M000010	1	0	GO Biological Processes	19	regulation of viral life cycle	19_GO:0016032 viral process	-3.35778	20.2433	7.42822	30284	132	34	3	8.82353	4.86433	6732|7153|9582	SRPK1|TOP2A|APOBEC3B	-2.1101	0	126	0	0	-3.99945	33.4015
0	0	0	0	1	0	0	0	0	0	-3.12259	0	GO:0050792	M000010	1	0	GO Biological Processes	19	regulation of viral process	19_GO:0016032 viral process	-3.12259	16.8058	6.69926	30284	159	34	3	8.82353	4.86433	6732|7153|9582	SRPK1|TOP2A|APOBEC3B	-1.92224	0	126	0	0	-3.99945	33.4015
0	0	0	0	1	0	0	0	0	0	-2.83561	0	M5926	M000010	1	0	Hallmark Gene Sets	23	HALLMARK MYC TARGETS V1		-2.83561	13.3606	5.8798	30284	200	34	3	8.82353	4.86433	991|6732|7298	CDC20|SRPK1|TYMS	-1.68925	0	126	0	0	-3.99945	33.4015
0	0	0	1	0	0	0	0	0	-3.89937	0	0	WP5390	M000100	1	0	WikiPathways	27	Pancreatic cancer subtypes		-3.89937	31.0287	9.35385	30284	48	61	3	4.91803	2.76873	3855|4069|7033	KRT7|LYZ|TFF3	-2.54736	0	127	1	1	-3.89937	31.0287
0	0	1	0	0	0	0	0	-3.82055	0	0	0	WP4949	M001000	1	0	WikiPathways	27	16p11 2 proximal deletion syndrome		-3.85186	10.1135	6.43689	30284	76	197	5	2.53807	1.12056	5468|5728|8030|8085|58508	PPARG|PTEN|CCDC6|KMT2D|KMT2C	-2.34575	0	128	1	1	-3.85186	10.1135
0	0	0	1	0	0	0	0	0	-2.67317	0	0	R-HSA-9818564	M000100	1	0	Reactome Gene Sets	6	Epigenetic regulation of gene expression by MLL3 and MLL4 complexes		-2.84425	6.10023	4.64213	30284	126	197	5	2.53807	1.12056	5468|6319|8085|9968|58508	PPARG|SCD|KMT2D|MED12|KMT2C	-1.48447	0	128	0	0	-3.85186	10.1135
0	0	0	1	0	0	0	0	0	-2.67317	0	0	R-HSA-9841922	M000100	1	0	Reactome Gene Sets	6	MLL4 and MLL3 complexes regulate expression of PPARG target genes in adipogenesis and hepatic steatosis		-2.84425	6.10023	4.64213	30284	126	197	5	2.53807	1.12056	5468|6319|8085|9968|58508	PPARG|SCD|KMT2D|MED12|KMT2C	-1.48447	0	128	0	0	-3.85186	10.1135
0	0	0	1	0	0	0	0	0	-2.67317	0	0	R-HSA-9851695	M000100	1	0	Reactome Gene Sets	6	Epigenetic regulation of adipogenesis genes by MLL3 and MLL4 complexes		-2.84425	6.10023	4.64213	30284	126	197	5	2.53807	1.12056	5468|6319|8085|9968|58508	PPARG|SCD|KMT2D|MED12|KMT2C	-1.48447	0	128	0	0	-3.85186	10.1135
0	0	0	1	0	0	0	0	0	-2.46733	0	0	R-HSA-9917777	M000100	1	0	Reactome Gene Sets	6	Epigenetic regulation by WDR5-containing histone modifying complexes		-2.5267	5.15859	4.11762	30284	149	197	5	2.53807	1.12056	5468|6319|8085|9968|58508	PPARG|SCD|KMT2D|MED12|KMT2C	-1.21012	0	128	0	0	-3.85186	10.1135
0	0	0	0	1	0	0	0	0	0	-3.79153	0	GO:0071897	M000010	1	0	GO Biological Processes	19	DNA biosynthetic process	19_GO:0009987 cellular process	-3.79153	28.4268	8.9286	30284	94	34	3	8.82353	4.86433	1063|7298|9768	CENPF|TYMS|PCLAF	-2.46005	0	129	1	1	-3.79153	28.4268
0	0	0	0	1	0	0	0	0	0	-2.75747	0	GO:0017148	M000010	1	0	GO Biological Processes	19	negative regulation of translation	19_GO:0048519 negative regulation of biological process	-2.75747	12.5452	5.66881	30284	213	34	3	8.82353	4.86433	1978|2597|7298	EIF4EBP1|GAPDH|TYMS	-1.62649	0	129	0	0	-3.79153	28.4268
0	0	0	1	0	0	0	0	0	-2.2794	0	0	GO:0015850	M000100	1	0	GO Biological Processes	19	organic hydroxy compound transport	19_GO:0051179 localization	-2.2794	8.55964	4.49279	30284	174	61	3	4.91803	2.76873	341|1645|85320	APOC1|AKR1C1|ABCC11	-1.2297	0	130	0	0	-3.78663	27.9115
0	0	0	0	1	0	0	0	0	0	-3.77793	0	GO:0032465	M000010	1	0	GO Biological Processes	19	regulation of cytokinesis	19_GO:0050789 regulation of biological process	-3.77793	28.1276	8.87819	30284	95	34	3	8.82353	4.86433	332|990|6790	BIRC5|CDC6|AURKA	-2.44839	0	131	1	1	-3.77793	28.1276
0	0	0	0	1	1	0	0	0	0	-2.89946	-2.0097	GO:0051302	M000011	2	0	GO Biological Processes	19	regulation of cell division	19_GO:0050789 regulation of biological process	-3.58849	5.66359	5.21795	30284	190	197	7	3.5533	1.31894	332|990|5764|6790|6840|7422|8626	BIRC5|CDC6|PTN|AURKA|SVIL|VEGFA|TP63	-2.1195	0	131	0	0	-3.77793	28.1276
0	0	0	0	0	1	0	0	0	0	0	-2.72748	GO:0032642	M000001	1	0	GO Biological Processes	19	regulation of chemokine production	19_GO:0032501 multicellular organismal process	-2.72748	12.3608	5.61301	30284	105	70	3	4.28571	2.42076	199|6591|84868	AIF1|SNAI2|HAVCR2	-1.60262	0	132	0	0	-3.68103	26.1219
0	0	1	0	0	0	0	0	-3.6456	0	0	0	GO:0042593	M001000	1	0	GO Biological Processes	19	glucose homeostasis	19_GO:0042592 homeostatic process	-3.6456	13.3689	6.79503	30284	221	41	4	9.7561	4.63399	1277|2264|6659|25825	COL1A1|FGFR4|SOX4|BACE2	-2.34022	0	133	1	1	-3.6456	13.3689
0	0	1	0	0	0	0	0	-3.63813	0	0	0	GO:0033500	M001000	1	0	GO Biological Processes	19	carbohydrate homeostasis	19_GO:0042592 homeostatic process	-3.63813	13.3087	6.77734	30284	222	41	4	9.7561	4.63399	1277|2264|6659|25825	COL1A1|FGFR4|SOX4|BACE2	-2.33529	0	133	0	0	-3.6456	13.3689
0	0	0	1	0	0	0	0	0	-3.6105	0	0	R-HSA-204005	M000100	1	0	Reactome Gene Sets	6	COPII-mediated vesicle transport		-3.6105	24.823	8.29833	30284	60	61	3	4.91803	2.76873	10802|23243|27095	SEC24A|ANKRD28|TRAPPC3	-2.31333	0	134	1	1	-3.6105	24.823
0	0	0	1	0	0	0	0	0	-2.5523	0	0	R-HSA-199977	M000100	1	0	Reactome Gene Sets	6	ER to Golgi Anterograde Transport		-2.5523	10.7149	5.15746	30284	139	61	3	4.91803	2.76873	10802|23243|27095	SEC24A|ANKRD28|TRAPPC3	-1.45624	0	134	0	0	-3.6105	24.823
0	0	0	1	0	0	0	0	0	-2.30741	0	0	R-HSA-948021	M000100	1	0	Reactome Gene Sets	6	Transport to the Golgi and subsequent modification		-2.30741	8.76104	4.55886	30284	170	61	3	4.91803	2.76873	10802|23243|27095	SEC24A|ANKRD28|TRAPPC3	-1.25296	0	134	0	0	-3.6105	24.823
0	0	0	1	0	0	0	0	0	-2.09534	0	0	hsa05130	M000100	1	0	KEGG Pathway	24	Pathogenic Escherichia coli infection		-2.09534	7.33683	4.06977	30284	203	61	3	4.91803	2.76873	2017|4645|10802	CTTN|MYO5B|SEC24A	-1.07096	0	134	0	0	-3.6105	24.823
0	0	1	0	1	0	0	0	-2.73333	0	-3.04195	0	GO:0006468	M001010	2	0	GO Biological Processes	19	protein phosphorylation	19_GO:0009987 cellular process	-3.61035	3.96201	4.75159	30284	388	197	10	5.07614	1.56394	332|1613|1956|2064|2264|4638|5914|6732|6790|9833	BIRC5|DAPK3|EGFR|ERBB2|FGFR4|MYLK|RARA|SRPK1|AURKA|MELK	-2.13664	0	135	1	1	-3.61035	3.96201
0	0	1	0	1	0	0	0	-2.561	0	-2.86607	0	GO:0016310	M001010	2	0	GO Biological Processes	19	phosphorylation	19_GO:0009987 cellular process	-3.23735	3.55025	4.32504	30284	433	197	10	5.07614	1.56394	332|1613|1956|2064|2264|4638|5914|6732|6790|9833	BIRC5|DAPK3|EGFR|ERBB2|FGFR4|MYLK|RARA|SRPK1|AURKA|MELK	-1.82077	0	135	0	0	-3.61035	3.96201
0	0	1	0	0	0	0	0	-3.55115	0	0	0	GO:0050821	M001000	1	0	GO Biological Processes	19	protein stabilization	19_GO:0065007 biological regulation	-3.55115	12.6262	6.5736	30284	234	41	4	9.7561	4.63399	2316|2597|5728|6659	FLNA|GAPDH|PTEN|SOX4	-2.26513	0	136	1	1	-3.55115	12.6262
0	0	1	0	0	1	0	0	-2.45688	0	0	-2.3585	GO:0042391	M001001	2	0	GO Biological Processes	19	regulation of membrane potential	19_GO:0065007 biological regulation	-2.45688	6.38129	4.2963	30284	463	41	4	9.7561	4.63399	1291|1824|2316|5728	COL6A1|DSC2|FLNA|PTEN	-1.37948	0	136	0	0	-3.55115	12.6262
0	0	0	0	0	1	0	0	0	0	0	-2.92732	M5947	M000001	1	0	Hallmark Gene Sets	23	HALLMARK IL2 STAT5 SIGNALING		-3.46682	5.40744	5.04756	30284	199	197	7	3.5533	1.31894	942|960|990|1291|3655|4582|10875	CD86|CD44|CDC6|COL6A1|ITGA6|MUC1|FGL2	-2.01445	0	137	1	1	-3.46682	5.40744
0	0	0	0	0	1	0	0	0	0	0	-2.11359	GO:0007565	M000001	1	0	GO Biological Processes	19	female pregnancy	19_GO:0022414 reproductive process	-2.99806	5.30089	4.60385	30284	174	197	6	3.04569	1.22431	367|2706|4313|5764|5914|84868	AR|GJB2|MMP2|PTN|RARA|HAVCR2	-1.61579	0	139	0	0	-3.38957	11.4075
0	0	0	0	0	1	0	0	0	0	0	-3.30192	GO:0006959	M000001	1	0	GO Biological Processes	19	humoral immune response	19_GO:0002376 immune system process	-3.30192	7.67072	5.4171	30284	282	70	5	7.14286	3.07818	712|714|1880|2597|4069	C1QA|C1QC|GPR183|GAPDH|LYZ	-2.06489	0	140	1	1	-3.30192	7.67072
0	0	0	0	0	1	0	0	0	0	0	-2.08002	GO:0001906	M000001	1	0	GO Biological Processes	19	cell killing	19_GO:0009987 cellular process	-2.08002	7.25076	4.03724	30284	179	70	3	4.28571	2.42076	2214|2597|4069	FCGR3A|GAPDH|LYZ	-1.05828	0	140	0	0	-3.30192	7.67072
0	0	1	0	0	0	0	0	-2.20028	0	0	0	GO:0051896	M001000	1	0	GO Biological Processes	19	regulation of phosphatidylinositol 3-kinase/protein kinase B signal transduction	19_GO:0050896 response to stimulus	-3.30175	4.42377	4.64051	30284	278	197	8	4.06091	1.4063	1524|1956|2625|5290|5728|7422|8644|55165	CX3CR1|EGFR|GATA3|PIK3CA|PTEN|VEGFA|AKR1C3|CEP55	-1.87312	0	141	1	1	-3.30175	4.42377
0	0	1	0	0	1	0	0	-2.1417	0	0	-2.32664	GO:0021700	M001001	2	0	GO Biological Processes	19	developmental maturation	19_GO:0032502 developmental process	-3.16227	4.21167	4.46234	30284	292	197	8	4.06091	1.4063	712|1524|2625|4313|5468|5728|7298|7422	C1QA|CX3CR1|GATA3|MMP2|PPARG|PTEN|TYMS|VEGFA	-1.75569	0	141	0	0	-3.30175	4.42377
0	0	0	1	0	0	0	0	0	-2.17527	0	0	WP5420	M000100	1	0	WikiPathways	27	ADHD and autism ASD pathways		-2.50896	3.31484	3.63013	30284	371	197	8	4.06091	1.4063	1491|1645|1956|2017|5290|5728|7298|8644	CTH|AKR1C1|EGFR|CTTN|PIK3CA|PTEN|TYMS|AKR1C3	-1.19332	0	141	0	0	-3.30175	4.42377
0	0	0	1	0	0	0	0	0	-3.15398	0	0	GO:0062012	M000100	1	0	GO Biological Processes	19	regulation of small molecule metabolic process	19_GO:0050789 regulation of biological process	-3.15398	7.09227	5.15023	30284	350	61	5	8.19672	3.51224	341|2264|6097|7033|8644	APOC1|FGFR4|RORC|TFF3|AKR1C3	-1.94559	0	142	1	1	-3.15398	13.298
0	0	0	1	0	0	0	0	0	-2.81927	0	0	GO:0019218	M000100	1	0	GO Biological Processes	19	regulation of steroid metabolic process	19_GO:0050789 regulation of biological process	-2.81927	13.298	5.85784	30284	112	61	3	4.91803	2.76873	2264|6097|8644	FGFR4|RORC|AKR1C3	-1.67831	0	142	0	0	-3.15398	13.298
0	0	0	1	0	0	0	0	0	-2.51754	0	0	GO:0010565	M000100	1	0	GO Biological Processes	19	regulation of ketone metabolic process	19_GO:0050789 regulation of biological process	-2.60366	5.37503	4.24339	30284	143	197	5	2.53807	1.12056	341|857|2264|5468|8644	APOC1|CAV1|FGFR4|PPARG|AKR1C3	-1.27897	0	142	0	0	-3.15398	13.298
0	0	0	1	0	0	0	0	0	-2.2941	0	0	GO:0019216	M000100	1	0	GO Biological Processes	19	regulation of lipid metabolic process	19_GO:0050789 regulation of biological process	-2.2941	5.78961	4.00783	30284	343	61	4	6.55738	3.16937	341|2264|6097|8644	APOC1|FGFR4|RORC|AKR1C3	-1.24209	0	142	0	0	-3.15398	13.298
0	0	0	1	0	0	0	0	0	-2.11894	0	0	GO:0046890	M000100	1	0	GO Biological Processes	19	regulation of lipid biosynthetic process	19_GO:0050789 regulation of biological process	-2.11894	7.48431	4.12297	30284	199	61	3	4.91803	2.76873	341|2264|8644	APOC1|FGFR4|AKR1C3	-1.09165	0	142	0	0	-3.15398	13.298
0	0	0	1	0	0	0	0	0	-2.83044	0	0	GO:0042632	M000100	1	0	GO Biological Processes	19	cholesterol homeostasis	19_GO:0042592 homeostatic process	-3.09027	6.92459	5.06004	30284	111	197	5	2.53807	1.12056	857|1645|2264|10802|100133941	CAV1|AKR1C1|FGFR4|SEC24A|CD24	-1.6934	0	143	1	1	-3.09027	6.92459
0	0	0	1	0	0	0	0	0	-2.81927	0	0	GO:0055092	M000100	1	0	GO Biological Processes	19	sterol homeostasis	19_GO:0042592 homeostatic process	-3.07271	6.86276	5.02982	30284	112	197	5	2.53807	1.12056	857|1645|2264|10802|100133941	CAV1|AKR1C1|FGFR4|SEC24A|CD24	-1.67817	0	143	0	0	-3.09027	6.92459
0	0	0	1	0	0	0	0	0	-2.19942	0	0	GO:0055088	M000100	1	0	GO Biological Processes	19	lipid homeostasis	19_GO:0042592 homeostatic process	-2.84959	4.9589	4.38233	30284	186	197	6	3.04569	1.22431	857|1645|2264|5468|10802|100133941	CAV1|AKR1C1|FGFR4|PPARG|SEC24A|CD24	-1.48825	0	143	0	0	-3.09027	6.92459
0	0	0	0	0	1	0	0	0	0	0	-2.0159	GO:0001959	M000001	1	0	GO Biological Processes	19	regulation of cytokine-mediated signaling pathway	19_GO:0050896 response to stimulus	-2.09398	4.06682	3.42228	30284	189	197	5	2.53807	1.12056	857|5468|5788|7852|100133941	CAV1|PPARG|PTPRC|CXCR4|CD24	-0.817542	0	143	0	0	-3.09027	6.92459
0	0	1	0	0	0	0	0	-2.96462	0	0	0	GO:0042886	M001000	1	0	GO Biological Processes	19	amide transport	19_GO:0051179 localization	-2.96462	14.8718	6.24986	30284	149	41	3	7.31707	4.06702	360|6279|8884	AQP3|S100A8|SLC5A6	-1.79396	0	144	1	1	-2.96462	14.8718
0	0	0	0	0	1	0	0	0	0	0	-2.96223	M5897	M000001	1	0	Hallmark Gene Sets	23	HALLMARK IL6 JAK STAT3 SIGNALING		-2.96223	14.9182	6.25757	30284	87	70	3	4.28571	2.42076	929|960|3561	CD14|CD44|IL2RG	-1.79261	0	145	1	1	-2.96223	14.9182
0	0	0	0	0	1	0	0	0	0	0	-2.56651	hsa05131	M000001	1	0	KEGG Pathway	24	Shigellosis		-2.88378	4.30432	4.24511	30284	250	197	7	3.5533	1.31894	929|960|1956|2017|4193|5290|92610	CD14|CD44|EGFR|CTTN|MDM2|PIK3CA|TIFA	-1.5177	0	145	0	0	-2.96223	14.9182
0	0	0	0	1	0	0	0	0	0	-2.48098	0	R-HSA-199991	M000010	1	0	Reactome Gene Sets	6	Membrane Trafficking		-2.48098	6.44272	4.33062	30284	553	34	4	11.7647	5.52551	7037|7277|11004|23243	TFRC|TUBA4A|KIF2C|ANKRD28	-1.39726	0	147	1	1	-2.48098	6.44272

## Sheet: Suppl.Table5
Supplementary Table 5. Differentially expressed genes across Xenium clusters
GENE	p_val	avg_log2FC	pct.1	pct.2	p_val_adj	cluster	gene
KRT17	0	5.90636	0.7	0.034	0	6	KRT17
FCER1A	0	9.04287	0.519	0.007	0	6	FCER1A
KRT6B	0	7.87076	0.519	0.007	0	6	KRT6B
TP63	0	6.61638	0.444	0.013	0	6	TP63
CX3CR1	1.57049e-269	6.15569	0.462	0.026	5.95217e-267	6	CX3CR1
KRT14	2.40464e-246	6.41478	0.8	0.094	9.1136e-244	6	KRT14
KRT5	8.67629e-219	4.6423	0.762	0.092	3.28831e-216	6	KRT5
FGL2	6.73017e-190	5.37589	0.719	0.095	2.55073e-187	6	FGL2
MNDA	1.44347e-174	5.20282	0.5	0.047	5.47074e-172	6	MNDA
SERPINB9	1.9601e-137	5.17399	0.488	0.056	7.42878e-135	6	SERPINB9
GLIPR1	3.65142e-124	4.65667	0.606	0.099	1.38389e-121	6	GLIPR1
FOXC1	1.25905e-110	5.22602	0.356	0.036	4.77182e-108	6	FOXC1
AIF1	7.00831e-94	4.21782	0.688	0.172	2.65615e-91	6	AIF1
PTPRC	2.92676e-93	3.99724	0.631	0.139	1.10924e-90	6	PTPRC
MYLK	8.46987e-93	4.69701	0.775	0.246	3.21008e-90	6	MYLK
CD4	1.68749e-91	4.02088	0.7	0.183	6.3956e-89	6	CD4
CDH3	1.97286e-85	3.48795	0.488	0.083	7.47712e-83	6	CDH3
CD86	8.31011e-80	4.40705	0.406	0.063	3.14953e-77	6	CD86
PTN	8.57911e-73	4.9458	0.288	0.034	3.25148e-70	6	PTN
GPR183	2.76624e-72	4.78659	0.288	0.035	1.0484e-69	6	GPR183
IGSF6	1.12414e-71	3.79847	0.631	0.177	4.26047e-69	6	IGSF6
SERPINA3	1.59954e-67	4.10978	0.25	0.028	6.06226e-65	6	SERPINA3
DST	1.75026e-65	4.17624	0.656	0.221	6.63347e-63	6	DST
VIM	1.26111e-61	2.48459	0.9	0.682	4.77961e-59	6	VIM
HAVCR2	5.09889e-58	3.96586	0.462	0.108	1.93248e-55	6	HAVCR2
C1QC	2.16405e-57	3.94593	0.512	0.133	8.20174e-55	6	C1QC
ITGAX	7.89156e-52	4.16636	0.419	0.097	2.9909e-49	6	ITGAX
BASP1	1.62621e-49	3.47021	0.481	0.134	6.16332e-47	6	BASP1
CYTIP	1.94072e-46	3.96402	0.288	0.05	7.35534e-44	6	CYTIP
CAV1	9.20436e-45	3.60867	0.362	0.082	3.48845e-42	6	CAV1
C5orf46	1.3546e-44	3.90077	0.275	0.047	5.13392e-42	6	C5orf46
FCER1G	3.96536e-44	3.39684	0.625	0.274	1.50287e-41	6	FCER1G
S100A4	3.62524e-43	3.06949	0.525	0.176	1.37396e-40	6	S100A4
SFRP1	1.2849e-38	4.13599	0.488	0.166	4.86978e-36	6	SFRP1
ACTA2	3.01783e-38	2.21086	0.806	0.669	1.14376e-35	6	ACTA2
IL2RG	6.77517e-37	3.44344	0.281	0.058	2.56779e-34	6	IL2RG
CD14	3.36333e-35	4.11979	0.4	0.121	1.2747e-32	6	CD14
C1QA	1.85253e-34	3.86667	0.306	0.072	7.02108e-32	6	C1QA
FLNA	2.58133e-32	2.52016	0.631	0.341	9.78323e-30	6	FLNA
VOPP1	1.70255e-26	3.22633	0.344	0.108	6.45266e-24	6	VOPP1
CXCL16	2.27557e-26	3.38477	0.362	0.123	8.62441e-24	6	CXCL16
LDHB	6.43208e-26	2.82883	0.344	0.109	2.43776e-23	6	LDHB
PECAM1	6.38122e-23	2.40756	0.456	0.204	2.41848e-20	6	PECAM1
DSP	1.10691e-21	1.96496	0.7	0.568	4.19517e-19	6	DSP
CD93	1.82699e-21	3.17695	0.281	0.087	6.9243e-19	6	CD93
GAPDH	3.67397e-20	0.591916	0.956	0.986	1.39244e-17	6	GAPDH
ZEB2	5.70616e-20	2.64722	0.45	0.222	2.16263e-17	6	ZEB2
CNN2	9.29955e-19	1.31476	0.775	0.772	3.52453e-16	6	CNN2
SPARC	4.5033e-14	0.882344	0.825	0.806	1.70675e-11	6	SPARC
CD68	2.0797e-12	2.47635	0.45	0.288	7.88206e-10	6	CD68
S100A14	4.09209e-11	1.94958	0.25	0.1	1.5509e-08	6	S100A14
SNAI2	6.49863e-11	2.7557	0.275	0.131	2.46298e-08	6	SNAI2
ACTG2	7.97256e-11	2.33153	0.556	0.496	3.0216e-08	6	ACTG2
CXCR4	1.40938e-10	2.18274	0.338	0.182	5.34155e-08	6	CXCR4
CCND1	1.46353e-10	1.05146	0.713	0.735	5.54677e-08	6	CCND1
LYZ	3.41247e-10	1.64052	0.688	0.633	1.29332e-07	6	LYZ
CD44	1.70823e-09	1.13312	0.613	0.561	6.47417e-07	6	CD44
FCGR3A	1.21133e-08	2.4854	0.269	0.139	4.59096e-06	6	FCGR3A
LPXN	1.1374e-07	2.12339	0.288	0.162	4.31074e-05	6	LPXN
SVIL	1.90786e-06	2.21785	0.281	0.171	0.00072308	6	SVIL
COL6A1	2.0527e-06	1.02525	0.569	0.547	0.000777972	6	COL6A1
COL1A2	1.27365e-05	0.523688	0.769	0.806	0.00482714	6	COL1A2
COL4A1	6.76968e-05	1.01623	0.525	0.499	0.0256571	6	COL4A1
COL1A1	9.9022e-05	0.311751	0.931	0.972	0.0375293	6	COL1A1
THY1	0.00023686	1.2041	0.288	0.195	0.0897701	6	THY1
PIK3CA	0.000402568	0.305631	0.194	0.377	0.152573	6	PIK3CA
RUNX1	0.00043688	0.793197	0.637	0.772	0.165578	6	RUNX1
COL5A1	0.000848709	1.0288	0.406	0.35	0.321661	6	COL5A1
SMS	0.00168413	1.43073	0.419	0.412	0.638287	6	SMS
MMP2	0.00285886	1.26811	0.331	0.269	1	6	MMP2
SRPK1	0.00297886	0.296255	0.3	0.496	1	6	SRPK1
GJB2	0.0031985	1.46221	0.3	0.247	1	6	GJB2
SH3YL1	0.0033258	0.66243	0.219	0.399	1	6	SH3YL1
PTEN	0.0076749	0.794379	0.594	0.707	1	6	PTEN
BAG1	0.00838241	1.16775	0.45	0.486	1	6	BAG1
COL5A11	0	1.48727	0.57	0.286	0	2	COL5A1
POSTN	0	1.58073	0.72	0.437	0	2	POSTN
MMP21	0	1.5719	0.481	0.207	0	2	MMP2
COL6A11	0	1.51726	0.758	0.485	0	2	COL6A1
VIM1	0	1.64448	0.892	0.62	0	2	VIM
LUM	0	1.43863	0.742	0.479	0	2	LUM
THY11	0	1.88193	0.383	0.14	0	2	THY1
COL10A1	0	1.24459	0.494	0.256	0	2	COL10A1
COL4A11	0	1.45415	0.655	0.453	0	2	COL4A1
MMP11	0	1.11049	0.427	0.231	0	2	MMP11
FLNA1	0	1.36029	0.49	0.298	0	2	FLNA
SFRP4	0	1.99831	0.325	0.136	0	2	SFRP4
CCDC80	0	1.79644	0.288	0.111	0	2	CCDC80
S100A41	0	1.7866	0.312	0.136	0	2	S100A4
SPARC1	0	1.41807	0.943	0.767	0	2	SPARC
ZEB21	0	1.5897	0.35	0.184	0	2	ZEB2
PECAM11	0	1.74144	0.331	0.166	0	2	PECAM1
TIMP1	0	1.04916	0.6	0.439	0	2	TIMP1
COL1A21	0	1.30593	0.928	0.771	0	2	COL1A2
CD41	0	1.84856	0.304	0.148	0	2	CD4
FCER1G1	0	1.45674	0.393	0.239	0	2	FCER1G
CXCL12	0	1.39648	0.369	0.217	0	2	CXCL12
SPARCL1	0	1.58972	0.299	0.15	0	2	SPARCL1
MYLK1	0	1.12676	0.358	0.214	0	2	MYLK
CD681	0	1.38627	0.398	0.256	0	2	CD68
COL3A1	0	1.3366	0.938	0.801	0	2	COL3A1
APOC1	0	1.57578	0.285	0.163	0	2	APOC1
TCIM	0	0.852017	0.655	0.538	0	2	TCIM
AIF11	0	1.44488	0.261	0.147	0	2	AIF1
ACTA21	0	0.915782	0.754	0.644	0	2	ACTA2
IGSF61	0	1.36853	0.256	0.154	0	2	IGSF6
ITM2C	0	1.11724	0.261	0.19	0	2	ITM2C
COL1A11	0	1.00919	0.987	0.967	0	2	COL1A1
CNN21	0	0.513695	0.782	0.77	0	2	CNN2
GJB21	7.95786e-74	0.497277	0.268	0.241	3.01603e-71	2	GJB2
BACE2	5.06486e-48	0.398664	0.25	0.228	1.91958e-45	2	BACE2
TRIB1	3.34215e-24	0.27074	0.321	0.372	1.26668e-21	2	TRIB1
ACTG21	0.00757823	0.275127	0.467	0.504	1	2	ACTG2
KRT10	0	0.650023	0.873	0.578	0	1	KRT10
AKR1C3	0	0.49709	0.78	0.615	0	1	AKR1C3
TCIM1	0	0.515148	0.685	0.524	0	1	TCIM
MYBPC1	0	0.488855	0.92	0.763	0	1	MYBPC1
PPARG	0	0.513432	0.823	0.681	0	1	PPARG
TFAP2A	0	0.604786	0.916	0.79	0	1	TFAP2A
SEC11C	0	0.378333	0.867	0.745	0	1	SEC11C
SDC4	0	0.322834	0.791	0.679	0	1	SDC4
TMEM147	0	0.295707	0.783	0.687	0	1	TMEM147
AKR1C1	0	0.33871	0.969	0.875	0	1	AKR1C1
ADAM9	0	0.40541	0.968	0.876	0	1	ADAM9
CD9	0	0.482553	0.978	0.924	0	1	CD9
ABCC11	0	0.396198	0.987	0.945	0	1	ABCC11
CDH1	0	0.282588	0.992	0.965	0	1	CDH1
SERHL2	0	0.397916	0.998	0.982	0	1	SERHL2
MUC1	0	0.296976	0.997	0.989	0	1	MUC1
AZGP1	0	0.372618	1	0.997	0	1	AZGP1
C6orf132	1.17812e-256	0.314586	0.396	0.319	4.46508e-254	1	C6orf132
HOOK2	7.81198e-251	0.280753	0.474	0.394	2.96074e-248	1	HOOK2
NAT1	4.78808e-201	0.36112	0.271	0.212	1.81468e-198	1	NAT1
NOSTRIN	1.44726e-181	0.292112	0.342	0.281	5.48512e-179	1	NOSTRIN
CTH	0	1.5096	0.73	0.318	0	4	CTH
KRT101	0	1.11411	0.959	0.581	0	4	KRT10
LYZ1	0	1.25854	0.93	0.563	0	4	LYZ
TFF3	0	1.07652	0.924	0.594	0	4	TFF3
SCUBE2	0	0.919381	0.83	0.503	0	4	SCUBE2
MYO5B	0	0.97785	0.572	0.248	0	4	MYO5B
JUP	0	0.683968	0.769	0.449	0	4	JUP
CCPG1	0	0.78643	0.864	0.553	0	4	CCPG1
GATA3	0	0.646321	0.761	0.452	0	4	GATA3
KMT2D	0	0.624408	0.77	0.475	0	4	KMT2D
USP53	0	0.59275	0.731	0.439	0	4	USP53
SQLE	0	0.780368	0.837	0.545	0	4	SQLE
SEC24A	0	0.553295	0.756	0.467	0	4	SEC24A
FGFR4	0	0.937396	0.45	0.164	0	4	FGFR4
DSP1	0	0.398532	0.791	0.516	0	4	DSP
BLVRA	0	0.562116	0.617	0.347	0	4	BLVRA
ITGA6	0	0.532525	0.615	0.346	0	4	ITGA6
AR	0	0.486915	0.818	0.552	0	4	AR
TENT5C	0	0.630695	0.531	0.267	0	4	TENT5C
TRAF4	0	0.456837	0.689	0.429	0	4	TRAF4
NOSTRIN1	0	0.698658	0.505	0.248	0	4	NOSTRIN
ACTG22	0	0.275728	0.701	0.448	0	4	ACTG2
C6orf1321	0	0.565587	0.54	0.292	0	4	C6orf132
WARS	0	0.434333	0.566	0.318	0	4	WARS
SMAP2	0	0.533091	0.507	0.262	0	4	SMAP2
AKR1C31	0	0.271973	0.853	0.611	0	4	AKR1C3
GRB7	0	0.489037	0.514	0.289	0	4	GRB7
TMEM45B	0	0.462601	0.93	0.706	0	4	TMEM45B
NARS	0	0.851138	0.968	0.749	0	4	NARS
SEC11C1	0	0.611893	0.951	0.735	0	4	SEC11C
MDM2	0	0.268987	0.901	0.687	0	4	MDM2
ANKRD28	0	0.394872	0.488	0.277	0	4	ANKRD28
MYBPC11	0	0.797544	0.969	0.764	0	4	MYBPC1
TRAPPC3	0	0.306533	0.884	0.683	0	4	TRAPPC3
NAT11	0	0.589165	0.379	0.192	0	4	NAT1
RORC	0	0.690098	0.331	0.15	0	4	RORC
ADH1B	0	0.562847	0.338	0.163	0	4	ADH1B
DAPK3	0	0.502375	0.309	0.144	0	4	DAPK3
PELI1	0	0.363062	0.282	0.144	0	4	PELI1
APOC11	0	0.349197	0.294	0.167	0	4	APOC1
MED12	0	0.286808	0.288	0.161	0	4	MED12
CTTN	0	0.681464	0.987	0.865	0	4	CTTN
FLNB	0	0.735022	0.989	0.872	0	4	FLNB
IGSF62	0	0.296345	0.268	0.156	0	4	IGSF6
MLPH	0	0.253409	0.945	0.833	0	4	MLPH
AKR1C11	0	0.490677	0.988	0.878	0	4	AKR1C1
ALDH1A3	0	0.306572	0.968	0.858	0	4	ALDH1A3
KRT8	0	0.462742	0.988	0.892	0	4	KRT8
SLC39A6	0	0.307223	0.982	0.892	0	4	SLC39A6
ERBB2	0	0.62476	0.994	0.923	0	4	ERBB2
MME	0	0.577397	0.991	0.922	0	4	MME
CD91	0	0.372919	0.991	0.925	0	4	CD9
KRT18	0	0.605167	0.996	0.931	0	4	KRT18
ABCC111	0	0.701327	0.999	0.945	0	4	ABCC11
CDH11	0	0.547533	0.998	0.966	0	4	CDH1
SCD	0	0.484606	0.998	0.969	0	4	SCD
TACSTD2	0	0.267308	0.997	0.969	0	4	TACSTD2
EPCAM	0	0.351092	0.998	0.972	0	4	EPCAM
FASN	0	0.715317	0.999	0.976	0	4	FASN
SERHL21	0	0.386352	1	0.983	0	4	SERHL2
KRT7	0	0.593678	1	0.986	0	4	KRT7
KRT19	0	0.512112	1	0.994	0	4	KRT19
S100A8	0	1.69644	0.524	0.278	0	3	S100A8
S100A141	0	2.79811	0.284	0.05	0	3	S100A14
SLC5A6	0	1.26626	0.447	0.291	0	3	SLC5A6
COL10A11	0	1.21284	0.43	0.277	0	3	COL10A1
MMP111	0	1.18511	0.385	0.246	0	3	MMP11
LYPD3	0	1.10345	0.416	0.304	0	3	LYPD3
COL1A22	0	0.701638	0.894	0.783	0	3	COL1A2
LUM1	0	0.644373	0.612	0.519	0	3	LUM
CXXC5	0	1.09586	0.341	0.249	0	3	CXXC5
COL3A11	0	0.558498	0.904	0.813	0	3	COL3A1
POSTN1	0	0.502494	0.572	0.482	0	3	POSTN
COL6A12	0	0.429701	0.617	0.528	0	3	COL6A1
MMP22	0	0.750007	0.333	0.252	0	3	MMP2
SOX4	0	1.00107	0.776	0.697	0	3	SOX4
SCUBE21	0	0.673563	0.624	0.55	0	3	SCUBE2
FGFR41	0	1.1055	0.275	0.203	0	3	FGFR4
SPARC2	0	0.518411	0.853	0.794	0	3	SPARC
SMS1	0	0.793327	0.446	0.403	0	3	SMS
CD24	0	1.00726	0.994	0.955	0	3	CD24
CCDC6	0	0.675716	0.736	0.702	0	3	CCDC6
COL1A12	0	0.666352	0.99	0.967	0	3	COL1A1
VEGFA	0	0.632551	0.867	0.85	0	3	VEGFA
EGFR	0	0.388169	0.856	0.871	0	3	EGFR
TPD52	0	0.530444	0.981	0.972	0	3	TPD52
ANKRD30A	0	0.530943	0.964	0.956	0	3	ANKRD30A
GAPDH1	0	0.589597	0.983	0.987	0	3	GAPDH
ACTA22	0	0.568186	0.667	0.67	0	3	ACTA2
DSC2	0	0.457011	0.675	0.677	0	3	DSC2
COL5A12	1.13469e-295	0.559886	0.397	0.337	4.30049e-293	3	COL5A1
MYLK2	4.15847e-295	0.636366	0.294	0.234	1.57606e-292	3	MYLK
KMT2C	1.19681e-278	0.374619	0.689	0.717	4.5359e-276	3	KMT2C
AQP3	3.87409e-275	0.639177	0.447	0.415	1.46828e-272	3	AQP3
PTEN1	2.78594e-257	0.353886	0.676	0.715	1.05587e-254	3	PTEN
RARA	1.34027e-150	0.370332	0.579	0.61	5.07964e-148	3	RARA
BACE21	2.6546e-108	0.613061	0.256	0.227	1.00609e-105	3	BACE2
SLC25A37	5.09637e-87	0.575016	0.273	0.255	1.93152e-84	3	SLC25A37
LARS	1.13298e-49	0.38414	0.489	0.531	4.29401e-47	3	LARS
FLNA2	1.26441e-49	0.356835	0.342	0.342	4.79212e-47	3	FLNA
GPR160	3.00206e-13	0.289564	0.504	0.565	1.13778e-10	3	GPR160
TIFA	1.84763e-12	0.288237	0.227	0.266	7.00252e-10	3	TIFA
MYBL2	0	3.10363	0.696	0.204	0	5	MYBL2
ANLN	0	3.61242	0.567	0.098	0	5	ANLN
TYMS	0	3.08012	0.609	0.15	0	5	TYMS
BIRC5	0	3.11503	0.558	0.117	0	5	BIRC5
TOP2A	0	3.43135	0.538	0.099	0	5	TOP2A
RRM2	0	3.49721	0.564	0.128	0	5	RRM2
PCLAF	0	3.23229	0.484	0.082	0	5	PCLAF
UBE2C	0	3.24728	0.423	0.078	0	5	UBE2C
CCNB1	0	3.14955	0.436	0.099	0	5	CCNB1
PTTG1	0	3.09855	0.393	0.072	0	5	PTTG1
CDC20	0	3.47049	0.364	0.052	0	5	CDC20
KIF2C	0	2.53981	0.415	0.106	0	5	KIF2C
CEP55	0	3.38093	0.341	0.041	0	5	CEP55
ORC6	0	2.53322	0.39	0.095	0	5	ORC6
MKI67	0	3.214	0.336	0.045	0	5	MKI67
MELK	0	3.20152	0.298	0.038	0	5	MELK
AURKA	0	1.73373	0.512	0.262	0	5	AURKA
CENPF	0	2.96809	0.287	0.044	0	5	CENPF
EXO1	0	3.49502	0.266	0.031	0	5	EXO1
NDC80	0	3.0664	0.254	0.035	0	5	NDC80
APOBEC3B	0	1.75102	0.359	0.141	0	5	APOBEC3B
UBE2T	0	2.56517	0.259	0.049	0	5	UBE2T
CDC6	0	2.33576	0.264	0.068	0	5	CDC6
TUBA4A	0	0.836509	0.258	0.144	0	5	TUBA4A
SLC5A61	0	0.60965	0.422	0.312	0	5	SLC5A6
CCDC61	0	0.551727	0.793	0.698	0	5	CCDC6
CD441	0	0.706033	0.641	0.55	0	5	CD44
MDM21	0	0.428034	0.801	0.718	0	5	MDM2
HMGA1	0	0.335197	0.823	0.764	0	5	HMGA1
TFRC	1.33354e-306	0.291716	0.831	0.778	5.05413e-304	5	TFRC
EIF4EBP1	4.85793e-279	0.397285	0.536	0.433	1.84116e-276	5	EIF4EBP1
ENAH	4.63965e-202	0.289006	0.828	0.778	1.75843e-199	5	ENAH
SRPK11	8.2744e-190	0.328081	0.566	0.487	3.136e-187	5	SRPK1
SLC25A371	3.81324e-183	0.514154	0.326	0.25	1.44522e-180	5	SLC25A37
ITGA61	1.68944e-157	0.386928	0.462	0.389	6.40299e-155	5	ITGA6
TIFA1	5.17939e-148	0.411389	0.32	0.25	1.96299e-145	5	TIFA
SMS2	2.05872e-146	0.30678	0.481	0.403	7.80254e-144	5	SMS
TP53TG1	3.91274e-139	0.260479	0.647	0.581	1.48293e-136	5	TP53TG1
CD241	1.10845e-131	0.281834	0.972	0.962	4.20102e-129	5	CD24
CXXC51	6.46043e-131	0.451174	0.326	0.261	2.4485e-128	5	CXXC5
TENT5C1	3.20759e-62	0.261508	0.357	0.312	1.21568e-59	5	TENT5C
NOSTRIN2	1.04223e-54	0.310107	0.334	0.292	3.95006e-52	5	NOSTRIN

## Sheet: Suppl.Table6
Supplementary Table 6. Differentially expressed genes of subsets within cancer cell of public single cell data.
GENE	p_val	avg_log2FC	pct.1	pct.2	p_val_adj	cluster	gene
MTATP6P1	0	1.78243	0.98	0.874	0	2	MTATP6P1
MT-ATP8	2.00E-302	1.00566	0.997	0.991	6.98E-298	2	MT-ATP8
MT-ND1	1.91E-262	0.831373	0.998	0.999	6.65E-258	2	MT-ND1
MT-ATP6	1.59E-253	0.715842	0.999	1	5.53E-249	2	MT-ATP6
MT-ND2	8.59E-232	0.81595	0.998	0.999	3.00E-227	2	MT-ND2
MT-ND3	2.96E-206	0.717324	0.998	0.999	1.03E-201	2	MT-ND3
MT-CYB	7.84E-205	0.609912	0.998	0.999	2.74E-200	2	MT-CYB
MT-ND4L	4.56E-200	1.08545	0.992	0.974	1.59E-195	2	MT-ND4L
MT-CO1	9.44E-195	0.537634	1	0.999	3.30E-190	2	MT-CO1
MT-ND4	7.68E-193	0.6548	0.998	1	2.68E-188	2	MT-ND4
MT-CO2	2.57E-191	0.646614	0.998	0.999	8.98E-187	2	MT-CO2
MT-CO3	2.37E-181	0.526477	0.999	1	8.27E-177	2	MT-CO3
MT-ND5	1.14E-175	0.717873	0.994	0.994	3.99E-171	2	MT-ND5
PTPN1	3.06E-128	0.850893	0.942	0.807	1.07E-123	2	PTPN1
RPL41	2.51E-122	0.937271	0.866	0.812	8.77E-118	2	RPL41
MT-TP	9.73E-109	1.25349	0.74	0.571	3.40E-104	2	MT-TP
CXCL14	3.60E-107	2.45723	0.503	0.216	1.26E-102	2	CXCL14
DHRS2	6.10E-89	0.671867	0.95	0.774	2.13E-84	2	DHRS2
MT-RNR1	3.06E-82	0.383262	1	0.999	1.07E-77	2	MT-RNR1
LINC02522	2.42E-80	1.30309	0.639	0.441	8.44E-76	2	LINC02522
MAGI2	2.27E-73	1.6934	0.454	0.23	7.93E-69	2	MAGI2
RPL13AP5	1.05E-72	1.63219	0.517	0.327	3.66E-68	2	RPL13AP5
CD52	1.55E-69	1.17324	0.571	0.346	5.39E-65	2	CD52
STC2	1.17E-61	0.782099	0.832	0.755	4.08E-57	2	STC2
RPS2P5	4.09E-60	1.91223	0.352	0.168	1.43E-55	2	RPS2P5
CNTNAP2	7.91E-60	1.96337	0.342	0.156	2.76E-55	2	CNTNAP2
MS4A1	5.17E-59	2.20996	0.269	0.095	1.81E-54	2	MS4A1
RPL8	1.98E-58	0.380248	0.969	0.986	6.91E-54	2	RPL8
RPL6	1.65E-57	0.42401	0.961	0.969	5.74E-53	2	RPL6
RPL9P9	2.92E-57	1.19697	0.607	0.498	1.02E-52	2	RPL9P9
MT-TE	4.51E-57	1.30242	0.539	0.384	1.57E-52	2	MT-TE
MIF	3.48E-56	1.19871	0.49	0.302	1.21E-51	2	MIF
AC016739.1	1.21E-54	0.95343	0.694	0.639	4.23E-50	2	AC016739.1
AL365357.1	2.09E-54	1.74029	0.411	0.244	7.29E-50	2	AL365357.1
UGCG	5.04E-54	0.860346	0.728	0.644	1.76E-49	2	UGCG
AC007969.1	1.28E-53	1.25355	0.551	0.421	4.48E-49	2	AC007969.1
CST3	1.73E-49	0.744605	0.897	0.896	6.03E-45	2	CST3
MTCO3P12	1.52E-44	1.84311	0.314	0.163	5.30E-40	2	MTCO3P12
RPL41P5	5.77E-44	1.5419	0.393	0.243	2.01E-39	2	RPL41P5
MTCO1P12	6.49E-44	1.1953	0.519	0.399	2.26E-39	2	MTCO1P12
MTND2P28	4.38E-42	1.43538	0.432	0.29	1.53E-37	2	MTND2P28
MIR205HG	4.50E-40	1.51323	0.447	0.314	1.57E-35	2	MIR205HG
RPL12P4	5.47E-39	1.62233	0.374	0.237	1.91E-34	2	RPL12P4
AC024293.1	8.99E-39	1.0744	0.528	0.42	3.14E-34	2	AC024293.1
RPS15	9.70E-39	0.272841	0.978	0.993	3.39E-34	2	RPS15
MED15P9	1.27E-36	1.8012	0.318	0.186	4.42E-32	2	MED15P9
RPL30	1.96E-35	0.279328	0.989	0.996	6.85E-31	2	RPL30
HSP90AB3P	5.54E-35	1.11212	0.494	0.385	1.93E-30	2	HSP90AB3P
AC125603.1	7.35E-35	0.62739	0.684	0.548	2.56E-30	2	AC125603.1
RPL13P12	3.09E-32	1.21118	0.471	0.376	1.08E-27	2	RPL13P12
RAMP3	6.00E-30	1.02434	0.469	0.342	2.10E-25	2	RAMP3
KRT19	1.67E-27	0.359547	0.919	0.916	5.84E-23	2	KRT19
RPL22	1.06E-26	0.373746	0.89	0.917	3.71E-22	2	RPL22
MT-TL1	1.41E-26	0.987007	0.51	0.437	4.92E-22	2	MT-TL1
MT-TW	1.16E-25	1.48179	0.322	0.215	4.05E-21	2	MT-TW
RPS28	2.25E-25	0.262965	0.955	0.984	7.84E-21	2	RPS28
PARD6B	9.87E-25	0.59503	0.66	0.59	3.45E-20	2	PARD6B
RPS3A	1.07E-24	0.297035	0.942	0.979	3.73E-20	2	RPS3A
KRT15	4.10E-24	0.743415	0.627	0.551	1.43E-19	2	KRT15
SYAP1	8.56E-24	0.495324	0.805	0.806	2.99E-19	2	SYAP1
RPL6P27	1.15E-20	0.998304	0.446	0.38	4.00E-16	2	RPL6P27
RPS3AP6	6.04E-20	1.3671	0.313	0.224	2.11E-15	2	RPS3AP6
AC116533.1	9.29E-18	1.05578	0.388	0.316	3.24E-13	2	AC116533.1
RAMP1	2.29E-17	0.942507	0.386	0.298	7.99E-13	2	RAMP1
RPS28P7	3.87E-17	1.27223	0.311	0.232	1.35E-12	2	RPS28P7
LURAP1L	4.69E-17	0.785814	0.488	0.424	1.64E-12	2	LURAP1L
CCND1	2.76E-16	0.437723	0.763	0.728	9.62E-12	2	CCND1
RPL29	5.50E-16	0.254181	0.914	0.944	1.92E-11	2	RPL29
RPL18AP3	6.65E-16	1.20692	0.345	0.276	2.32E-11	2	RPL18AP3
HIST1H2AE	1.31E-15	0.811407	0.462	0.405	4.58E-11	2	HIST1H2AE
RPS27AP16	1.48E-15	1.23122	0.292	0.216	5.17E-11	2	RPS27AP16
PDIA3P1	1.01E-14	1.01573	0.365	0.301	3.52E-10	2	PDIA3P1
MAPT	1.27E-14	0.756262	0.422	0.355	4.43E-10	2	MAPT
AC099560.2	3.18E-14	0.827813	0.449	0.406	1.11E-09	2	AC099560.2
RPS10	7.93E-14	0.803577	0.455	0.41	2.77E-09	2	RPS10
PDCD4	8.73E-14	0.4918	0.651	0.665	3.05E-09	2	PDCD4
STARD10	9.29E-14	0.64576	0.571	0.539	3.24E-09	2	STARD10
RPL14P1	1.45E-13	0.893922	0.389	0.332	5.08E-09	2	RPL14P1
RPL3P4	1.73E-13	1.0225	0.376	0.324	6.02E-09	2	RPL3P4
SLC9A3R1	4.32E-13	0.534989	0.684	0.683	1.51E-08	2	SLC9A3R1
YWHAZ	4.46E-13	0.331873	0.865	0.845	1.56E-08	2	YWHAZ
CHRNA9	5.39E-13	1.41531	0.254	0.186	1.88E-08	2	CHRNA9
AC122713.2	9.84E-13	0.870705	0.401	0.342	3.43E-08	2	AC122713.2
RPS23P8	2.79E-12	1.18755	0.27	0.205	9.74E-08	2	RPS23P8
AC005912.1	2.91E-12	1.10724	0.307	0.246	1.01E-07	2	AC005912.1
GLO1	7.27E-12	0.416914	0.72	0.738	2.54E-07	2	GLO1
TRBC2	1.45E-11	0.781475	0.251	0.178	5.04E-07	2	TRBC2
CCDC144NL-AS1	1.57E-11	0.862032	0.407	0.355	5.46E-07	2	CCDC144NL-AS1
H3F3A	2.49E-11	1.01223	0.291	0.228	8.70E-07	2	H3F3A
RSL1D1	2.51E-11	0.291072	0.804	0.827	8.78E-07	2	RSL1D1
IFITM1	5.29E-11	1.07985	0.271	0.208	1.84E-06	2	IFITM1
MRPS30-DT	1.25E-10	0.923635	0.309	0.245	4.37E-06	2	MRPS30-DT
RPL21P28	4.75E-10	0.640347	0.506	0.501	1.66E-05	2	RPL21P28
SORD	9.76E-10	1.03038	0.307	0.259	3.41E-05	2	SORD
RPL10A	7.05E-09	0.273264	0.778	0.83	0.000245961	2	RPL10A
VAV3	3.29E-08	0.584043	0.508	0.504	0.00114957	2	VAV3
NPM1P39	3.84E-08	0.990488	0.258	0.212	0.00133994	2	NPM1P39
ADIRF	9.48E-08	0.370715	0.817	0.863	0.00330922	2	ADIRF
NBN	1.36E-07	0.415322	0.605	0.627	0.00474057	2	NBN
BCAS4	1.64E-07	0.716985	0.394	0.37	0.00572725	2	BCAS4
AL590867.2	2.27E-07	0.94579	0.301	0.267	0.00792551	2	AL590867.2
GSTM3	8.88E-07	0.74017	0.505	0.517	0.0310066	2	GSTM3
ZRANB2	1.53E-06	0.413163	0.65	0.675	0.0533036	2	ZRANB2
SELENOH	2.26E-06	0.848326	0.351	0.332	0.0790362	2	SELENOH
HIST1H2BD	2.39E-05	0.450264	0.492	0.492	0.834072	2	HIST1H2BD
MAN1A1	3.66E-05	0.4685	0.485	0.478	1	2	MAN1A1
HIST1H2BG	4.81E-05	0.502799	0.425	0.411	1	2	HIST1H2BG
MED13L	8.97E-05	0.368499	0.633	0.683	1	2	MED13L
RETREG1	0.000104152	0.663714	0.388	0.382	1	2	RETREG1
NPM1P27	0.00019553	0.698552	0.341	0.332	1	2	NPM1P27
BMPR1B	0.000273	0.364149	0.471	0.453	1	2	BMPR1B
MYL9	0.000419461	0.760363	0.273	0.252	1	2	MYL9
MLPH	0.000434297	0.690999	0.458	0.488	1	2	MLPH
FBXO32	0.000453651	0.413037	0.429	0.416	1	2	FBXO32
SPDEF	0.000950158	0.785028	0.278	0.26	1	2	SPDEF
AGR2	0.000959836	0.267264	0.703	0.785	1	2	AGR2
ZNF552	0.000994979	0.725439	0.333	0.326	1	2	ZNF552
HMGXB4	0.00119635	0.315628	0.22	0.286	1	2	HMGXB4
OXLD1	0.00156588	0.329382	0.222	0.289	1	2	OXLD1
ASB13	0.00197802	0.288378	0.212	0.273	1	2	ASB13
AP000769.1	0.00202258	0.523269	0.375	0.367	1	2	AP000769.1
SCGB2A1	0.00219486	0.867635	0.217	0.28	1	2	SCGB2A1
AARD	0.00221115	0.616582	0.386	0.471	1	2	AARD
SYNGR1	0.00307969	0.279874	0.234	0.299	1	2	SYNGR1
HLA-DRA	0.00365148	0.322837	0.391	0.372	1	2	HLA-DRA
AFDN	0.00457531	0.746747	0.336	0.337	1	2	AFDN
HEBP1	0.00494709	0.341582	0.2	0.254	1	2	HEBP1
SELENOP	0.00497329	0.383235	0.554	0.608	1	2	SELENOP
MAP9	0.00894379	0.281793	0.215	0.268	1	2	MAP9
SYCP2	0.008957	0.468179	0.509	0.53	1	2	SYCP2
IFI27	4.35E-206	1.29263	0.98	0.659	1.52E-201	4	IFI27
PABPC1	6.08E-185	0.638718	0.999	0.997	2.12E-180	4	PABPC1
HSPE1	1.45E-158	1.0789	0.939	0.704	5.07E-154	4	HSPE1
IGFBP5	2.81E-134	1.83713	0.603	0.234	9.81E-130	4	IGFBP5
RPS21	2.08E-131	0.631057	0.994	0.968	7.25E-127	4	RPS21
RPLP0	6.11E-122	0.586959	0.997	0.971	2.13E-117	4	RPLP0
RPS29	3.12E-117	0.587421	0.99	0.956	1.09E-112	4	RPS29
RPLP1	5.08E-117	0.45662	1	0.997	1.77E-112	4	RPLP1
RPL301	3.65E-110	0.485928	0.999	0.991	1.28E-105	4	RPL30
ISG15	8.65E-107	1.30727	0.748	0.424	3.02E-102	4	ISG15
SULF1	9.80E-102	2.94327	0.263	0.047	3.42E-97	4	SULF1
RPL38	5.06E-97	0.555442	0.982	0.921	1.77E-92	4	RPL38
HSP90AB1	1.62E-96	0.482849	1	0.982	5.66E-92	4	HSP90AB1
VMP1	4.50E-95	1.08872	0.809	0.566	1.57E-90	4	VMP1
HSPD1	7.25E-95	0.713872	0.944	0.81	2.53E-90	4	HSPD1
BST2	9.96E-95	0.906319	0.87	0.618	3.48E-90	4	BST2
CYB5A	3.93E-87	1.04351	0.818	0.61	1.37E-82	4	CYB5A
KRT8	1.62E-84	0.708059	0.945	0.824	5.64E-80	4	KRT8
CBR1	1.86E-81	1.08432	0.699	0.419	6.48E-77	4	CBR1
TYMP	3.59E-81	1.2864	0.575	0.285	1.25E-76	4	TYMP
HSPB1	7.89E-80	0.62792	0.975	0.88	2.76E-75	4	HSPB1
KCNK15	5.63E-79	1.33576	0.51	0.237	1.96E-74	4	KCNK15
SQLE	1.15E-77	0.892787	0.837	0.595	4.02E-73	4	SQLE
CYP2B7P	1.55E-76	0.80248	0.83	0.545	5.41E-72	4	CYP2B7P
EIF3H	7.41E-72	0.586097	0.945	0.801	2.59E-67	4	EIF3H
ACTG1	7.48E-71	0.562442	0.974	0.91	2.61E-66	4	ACTG1
TRIB1	6.28E-66	1.14918	0.596	0.351	2.19E-61	4	TRIB1
COX6A1	2.28E-65	0.52484	0.962	0.85	7.95E-61	4	COX6A1
MYC	2.58E-64	1.19002	0.559	0.314	9.01E-60	4	MYC
ANKRD42	7.10E-64	1.48962	0.375	0.152	2.48E-59	4	ANKRD42
IFI6	4.20E-63	0.800653	0.855	0.661	1.47E-58	4	IFI6
SERPINI1	1.22E-61	1.78338	0.355	0.143	4.27E-57	4	SERPINI1
LGALS1	3.60E-61	0.603417	0.85	0.637	1.26E-56	4	LGALS1
NDUFB9	9.60E-59	0.5002	0.953	0.817	3.35E-54	4	NDUFB9
ATP5F1E	1.18E-58	0.471015	0.974	0.902	4.13E-54	4	ATP5F1E
CPNE3	5.23E-58	0.523683	0.932	0.799	1.82E-53	4	CPNE3
ACOX2	3.35E-57	1.29846	0.397	0.178	1.17E-52	4	ACOX2
TSPO	7.28E-57	0.761046	0.785	0.607	2.54E-52	4	TSPO
PSMA7	8.43E-57	0.456874	0.987	0.933	2.94E-52	4	PSMA7
SELENOW	9.99E-57	0.591525	0.885	0.749	3.49E-52	4	SELENOW
S100A10	3.74E-56	0.619609	0.884	0.741	1.31E-51	4	S100A10
UQCRB	4.03E-56	0.422686	0.977	0.891	1.41E-51	4	UQCRB
HSPA1A	7.58E-56	0.765588	0.732	0.502	2.65E-51	4	HSPA1A
SDC2	9.69E-56	0.687288	0.707	0.435	3.38E-51	4	SDC2
TMSB4X	1.09E-54	0.452887	0.982	0.925	3.79E-50	4	TMSB4X
RPL37A	2.78E-54	0.317307	0.996	0.987	9.72E-50	4	RPL37A
TOB2	4.16E-53	1.08591	0.501	0.27	1.45E-48	4	TOB2
[truncated: 3,587 more rows]
